# Supplementary material for: Unravelling strong temperature-dependence of JHD in transition metal hydrides: solvation and non-covalent interactions versus temperature-elastic H–H bonds
Source: Royal Society of Chemistry journal article supplement (doi:10.1039/d3sc04197b), 2023-01-01
Supplement: d3sc04197b1.pdf [file d3sc04197b1.pdf]

# Supporting Information

## Unravelling Strong Temperature-Dependence of $J_{\text{HD}}$ in Transition Metal Hydrides: Solvation and Non-Covalent Interactions with Solvent versus Temperature-Elastic H-H Bonds

### Table of Contents

|                                                                                                                                                                                               |            |
|-----------------------------------------------------------------------------------------------------------------------------------------------------------------------------------------------|------------|
| <b>1. Experimental part.....</b>                                                                                                                                                              | <b>S3</b>  |
| 1.1 General considerations and procedures.....                                                                                                                                                | S3         |
| 1.2 X-ray crystallography.....                                                                                                                                                                | S4         |
| 1.3 Neutron diffraction study.....                                                                                                                                                            | S6         |
| 1.4 Analysis of thermal motion in ( <i>p</i> -H-POCOP)IrH <sub>2</sub> .....                                                                                                                  | S8         |
| <b>2. Additional NMR data.....</b>                                                                                                                                                            | <b>S11</b> |
| <b>Figure S2.</b> Variable temperature <sup>1</sup> H NMR spectra of (X-POCOP)IrH <sub>2</sub> and (PCP)IrH <sub>2</sub> in toluene- <i>d</i> <sub>8</sub> , the hydride region is shown..... | S11        |
| <b>Figure S3.</b> Variable temperature <sup>1</sup> H NMR spectra of ( <i>p</i> -MeOOC-POCOP)IrH <sub>2</sub> in toluene- <i>d</i> <sub>8</sub> and CD <sub>2</sub> Cl <sub>2</sub> .....     | S12        |
| <b>Table S4.</b> Selected NMR data for (X-POCOP)IrH <sub>2</sub> and (PCP)IrH <sub>2</sub> .....                                                                                              | S13        |
| <b>3. Fitting of <sup>1</sup>H NMR chemical shifts and <math>J_{\text{HD}}</math> coupling constants.....</b>                                                                                 | <b>S14</b> |
| 3.1 Accuracy of coupling constant measurement.....                                                                                                                                            | S14        |
| 3.2 Accuracy of fitting.....                                                                                                                                                                  | S16        |
| 3.3 Fitting procedures.....                                                                                                                                                                   | S17        |
| 3.4 Model chemistry.....                                                                                                                                                                      | S17        |
| 3.5 Complex ( <i>m</i> -bis-CF <sub>3</sub> -POCOP)IrH <sub>2</sub> in toluene- <i>d</i> <sub>8</sub> .....                                                                                   | S18        |
| 3.6 Complex ( <i>p</i> -MeOOC-POCOP)IrH <sub>2</sub> in toluene- <i>d</i> <sub>8</sub> .....                                                                                                  | S20        |
| 3.7 Complexes ( <i>p</i> -H-POCOP)IrH <sub>2</sub> and ( <i>p</i> -MeO-POCOP)IrH <sub>2</sub> in toluene- <i>d</i> <sub>8</sub> : notes.....                                                  | S21        |
| 3.8 Complex ( <i>p</i> -H-POCOP)IrH <sub>2</sub> in toluene- <i>d</i> <sub>8</sub> .....                                                                                                      | S22        |
| 3.9 Complex ( <i>p</i> -MeO-POCOP)IrH <sub>2</sub> in toluene- <i>d</i> <sub>8</sub> .....                                                                                                    | S23        |
| <b>Table S6.</b> A summary of two-component ( <b>S</b> and <b>NS</b> ) model fit of NMR spectra of (X-POCOP)IrH <sub>2</sub> in toluene- <i>d</i> <sub>8</sub> .....                          | S25        |
| <b>Table S7.</b> Experimental and calculated distances and energies relevant to <b>S</b> and <b>NS</b> structures in (X-POCOP)IrH <sub>2</sub> complexes.....                                 | S26        |
| <b>4. Evaluating isotope effects in (X-POCOP)IrH<sub>2</sub>.....</b>                                                                                                                         | <b>S27</b> |

|                                                                                                                                                                                              |            |
|----------------------------------------------------------------------------------------------------------------------------------------------------------------------------------------------|------------|
| <b>Table S8.</b> Experimental and calculated isotope effects on chemicals shifts in (X-POCOP)IrH <sub>2</sub> .....                                                                          | S30        |
| <b>5. IR spectroscopy of (X-POCOP)IrH<sub>2</sub>.....</b>                                                                                                                                   | <b>S32</b> |
| <b>6. Halogen bond strength estimation.....</b>                                                                                                                                              | <b>S34</b> |
| 6.1 General notes.....                                                                                                                                                                       | S34        |
| 6.2 Fitting of $\delta(\text{IrH}_2)$ - $T$ dependence.....                                                                                                                                  | S34        |
| 6.3 Fitting to 1:1 binding isotherm.....                                                                                                                                                     | S36        |
| 6.4 Analysis of ( <i>p</i> -MeOOC-POCOP)IrH <sub>2</sub> ---C <sub>4</sub> F <sub>9</sub> I $\leftrightarrow$ ( <i>p</i> -MeOOC-POCOP)IrH(C <sub>4</sub> F <sub>9</sub> I)H equilibrium..... | S37        |
| <b>7. Dihydrogen bonding with CH<sub>2</sub>Cl<sub>2</sub>.....</b>                                                                                                                          | <b>S38</b> |
| <b>8. A control experiment evaluating the effect of relative permittivity on (<i>p</i>-H-POCOP)IrH<sub>2</sub>.....</b>                                                                      | <b>S44</b> |
| <b>9. Computational details.....</b>                                                                                                                                                         | <b>S45</b> |
| 9.1 General considerations.....                                                                                                                                                              | S45        |
| 9.2 Additional computational data.....                                                                                                                                                       | S47        |
| 9.3 Explicit solvation attempts.....                                                                                                                                                         | S56        |
| 9.4 Examining the possible multireference nature of (X-POCOP)IrH <sub>2</sub> and (PCP)IrH <sub>2</sub> ...                                                                                  | S58        |
| <b>10. Calculation of NMR chemical shifts and coupling constants.....</b>                                                                                                                    | <b>S60</b> |
| <b>11. Re-evaluation of complex Cp*Ru(dppm)H<sub>2</sub><sup>+</sup>.....</b>                                                                                                                | <b>S62</b> |
| 11.1 Re-evaluation of complex Cp*Ru(dppm)H <sub>2</sub> <sup>+</sup> .....                                                                                                                   | S62        |
| 11.2 Explicit solvation by one CH <sub>2</sub> Cl <sub>2</sub> molecule.....                                                                                                                 | S64        |
| 11.3 Possible ion pairing effects.....                                                                                                                                                       | S66        |
| <b>Table S15.</b> The effect of solid-state interactions on some transition metal hydrides.....                                                                                              | S68        |
| <b>12. Probing the “continuum” of H-H bond activation by transition metals.....</b>                                                                                                          | <b>S64</b> |
| <b>13. Examination of transition metal hydrides with XRD-based <math>r(\text{H-H})</math> 1.15-1.25 Å.....</b>                                                                               | <b>S69</b> |
| <b>14. References.....</b>                                                                                                                                                                   | <b>S73</b> |
| <b>15. List of Cartesian coordinates.....</b>                                                                                                                                                | <b>S77</b> |

## 1. Experimental part

**1.1. General considerations.** All manipulations were carried out under an inert gas atmosphere using standard Schlenk, high vacuum line and glovebox techniques unless otherwise stated. Toluene-*d*<sub>8</sub>, methylcyclohexane-*d*<sub>12</sub> and THF-*d*<sub>8</sub> were distilled under vacuum from Na/benzophenone. CD<sub>2</sub>Cl<sub>2</sub>, C<sub>6</sub>F<sub>5</sub>I and C<sub>4</sub>F<sub>9</sub>I were distilled from CaH<sub>2</sub>. NMR spectra were recorded on Bruker Avance 400 MHz, Bruker Avance 500 MHz and Varian Unity INOVA 500 MHz instrument. <sup>1</sup>H and <sup>13</sup>C NMR chemical shifts are reported in parts per million and referenced to the residual signals of deuterated solvents (toluene-*d*<sub>8</sub>: 7.09, 137.48; CD<sub>2</sub>Cl<sub>2</sub>: 5.32, 53.84; THF-*d*<sub>8</sub>: 3.58, 67.21). <sup>31</sup>P NMR chemical shifts are reported relative to external 85% solution of phosphoric acid. Calibration curve obtained using neat methanol sample was used for variable temperature measurements. Spin-lattice relaxation times (*T*<sub>1</sub>) were measured using a standard inversion recovery pulse sequence. All *T*<sub>1</sub>(min) values are provided at 500 MHz. IR spectra were recorded on a Bruker Alpha spectrometer. Complexes (*p*-H-POCOP)IrH<sub>2</sub>, (*p*-MeO-POCOP)IrH<sub>2</sub>, (*p*-MeOOC-POCOP)IrH<sub>2</sub>, (*m*-bis-CF<sub>3</sub>-POCOP)IrH<sub>2</sub>, and (PCP)IrH<sub>2</sub>, were prepared according to slightly modified literature procedure<sup>4</sup> as described below; the NMR spectra matched the literature data.<sup>1-4</sup>

### Synthesis of dihydride complexes

In a nitrogen atmosphere glovebox, 0.080 mmol of the respective pincer hydrido-chloride complexes and 0.080 mmol (1/1) of <sup>t</sup>BuOK were placed in a thick-walled flask. The flask was evacuated and benzene (15 ml) was vacuum-transferred, followed by refilling with H<sub>2</sub> at -196 °C. The reaction mixture was left to stir at 25...40 °C until the reaction was complete, as was indicated by a color change from red-orange to colorless or very pale yellow (typically 24-48 h). The flask was refilled with Ar (caution when opening: ca. 4 atm pressure!), degassed water (10 ml) was added and the mixture was intensely stirred for 10 min. The organic layer was filtered through a thin pad of Celite via cannula, and the water layer was washed with 5 ml of benzene that was also passed through the same pad of Celite. The organic fractions were combined and the volatiles were evaporated in vacuum to provide a mixture of the respective dihydride and tetrahydride complexes. After proper drying in high vacuum, the respective dihydride complexes were obtained in almost quantitative yields as red or red-orange solids. For (*p*-MeOOC-POCOP)IrH<sub>2</sub> and (*m*-bis-CF<sub>3</sub>-POCOP)IrH<sub>2</sub>, and especially for (PCP)IrH<sub>2</sub>, drying have to be performed at elevated temperatures in order to achieve IrH<sub>4</sub> to IrH<sub>2</sub> conversion in a reasonable time.

Selected “fingerprint” NMR signals of the dihydride complexes obtained at uniform conditions (toluene-*d*<sub>8</sub>, 25 °C) are given below:

| Complex                       | X = <i>p</i> -MeO-                                  | X = <i>p</i> -H-                                | X = <i>p</i> -MeOOC-                            | X <sub>2</sub> = <i>m</i> -bis-CF <sub>3</sub> - | (PCP)IrH <sub>2</sub>                           |
|-------------------------------|-----------------------------------------------------|-------------------------------------------------|-------------------------------------------------|--------------------------------------------------|-------------------------------------------------|
| δ( <sup>1</sup> H), Ir-H, ppm | -17.57 ( <sup>2</sup> J <sub>PH</sub> = ca. 8.1 Hz) | -16.99 ( <sup>2</sup> J <sub>PH</sub> = 8.2 Hz) | -16.16 ( <sup>2</sup> J <sub>PH</sub> = 8.5 Hz) | -16.16 ( <sup>2</sup> J <sub>PH</sub> = 8.9 Hz)  | -19.16 ( <sup>2</sup> J <sub>PH</sub> = 8.8 Hz) |
| δ( <sup>31</sup> P), ppm      | 206.6                                               | 204.0                                           | 203.9                                           | 213.4                                            | 85.8                                            |

### **Synthesis of partially deuterated (X-POCOP)IrH<sub>2</sub> and (PCP)IrH<sub>2</sub>**

In a typical experiment, a solution of the respective dihydride in C<sub>6</sub>D<sub>6</sub> in a J. Young NMR tube was freeze-pump-thaw degassed and refilled with D<sub>2</sub> gas. After vigorous shaking, the solution was allowed to react, and once the desired degree of deuteration was achieved, typically within minutes, the solution was evaporated and dried under dynamic high vacuum to convert tetrahydride form into dihydride form. A mixture of IrH<sub>2</sub>, IrHD and IrD<sub>2</sub> isotopomers was thus obtained. The mixture was used immediately after preparation due to deuterium scrambling into *tert*-butyl groups.

### **VT NMR analysis of (X-POCOP)IrH<sub>2</sub> and (PCP)IrH<sub>2</sub>**

In a typical experiment, in a nitrogen atmosphere glovebox, 0.024 mmol of the respective dihydride was placed in a J. Young NMR tube, and 0.5 ml of deuterated solvent was added via syringe. The NMR tube was freeze-pump-thaw degassed, refilled with Ar and shaken for 1 min to dissolve and mix the chemicals. After that, the tube was quickly inserted into the NMR spectrometer and was followed by <sup>1</sup>H and <sup>31</sup>P NMR.

### **VT NMR analysis of (X-POCOP)IrH<sub>2</sub> and (PCP)IrH<sub>2</sub> in the presence of halogen bond acceptors**

In a typical experiment, in the nitrogen atmosphere glovebox, 0.024 mmol of the respective dihydride was placed in a J. Young NMR tube, and 0.5 ml of toluene-*d*<sub>8</sub> was added. The NMR tube was degassed, and refilled with Ar. This was followed by addition of the specified amount of C<sub>6</sub>F<sub>5</sub>I or C<sub>4</sub>F<sub>9</sub>I via a septum cap and quickly brought to a spectrometer pre-cooled to a desired temperature. All dihydrides studied react with C<sub>6</sub>F<sub>5</sub>I with formation of the respective IrHI complexes; the reactivity follows order *p*-MeOOC ≈ *m*-bis-CF<sub>3</sub> < *p*-H < *p*-MeO << (PCP)IrH<sub>2</sub>. Dihydrides with X = *p*-MeOOC, *m*-bis-CF<sub>3</sub> and *p*-H allow rapid handling at room temperature, while X = *p*-MeO and especially (PCP)IrH<sub>2</sub> react with C<sub>6</sub>F<sub>5</sub>I within minutes. Therefore, for those complexes, C<sub>6</sub>F<sub>5</sub>I or C<sub>4</sub>F<sub>9</sub>I were added to a solution of dihydrides pre-cooled to -60 °C, and the cooling was maintained until the tube was inserted into a NMR spectrometer. For titration purposes, the concentration of (X-POCOP)IrH<sub>2</sub> was adjusted to account for an amount of dihydrides that was converted to IrHI during sample preparation.

## 1.2 X-ray crystallography

Intensity data were collected with an *Oxford Diffraction* Excalibur 3 system, using  $\omega$ -scans and Mo K $\alpha$  ( $\lambda = 0.71073 \text{ \AA}$ ) radiation.<sup>5</sup> The data were extracted and integrated using Crystals RED.<sup>6</sup> The structures were solved and refined by full-matrix least-squares calculations on  $F^2$  using JANA2006.<sup>7</sup> Molecular graphics were generated using Mercury 3.10.3.<sup>8</sup> CCDC deposition numbers for (*p*-H-POCOP)IrH<sub>2</sub> and (*p*-MeOOC-POCOP)IrH<sub>2</sub>-IC<sub>6</sub>F<sub>5</sub> are 2257556 and 2257557, respectively.

**Table S1.** Summary of X-ray crystallographic data.

| Compound                                           | ( <i>p</i> -H-POCOP)IrH <sub>2</sub>                                  | ( <i>p</i> -MeOOC-POCOP)IrH <sub>2</sub> -IC <sub>6</sub> F <sub>5</sub>                                                   |
|----------------------------------------------------|-----------------------------------------------------------------------|----------------------------------------------------------------------------------------------------------------------------|
| Chemical formula                                   | C <sub>22</sub> H <sub>41</sub> IrO <sub>2</sub> P <sub>2</sub>       | C <sub>30</sub> H <sub>43</sub> IrO <sub>4</sub> P <sub>2</sub> F <sub>6</sub> I                                           |
| Crystal system                                     | Monoclinic                                                            | Triclinic                                                                                                                  |
| Space group                                        | P 2 <sub>1</sub> /c                                                   | P -1                                                                                                                       |
| Temperature (K)                                    | 100                                                                   | 100                                                                                                                        |
| Cell parameters                                    | a=16.5349(16)<br>b=10.5849(9)<br>c=15.6632(12)<br>$\beta$ =115.113(8) | a = 10.6200(2)<br>b = 10.6749(2)<br>c=16.4369(3)<br>$\alpha$ =87.8506(15)<br>$\beta$ =84.0788(15)<br>$\gamma$ =68.7007(16) |
| Cell volume                                        | 2482.2(4)                                                             | 1726.87(6)                                                                                                                 |
| Z                                                  | 4                                                                     | 2                                                                                                                          |
| Crystal size                                       | 1 x 0.3 x 0.2 mm                                                      | 0.85 x 0.60 x 0.20 mm                                                                                                      |
| Radiation type                                     | X-ray                                                                 |                                                                                                                            |
| Wavelength                                         | 0.71073                                                               |                                                                                                                            |
| No of observed reflections                         | 22737                                                                 | 37775                                                                                                                      |
| No parameters                                      | 244                                                                   | 388                                                                                                                        |
| R(sigma)                                           | 0.045                                                                 | 0.0376                                                                                                                     |
| R1, wR2, Goof                                      | 0.0288, 0.0674, 1.320                                                 | 0.0310, 0.0669, 1.420                                                                                                      |
| R1 after Fourier merging, No of unique reflections | 3.91, 5891                                                            | 4.23, 8337                                                                                                                 |
| $\Delta\rho_{\max}$ , $\Delta\rho_{\min}$          | 1.80<br>-1.15                                                         | 1.21<br>-0.85                                                                                                              |

### 1.3 Neutron diffraction studies

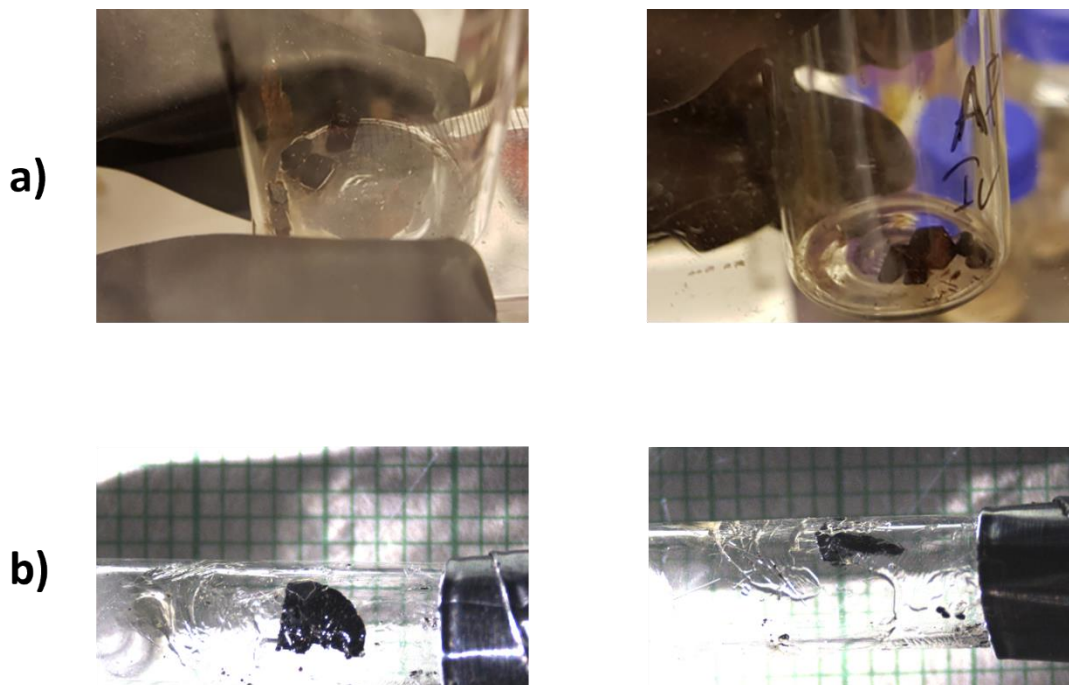

**Figure S1.** Images of the crystals grown and used for neutron diffraction. a) (*p*-H-POCOP)IrH<sub>2</sub>; b) (*p*-MeOOC-POCOP)IrH<sub>2</sub>---IC<sub>6</sub>F<sub>5</sub>.

Neutron diffraction data, for both (*p*-H-POCOP)IrH<sub>2</sub> and the (*p*-MeOOC-POCOP)IrH<sub>2</sub>-IC<sub>6</sub>F<sub>5</sub> adduct, were collected on the SXD instrument<sup>9</sup> at the ISIS Neutron and Muon Facility in Harwell (UK), using the time-of-flight (TOF) Laue diffraction method. A single crystal of (*p*-H-POCOP)IrH<sub>2</sub> of about 5 x 3 x 1 mm size was attached with aluminium tape on the tip of an aluminium pin and mounted on the central stick of a top-loading helium cryo-cooled refrigerating device (CCR). The sample chamber was first evacuated to 2 mbar and then filled with 200 mbar of He gas to ensure thermal conductivity. Bragg intensities were collected at 10, 100 and 295 K in a series of 5 angular orientations of the crystal around the vertical axis of the instrument with exposure times respectively of 5 h 50 min, 7 h and 11 h 30 min per orientation.

For the (*p*-MeOOC-POCOP)IrH<sub>2</sub>---IC<sub>6</sub>F<sub>5</sub> adduct, a single crystal of about 3 x 2 x 0.5 mm size was sealed in a quartz capillary under nitrogen atmosphere before being mounted on the sample stage of a bottom loading CCR. The sample chamber was evacuated and kept at 10<sup>-5</sup> bar for the duration of the experiment. Diffraction data were collected at 40 K in a series of 6 orientations with exposure time of ~14 h each. Cell dimensions for all structures and Bragg intensities were extracted

using the line-integral procedure implemented in the SXD2001 software.<sup>10</sup> Data were corrected for Lorentz effect but although the absorption neutron cross section for Iridium is quite big (425 barns at 1.78 Å) no absorption correction was applied. The starting model for the structural refinement was based on the atomic coordinates of the non-hydrogen atoms from the available X-ray structure, while all hydrogen atoms were located from neutron Fourier difference maps. All structures were refined by full matrix least squares on  $F^2$  using the SHELXL software.<sup>11</sup> In the (*p*-H-POCOP)IrH<sub>2</sub> structures, anisotropic displacement parameters (ADPs) were used for all atoms except for the hydrogens of the *tert*-butyl groups, which were refined using an isotropic group factor. Rotational disorder the –CH<sub>3</sub> groups of the *tert*-butyl units was observed for all structures but the limited amount of data available at those temperatures did not allow to refine a disordered model. Also due to the limited amount of data obtained for the (*p*-MeOOC-POCOP)IrH<sub>2</sub>---IC<sub>6</sub>F<sub>5</sub> adduct, the structure was refined with isotropic temperature factors for all atoms except for the hydride hydrogens. Experimental details for all structures are given in Table S2. All crystallographic data have been deposited with the joint Cambridge Crystallographic Data Centre and Fachinformationszentrum Karlsruhe database service. The data are provided free of charge to anybody who require them via [www.ccdc.cam.ac.uk/structures](http://www.ccdc.cam.ac.uk/structures). Reference numbers 2262956, 2262957, 2262958 and 2262955 refer respectively to the 10, 100, 295 K neutron data of (*p*-H-POCOP)IrH<sub>2</sub> and the 40 K neutron data of the (*p*-MeOOC-POCOP)IrH<sub>2</sub>---IC<sub>6</sub>F<sub>5</sub> adduct.

**Table S2.** Summary of neutron diffraction data.

|                  |                                                                 |                                                          |                                                          |                                                                                     |
|------------------|-----------------------------------------------------------------|----------------------------------------------------------|----------------------------------------------------------|-------------------------------------------------------------------------------------|
| Compound         | <i>(p</i> -H-POCOP)IrH <sub>2</sub>                             |                                                          |                                                          | <i>(p</i> -MeOOC-POCOP)IrH <sub>2</sub> --<br>-IC <sub>6</sub> F <sub>5</sub>       |
| Chemical formula | C <sub>22</sub> H <sub>41</sub> IrO <sub>2</sub> P <sub>2</sub> |                                                          |                                                          | C <sub>30</sub> H <sub>43</sub> IrO <sub>4</sub> P <sub>2</sub> F <sub>6</sub> I    |
| Crystal system   | Monoclinic                                                      |                                                          |                                                          | Triclinic                                                                           |
| Space group      | P 2 <sub>1</sub> /c                                             |                                                          |                                                          | P -1                                                                                |
| Temperature (K)  | 10                                                              | 100                                                      | 295                                                      | 40                                                                                  |
| Cell parameters  | a=16.656(9)<br>b=10.538(5)<br>c=15.607(8)<br>β=114.75(2)        | a=16.639(9)<br>b=10.593(5)<br>c=15.698(8)<br>β=114.88(2) | a=16.607(9)<br>b=10.791(5)<br>c=15.985(8)<br>β=115.99(2) | a=10.644(9)<br>b=10.798(5)<br>c=16.580(8)<br>α=88.31(2)<br>β=84.52(2)<br>γ=68.64(2) |
| Cell volume      | 2487.7(1)                                                       | 2510.2(1)                                                | 2594.7(1)                                                | 1766.5(1)                                                                           |

|                                                    |                             |                             |                             |                         |
|----------------------------------------------------|-----------------------------|-----------------------------|-----------------------------|-------------------------|
| Z                                                  | 4                           |                             |                             | 2                       |
| Crystal size                                       | 5 x 3 x 1 mm                |                             |                             | 3 x 2 x 0.5 mm          |
| Radiation type                                     | Neutron                     |                             |                             |                         |
| Wavelength                                         | Polychromatic, 0.35 – 6.5 Å |                             |                             |                         |
| No of observed reflections<br>[[I>1σ(I)]]          | 12934                       | 8220                        | 4122                        | 3008                    |
| No parameters                                      | 438                         | 439                         |                             | 218                     |
| R(sigma)                                           | 0.1071                      | 0.0933                      | 0.0614                      | 0.1397                  |
| R1, wR2, Goof                                      | 0.0962,<br>0.2382,<br>1.037 | 0.1010,<br>0.2501,<br>1.101 | 0.1241,<br>0.3070,<br>1.469 | 0.1648<br>0.3783, 1.603 |
| R1 after Fourier merging, No of unique reflections | 0.0907, 6689                | 0.0994, 4030                | 0.1246, 1824                | 0.1941, 1591            |
| Δρ <sub>max</sub> , Δρ <sub>min</sub>              | 3.26, -3.33                 | 1.99, -2.27                 | 0.94, -1.04                 | 2.11, -1.37             |
| Extinction coeff.                                  | 0.0006(1)                   | 0.0005(1)                   | 0.0021(3)                   | 0.0004(1)               |

#### 1.4. Analysis of thermal motion in (*p*-H-POCOP)IrH<sub>2</sub>

The large ADP values refined for the hydride hydrogens in the (*p*-H-POCOP)IrH<sub>2</sub> structure at all temperatures (see Figure 2 in the manuscript) and the huge standard deviations on the Ir-H distance at 295 K (see Table S3) are a strong indication of a large internal vibrations of these hydrogens. In order to get a better insight of the dynamics of the molecule in the crystal, we have performed a normal coordinate analysis of the ADP's according to the Bürgi and Capelli method,<sup>12</sup> as implemented in the program NKA.<sup>13</sup>

A unique set of normal modes was used to describe the ADP's at all temperatures. The molecular coordinate system used in the analysis had the x-axis bisecting the plane of the benzene ring in the C4-C1 direction, the y-axis along the P1-P2 direction and the z-axis completing a Cartesian right-handed coordinate system. The disordered –CH<sub>3</sub> groups of the *tert*-butyl units were not included in the calculations. The initial model of motion consisted of the six rigid-body degrees of freedom (three translations and three librations) for which six frequencies were refined. Four additive tensors were also refined to account to the high-frequency internal vibrations (such as bending and



stretching): one tensor to account for all atoms in the ligand molecular plane (C1 to C6, P1, P2, O1, O2 and Ir1), one for the linking C atoms in the *tert*-butyl group (C7, C11, C15, C19), one for the hydrogens attached to the benzene ring and one for the two hydride hydrogens. Although the molecule sits in the crystal in general position, it shows  $C_{2v}$  point symmetry and therefore the following restraints were used for the coupling of the different components:  $L_y$  and  $T_z$  were allowed to mix, as well as  $L_z$  and  $T_y$ , while  $L_x$  and  $T_x$  were refined as single-component vectors. A total of 66 parameter with 35 restraints were refined from 360 observations for the rigid-body model, resulting in an agreement factor of 27% and a goodness of fit of 1.43. The frequency for each normal mode refined to the following values:  $L_x = 65(8)$ ,  $97\%L_y+3\%T_z = 52(3)$ ,  $L_z = 60(8)$ ,  $T_x = 26(1)$ ,  $T_y = 25(1)$ ,  $97\%T_z+3\%L_y = 21(1)$   $\text{cm}^{-1}$ . The tensorial component  $\epsilon_{33}$  accounting for high frequency motions of the hydride hydrogens in the direction perpendicular to the Ir-H bond and out of the molecular plane of the ligand refined to  $0.0617(33)$   $\text{\AA}^2$ , a value almost three times as big as what can be computed from spectroscopy for the internal motions of these hydrogens (see Table 1 in ref. 14). In order to introduce more flexibility in the model of motion, an additional in-phase libration of the hydride hydrogens about an axis passing through the Ir atoms and parallel to the P1-P2 direction was introduced. Due to its symmetry, this mode is allowed to couple with  $L_y$  and  $T_z$ . No additional frequency has been refined but only two additional vector components were added to the model of motion. The analysis showed that the  $H_2$  libration contributes about 7% of the  $L_y$  frequency ( $51(3)$   $\text{cm}^{-1}$ ), bringing the  $\epsilon_{33}$  for the hydride hydrogens to a more reasonable value of  $0.0382(63)$   $\text{\AA}^2$  (final agreement 26%, Goof 1.38). Bond distances corrected for the  $H_2$  librations are given in Table S3, together with the amplitude of the librational motion. The atomic positions corrected for the effect of libration, allowed to determine an increase of the  $r(\text{H-H})$  with temperature of about  $0.05$   $\text{\AA}$  in the 10-295 K range.

**Table S3.** Temperature dependence of the bond lengths of the hydride core from the neutron diffraction measurements (top) and after correction for libration (bottom) using the results of the Normal Coordinate Analysis of the multi-temperature Anisotropic Displacement Parameters.

|                                        | <i>(p</i> -H-POCOP)IrH <sub>2</sub> |                     |                     | <i>(p</i> -MeOOC-POCOP)IrH <sub>2</sub> --IC <sub>6</sub> F <sub>5</sub> |
|----------------------------------------|-------------------------------------|---------------------|---------------------|--------------------------------------------------------------------------|
| Temperature (K)                        | 10                                  | 100                 | 295                 | 40                                                                       |
| Ir – H1 (Å)                            | 1.616 (7)<br>1.621                  | 1.609 (10)<br>1.625 | 1.608 (24)<br>1.653 | 1.656 (39)                                                               |
| Ir – H2 (Å)                            | 1.605 (9)<br>1.610                  | 1.580 (14)<br>1.596 | 1.616 (35)<br>1.661 | 1.521 (89)                                                               |
| H1-H2 (Å)                              | 1.425(14)<br>1.429                  | 1.436(22)<br>1.448  | 1.438(55)<br>1.478  | 2.230 (64)                                                               |
| H1 .... I1 (Å)                         |                                     |                     |                     | 2.514 (58)                                                               |
| H <sub>2</sub> libration amplitude (°) | 3.84                                | 6.63                | 11.4                |                                                                          |

## 2. Additional NMR data

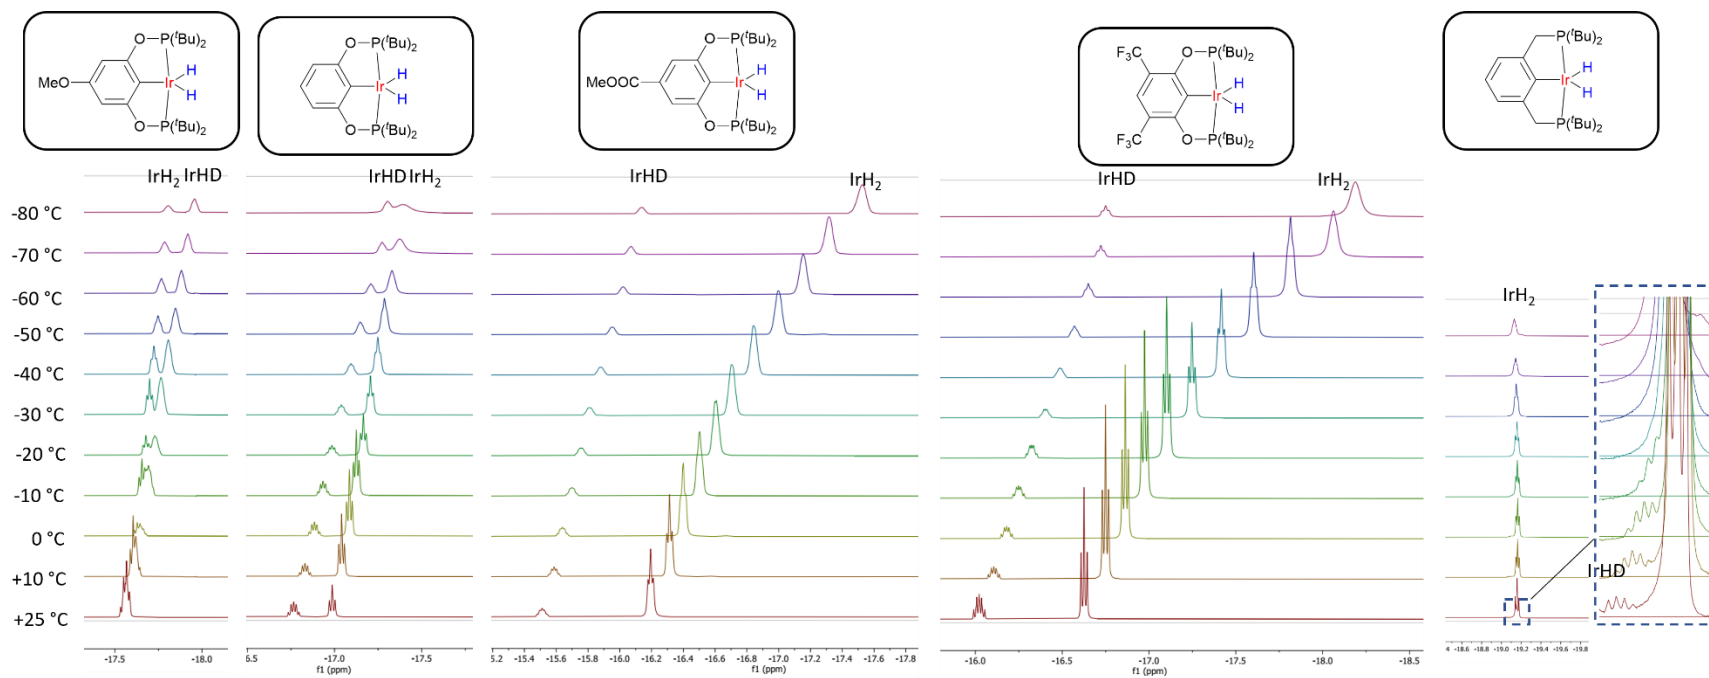

**Figure S2.** Variable temperature  $^1\text{H}$  NMR spectra of (X-POCOP)IrH<sub>2</sub> and (PCP)IrH<sub>2</sub> in toluene-*d*<sub>8</sub>, the hydride region is shown.

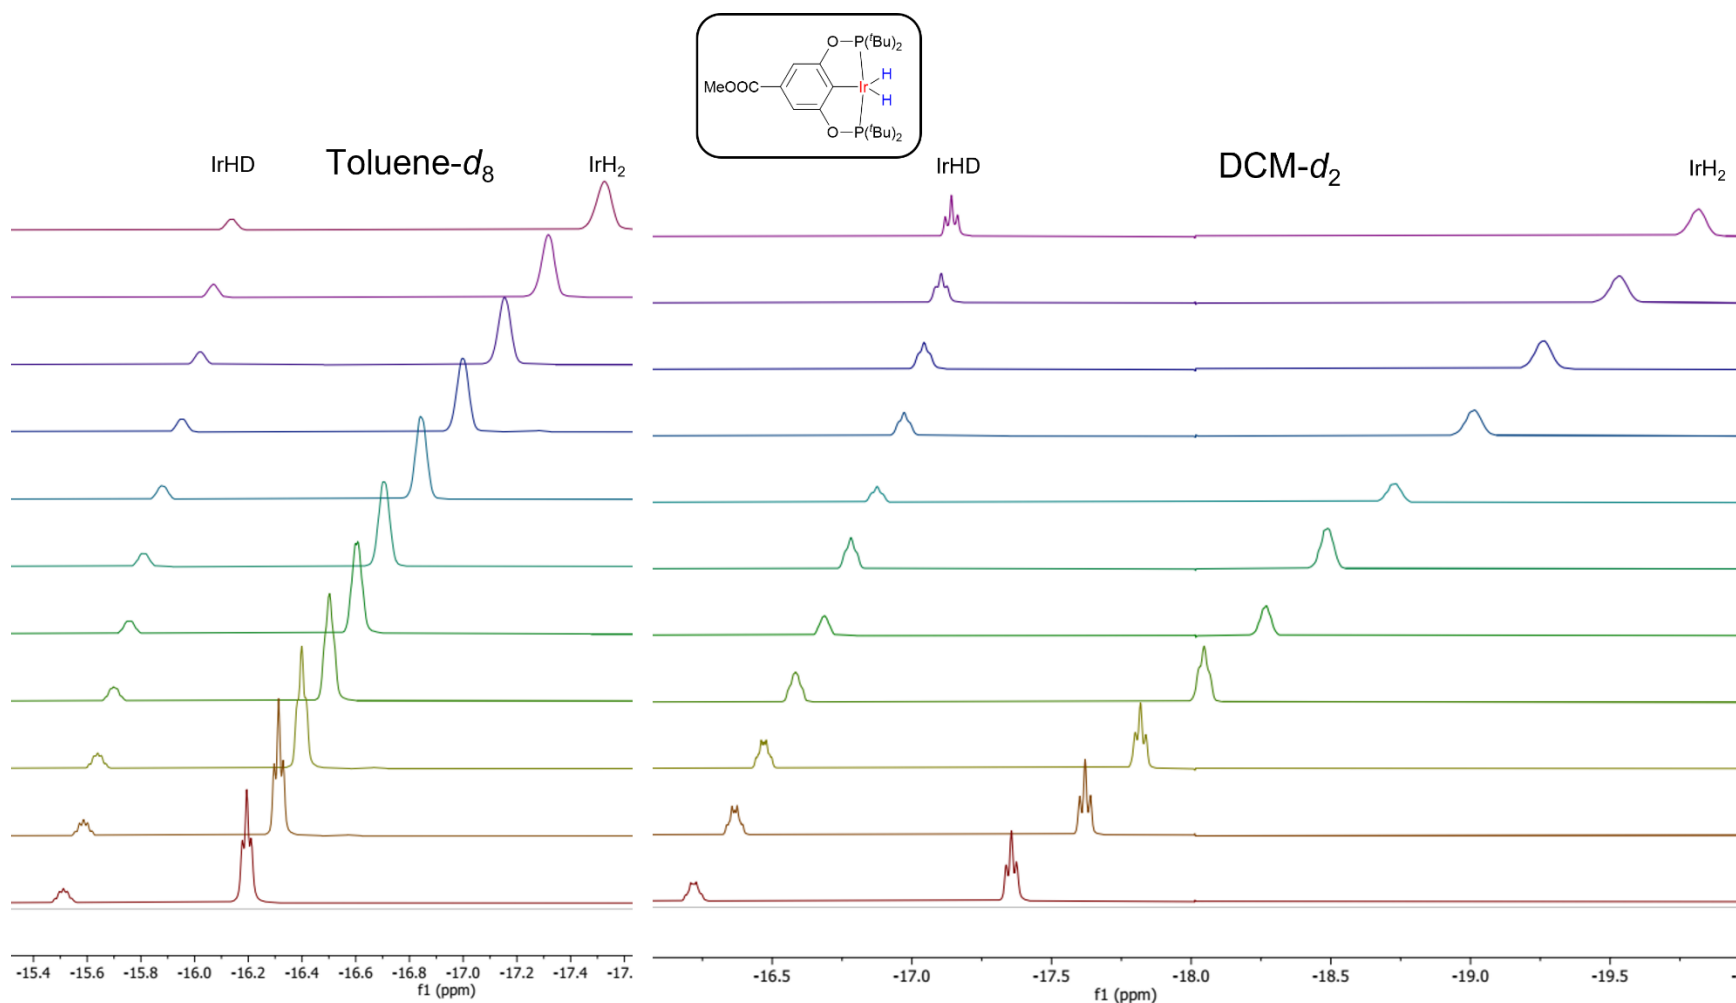

**Figure S3.** Variable temperature  $^1\text{H}$  NMR spectra of (p-MeOOC-POCOP) $\text{IrH}_2$  in toluene- $d_8$  and  $\text{CD}_2\text{Cl}_2$ . It can be seen that in solvent with higher acceptor number ( $\text{CD}_2\text{Cl}_2$ ),  $\text{IrH}_2$  and  $\text{IrHD}$  resonances are discriminated. Due to smaller dipolar coupling with deuterium,  $\text{IrHD}$  signal linewidth is smaller and it appears as a sharp triplet, while  $\text{IrH}_2$  gives broad singlet. Similar trend is observed for toluene- $d_8$ , but due to smaller  $r(\text{H-H})$ , although  $\text{IrHD}$  signals has smaller linewidth compared to  $\text{IrH}_2$ , the multiplet is not resolved.

**Table S4.** Selected NMR data on (X-POCOP)IrH<sub>2</sub> and (PCP)IrH<sub>2</sub> in toluene-*d*<sub>8</sub>, CD<sub>2</sub>Cl<sub>2</sub> and THF-*d*<sub>8</sub>.

|                             | Toluene         |       | CD <sub>2</sub> Cl <sub>2</sub> |       | Toluene         |       | CD <sub>2</sub> Cl <sub>2</sub> |       | Toluene         |       | CD <sub>2</sub> Cl <sub>2</sub> |       | Toluene         |       | CD <sub>2</sub> Cl <sub>2</sub> |       | Toluene         |       |  |  |
|-----------------------------|-----------------|-------|---------------------------------|-------|-----------------|-------|---------------------------------|-------|-----------------|-------|---------------------------------|-------|-----------------|-------|---------------------------------|-------|-----------------|-------|--|--|
| T, °C                       | J <sub>HD</sub> | Δδ    | J <sub>HD</sub>                 | Δδ    | J <sub>HD</sub> | Δδ    | J <sub>HD</sub>                 | Δδ    | J <sub>HD</sub> | Δδ    | J <sub>HD</sub>                 | Δδ    | J <sub>HD</sub> | Δδ    | J <sub>HD</sub>                 | Δδ    | J <sub>HD</sub> | Δδ    |  |  |
| 25                          | 5.81            | -0.01 | 5.2                             | -0.12 | 6.95            | -0.22 | ca.5                            | -0.52 | 7.2             | -0.68 | 5.1                             | -1.14 | 6.9             | -0.61 | n/r                             | -0.87 | 7.6             | -0.12 |  |  |
| 10                          | 5.75            | 0.01  | -                               | -     | 6.9             | -0.21 | -                               | -     | -               | -0.73 | 4.7                             | -1.25 | 6.7             | -0.64 | 5.2                             | -0.96 | 7.6             | -0.09 |  |  |
| 0                           | 5.67            | 0.02  | 4.9                             | -0.1  | 6.8             | -0.2  | ca.4.8                          | -0.6  | 6.8             | -0.76 | 4.2                             | -1.35 | 6.3             | -0.68 | 4.7                             | -1.05 | 7.5             | -0.07 |  |  |
| -10                         | 5.48            | 0.03  | 4.8                             | -0.1  | 6.6             | -0.19 | -                               | -     | 6.5             | -0.81 | ca.3.3                          | -1.47 | 6.1             | -0.72 | 4.2                             | -1.14 | 7.5             | -0.04 |  |  |
| -20                         | ca.5.15         | 0.05  | n/r                             | -0.09 | 6.5             | -0.17 | ca.4.3                          | -0.69 | 6.1             | -0.85 | n/r                             | -1.58 | 5.3             | -0.78 | 3.7                             | -1.3  | n/r             | n/r   |  |  |
| -30                         | n/r             | 0.06  | n/r                             | -0.09 | 6.3             | -0.17 | -                               | -     | 5.7             | -0.89 | n/r                             | -1.71 | 5.3             | -0.85 | 3.1                             | -1.44 | n/r             | n/r   |  |  |
| -40                         | n/r             | 0.09  | n/r                             | -0.07 | 5.9             | -0.16 | n/r                             | -0.79 | 5.4             | -0.96 | n/r                             | -1.85 | ca.5            | -0.93 | n/r                             | -1.62 | n/r             | n/r   |  |  |
| -50                         | n/r             | 0.1   | n/r                             | -0.07 | n/r             | -0.14 | -                               | -     | n/r             | -1.04 | n/r                             | -2.04 | n/r             | -1.03 | n/r                             | -1.84 | n/r             | 0.08  |  |  |
| -60                         | n/r             | 0.11  | n/r                             | -0.06 | n/r             | -0.12 | n/r                             | -0.93 | n/r             | -1.13 | n/r                             | -2.22 | n/r             | -1.17 | n/r                             | -2.11 | -               | -     |  |  |
| -70                         | n/r             | 0.13  | n/r                             | -0.06 | n/r             | -0.1  | -                               | -     | n/r             | -1.24 | n/r                             | -2.43 | n/r             | -1.34 | n/r                             | -2.45 | -               | -     |  |  |
| -80                         | n/r             | 0.15  | n/r                             | -0.06 | n/r             | -0.09 | n/r                             | -1.18 | n/r             | -1.36 | n/r                             | -2.68 | n/r             | -1.44 | n/r                             | -2.64 | -               | -     |  |  |
| <i>T</i> <sub>1</sub> (min) | 0.129           |       | 0.150                           |       | 0.120           |       | -                               |       | 0.174           |       | 0.463                           |       | 0.174           |       | 0.339                           |       | 0.094           |       |  |  |
|                             | THF             |       |                                 |       | THF             |       |                                 |       |                 |       |                                 |       |                 |       |                                 |       |                 |       |  |  |
| T, °C                       | J <sub>HD</sub> | Δδ    |                                 |       | J <sub>HD</sub> | Δδ    |                                 |       |                 |       |                                 |       |                 |       |                                 |       |                 |       |  |  |
| 25                          | 5.89            | -0.01 |                                 |       | 6.88            | -0.21 |                                 |       |                 |       |                                 |       |                 |       |                                 |       |                 |       |  |  |
| 10                          | 5.62            | n/r   |                                 |       | -               | -     |                                 |       |                 |       |                                 |       |                 |       |                                 |       |                 |       |  |  |
| 0                           | 5.51            | 0.03  |                                 |       | 6.56            | -0.19 |                                 |       |                 |       |                                 |       |                 |       |                                 |       |                 |       |  |  |
| -10                         | 5.51            | 0.04  |                                 |       | 6.55            | -0.18 |                                 |       |                 |       |                                 |       |                 |       |                                 |       |                 |       |  |  |
| -20                         | 5.15            | 0.06  |                                 |       | ca.5.9          | -0.17 |                                 |       |                 |       |                                 |       |                 |       |                                 |       |                 |       |  |  |
| -30                         | 5.06            | 0.07  |                                 |       | -               | -     |                                 |       |                 |       |                                 |       |                 |       |                                 |       |                 |       |  |  |
| -40                         | ca.4.8          | 0.09  |                                 |       | n/r             | -0.14 |                                 |       |                 |       |                                 |       |                 |       |                                 |       |                 |       |  |  |
| -50                         | n/r             | 0.11  |                                 |       | n/r             | -0.12 |                                 |       |                 |       |                                 |       |                 |       |                                 |       |                 |       |  |  |
| -60                         | n/r             | 0.12  |                                 |       | n/r             | -0.11 |                                 |       |                 |       |                                 |       |                 |       |                                 |       |                 |       |  |  |
| -70                         | n/r             | 0.14  |                                 |       | n/r             | -0.08 |                                 |       |                 |       |                                 |       |                 |       |                                 |       |                 |       |  |  |
| -80                         | n/r             | 0.16  |                                 |       | -               | -     |                                 |       |                 |       |                                 |       |                 |       |                                 |       |                 |       |  |  |
| <i>T</i> <sub>1</sub> (min) | 0.127           |       |                                 |       | <0.140          |       |                                 |       |                 |       |                                 |       |                 |       |                                 |       |                 |       |  |  |

Notes: 1) n/r refers to not resolved. 2) A few *J*<sub>HD</sub>-s with magnitude of changes ≤1 Hz are given with two digits after dot.

### 3. Fitting of $^1\text{H}$ NMR chemical shifts and $J_{\text{HD}}$ coupling constants

#### 3.1 Accuracy of coupling constant measurement

An accuracy of coupling constant measurement of  $\pm 0.2$  Hz (and even better with the help of spin simulations) is reasonable for a well-resolved  $^1\text{H}$  or  $^1\text{H}\{^3\text{P}\}$  spectra. However, this estimate does not hold when significant broadening of lines is observed. The effect of linewidth of a signal on splitting between the lines within that signal (or on “observed”  $J$  in other words) appears highly relevant to the phenomena of temperature-dependent  $J_{\text{HD}}$ . A simple simulation of a triplet with  $J = 8$  Hz indicates that when the linewidth exceeds  $\sim 50\%$  of  $J$ , the observed coupling can be smaller than the real coupling by up to 1 Hz. Thus, we suppose that  $J$ -s, in particular  $J_{\text{HD}}$ -s that are measured in signals with broad lines are systematically underestimated. In the experimental spectra neither apodisation functions, nor line-shape analysis or empirical corrections using Table S5 data regression were found to accurately recover “real”  $J$ -s.

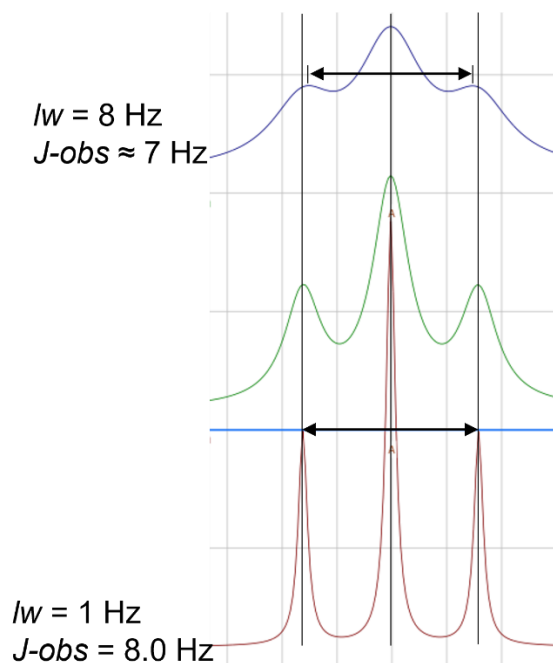

**Figure S4.** Simulated dependence of  $J_{\text{obs}}$  on a signal linewidth for a triplet with  $J = 8.0$  Hz.

**Table S5.** Dependence of  $J$ -obs on a signal linewidth for a triplet with  $J = 8.0$  Hz. MestreNova simulation, 10...-20 ppm, 64 K, 500 MHz. Peak separation measured manually.

| Linewidth, Hz | $J$ -obs, Hz |
|---------------|--------------|
| 0.5           | 8.0          |
| 1             | 8.0          |
| 2             | 8.0          |
| 3             | 8.0          |
| 4             | 7.97         |
| 5             | 7.88         |
| 6             | 7.79         |
| 7             | 7.51         |
| 8             | ~7           |

A representative practical example of the above-discussed effect is given on Figure S5. When  ${}^2J_{\text{PH}}$  in partially deuterated (*m*-bis-CF<sub>3</sub>-POCOP)IrH<sub>2</sub> is followed by <sup>1</sup>H NMR, initially the coupling constant is growing upon decreasing temperature, consistent with the **S-NS** equilibria being shifted towards **NS**, that has higher  ${}^2J_{\text{PH}}$  (see the main text, Figure 5 in particular, for discussion). An unexpected decay of  ${}^2J_{\text{PH}}$  is then observed below -20 °C. Examination of the linewidth of IrH<sub>2</sub> resonance indicates that at those temperatures the linewidth is comparable to the coupling, which in agreement with Table S5 data causes overlap of lines and decay of the observed splitting. While IrH<sub>2</sub> resonance is further broadened due to strong H---H dipole-dipole interactions, IrHD resonance is broadened to a lesser extent and clearly indicates that the “real”  ${}^2J_{\text{PH}}$  keeps growing.

Alternative interpretations of Figure S5 such as isotope perturbation of coupling constant seem unlikely to us. Firstly, in well-resolved resonances  ${}^2J_{\text{PH}}$  measured in IrH<sub>2</sub> signal matches the one measured in IrHD signal, thus ruling out a high secondary “intrinsic” isotope effect. Secondly, although certainly there is a non-statistical occupation of hydride sites by deuterium in **NS** structures, coupling constants for apical and equatorial positions are virtually the same (i.e. -8.94 and -8.95 Hz for  $r(\text{H-H}) = 2.2 \text{ \AA}$ ) according to calculations. Thirdly, it is possible that deuterium favors **NS** over **S** and within the IrHD signal the relative weight of **NS** (with supposedly higher  ${}^2J_{\text{PH}}$ ) is higher than in IrH<sub>2</sub> signal. Such deuterium distribution might affect the accuracy of measurement, but at the same time it will only make sense if there is a compound with higher  ${}^2J_{\text{PH}}$  present, so it anyway will not change the conclusions regarding **S-NS** model.

The same issue is undoubtedly relevant to  $J_{\text{HD}}$  as well. In all (X-POCOP)IrH<sub>2</sub> complexes IrHD resonance becomes significantly more broad at low temperatures, and the raw “observed”  $J_{\text{HD-S}}$  are systematically underestimated. The  $J_{\text{HD-S}}$  used for simulations are extracted using resolution enhancement and spin simulations to improve accuracy, but this is less accurate than the direct measurement and we cannot completely rule out that a small underestimation is still present.

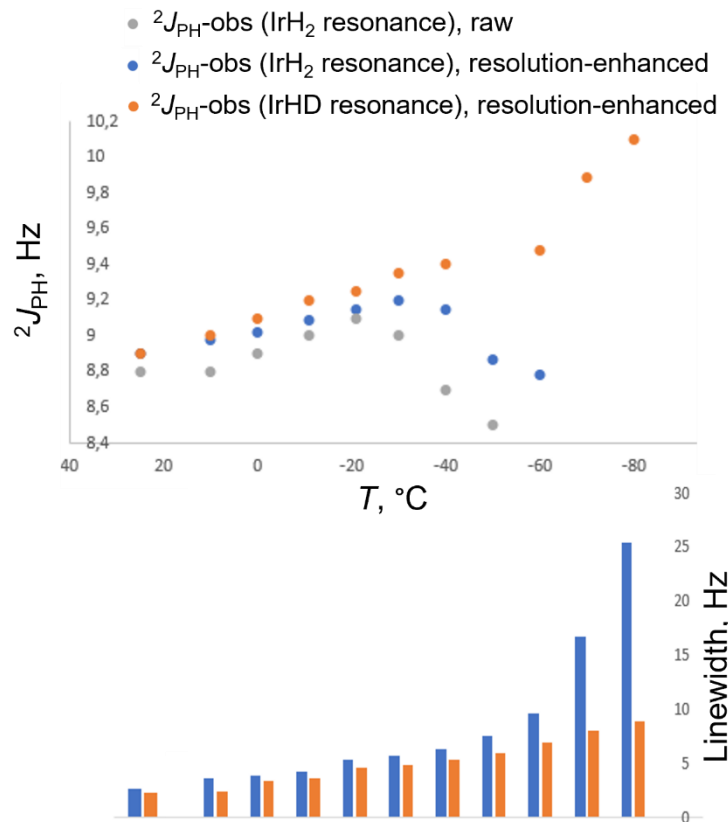

**Figure S5.** Top: temperature dependence of an “observed”  ${}^2J_{\text{PH}}$  in partially deuterated (*m*-bis-CF<sub>3</sub>-POCOP)IrH<sub>2</sub> measured at IrH<sub>2</sub> (grey dots) resonances, as well as at IrH<sub>2</sub> (blue dots) and IrHD (orange dots) resonances with resolution enhancement. Bottom: selected linewidths of IrH<sub>2</sub> and IrHD resonances measured in  ${}^1\text{H}\{{}^{31}\text{P}\}$  NMR spectra of the same complex. It can be seen that when linewidth approaches  ${}^2J_{\text{PH}}$  value,  ${}^2J_{\text{PH-obs}}$  undergoes decrease that cannot be fully repaired with resolution enhancement.

### 3.2 Accuracy of fitting

All observed NMR spectra of (X-POCOP)IrH<sub>2</sub> can be successfully fitted with the two-component model (**S** and **NS**), augmented with **NS-bound** (**S**, **NS** and **NS-bound**) in some cases. We suppose that the fittings performed well capture the key processes responsible for the observed spectral changes over the range of temperature. At the same time, the fitted limiting chemical shifts and thermodynamic parameters have comparatively high uncertainties. This is because in some spectra no plateauing is observed and the datasets are thus somewhat degenerate. There are multiple dynamic processes that can affect the chemical shifts and the lineshape of (X-POCOP)IrH<sub>2</sub> such as exchange with traces of dissolved hydrogen or deuterium scrambling with NMR solvents. Although care has been taken to minimize the effects of those, a small additional uncertainty cannot be completely ruled out. A special note shall be made regarding fitting of  ${}^{31}\text{P}$  NMR spectra.  ${}^{31}\text{P}$  NMR signals in general are known to be highly temperature dependent. It could be that rotation of *tert*-butyl groups and similar processes have higher impact on  ${}^{31}\text{P}$  NMR chemical shifts compared to **S-NS** equilibria. Therefore, although in some cases  ${}^{31}\text{P}$  NMR spectra were fitted to



illustrate that they do not contradict the model, the resulting limiting chemical shifts cannot be deemed as reliable.

### 3.3 Fitting procedures

For the two-component model the data was fitted to the standard equation:

$$X(i)_{\text{obs}} = X(i)_A / (1 + e^{(-\Delta H/RT + \Delta S/R)}) + X(i)_B \times e^{(-\Delta H/RT + \Delta S/R)} / (1 + e^{(-\Delta H/RT + \Delta S/R)})$$

where  $X(i)$  are  $\delta$ ,  ${}^2J_{\text{PH}}$  and  $J_{\text{HD}}$ .

For more complex models with sophisticated analytical solutions,  $X(i)_{\text{obs}}$  were numerically processed to obtain  $K$  with guess values of  $X(i)_A$ ,  $X(i)_B$ , etc. for each temperature, and then the sum of least square errors over the whole temperature range was minimized with  $X(i)_A$ ,  $X(i)_B$ , etc. as parameters.

### 3.4 Model chemistry

We have attempted different model chemistries to fit temperature dependencies of NMR spectra of the iridium hydrides studied. A simple two-component model

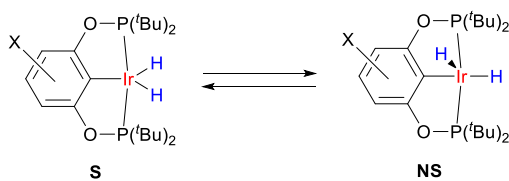

gives good fit of  $(X\text{-POCOP})\text{IrH}_2$  with electron-withdrawing groups, and when the effect of linewidth on  $J_{\text{HD}}$  is carefully addressed, for  $(X\text{-POCOP})\text{IrH}_2$  with electron-donating groups as well. Isotope effects on chemical shifts are rationalized through non-statistical occupation of apical and equatorial sites in **NS** by deuterium for  $(X\text{-POCOP})\text{IrH}_2$  with electron-withdrawing groups.

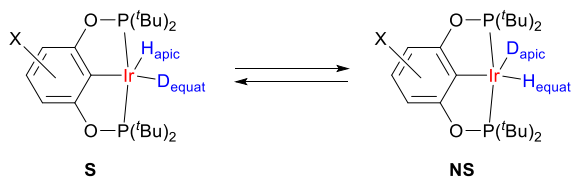

For  $(X\text{-POCOP})\text{IrH}_2$  with electron-donating groups, isotope effects on chemical shifts are rationalized through non-statistical distribution of deuterium between **S** and **NS** structures, or in other words, the slight preference of deuterium to occupy sites in **NS** compared to **S**. An alternative model may involve **S** that is lower than **NS** and the presence of **S-bound** that accounts for a small up-field shift of  $\delta(\text{IrH}_2)$  at low  $T$ . Because the changes observed are small, a fully unambiguous choice is not possible.

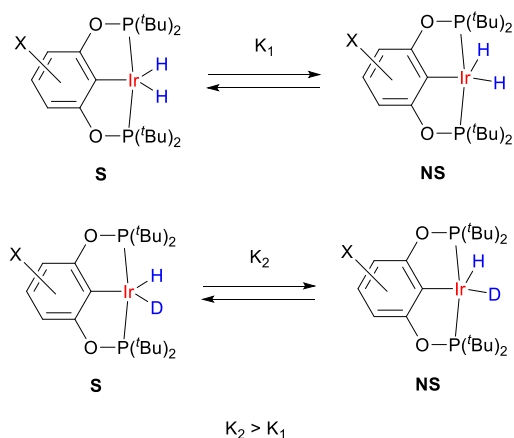

### 3.5 Complex (*m*-bis-CF<sub>3</sub>-POCOP)IrH<sub>2</sub> in toluene-*d*<sub>8</sub>:

<sup>1</sup>H and <sup>31</sup>P chemical shifts, as well as  $J_{\text{HD}}$  and  ${}^2J_{\text{PH}}$  were fitted simultaneously without restrictions. Pleasingly, **S**- $J_{\text{HD}}$  of 9.6 Hz well matches the value that can be calculated from  $r(\text{H-H})$  in (*p*-H-POCOP)IrH<sub>2</sub> determined by neutron diffraction (1.43 Å, 8.9 Hz). **NS**- $J_{\text{HD}}$  of 0.1 Hz has no reliable comparison, but is in the expected range (-3 to 3 Hz). **NS**- ${}^2J_{\text{PH}}$  of 11.4 Hz is smaller than the related coupling in fully square-pyramidal (X-POCOP)IrHCl (12.5-13.5 Hz). Hence, it is likely that **NS** geometry is in between trigonal-bipyramidal **S** and square-pyramidal (X-POCOP)IrHCl, closer to the latter. It will be shown further on that halogen-bonded adducts with C<sub>6</sub>F<sub>5</sub>I are even more de-symmetrized. If  ${}^2J_{\text{PH}}$  is kept constrained to 12.9 Hz (that is the value for (*m*-bis-CF<sub>3</sub>-POCOP)IrHCl) during fitting, the fitting is converged to **S**- $J_{\text{HD}}$  of 12.1 Hz which seems an overestimate (corresponds to  $r(\text{H-H})$  1.3 Å).

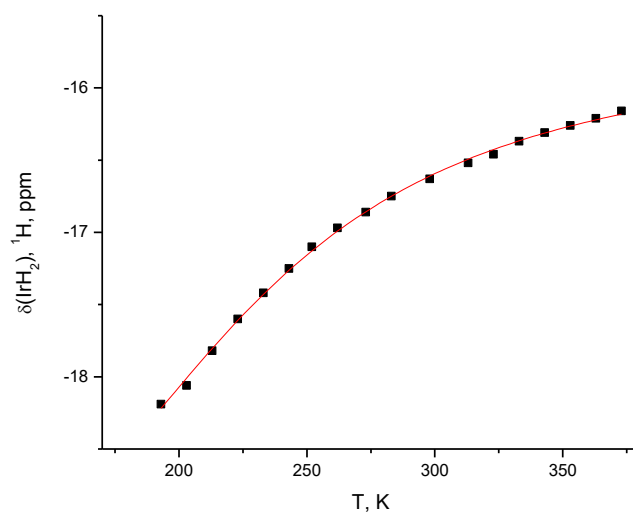

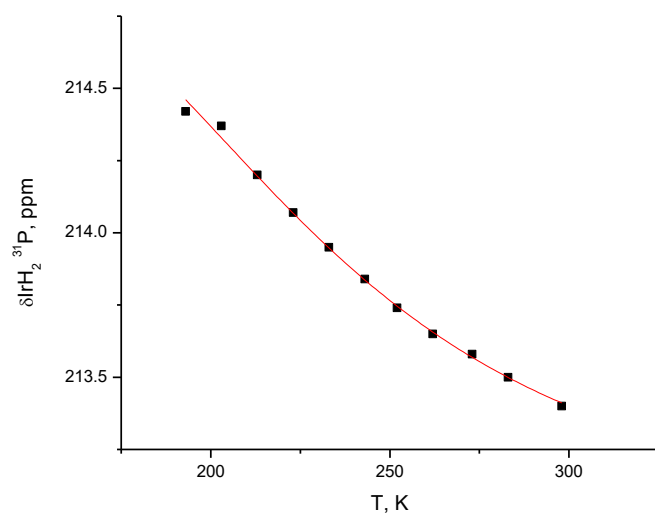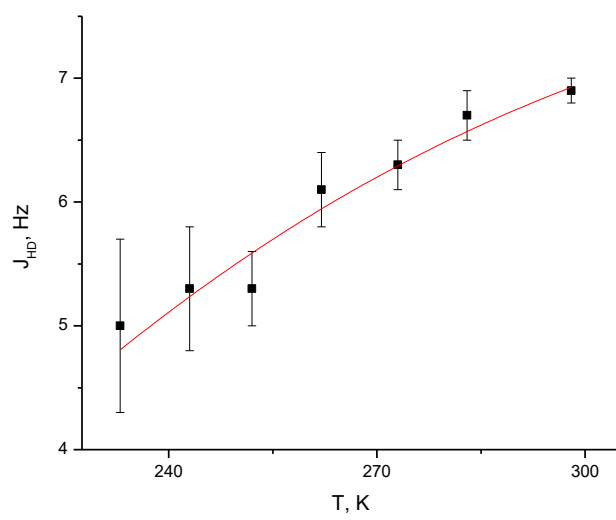

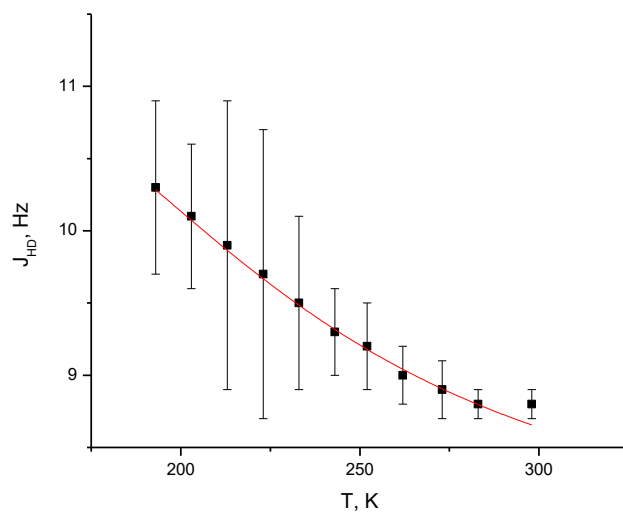

**Figure S6.** A two-component model (**S** and **NS**) fit of variable temperature NMR spectra of (*m*-bis-CF<sub>3</sub>-POCOP)IrH<sub>2</sub> toluene-*d*<sub>8</sub>. <sup>1</sup>H and <sup>31</sup>P chemical shifts, as well as  $J_{HD}$  and  ${}^2J_{PH}$  are fitted.

### 3.6 Complex (*p*-MeOOC-POCOP)IrH<sub>2</sub> in toluene-*d*<sub>8</sub>:

${}^2J_{PH}$  was not fitted due to small amount of accurate data points

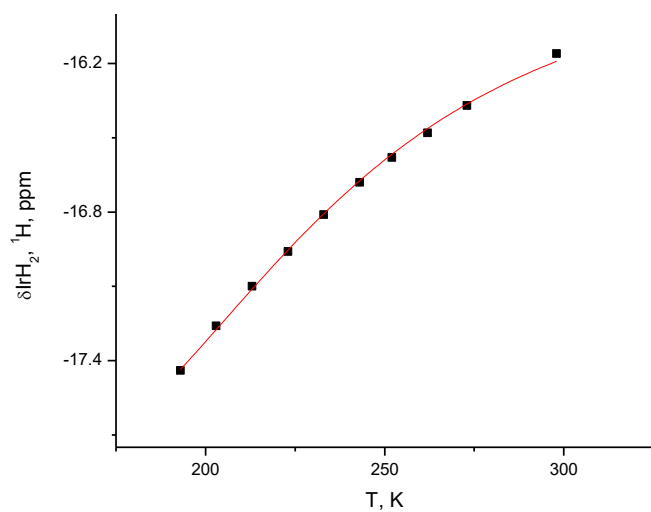

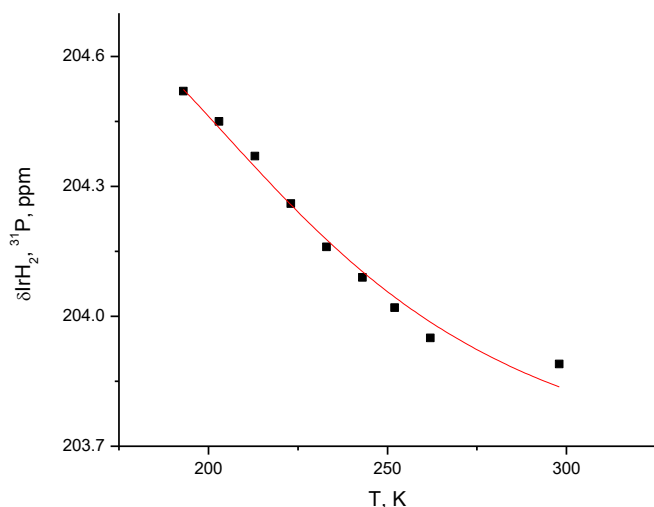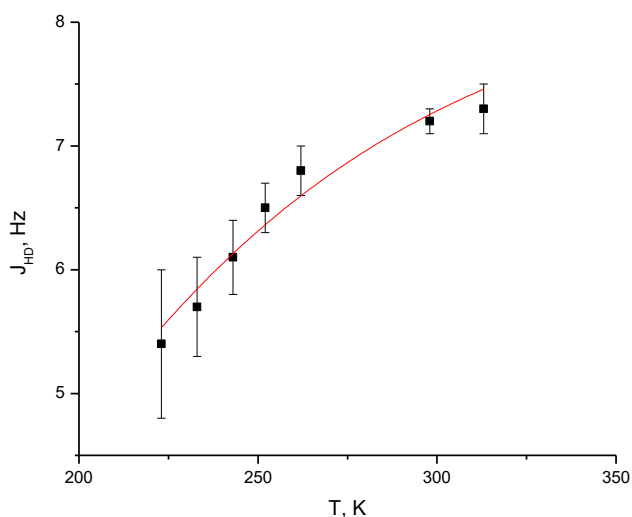

**Figure S7.** A two-component model (S and NS) fit of variable temperature NMR spectra of (*p*-MeOOC-POCOP)IrH<sub>2</sub> toluene-*d*<sub>8</sub>. <sup>1</sup>H and <sup>31</sup>P chemical shifts, as well as  $J_{\text{HD}}$  are fitted.

### 3.7 Complexes (*p*-H-POCOP)IrH<sub>2</sub> and (*p*-MeO-POCOP)IrH<sub>2</sub> in toluene-*d*<sub>8</sub>: notes

For these compounds reliable fitting is complicated since change of  $\delta$  in <sup>1</sup>H NMR over +25...-80 °C is much smaller and does not exceed 0.4 ppm, which is in fact comparable to changes of  $\delta$  in (*p*-H-POCOP)IrHCl (ca. 0.3 ppm). The latter complex is unlikely to be involved in any well-defined equilibria or interactions. Also, no signs of plateauing are observed in the spectra of (*p*-H-POCOP)IrH<sub>2</sub> and (*p*-MeO-POCOP)IrH<sub>2</sub>.

The apparent <sup>2</sup> $J_{\text{PH}}$  seem to decrease with temperature in both compounds from 8.2-8.1 to <7.7 Hz, however, when the effect of line broadening is taken into account, only ca. 0.1 Hz changes are left, that are in fact less than the confidence interval. It is clear, at the same time, that unlike complexes

with X= *m*-bis-CF<sub>3</sub> and MeOOC-, <sup>2</sup>J<sub>PH</sub> does not indicate major structural changes happening. An accurate measurement of J<sub>HD</sub> is not possible due to broad lines, however a decrease of ca. 0.5-1 Hz (after addressing the linewidth) seemingly takes place.

To deal with partial degeneracy of the data, we used <sup>1</sup>H and <sup>31</sup>P chemical shifts jointly with isotope effects aiming at R<sup>2</sup>≈99 for van't Hoff plots for both. Subsequently, the resulting ΔH and ΔS were used to fit J<sub>HD</sub>. We thus report a possible, but perhaps not a univocal solution. The uncertainties are not possible to estimate. As noted above, there could be an alternative solution using **S/S-bound/NS** model.

### 3.8 Complex (*p*-H-POCOP)IrH<sub>2</sub> in toluene-*d*<sub>8</sub>:

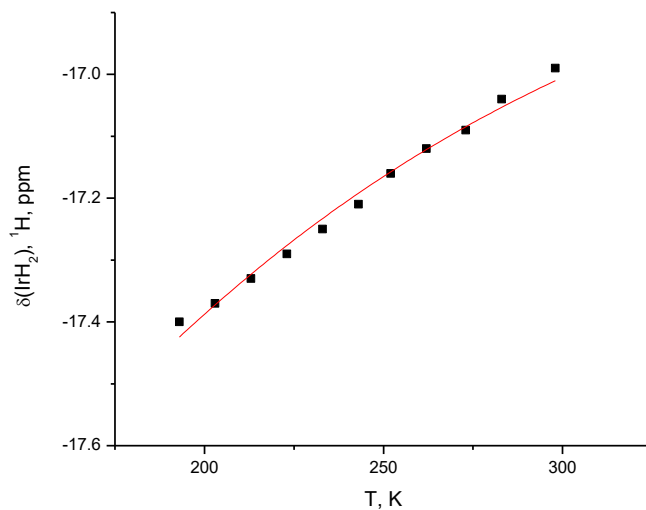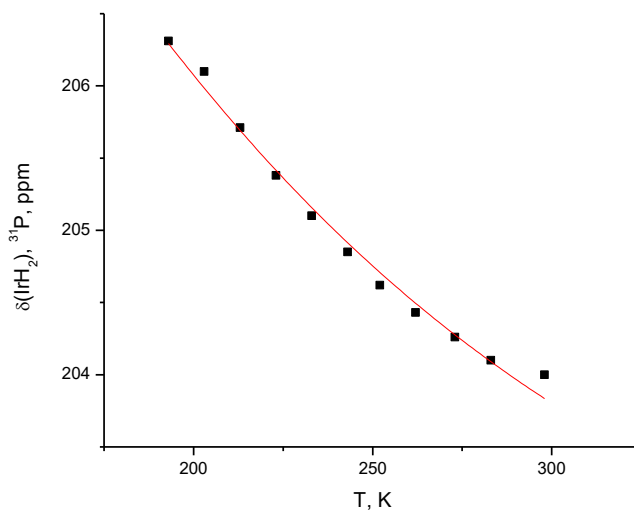

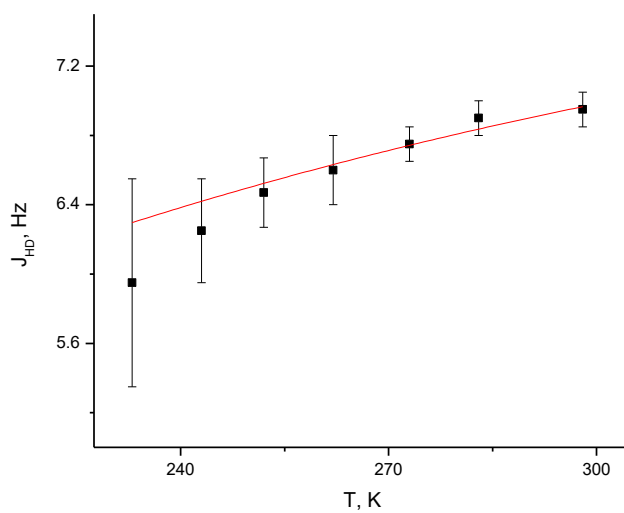

**Figure S8.** A two-component model (S and NS) fit of variable temperature NMR spectra of (*p*-H-POCOP)IrH<sub>2</sub> toluene-*d*<sub>8</sub>. <sup>1</sup>H and <sup>31</sup>P chemical shifts, as well as  $J_{HD}$  are fitted.

### 3.9 Complex (*p*-MeO-POCOP)IrH<sub>2</sub> in toluene-*d*<sub>8</sub>:

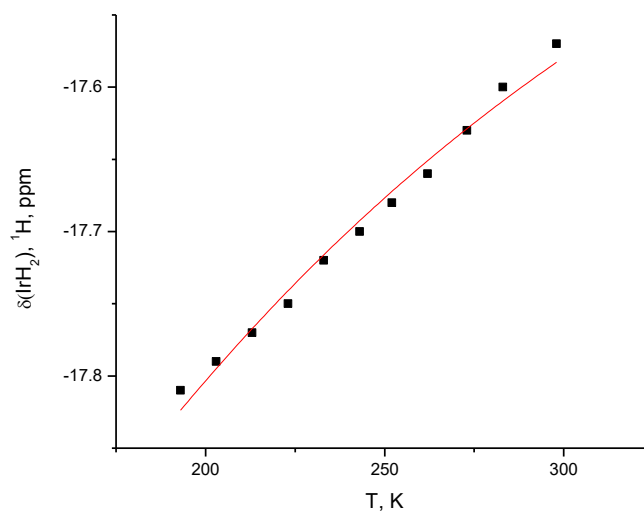

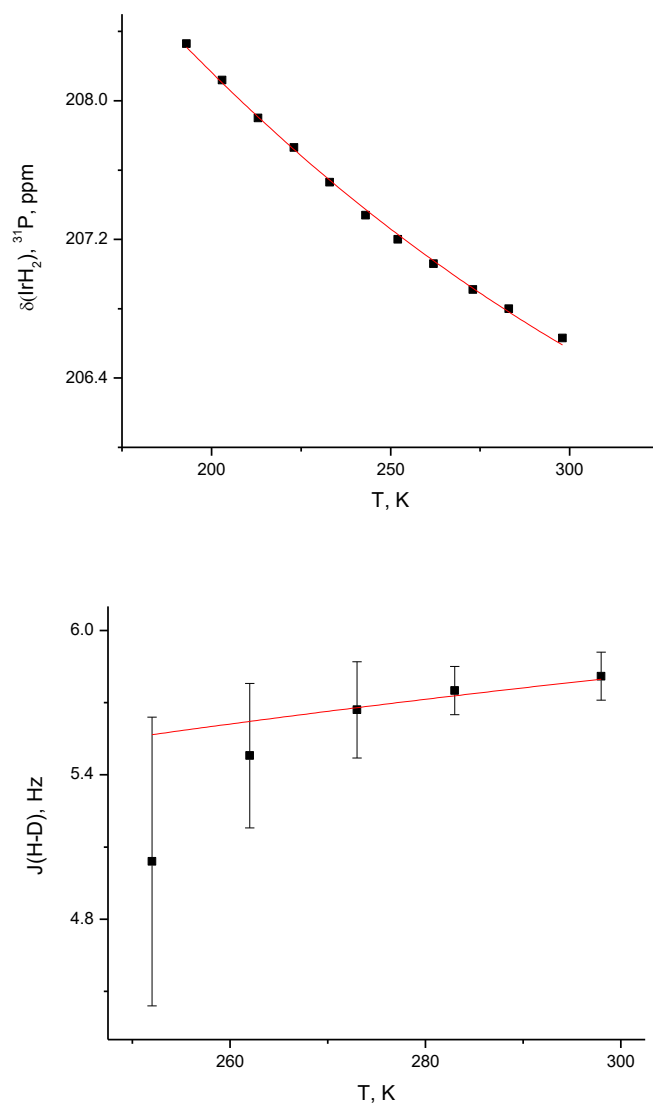

**Figure S9.** A two-component model (**S** and **NS**) fit of variable temperature NMR spectra of (*p*-MeO-POCOP)IrH<sub>2</sub> toluene-*d*<sub>8</sub>. <sup>1</sup>H and <sup>31</sup>P chemical shifts, as well as  $J_{\text{HD}}$  are fitted.



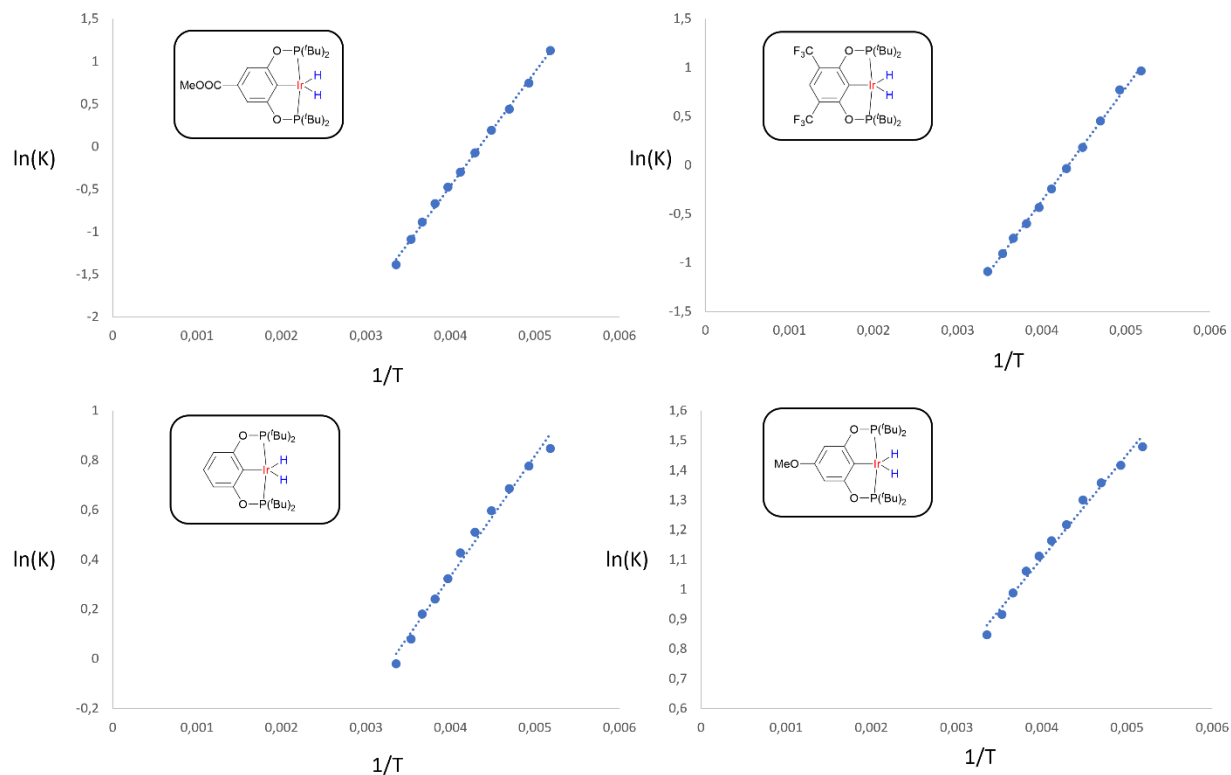

**Figure S10.** Van't Hoff plots for S-NS equilibria in (X-POCOP)IrH<sub>2</sub> over -80...+25 °C.

**Table S6.** A summary of two-component (S and NS) model fit of NMR spectra of (X-POCOP)IrH<sub>2</sub> in toluene-*d*<sub>8</sub>.

| $\delta S, ^1H, \text{ppm}$                                        | -16.1 | -16.0 | -15.1±0.6  | -15.6±0.4  |
|--------------------------------------------------------------------|-------|-------|------------|------------|
| $\delta S, ^{31}P, \text{ppm}$                                     | 196   | 198   | 203.3±0.3  | 212.7±0.3  |
| $J_{HD} S, \text{Hz}$                                              | ~9-11 | ~9-11 | 9.2±1.3    | 9.6±1.1    |
| $^2J_{PH} S, \text{Hz}$                                            | -     | -     | -          | 7.6±0.4    |
| $\delta NS, ^1H, \text{ppm}$                                       | -18.2 | -18.0 | -18.6±1.3  | -19.3±0.7  |
| $\delta NS, ^{31}P, \text{ppm}^*$                                  | 211   | 210   | 205.1±0.7  | 215.2±0.5  |
| $J_{HD} NS, \text{Hz}$                                             | ~3-5  | ~3-5  | 2.2±2.9    | 0.1±2.0    |
| $^2J_{PH} NS, \text{Hz}$                                           | -     | -     | -          | 11.4±0.7   |
| $\Delta H, \text{kcal/mol}$                                        | -0.7  | -1.0  | -1.9±1.1   | -2.0±0.6   |
| $\Delta S, \text{cal} \times \text{mol}^{-1} \times \text{K}^{-1}$ | -0.7  | -3.2  | -8.1±3.8** | -8.6±2.3** |

\*Note that <sup>31</sup>P chemical shifts are well-known to be temperature dependent, and may also change because of the reasons that are not connected with S/NS equilibrium. \*\* The entropy values may indicate participation of toluene in stabilization of NS.

**Table S7.** Experimental and calculated distances and energies relevant to **S** and **NS** structures in (X-POCOP)IrH<sub>2</sub> complexes in toluene.

|                                               |                                         | 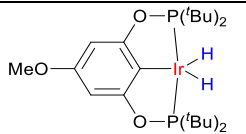 |  |  |  |
|-----------------------------------------------|-----------------------------------------|-----------------------------------------------------------------------------------|-----------------------------------------------------------------------------------|------------------------------------------------------------------------------------|-------------------------------------------------------------------------------------|
| $r(\text{H-H})$<br>in <b>S</b> ,<br>exp., Å   | Neutron<br>diff.                        | -                                                                                 | 1.43                                                                              | -                                                                                  | -                                                                                   |
|                                               | $J_{\text{HD-fitted}}$                  | ~1.4                                                                              | ~1.4                                                                              | 1.42                                                                               | 1.40                                                                                |
|                                               | $T_1(\text{min})$                       | <1.57                                                                             | <1.54                                                                             | <1.70                                                                              | <1.70                                                                               |
| $r(\text{H-H})$<br>in <b>S</b> ,<br>calc., Å  | D3BJ-<br>revPBE                         | 1.64                                                                              | 1.60                                                                              | 1.57                                                                               | 1.57                                                                                |
|                                               | D3BJ-<br>revPBE //<br>DLPNO-<br>CCSD(T) | 1.57±0.05                                                                         | 1.62±0.05                                                                         | -                                                                                  | -                                                                                   |
| $r(\text{H-H})$<br>in <b>NS</b> ,<br>exp., Å  | $J_{\text{HD-fitted}}$                  | ~1.7                                                                              | ~1.7                                                                              | ~2                                                                                 | ~2                                                                                  |
| $r(\text{H-H})$<br>in <b>NS</b> ,<br>calc., Å | D3BJ-<br>revPBE                         | 1.64                                                                              | 1.63                                                                              | 2.07                                                                               | 1.99                                                                                |
|                                               | D3BJ-<br>revPBE //<br>DLPNO-<br>CCSD(T) | 2.14±0.05                                                                         | 2.08±0.05                                                                         | -                                                                                  | -                                                                                   |
| $\Delta\text{H-exp.}$                         | fitted                                  | Ca. -0.7                                                                          | Ca. -1.0                                                                          | -1.9±1.1                                                                           | -2.0±0.6                                                                            |
| $\Delta\text{S-exp.}$                         | fitted                                  | Ca. -0.7                                                                          | Ca. -3.2                                                                          | -8.1±3.8                                                                           | -8.6±2.3                                                                            |
| $\Delta\text{H-calc}$                         | D3BJ-<br>revPBE                         | +1.15                                                                             | -0.06                                                                             | -0.69                                                                              | -0.45                                                                               |
|                                               | revPBE//<br>DLPNO-<br>CCSD(T)           | +1.21                                                                             | -0.27                                                                             | -1.88                                                                              | -1.04                                                                               |
| $\Delta\text{S-calc}$                         | D3BJ-<br>revPBE                         | -0.52                                                                             | -0.46                                                                             | -1.78                                                                              | -3.62                                                                               |

#### 4. Evaluating isotope effects in (X-POCOP)IrH<sub>2</sub>

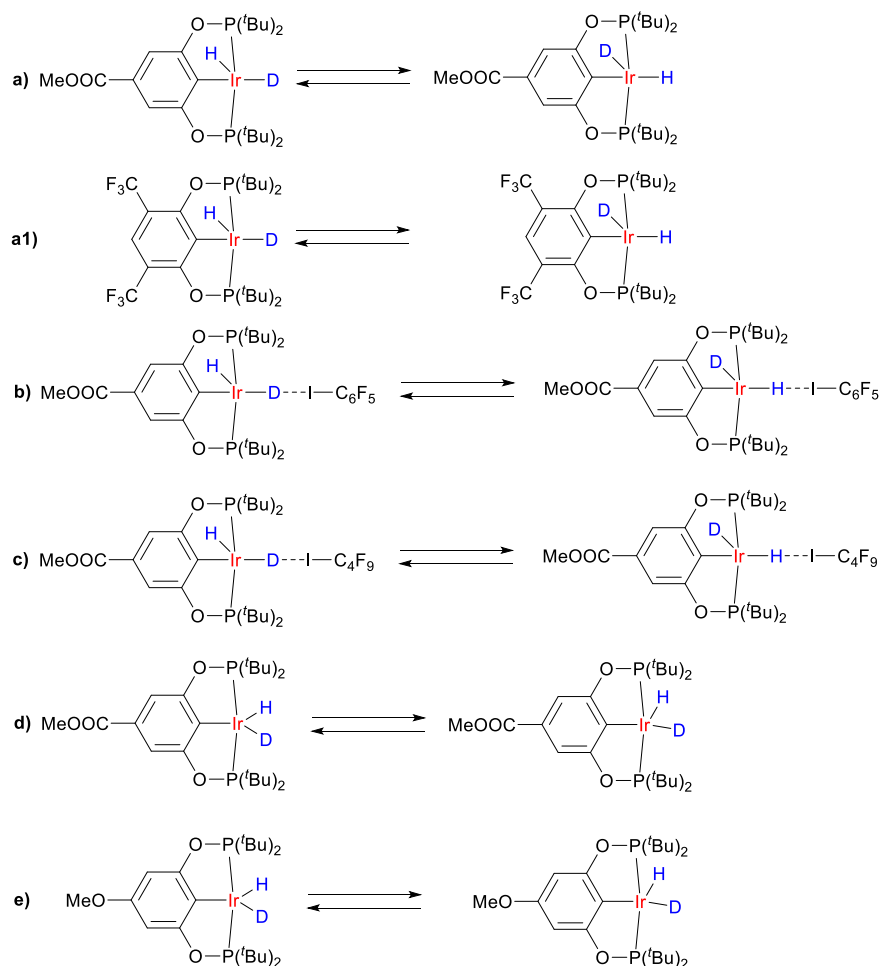

**Figure S11.** Equilibria relevant to isotope effect measurements in (X-POCOP)IrH<sub>2</sub>.

A reliable, although not very precise, estimate of thermodynamics of substitution with deuterium is only available for the adduct of (*p*-MeOOC-POCOP)IrH<sub>2</sub>---IC<sub>4</sub>F<sub>9</sub> (Figure S11, (c)). This compound is static at low temperatures, that allowed to measure the affinity of deuterium for the apical position (Figure S12).

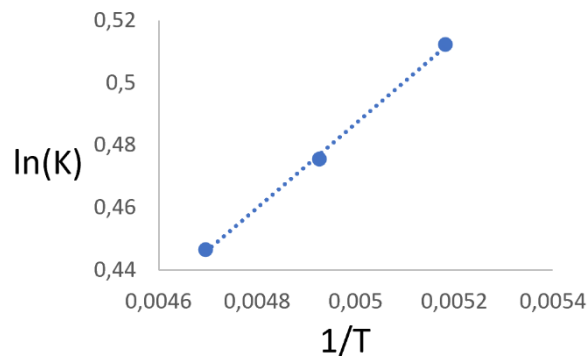

**Figure S12.** A van't Hoff plot for  $(p\text{-MeOOC-POCOP})\text{IrH}_{\text{apical}}\text{D}_{\text{equatorial}}\text{-IC}_4\text{F}_9 \leftrightarrow (p\text{-MeOOC-POCOP})\text{IrH}_{\text{equatorial}}\text{D}_{\text{apical}}\text{-IC}_4\text{F}_9$  for at -60, -70 and -80 °C.  $\Delta H = -0.27 \pm 0.01$  kcal/mol and  $\Delta S = -0.37 \pm 0.06$  cal $\times$ mol $^{-1}\times$ K $^{-1}$ .

The following equation was used to calculate K using experimental  $\Delta\delta$ , that can be readily derived from the definition of K:

$$\Delta\delta = \delta_{\text{HD}} - \delta_{\text{HH}} = \frac{(\delta_{\text{A}} - \delta_{\text{B}})(1 - K)}{2(K + 1)}$$

Where K is the equilibrium constant and  $\delta_{\text{A}}$  and  $\delta_{\text{B}}$  are the following chemical shifts:

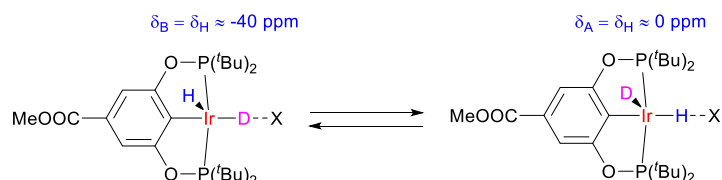

Experimental data on  $\delta_{\text{A}}$  and  $\delta_{\text{B}}$  are not available, but based on the NMR calculations we estimate  $\delta_{\text{B}}$  as  $-40 \pm 2$  ppm (which can be compared to experimental value for iso-structural  $(p\text{-MeOOC-POCOP})\text{IrHCl}$   $\delta_{\text{H}} = -40.12$  ppm) and  $\delta_{\text{A}}$  as  $0 \pm 5$  ppm (which does not have a close analogue to compare, for somewhat related  $(p\text{-H-POCOP})\text{IrH}(\text{H}_2)^+$  with dihydrogen ligand *trans* to aryl,  $\delta_{\text{H}} = 0.3$  ppm). Hence, we take  $\delta_{\text{A}} - \delta_{\text{B}} \approx 40$  ppm.

For other complexes, some assumptions are to be made. Thus, we suppose  $\delta_{\text{A}} - \delta_{\text{B}} \approx 40$  ppm stays for  $(p\text{-MeOOC-POCOP})\text{IrH}_2\text{-IC}_6\text{F}_5$  adduct as well. Simplistically assuming that only **S** and **NS-bound** are present in the model, and  $\delta(\text{S-IrH}_2) \approx \delta(\text{S-IrHD})$ , a fit gives a linear van't Hoff plot with  $\Delta H = -0.34 \pm 0.01$  kcal/mol and  $\Delta S = -0.92 \pm 0.05$  cal $\times$ mol $^{-1}\times$ K $^{-1}$  (Figure S13), that are already fairly close to the previous estimate for related  $\text{C}_4\text{F}_9\text{I}$  (Figure S12). A more sophisticated **S/NS/NS-bound** model provides  $\Delta H = -0.20 \pm 0.01$  kcal/mol and  $\Delta S = -0.03 \pm 0.05$  cal $\times$ mol $^{-1}\times$ K $^{-1}$ , that are in a better agreement with the DFT calculated values ( $\Delta H = -0.23$  kcal/mol and  $\Delta S = +0.00061$  cal $\times$ mol $^{-1}\times$ K $^{-1}$ )

For  $(p\text{-MeOOC-POCOP})\text{IrH}_2$  and  $(m\text{-bis-CF}_3\text{-POCOP})\text{IrH}_2$  in toluene- $d_8$ , in order to obtain a good fit of  $\Delta\delta$  one needs either to adjust  $\delta(\text{S})$  and, optionally,  $\delta(\text{NS})$ , or to assign comparatively high “intrinsic” isotope chemical shifts to **S** and, optionally, **NS**. Thus, leaving  $\delta(\text{S})$  intact requires

ascribing an “intrinsic”, temperature-independent  $\Delta\delta$  of -0.4 and -0.3 ppm to the above-mentioned complexes, respectively. This is larger than the common range of “intrinsic”  $\Delta\delta$  -s for transition metal hydrides ( $\pm 0.02$ -0.1 ppm, more rarely up to  $\pm 0.2$  ppm<sup>15,16</sup>), but still reasonable, especially in view of theories that deuterium can induce de-symmetrization in certain molecules,<sup>17</sup> that in the case of **S** should have a dramatic effect. Besides, it would seem that  $\delta(\text{IrH}_2)$  and  $\delta(\text{IrHD})$  are asymptotically approaching a comparable  $\Delta\delta$  at high-temperature limit. It is also possible that one needs to adjust both  $\delta(\text{S})$  and  $\Delta\delta$  in balanced manner. Note also that for a wide temperature range van't Hoff plots for isotope effects may not necessarily be linear.<sup>18</sup>

Taking the  $\delta_A - \delta_B$  as ca. 30 ppm based on the fitted  $J_{\text{HD}}$ 's and calculated  $\delta$ - $r(\text{H-H})$  dependence, and using the above-made assumptions as well as taking **S** to **NS** ratio from  $\delta(\text{IrH}_2)$ , a fit of  $\delta(\text{IrHD})$  would produce  $\Delta H = -0.061 \pm 0.002$  kcal/mol and  $\Delta S = 0.142 \pm 0.007$  cal $\times$ mol<sup>-1</sup> $\times$ K<sup>-1</sup> for deuterium positioning at apical vs. equatorial sites. These values are close to the calculated ones (Table S8) and argue for consistency of the model, but they are dependent on the assumptions made.

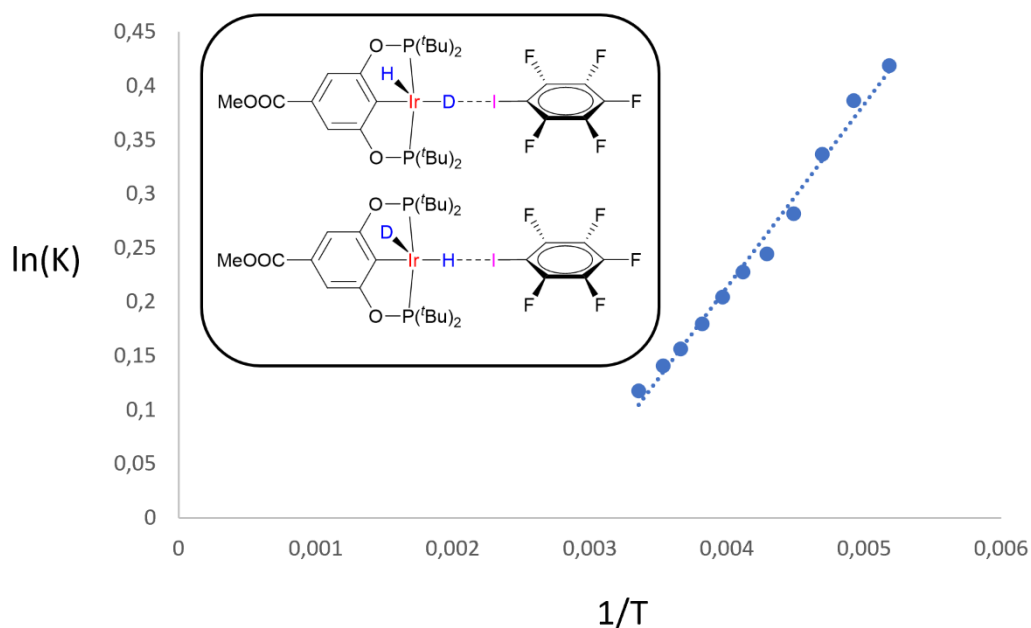

**Figure 13.** A van't Hoff plot for  $(p\text{-MeOOC-POCOP})\text{IrH}_{\text{apical}}\text{D}_{\text{equatorial}}\text{---IC}_6\text{F}_5 \leftrightarrow (p\text{-MeOOC-POCOP})\text{IrH}_{\text{equatorial}}\text{D}_{\text{apical}}\text{---IC}_6\text{F}_5$  over +25...-80 °C using **S/NS-bound** model.

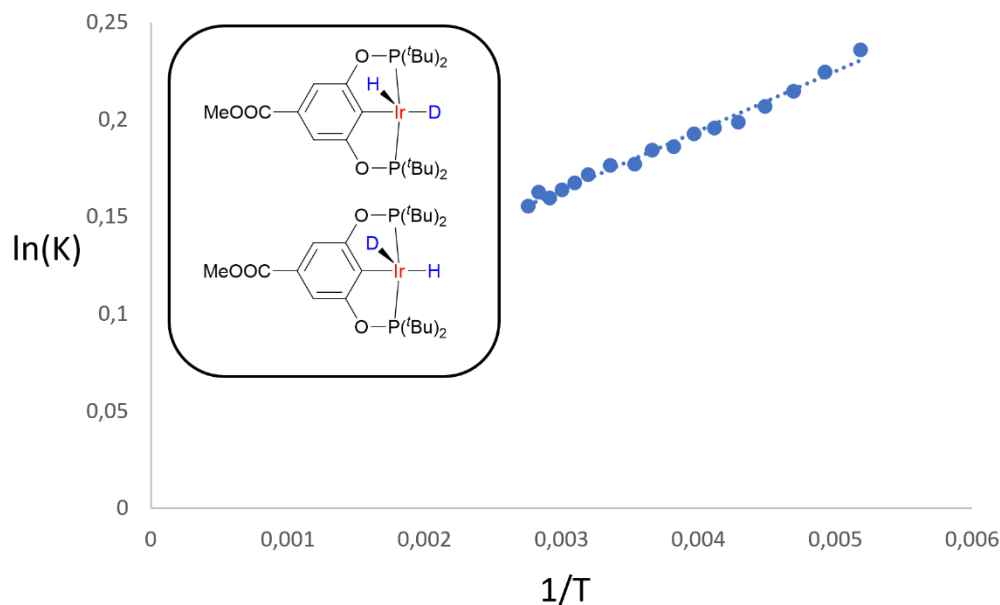

**Figure S14.** A van't Hoff plot for  $(p\text{-MeOOC-POCOP})\text{IrH}_{\text{apical}}\text{D}_{\text{equatorial}} \leftrightarrow (p\text{-MeOOC-POCOP})\text{IrH}_{\text{equatorial}}\text{D}_{\text{apical}}$  in toluene- $d_8$  over  $+100 \dots -80$  °C using S/NS model..

For  $(p\text{-MeO-POCOP})\text{IrH}_2$  at low temperatures  $\delta(\text{IrHD})$  is observed ca. 0.15 ppm to high-field from  $\delta(\text{IrH}_2)$  (Table S4). This is a “normal” direction<sup>19</sup> (and magnitude) of  $\Delta\delta$  and this probably reflects the “intrinsic”  $\Delta\delta$  in **S**- $(p\text{-MeO-POCOP})\text{IrH}_2$ . In complex  $(\text{PCP})\text{IrH}_2$ , where **NS** presumably is not populated,  $\Delta\delta$  is also high-field from  $\delta(\text{IrH}_2)$ . Hence, for  $(p\text{-MeO-POCOP})\text{IrH}_2$  the small temperature dependence of  $\Delta\delta$  can be explained by: (a) a minor population of **NS** at elevated temperatures, if **S** is lower in energy than **NS**; (b) a temperature dependent “intrinsic”  $\Delta\delta$ ; and (c) *intermolecular* isotope perturbation of equilibria, or the higher affinity of deuterium for **NS** structure, if **NS** is lower in energy than **S**. If model (c) is chosen, then, assuming there is a temperature independent intrinsic isotope effect of 0.15 ppm, a van't Hoff plot for  $\delta(\text{IrHD})$  using chemical shifts from  $\delta(\text{IrH}_2)$  gives  $\Delta H = -1.1$  kcal/mol and  $\Delta S = -2.5$  cal $\times$ mol<sup>-1</sup> $\times$ K<sup>-1</sup>, and after subtraction of values for  $\delta(\text{IrH}_2)$  fit, isotope effect is obtained as  $\Delta H = -0.4$  kcal/mol and  $\Delta S = -1.8$  cal $\times$ mol<sup>-1</sup> $\times$ K<sup>-1</sup>.

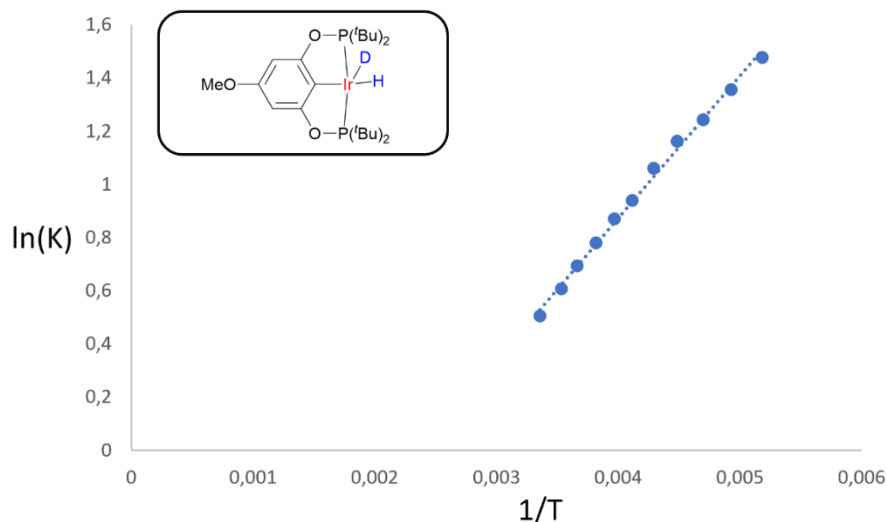

**Figure S15.** A van't Hoff plot for (*p*-MeO-POCOP)IrHD using a two-component model with chemical shifts taken from (*p*-MeO-POCOP)IrH<sub>2</sub> (see above) and using intrinsic isotope effect correction of 0.15 ppm for both **S** and **NS** structures. Temperatures range +25...-80 °C.

**Table S8.** Experimental and calculated isotope effects on chemicals shifts in (X-POCOP)IrH<sub>2</sub>. For experimental values, mathematical standard errors are provided, that are likely smaller than the real errors in the case of the complex system studied.

| Reaction | $\Delta H$ -exp, kcal/mol                         | $\Delta S$ -exp, cal $\times$ mol <sup>-1</sup> $\times$ K <sup>-1</sup> | $\Delta H$ -calc, kcal/mol                                          | $\Delta S$ -calc, cal $\times$ mol <sup>-1</sup> $\times$ K <sup>-1</sup> |
|----------|---------------------------------------------------|--------------------------------------------------------------------------|---------------------------------------------------------------------|---------------------------------------------------------------------------|
| a)       | -0.061 $\pm$ 0.002                                | +0.142 $\pm$ 0.007                                                       | -0.13                                                               | +0.11                                                                     |
| a1)      | -0.10 $\pm$ 0.003                                 | -0.04 $\pm$ 0.01                                                         | -                                                                   | -                                                                         |
| b)       | -0.20 $\pm$ 0.01                                  | -0.03 $\pm$ 0.05                                                         | -0.23                                                               | +0.00061                                                                  |
| c)       | -0.27 $\pm$ 0.01                                  | -0.37 $\pm$ 0.06                                                         | -0.23                                                               | +0.022                                                                    |
| d)       | -                                                 | -                                                                        | (IrH <sub>2</sub> : -0.69)<br>(IrHD: -0.68)<br>(for H-apic)<br>0.01 | (IrH <sub>2</sub> : -3.62)<br>(IrHD: -3.62)<br>(for H-apic)<br>0          |
| e)       | (IrH <sub>2</sub> : -0.7)<br>(IrHD: -1.1)<br>-0.4 | (IrH <sub>2</sub> : -0.7)<br>(IrHD: -2.5)<br>-1.8                        | (IrH <sub>2</sub> : 1.15)<br>(IrHD: 1.04)<br>-0.11                  | (IrH <sub>2</sub> : -0.52)<br>(IrHD: -0.39)<br>+0.13                      |

## 5. IR spectroscopy of (X-POCOP)IrH<sub>2</sub>

**Table S9. Experimental and calculated IR spectra of (X-POCOP)IrH<sub>2</sub>**

| X =                                                               | <i>p</i> -MeO-                              | <i>p</i> -H-                              | <i>p</i> -MeOOC-               |
|-------------------------------------------------------------------|---------------------------------------------|-------------------------------------------|--------------------------------|
| Hexane                                                            | 2084 (br m),<br>2103 (w)                    | 1890 (w br)?<br>~2090 (br m),<br>2110 (w) | 1908 (br, w)?<br>2118 (m)      |
| CH <sub>2</sub> Cl <sub>2</sub>                                   | 2086 (br),<br>1990 (br)?,<br>1933 (br, vs)? | ~1898 (br s)<br>~2100 (br m),             | 1899 (vbr, s)?<br>2121 (m)     |
| hexane+C <sub>6</sub> F <sub>5</sub> I                            | n/d                                         | n/d                                       | ~1860<br>(br, vs)<br>2119 (m), |
| Calc.- <b>S</b>                                                   | 2124 (s),<br>2136 (w)                       | 2133 (s),<br>2146 (w)                     | 2135 (s),<br>2153 (w)          |
| Calc.- <b>NS</b>                                                  | 2093 (s)<br>2172 (w)                        | 2058 (s),<br>2225 (w)                     | 1891 (s)<br>2419 (w)           |
| Calc.- <b>NS-bound</b><br>(with C <sub>6</sub> F <sub>5</sub> I)  | 1903 (vs),<br>2318 (vw)                     | 1858 (vs),<br>2405 (vw)                   | 1865 (vs),<br>2422 (vw)        |
| Calc.- <b>NS-bound</b><br>(with CH <sub>2</sub> Cl <sub>2</sub> ) | n/d                                         | 2019 (vs)<br>2310 (vw)                    | 1944 (vs)<br>2408 (vw)         |

Abbreviations: br – broad, vbr – very broad, vs – very strong, s -strong, m – medium, w -weak, vw -very weak. (?) refers to ambiguous assignment.

In the IR spectra of (*p*-MeO-POCOP)IrH<sub>2</sub> and (*p*-H-POCOP)IrH<sub>2</sub> in hexane, two main bands are observed: one sharp (at 2103 and 2110 cm<sup>-1</sup>, respectively), and one broad and more intense (at ca. 2084 and ca. 2090 cm<sup>-1</sup>, respectively). Although a few other bands could be occasionally noted, they are all seemingly assigned to traces of the respective IrH<sub>4</sub> complexes and decomposition products. Complex (*p*-MeOOC-POCOP)IrH<sub>2</sub> revealed only a sharp band at 2119 cm<sup>-1</sup>, also, a weak broad band at 1908 cm<sup>-1</sup> was observed. The latter is in the region that overlaps with IR signals of the respective IrH<sub>4</sub> complex, and therefore the assignment to IrH<sub>2</sub> is ambiguous.

Computationally, within **S** structure, Ir-H stretchings are coupled and form two bands separated by 10-15 cm<sup>-1</sup>, one intense for near-symmetrical vibration and one weak for non-symmetrical vibration. In **NS** structures the coupling is gradually broken upon increasing de-symmetrization, and ultimately two separated Ir-H stretches corresponding to apical (very weak) and equatorial (very strong) hydrogens appear; those could differ by more than 400 cm<sup>-1</sup>.

Our interpretation is that sharp bands in hexane solution of (*p*-MeO-POCOP)IrH<sub>2</sub> and (*p*-H-POCOP)IrH<sub>2</sub> correspond to symmetric vibration in **S**, while broad bands are attributed to symmetric vibration in **NS**. For (*p*-MeOOC-POCOP)IrH<sub>2</sub> **S** band is at 2118 cm<sup>-1</sup>, while **NS** band



corresponding to equatorial Ir-H stretch is possibly at  $1908\text{ cm}^{-1}$ . Moving from hexane to  $\text{CH}_2\text{Cl}_2$  leaves the **S** band almost unchanged, while a new strong and broad adsorption rises at ca  $1900\text{ cm}^{-1}$  for  $(p\text{-H-POCOP})\text{IrH}_2$  and  $(p\text{-MeOOC-POCOP})\text{IrH}_2$ . That is attributed to equatorial Ir-H stretch in **NS-bound** form of these compounds. Addition of  $\text{C}_6\text{F}_5\text{I}$  to hexane solution of  $(p\text{-MeOOC-POCOP})\text{IrH}_2$  resulted in appearance of a new broad band at ca.  $1860\text{ cm}^{-1}$ , that matches the solid-state absorption in  $(p\text{-MeOOC-POCOP})\text{IrH}_2\text{---IC}_6\text{F}_5$  at  $1870\text{ cm}^{-1}$ , and is close to computational prediction for that compound.

## 6. Halogen bond strength estimation

### 6.1 General notes.

Quantitative measurement of halogen bond strength is complicated by the complexity of the system. All halogen bond formation reactions with C<sub>4</sub>F<sub>9</sub>I strongly interfere with formation of IrH(C<sub>4</sub>F<sub>9</sub>I)H (see Figure 7 in the manuscript for an example) and therefore are not suitable for fitting. (PCP)IrH<sub>2</sub> reacts rapidly with C<sub>6</sub>F<sub>5</sub>I at near ambient temperatures and undergoes considerable (PCP)IrH(C<sub>4</sub>F<sub>9</sub>I)H formation at low temperatures, and data for that complex is not suitable for fitting as well.

Therefore only (X-POCOP)IrH<sub>2</sub>/C<sub>6</sub>F<sub>5</sub>I system is left, where we suppose estimates, but not precise measurements, of binding energies could be obtained. Some of the possible error sources are:

- competing coordination of C<sub>6</sub>F<sub>5</sub>I to Ir with formation of IrH(C<sub>6</sub>F<sub>5</sub>I)H
- different **S-NS** equilibria in toluene-*d*<sub>8</sub> compared to equilibria the presence of C<sub>6</sub>F<sub>5</sub>I co-solvent
- reaction of hydrides with C<sub>6</sub>F<sub>5</sub>I with formation of corresponding iodides
- possible involvement of other coordination modes (for example as depicted on Figure 8) at certain conditions

Those factors were addressed as following:

- Based on the low-temperature measurements of separated signals (where observed), extrapolation suggests that at most of the temperatures  $K_{(\text{IrH}_2 \cdots \text{C}_6\text{F}_5\text{I})} / K_{(\text{IrH}[\text{C}_6\text{F}_5\text{I}]\text{H})} \geq 50\text{-}100$  and thus (a) shall introduce comparatively small error.
- It was accounted for numerically, through adjusting concentrations.
- We believe b) is not significant for X = *p*-MeO- and *p*-H-, but for *p*-MeOOC and *m*-bis-CF<sub>3</sub> it may introduce errors and perhaps is responsible for deviations of experimental titration curves from theoretical ones.

### 6.2 Fitting of $\delta(\text{IrH}_2)$ -*T* dependence

To extract binding parameters of C<sub>6</sub>F<sub>5</sub>I to (X-POCOP)IrH<sub>2</sub>, we have attempted fitting of  $\delta(\text{IrH}_2)$ -*T* dependence in the presence of constant amount of C<sub>6</sub>F<sub>5</sub>I. We tried **S/NS-bound** and **S/NS/NS-bound** models, both were found to reproduce the experimental curves. The latter is believed to be more relevant, and therefore all results are given according to **S/NS/NS-bound** model. We have used **S** and **NS** chemical shifts obtained from fit in toluene. **NS-bound** chemical shifts give a “soft” convergence to span of ca. -21.7...-23 ppm, of which all values acceptably reproduce the experimental curves (see Figure S16 for the curves and the respective van't Hoff plots). Residual errors slightly favored -22.0 ppm X = *p*-MeOOC- and -22.5 ppm for X = *p*-MeO-, *p*-H- and *m*-bis-CF<sub>3</sub>. In an attempt to minimize the influence of competing dynamic processes, we then used these chemical shifts to re-fit the four lowest-temperature data points where formation of **NS-bound** is expected to be dominating. The resulting  $\Delta H$  and  $\Delta S$  values are given in Table 2 in the manuscript. The only directly observed chemical shift of completely frozen, static halogen bond adduct of the type **NS-bound**, observed for (*p*-MeOOC-POCOP)IrH<sub>2</sub>---C<sub>4</sub>F<sub>9</sub>I (-22.06 ppm), is in good agreement with the fitted data (-22.0 ppm for X = *p*-MeOOC-).

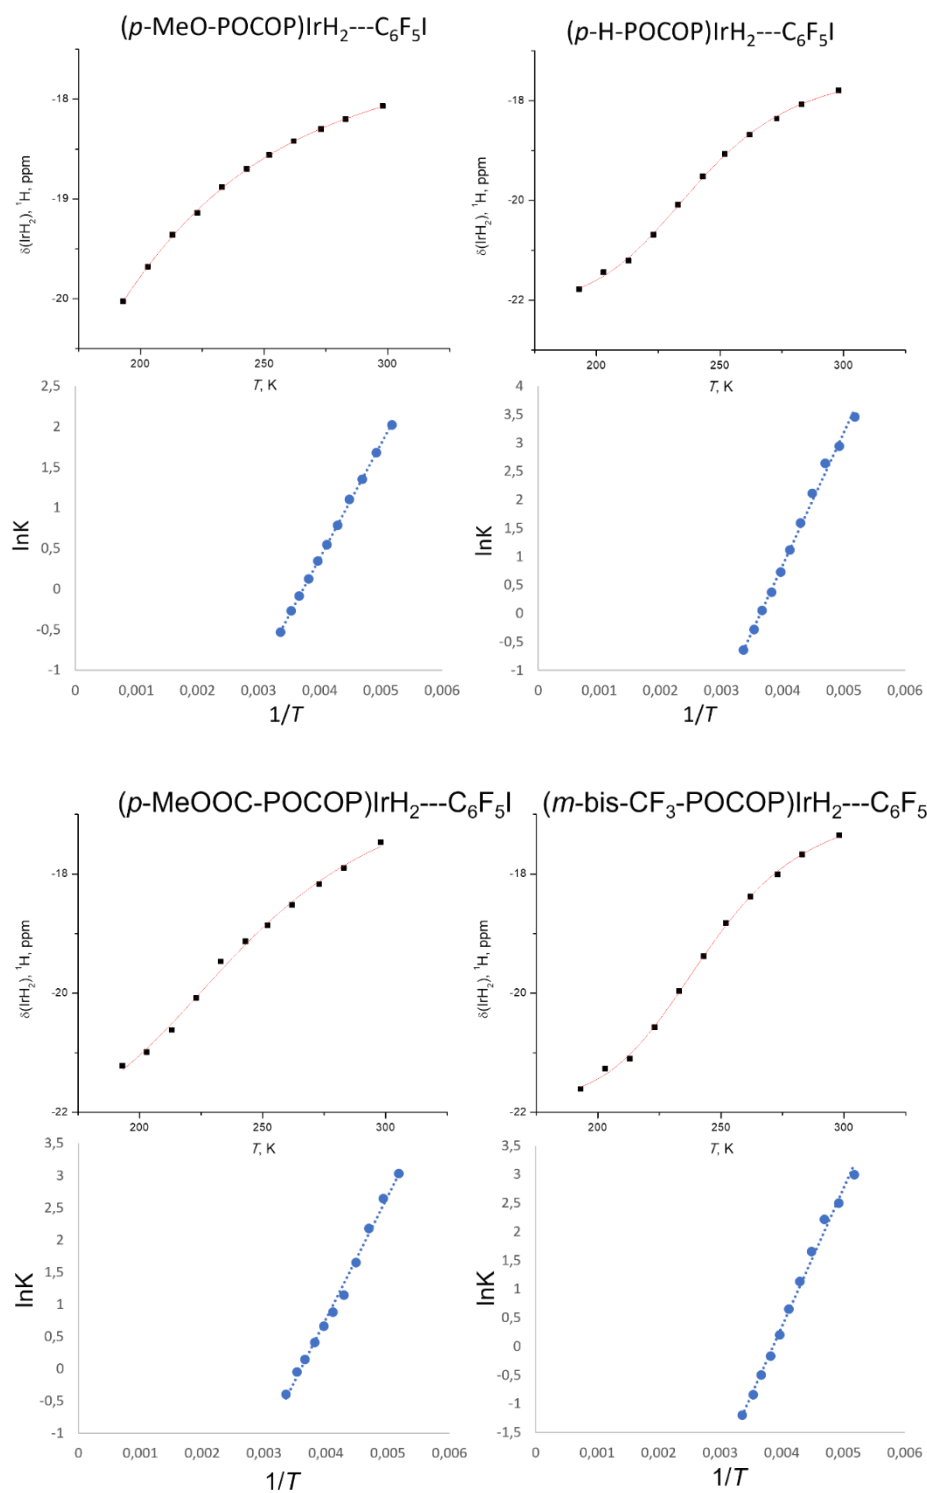

**Figure S16.** Fit of <sup>1</sup>H NMR chemical shifts for (X-POCOP)IrH<sub>2</sub>/C<sub>6</sub>F<sub>5</sub>I/toluene-*d*<sub>8</sub> system using S/NS/NS-bound model and the respective van't Hoff plots.

### 6.3 Fitting to 1:1 binding isotherm

Also, titration of (X-POCOP)IrH<sub>2</sub> with C<sub>6</sub>F<sub>5</sub>I and subsequent fitting to 1:1 binding isotherm was attempted. For X = *p*-H- such titration was performed at three different temperatures, such as  $\Delta H$  and  $\Delta S$  can be extracted. Example curves for X = *p*-MeO- and van't Hoff plot for X = *p*-H- are given on Figures S17 and Figure S18, respectively. We noted some deviations from theoretically calculated curves that are small for X = *p*-MeO- but more significant for electron-withdrawing groups. We attribute it to **S-NS** equilibria change upon mixing of toluene with C<sub>6</sub>F<sub>5</sub>I, although the involvement of competing coordination modes of C<sub>6</sub>F<sub>5</sub>I cannot be excluded. The “mathematical” errors of  $\Delta H$  are within 0.1-0.3 kcal/mol, however we suppose in the light of above-mentioned problems, the real errors could reach  $\pm 1$  kcal/mol for  $\Delta H$  and  $\pm 5$  cal $\times$ mol<sup>-1</sup> $\times$ K<sup>-1</sup> for  $\Delta S$ .

Note that  $^2J_{PH}$  and  $J_{HD}$  can also be used for fitting to 1:1 isotherm. Since the coupling constants are measured with less accuracy compared to chemical shifts and often are not resolved, we used  $\Delta H$  and  $\Delta S$  from  $\delta(\text{IrH}_2)$  to obtain values for **NS-bound**. Thus,  $^2J_{PH}$  and  $J_{HD}$  of ca. 13 Hz and ca. -3 Hz, respectively, were obtained, indicating SP geometry of **NS-bound**. Since  $J_{HD}$ -s are smaller and more sensitive to linewidth, we suppose the associated decay may not be fully filtered out, and thus **NS-bound- $J_{HD}$**  may be slightly overestimated.

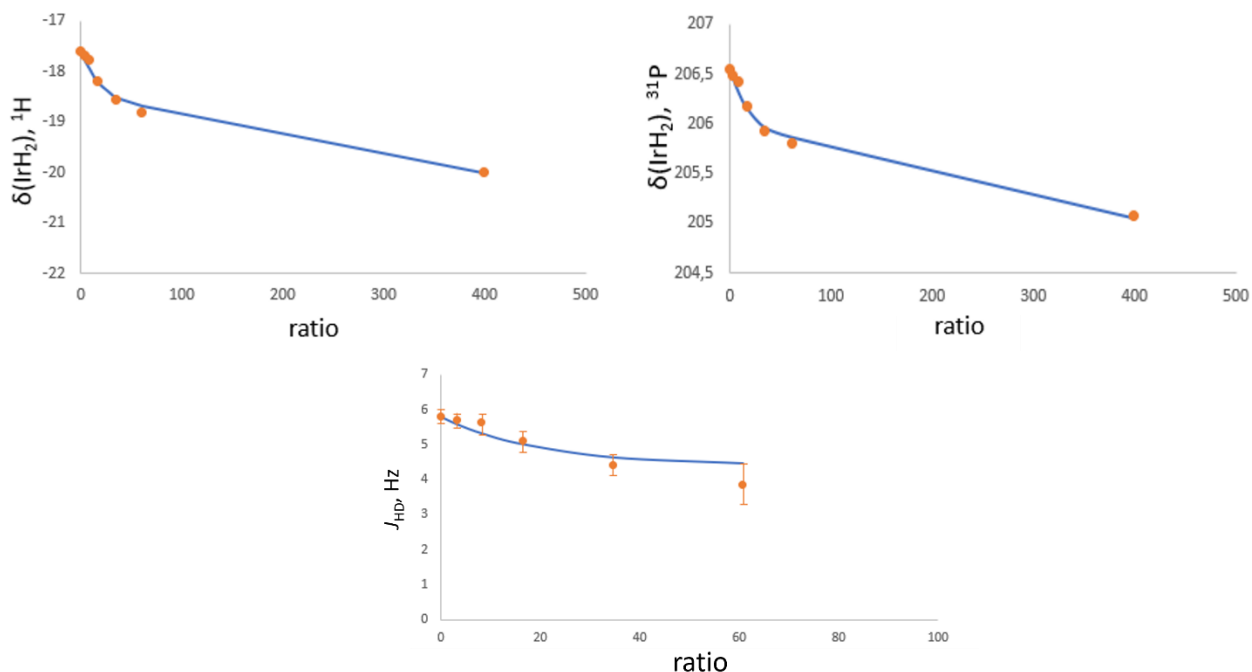

**Figure S17.** Titration of (*p*-MeO-POCOP)IrH<sub>2</sub> with C<sub>6</sub>F<sub>5</sub>I in toluene-*d*<sub>8</sub> followed with NMR. Orange - experimental values, blue – calculated curves.

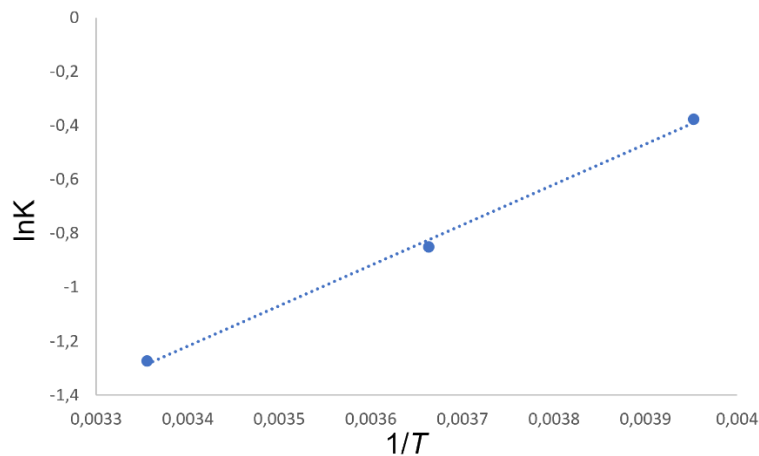

**Figure S18.** A van't Hoff plot for titration of (*p*-H-POCOP)IrH<sub>2</sub> with C<sub>6</sub>F<sub>5</sub>I in toluene-*d*<sub>8</sub> at +25 °C, 0 °C and -20 °C.

#### 6.4 Analysis of (*p*-MeOOC-POCOP)IrH<sub>2</sub>---C<sub>4</sub>F<sub>9</sub>I ↔ (*p*-MeOOC-POCOP)IrH(C<sub>4</sub>F<sub>9</sub>)H equilibrium

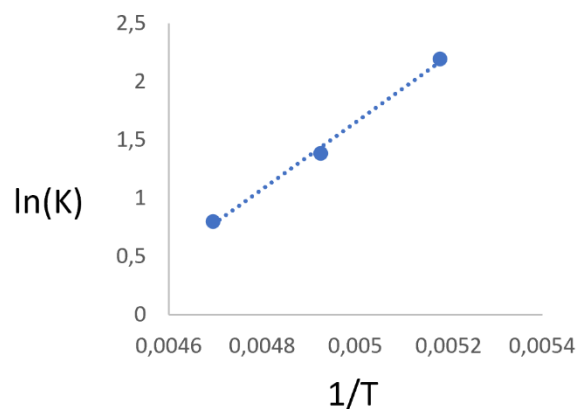

**Figure S19.** A van't Hoff plot for (*p*-MeOOC-POCOP)IrH<sub>2</sub>---C<sub>4</sub>F<sub>9</sub>I ↔ (*p*-MeOOC-POCOP)IrH(C<sub>4</sub>F<sub>9</sub>)H equilibrium at -60, -70 and -80 °C.  $\Delta H = -5.7 \pm 0.4$  kcal/mol and  $\Delta S = -25 \pm 2$  cal $\times$ mol<sup>-1</sup> $\times$ K<sup>-1</sup>.

## 7. Dihydrogen bonding with CH<sub>2</sub>Cl<sub>2</sub>

**S/NS-bound** model was used. The NMR datasets were found to be difficult to converge to unambiguous solutions. Therefore, we used the limiting chemical shifts obtained for **S** structures in toluene-*d*<sub>8</sub> as constrains, other paraments were fitted freely. Based on computational results, we suppose that the geometry of **S** structures are little dependent on medium and such restriction is justified. Thus, for **S**-(*p*-H-POCOP)IrH<sub>2</sub>  $r(\text{H-H})$  calculated for in toluene is 1.60 Å, while in CH<sub>2</sub>Cl<sub>2</sub> 1.62 Å. Completely relaxed fits for X = *p*-MeOOC and *m*-bis-CF<sub>3</sub> converge not too far from Table S10 data.

### Complex (*m*-bis-CF<sub>3</sub>-POCOP)IrH<sub>2</sub> in CD<sub>2</sub>Cl<sub>2</sub>:

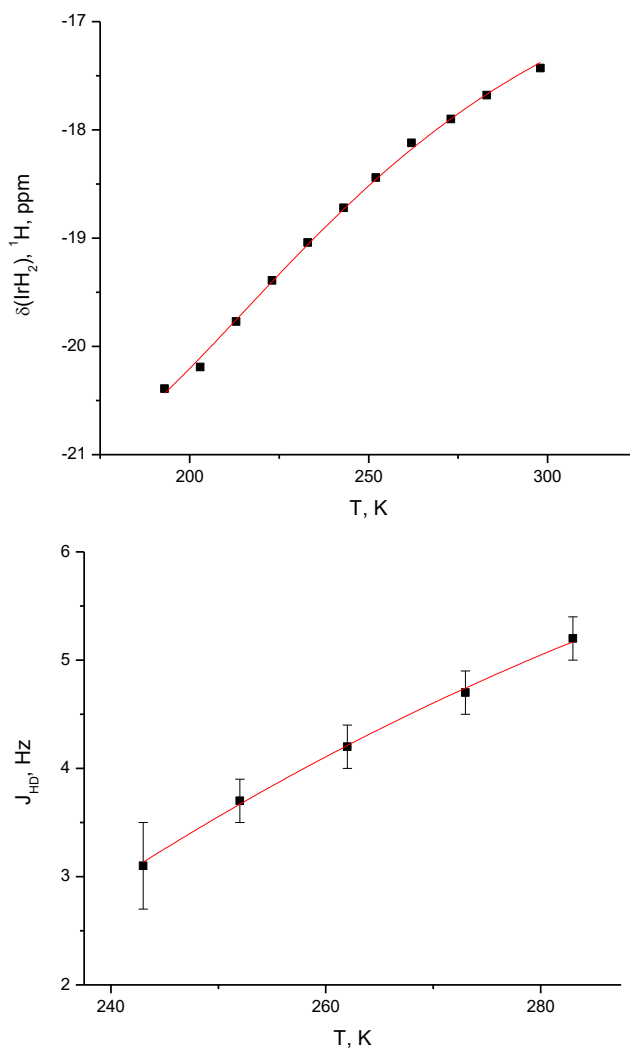

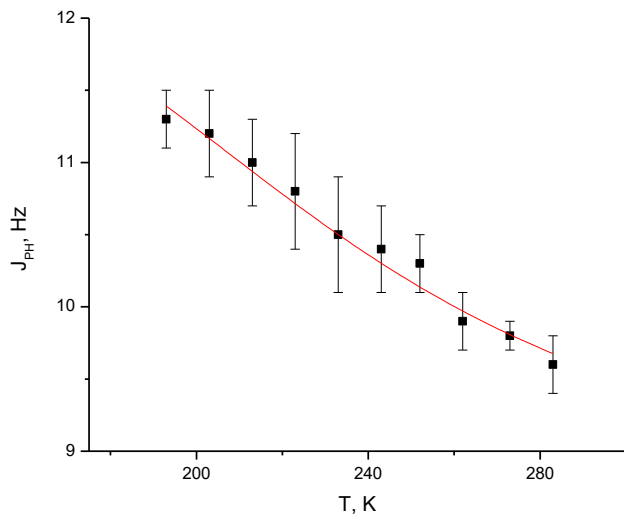

**Figure S20.** A two-component model (**S** and **NS-bound**) fit of variable temperature NMR spectra of (*m*-bis- $\text{CF}_3$ -POCOP) $\text{IrH}_2$  in  $\text{CD}_2\text{Cl}_2$ .  $^1\text{H}$  chemical shifts, as well as  $J_{\text{HD}}$  and  $J_{\text{PH}}$  are fitted.

**Complex (*p*-MeOOC-POCOP) $\text{IrH}_2$  in  $\text{CD}_2\text{Cl}_2$ :**

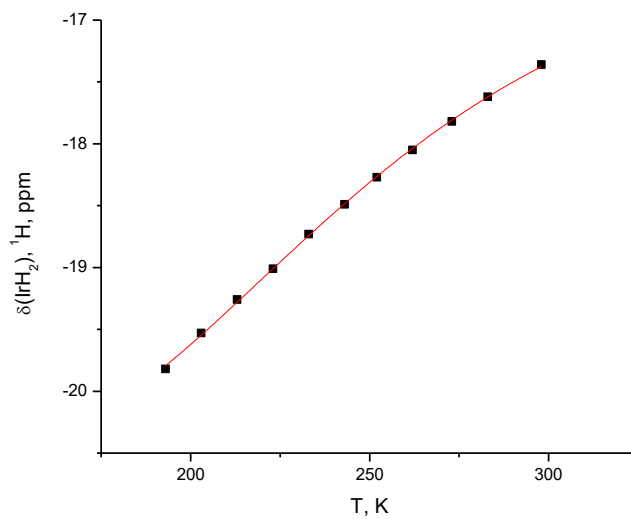

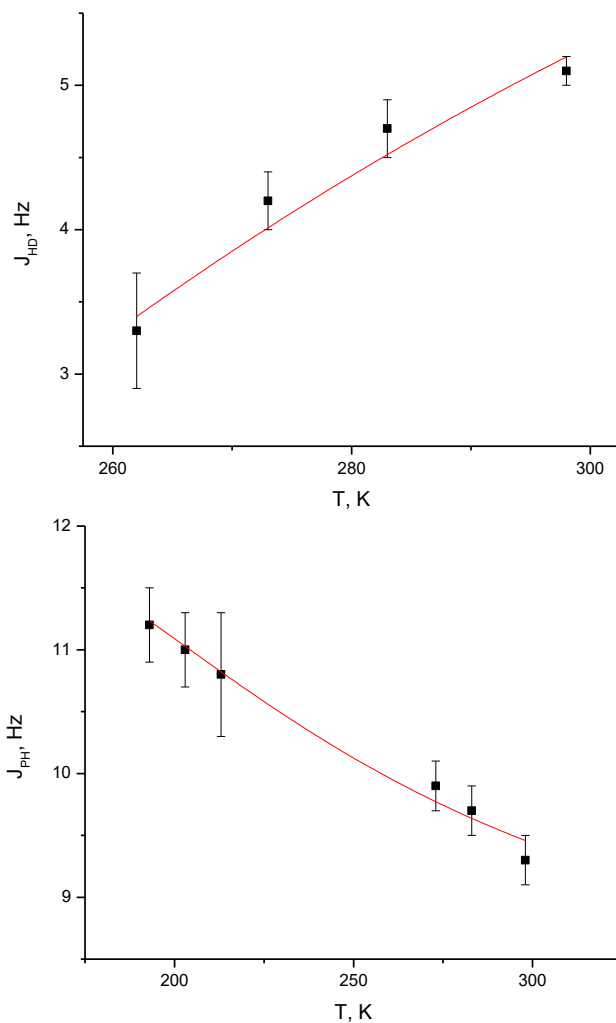

**Figure S21.** A two-component model (**S** and **NS-bound**) fit of variable temperature NMR spectra of  $(p\text{-MeOOC-POCOP})\text{IrH}_2$  in  $\text{CD}_2\text{Cl}_2$ .  $^1\text{H}$  chemical shifts, as well as  $J_{HD}$  and  $J_{PH}$  are fitted.

**Complex  $(p\text{-H-POCOP})\text{IrH}_2$  in  $\text{CD}_2\text{Cl}_2$ :**

Only  $^1\text{H}$  data was acquired and fitted.



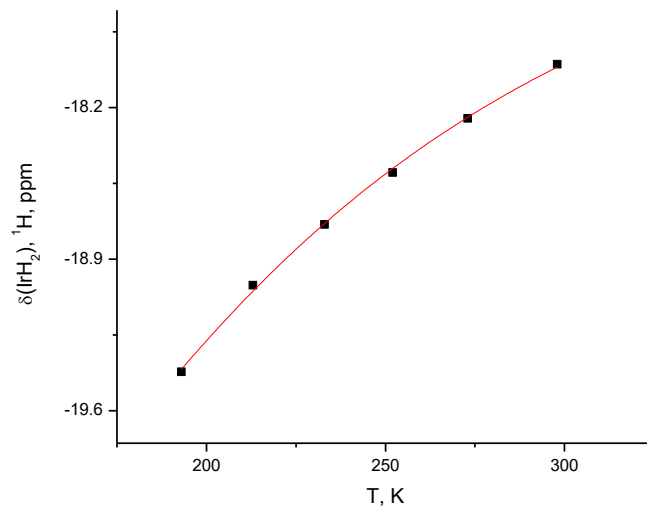

**Figure S22.** A two-component model (**S** and **NS-bound**) fit of variable temperature NMR spectra of  $(p\text{-H-POCOP})\text{IrH}_2$  in  $\text{CD}_2\text{Cl}_2$ .  $^1\text{H}$  chemical shifts are fitted.

**Complex  $(p\text{-MeO-POCOP})\text{IrH}_2$  in  $\text{CD}_2\text{Cl}_2$ :**

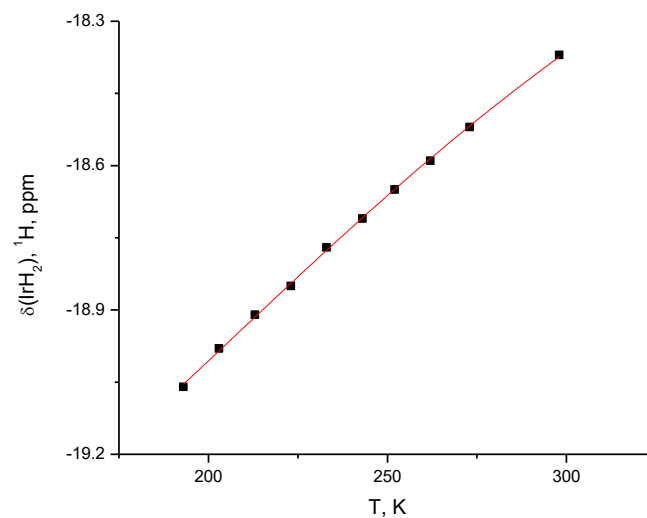

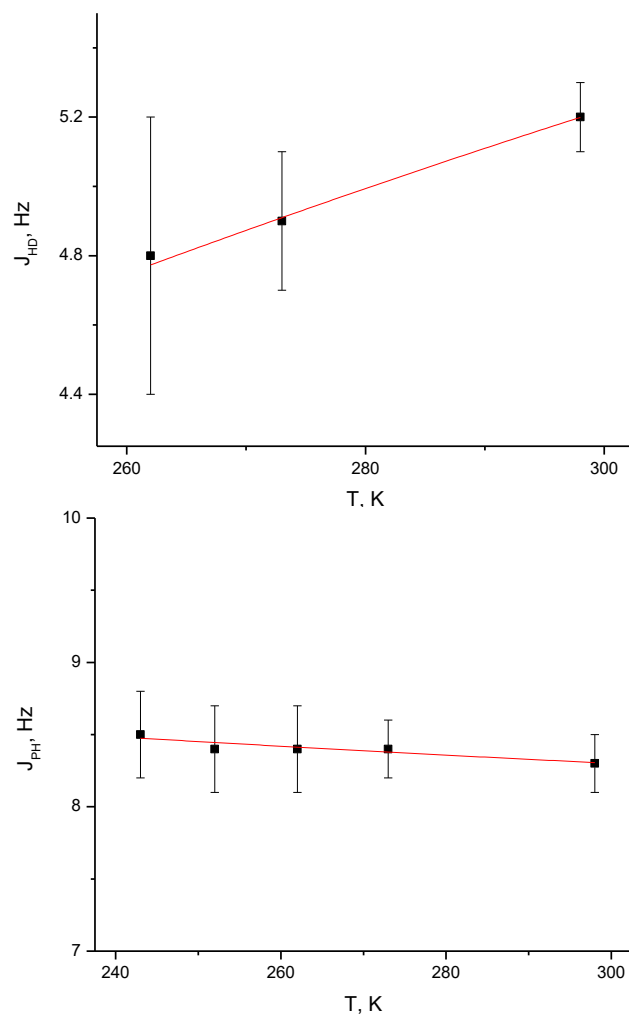

**Figure S23.** A two-component model (**S** and **NS-bound**) fit of variable temperature NMR spectra of  $(p\text{-MeO-POCOP})\text{IrH}_2$  in  $\text{CD}_2\text{Cl}_2$ .  $^1\text{H}$  chemical shifts, as well as  $J_{HD}$  and  $J_{PH}$  are fitted.

**Table S10.** Experimental and calculated parameters of dihydrogen bonding of (X-POCOP)IrH<sub>2</sub> with CH<sub>2</sub>Cl<sub>2</sub>. Energies versus **S** structures are provided. Note that the thermodynamic corrections to electronic energy E might be somewhat overestimated for a weakly bound adduct, so we provide both  $\Delta E$  and  $\Delta H$ . It could be that here  $\Delta E$  is more appropriate to compare with the experimental values.

| $\delta_H(\mathbf{S})$  | -16.1 | -16.0 | -15.1  | -15.6 | -       |
|-------------------------|-------|-------|--------|-------|---------|
| $\delta_H(\mathbf{NS})$ | -19.5 | -21.3 | -21.5  | -22.0 | -       |
| $J_{HD}, \mathbf{S}$    | 9.5   | -     | 11.7   | 9.4   | -       |
| $J_{HD}, \mathbf{NS}$   | 3.0   | -     | -6.3   | -3.5  | -       |
| $J_{PH}, \mathbf{S}$    | 7.2   | -     | 7.8    | 8.4   | -       |
| $J_{PH}, \mathbf{NS}$   | 8.9   | -     | 12.4   | 12.3  | -       |
| H(exp)-fit              | -1.3  | -1.2  | -1.8   | -2.3  | -       |
| S(exp)-fit              | -2.9  | -4.9  | -7.1   | -9.5  | -       |
| E(calc)<br>*            | -1.7  | -2.3  | -1.2** | -3.8  | -4.5    |
| H(calc)                 | -0.1  | -0.7  | +0.3** | -2.7  | -2.9*** |

\*E refers to electronic energies at BS1//D3BJ-revPBE geometries with 2/3-extrapolation//DLPNO-CCSD(T) single point corrections, in kcal/mol. \*\* Given versus **NS** since calculations suggest **S** is a transition state. \*\*\* Due to comparatively low stability of (PCP)IrH<sub>2</sub> in CH<sub>2</sub>Cl<sub>2</sub>, and thus reduced temperatures span, experimental binding energies were not determined.

### 8. A control experiment evaluating the effect of relative permittivity on (*p*-H-POCOP)IrH<sub>2</sub>

For the measurements, solutions of partially deuterated (*p*-H-POCOP)IrH<sub>2</sub> in CD<sub>2</sub>Cl<sub>2</sub> and THF-*d*<sub>8</sub> under Ar atmosphere were prepared. After NMR recording was complete, the NMR tubes were transferred to a glovebox, where NBu<sub>4</sub>PF<sub>6</sub> was added to create solutions with 0.05 M and 0.5 M concentrations of NBu<sub>4</sub>PF<sub>6</sub>. The NMR tubes were vigorously shaken to dissolve NBu<sub>4</sub>PF<sub>6</sub>, degassed and refilled with Ar, and then NMR spectra were recorded again. As follows from Table 1 in the manuscript, no changes were detected. In particular,  $\Delta\delta$  is very sensitive to environment and can be measured with high precision, however the values with and without NBu<sub>4</sub>PF<sub>6</sub> were virtually the same. We thus conclude that changes in relative permittivity do not affect **S-NS** equilibrium to an extent that is suggested by DFT calculations. We ascribe this discrepancy to imperfections of the continuum solvation model used.

As a control, we used a solvatochromic dye, namely Brooker's merocyanine. As can be seen from Figure S24, addition of NBu<sub>4</sub>PF<sub>6</sub> to CH<sub>2</sub>Cl<sub>2</sub> solutions clearly caused visually detectable changes.

|                                            |      |      |      |      |      |
|--------------------------------------------|------|------|------|------|------|
| <b>C(NBu<sub>4</sub>PF<sub>6</sub>), M</b> | 0    | 0.01 | 0.05 | 0.1  | 0.5  |
| <b><math>\epsilon</math></b>               | 8.93 | 9.77 | 12.4 | 14.1 | 24.2 |

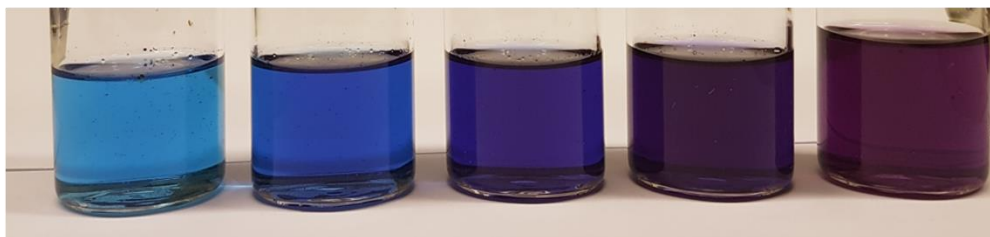

**Figure S24.** The effect of relative permittivity on Brooker's merocyanine dye solution in CH<sub>2</sub>Cl<sub>2</sub> in a control experiment. Upon addition of NBu<sub>4</sub>PF<sub>6</sub> the relative permittivity is changed from 8.93 to 24.2,<sup>20</sup> resulting in color change from light-blue to violet. Worth noting is that solution of the dye in acetone with  $\epsilon=20.7$  is also violet.

## 9. Computational details

### 9.1 General considerations

DFT calculations were performed with ORCA 4.1.1,<sup>21</sup> using revPBE functional<sup>22</sup> with D3BJ dispersion correction<sup>23,24</sup> with TightSCF and TightOpt settings. For geometry optimization and frequencies, the def2-SVP basis set<sup>25</sup> was used for C, P, O and H atoms, while def2-TZVP<sup>25</sup> basis set was used for Ir, and ma-def2-TZVP<sup>26</sup> for H atoms in hydride positions (further on this combination is named BS1). The RI algorithm with automatic generation of auxiliary basis sets<sup>27</sup> was used. Solvent effects were incorporated using the CPCM solvation model<sup>28</sup> with toluene and CH<sub>2</sub>Cl<sub>2</sub> used as solvents. Grid6 and where necessary GridX6 were used throughout all calculations.

Single-point energies were calculated using DLPNO-CCSD(T)<sup>29</sup> method with def2-TZVP<sup>25</sup> basis set. For a few complexes a 2/3 extrapolation to complete basis set was performed, which indicated that with def2-TZVP a reasonable convergence is achieved. The exceptions were adducts with CH<sub>2</sub>Cl<sub>2</sub> and CF<sub>3</sub>H; for these compounds, energies are given at 2/3 extrapolation to complete basis set level, instead of def2-TZVP.

We have examined the effect of different basis sets (def2-SVP<sup>25</sup>, BS1 [see above], def2-TZVP<sup>25</sup>, (SARC)-ZORA-def2-TZVP<sup>30</sup> with ZORA approximation<sup>31</sup>, ma-def2-SVP,<sup>26</sup> def2-TZVPD<sup>32</sup>; Figure S26), DFT functionals (PBE0<sup>33</sup>, M06L<sup>34</sup>, TPSS<sup>35</sup>, M06<sup>36</sup>,  $\omega$ B97X-D3BJ<sup>37</sup> as well as DLPNO-SCS-MP2<sup>38</sup>; Figure S29), solvation models (CPCM, SMD, vacuum; Figure S28) and solvents (vacuum, toluene, CH<sub>2</sub>Cl<sub>2</sub>, EtOH; Figure S27). Overall, virtually all levels of theory are consistent with **S/NS** model and provide reasonable convergence of results with respect to geometries and energy gap between **S** and **NS**. The chosen model, BS1//D3BJ-revPBE with def2-TZVP//DLPNO-CCSD(T) single point energies, combines accuracy with a reasonable computational cost, which was near the prohibitive limit for the biggest structures studied (i.e. **NS-bound-c** for *m-bis*-CF<sub>3</sub>-POCOP)IrH<sub>2</sub>---2×IC<sub>6</sub>F<sub>5</sub>.

**Additional notes regarding the continuum solvation model.** On a few occasions we observed in fact very minor, but seemingly relevant discrepancies between computational and experimental data. One of such occasions is the effect of a solvent relative permittivity. Thus, computationally, in CH<sub>2</sub>Cl<sub>2</sub> ( $\epsilon = 8.93$ ) complex (*p*-H-POCOP)IrH<sub>2</sub> exhibits  $r(\text{H-H})$  of 1.62 and 2.05 Å for **S** and **NS** structures. The electronic energy difference is -0.53 kcal/mol at BS1//D3BJ-revPBE level (-1.13 kcal/mol with DLPNO-CCSD(T) correction), favoring **NS**. When  $\epsilon$  was set to 24.2, which corresponds to 0.5 M solution of NBu<sub>4</sub>PF<sub>6</sub> in CH<sub>2</sub>Cl<sub>2</sub> (ref. 44 in the manuscript), the distances changed to 1.63 and 2.07 Å, respectively, while the energy gap changed to -0.69 kcal/mol at BS1//D3BJ-revPBE (-1.38 kcal/mol with DLPNO-CCSD(T) correction). The difference between  $\delta(\text{IrH}_2)$  and  $\delta(\text{IrHD})$  in the NMR spectra is very sensitive to the amount of **NS** and can be measured with high accuracy. Thus, we expected that the -0.16 (-0.25) kcal/mol difference, additionally accompanied by structural changes, would be revealed in the NMR spectra, however this was not the case. On the other hand, a solvatochromic dye used as a benchmark clearly demonstrated changes in the control experiment (see section 8). Hence, although Ir-H bonds may have comparatively high polarizability, the changes that are predicted by calculations are clearly bigger than those seen in the experiment.

Other minor deviation is geometry of **S** for (*p*-H-POCOP)IrH<sub>2</sub> ( $r(\text{H-H}) = 1.60 \text{ \AA}$  BS1//D3BJ-revPBE,  $1.62 \pm 0.05 \text{ \AA}$  def2-TZVP//DLPNO-CCSD(T)-corrected, 1.48-1.65  $\text{\AA}$  for other DFT functionals tested, 1.43(2)  $\text{\AA}$  experimental at 10 K). Remarkably, DLPNO-CCSD(T) does not really cure the distance. Complications with multireference nature of the wavefunction seem unlikely based on “T1 indicator” (see section 9.4). Thus, in view of the above-mentioned evaluation of relative permittivity effect, our guess is that the discrepancies could be due to small solvation or packing effects that are not fully accounted for by a continuum solvation model. There are precedents when such inaccuracies introduce data scattering and cancel out the benefits of using the DLPNO-CCSD(T). As mentioned in ref. 60 (in the manuscript) “...the errors in solvation energy remove much of the advantage in employing more consistently accurate wave function-based methods since they overshadow the improved electronic energies that these methods yield compared to DFT”. We attempted to model the environment near Ir atom through placing four <sup>t</sup>Bu<sub>2</sub>P(OMe) groups (with -OMe instead of -O-pincer) near IrH<sub>2</sub> side of the molecule into positions taken from crystallographic studies. Optimization of hydrogens with heavy atoms constrained led to  $r(\text{H-H}) = 1.52 \text{ \AA}$ , which is closer to the experimental distance. It could be that a better modelling of packing/solvation effects will lead to further improvements. In any case, according to PES scan the energetic difference between the experimental and calculated positions is less than 1 kcal/mol, which makes it challenging to carefully account for all possible reasons of this small deviation.

## 9.2 Additional computational data

**Additional notes on halogen bonding with C<sub>6</sub>F<sub>5</sub>I.** The variety of possible interactions between (X-POCOP)IrH<sub>2</sub> and C<sub>6</sub>F<sub>5</sub>I is exemplified on Figure 8 in the manuscript. Moreover, **NS-bound-a** can exist as two isomers, **NS-bound-a1** and **NS-bound-a2**. Hydrogen-hydrogen bond lengths and binding energies are listed in Table S11.

**Table S11.** Binding of C<sub>6</sub>F<sub>5</sub>I and (X-POCOP)IrH<sub>2</sub> and (PCP)IrH<sub>2</sub>. Hydrogen-hydrogen bond lengths and binding energies for **NS-bound-a1** and **NS-bound-a2** isomers.

| X =                                   | <i>p</i> -MeO- | <i>p</i> -H- | <i>p</i> -MeOOC | <i>m</i> -bis-CF <sub>3</sub> - | (PCP)IrH <sub>2</sub> |
|---------------------------------------|----------------|--------------|-----------------|---------------------------------|-----------------------|
| <i>r</i> (H-H) <b>NS-bound-a1</b> , Å | 2.25           | 2.36         | 2.38            | 2.35                            | 2.45 (tilted)         |
| <i>r</i> (H-H) <b>NS-bound-a2</b> , Å | 2.01           | 2.16         | 2.22            | 2.19                            | 2.27 (flat)           |
| ΔH <b>NS-bound-a1</b> , kcal/mol      | -1.8           | -3.1         | -4.5            | -3.8                            | -5.1                  |
| ΔH <b>NS-bound-a2</b> , kcal/mol      | -3.9           | -4.9         | -6.7            | -6.2                            | -4.7                  |

As mentioned in the manuscript text, D3BJ-revPBE seemingly over-binds (*p*-MeOOC-POCOP)IrH<sub>2</sub>---IC<sub>6</sub>F<sub>5</sub> adduct (**NS-bound-a2**) and other halogen-bonded adducts. This is reflected by a shorter *r*(H<sub>eq</sub>-I) distance in calculated structure compared to the experimental one (see Table S12). Also, D3BJ-revPBE binding energy of -12.0 kcal/mol is unreasonably high. Geometry of the adduct is better captured by DLPNO-SCS-MP2 (Table S12). However, this method is too costly for a more detailed study. Fortunately, DLPNO-CCSD(T) correction well cures the interaction energy with D3BJ-revPBE geometry (-7.3 kcal/mol), such as that it is close to DLPNO-SCS-MP2// DLPNO-CCSD(T) energy (-6.5 kcal/mol).

**Table S12.** Accuracy of some computational methods for predicting geometry of (*p*-MeOOC-POCOP)IrH<sub>2</sub>---IC<sub>6</sub>F<sub>5</sub> adduct (**NS-bound-a2**)

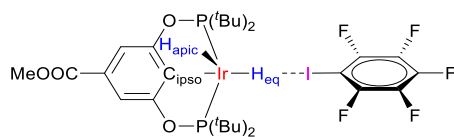

|                                           | Neutron diffraction | D3BJ-revPBE | DLPNO-SCS-MP2 |
|-------------------------------------------|---------------------|-------------|---------------|
| <i>r</i> (H-H), Å                         | 2.22                | 2.22        | 2.20          |
| <i>r</i> (H <sub>eq</sub> -I), Å          | 2.51                | 2.27        | 2.55          |
| <i>r</i> (H <sub>apic</sub> -I), Å        | 3.92                | 3.67        | 3.54          |
| <i>r</i> (H <sub>eq</sub> -Ir), Å         | 1.65                | 1.69        | 1.66          |
| <i>r</i> (H <sub>apic</sub> -Ir), Å       | 1.51                | 1.54        | 1.52          |
| <i>r</i> (C <sub>ipso</sub> -Ir)          | 2.01                | 2.06        | 2.05          |
| <i>r</i> (Ir-I)                           | 4.06                | 3.84        | 3.95          |
| H <sub>apic</sub> -Ir-H <sub>eq</sub> , ° | 89.0                | 86.5        | 87.7          |
| C <sub>ipso</sub> -Ir-I, °                | 165.9               | 170.3       | 161.9         |

### Additional notes on S/NS equilibrium in CH<sub>2</sub>Cl<sub>2</sub>.

**Table S13.** Calculated distances and energies relevant to **S** and **NS** structures in (X-POCOP)IrH<sub>2</sub> complexes in CH<sub>2</sub>Cl<sub>2</sub>.

| X =                                                     |                        | <i>p</i> -MeO- | <i>p</i> -H- | <i>p</i> -MeOOC- | <i>m</i> -bis-CF <sub>3</sub> - | (PCP)IrH <sub>2</sub> |
|---------------------------------------------------------|------------------------|----------------|--------------|------------------|---------------------------------|-----------------------|
| <i>r</i> (H-H) in <b>S</b> , calc., Å                   | revPBE                 | 1.66           | 1.62         | 1.58**           | 1.59                            | 1.49                  |
| <i>r</i> (H-H) in <b>NS</b> , calc., Å                  | revPBE                 | 1.67           | 2.05         | 2.13             | 2.10                            | 2.26                  |
| $\Delta$ H-calc, kcal/mol                               | revPBE                 | +1.6           | -0.4         | -1.1**           | -1.2                            | -1.1                  |
|                                                         | revPBE//DLPNO-CCSD(T)* | +1.7 (+2.1)    | -1.0 (-1.4)  | -2.2** (-3.0)    | -2.2 (-2.7)                     | -1.9 (-2.4)           |
| $\Delta$ S-calc, cal×mol <sup>-1</sup> ×K <sup>-1</sup> | revPBE                 | -1.1           | -2.8         | -0.6**           | -3.7                            | -5.5                  |

\*\* The respective electronic energies were obtained using BS1//D3BJ-revPBE geometries with def2-TZVP//DLPNO-CCSD(T) single point corrections. In parenthesis the values corresponding to 2/3-extrapolation//DLPNO-CCSD(T) are given for compatibility with Table S10.\*\* **S** structure appears to be a transition state.

**Additional notes on dihydrogen bonding with CH<sub>2</sub>Cl<sub>2</sub>.** Just as it was for C<sub>6</sub>F<sub>5</sub>I, there are numerous ways of interaction between CH<sub>2</sub>Cl<sub>2</sub> and (X-POCOP)IrH<sub>2</sub>. Initially, complex (*p*-H-POCOP)IrH<sub>2</sub> was studied, and several isomers were found that are depicted below.

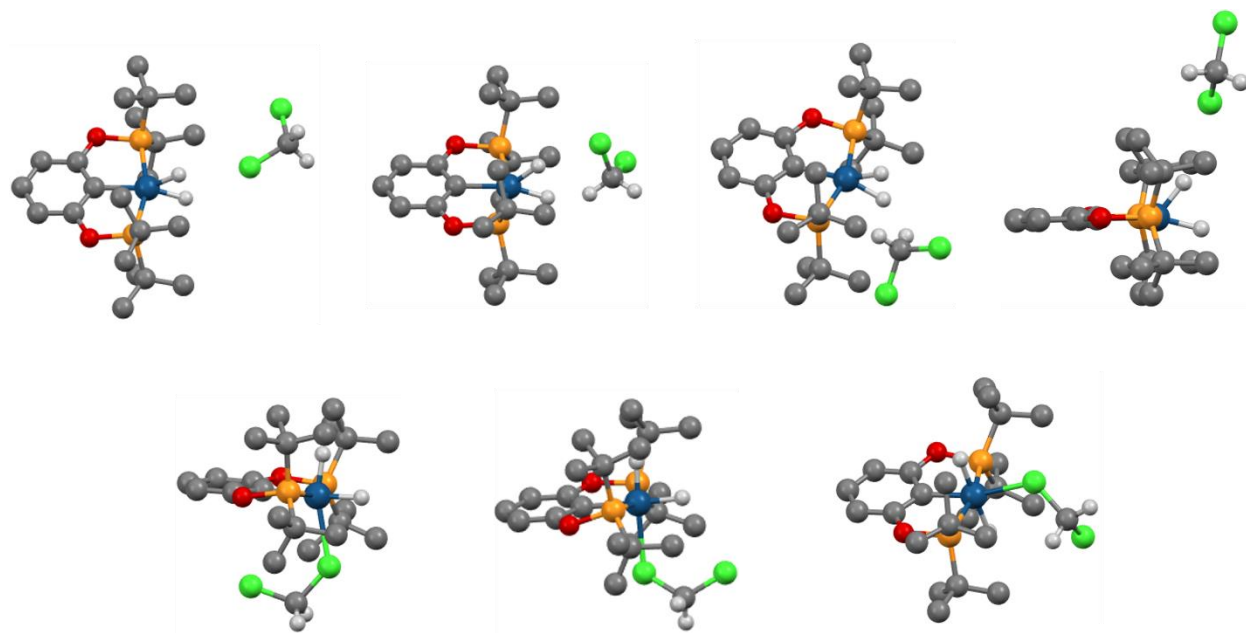



Of those, the lowest-energy isomer with dihydrogen bond as well as the lowest-energy isomer with halogen bond were chosen for a more detailed evaluation. As it was for C<sub>6</sub>F<sub>5</sub>I, D3BJ-revPBE seemingly over-binds the adducts (thus, for (*p*-MeOOC-POCOP)IrH<sub>2</sub>---CH<sub>2</sub>Cl<sub>2</sub> calculated  $r(\text{IrH} \cdots \text{H}-\text{CHCl}_2)$  is 1.84 Å versus ca. 2 Å derived from  $T_1(\text{min})$ ). Other methods such as DLPNO-SCS-MP2 and M06L predict  $r(\text{IrH} \cdots \text{H}-\text{CHCl}_2)$  in a more precise way, for example for M06L the calculated  $r(\text{IrH} \cdots \text{H}-\text{CHCl}_2)$  in (*p*-MeOOC-POCOP)IrH<sub>2</sub>---CH<sub>2</sub>Cl<sub>2</sub> is 2.09 Å and  $r(\text{H}-\text{H})$  is 2.08 Å, in a good agreement with the experimental data from  $T_1(\text{min})$ . However, those methods have other problems, for example DLPNO-SCS-MP2 strongly underestimates **NS** energy, while M06L predicts the non-existent minimum in the dihydrogen complex region (see Figure S28). DLPNO-CCSD(T) corrections are given at 2/3 extrapolation level since in this case the difference between def2-TZVP and 2/3 extrapolation is significant (for example, -4.04 and -2.35 kcal/mol for (*p*-MeOOC-POCOP)IrH<sub>2</sub>---CH<sub>2</sub>Cl<sub>2</sub> formation). Table S10, where experimental and computational data are listed, in addition to  $\Delta H$  provides electronic energies, since the thermodynamic corrections, taken from D3BJ-revPBE, form a considerable fraction of the resulting enthalpies.

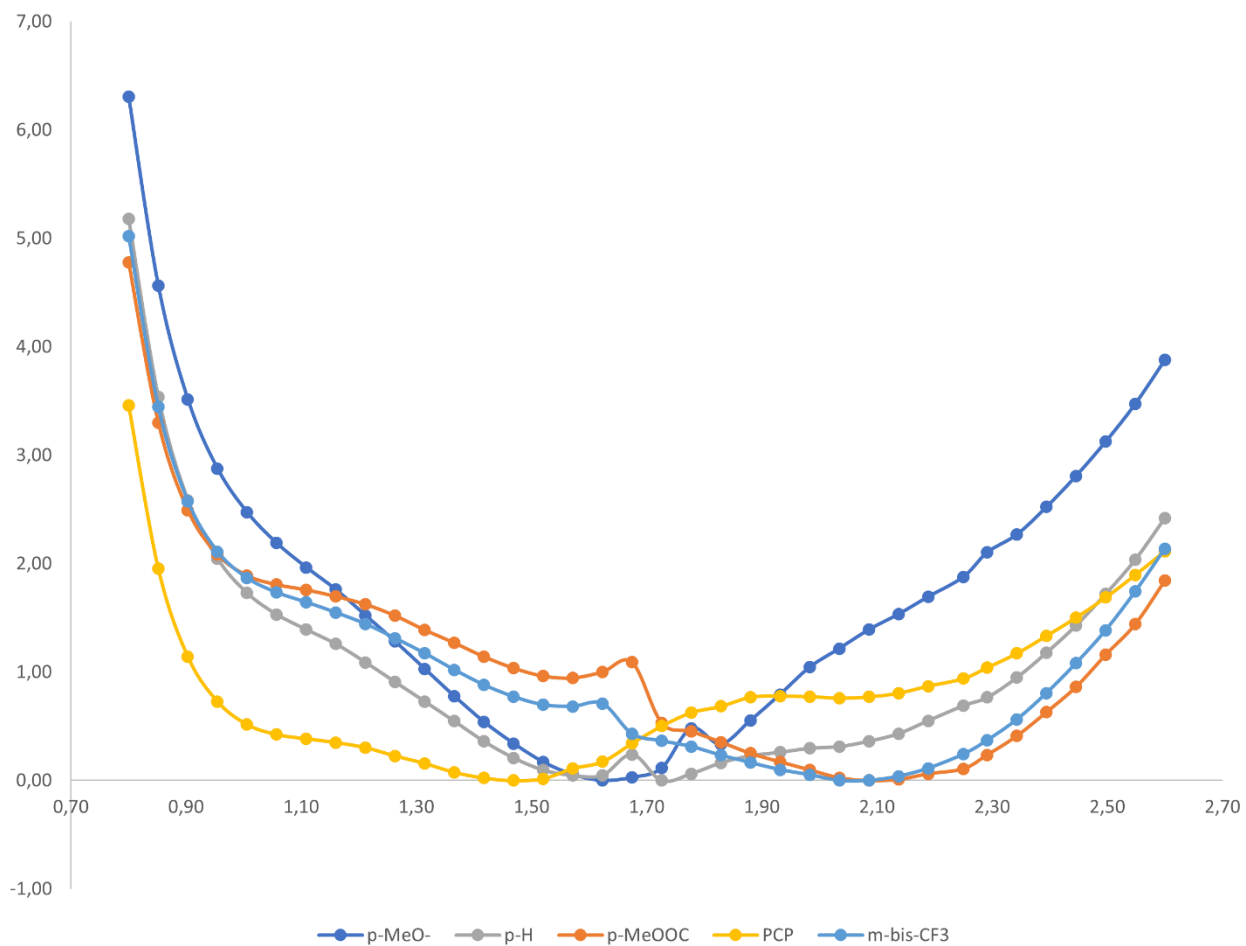

**Figure S25.** Dependence of potential energy surface in (X-POCOP)IrH<sub>2</sub> on X group, BS1//D3BJ-revPBE, solvent toluene. PES for (PCP)IrH<sub>2</sub> is also shown.

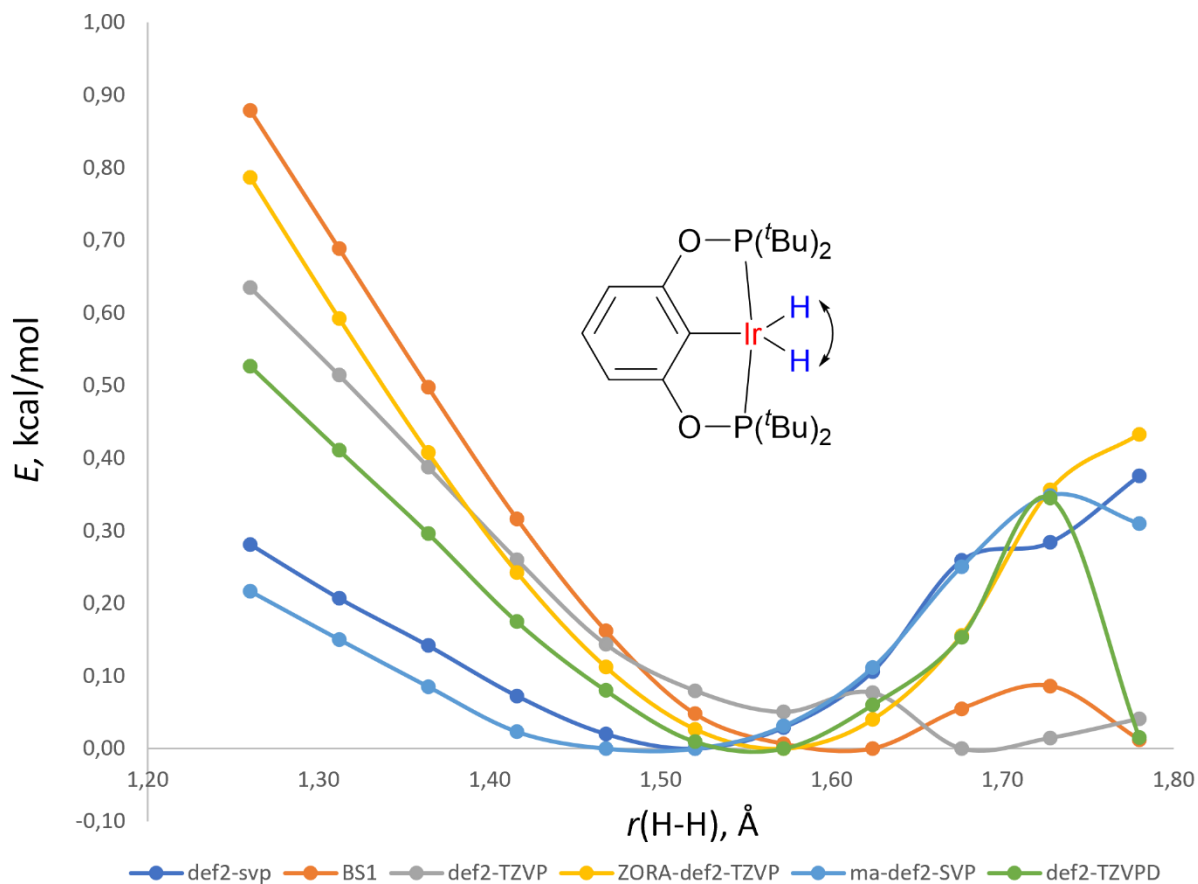

**Figure S26.** Basis set dependence of potential energy surface in the  $\mathbf{S}$  minimum region for  $(p\text{-H-POCOP})\text{IrH}_2$ . It can be seen that the chosen BS1 basis set reasonably well approximates larger sets such as def2-TZVPD, being significantly faster at the same time.

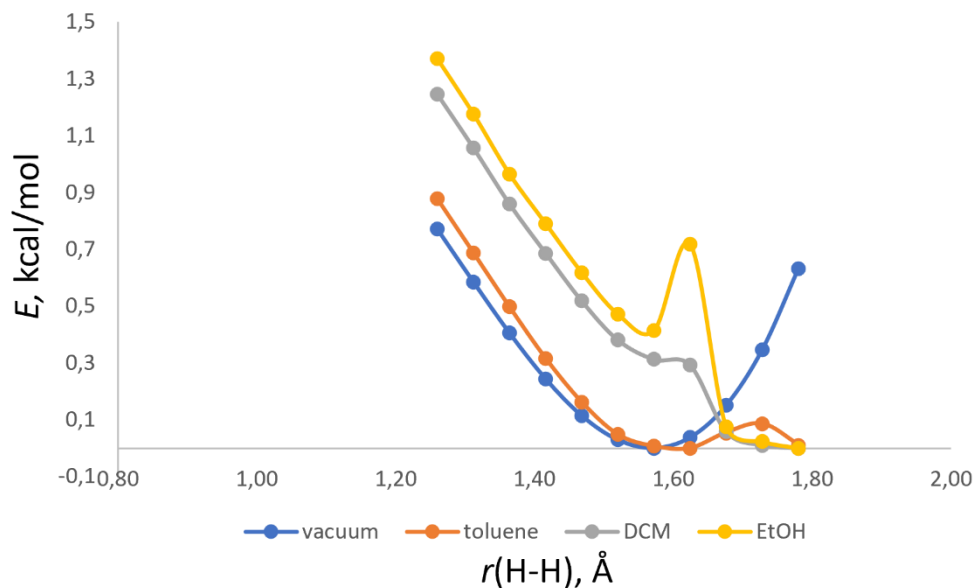

**Figure S27.** Solvent dependence of potential energy surface in the **S** minimum region for (*p*-H-POCOP)IrH<sub>2</sub>. De-symmetrisation of the **S** minimum region upon introducing the solvent effects is clearly observed. BS1 basis set was used.

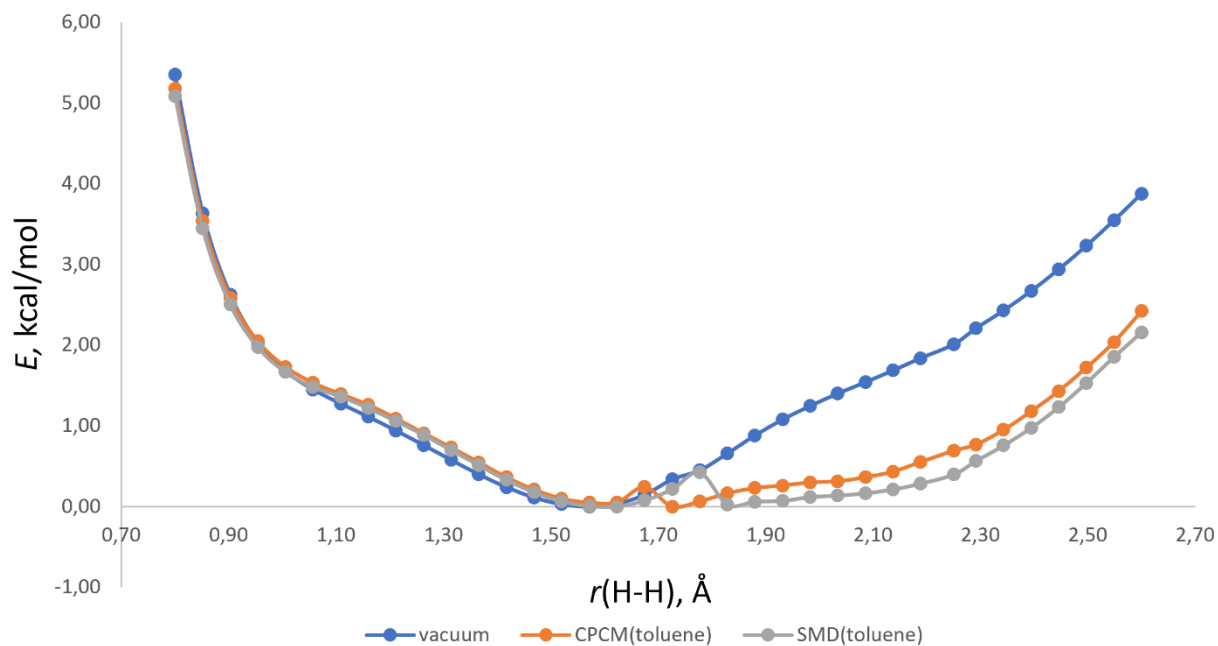

**Figure S28.** Potential energy surface scan in (*p*-H-POCOP)IrH<sub>2</sub> using CPCM and SMD solvation models at BS1//D3BJ-revPBE level of theory, compared to vacuum.

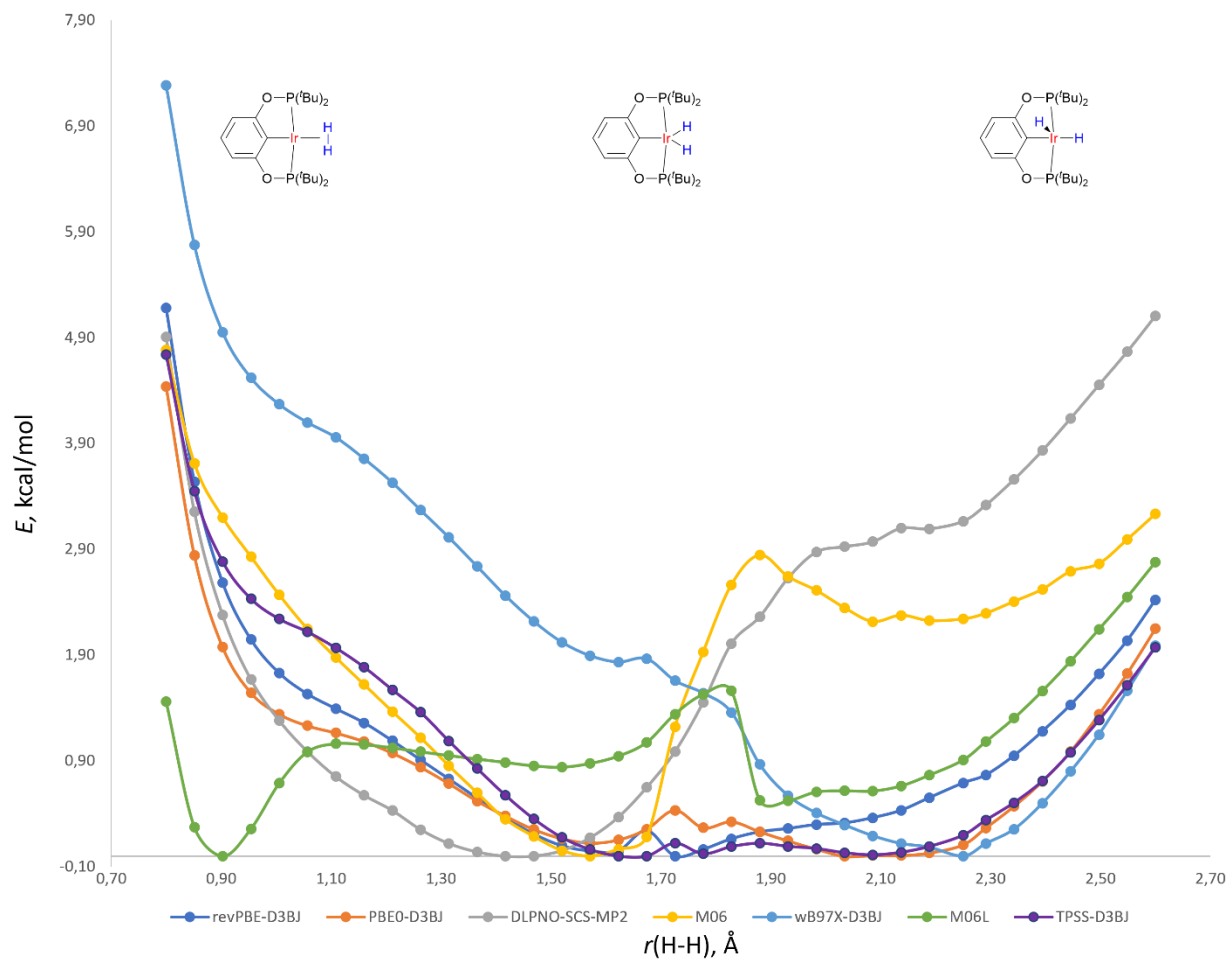

**Figure S29.** Potential energy surface scan in  $(p\text{-H-POCOP})\text{IrH}_2$  using several DFT functionals as well as DLPNO-SCS-MP2 method. BS1 basis set was used.

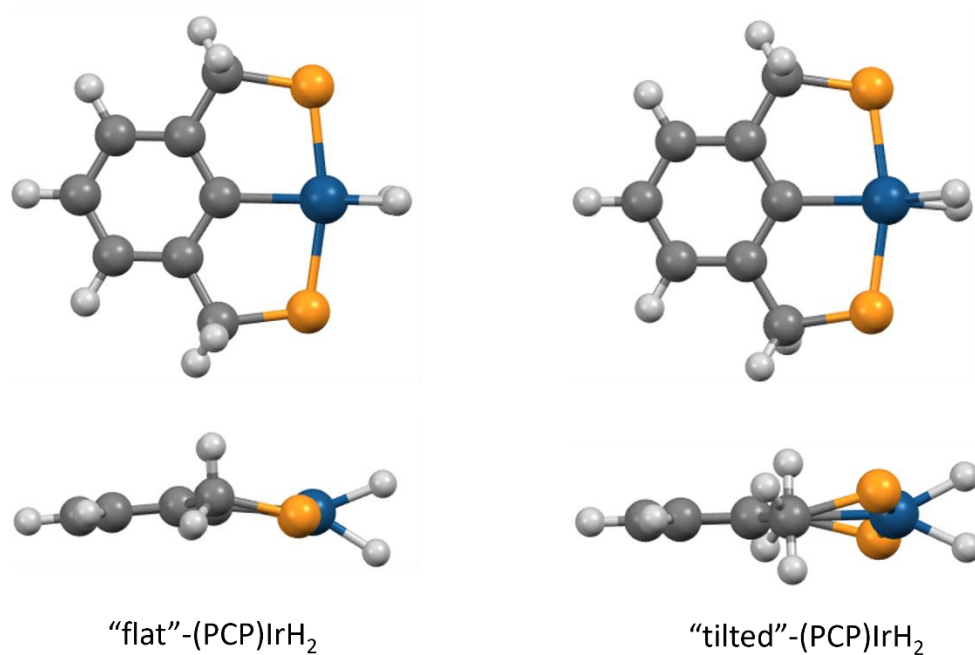

**Figure S30.** Tilted and flat isomers of (PCP)IrH<sub>2</sub>. *Tert*-butyl groups are omitted for clarity.

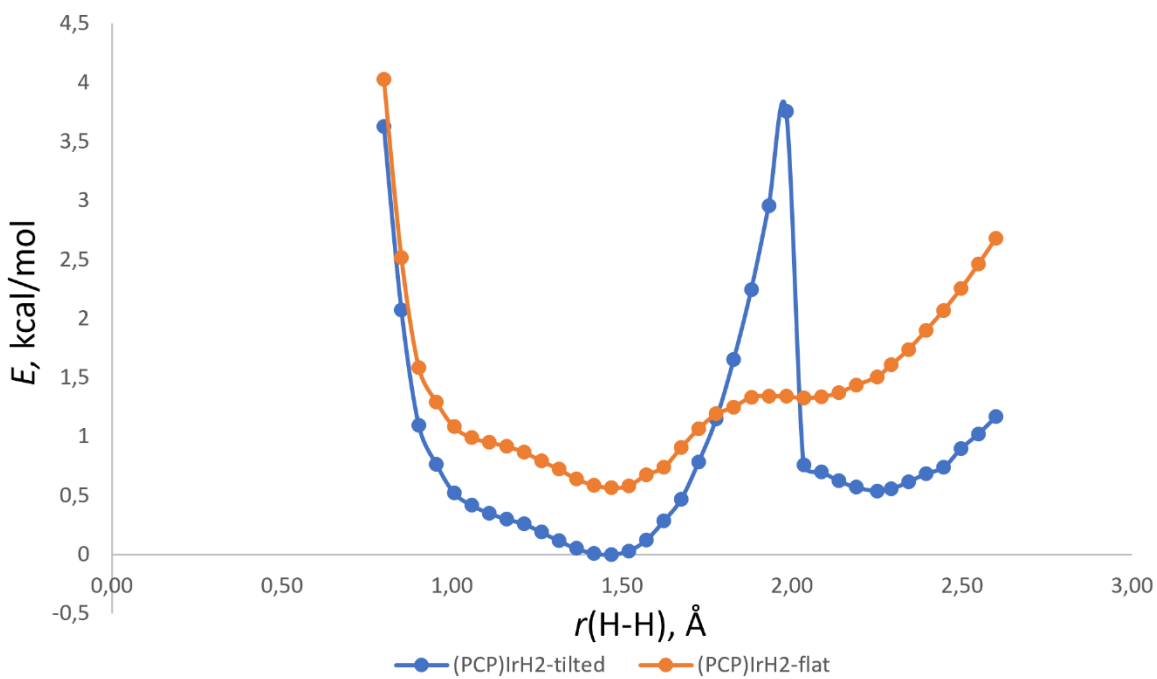

**Figure S31.** Potential energy surface scan in tilted and flat isomers of (PCP)IrH<sub>2</sub> at D3BJ-revPBE level of theory. BS1 basis was used.

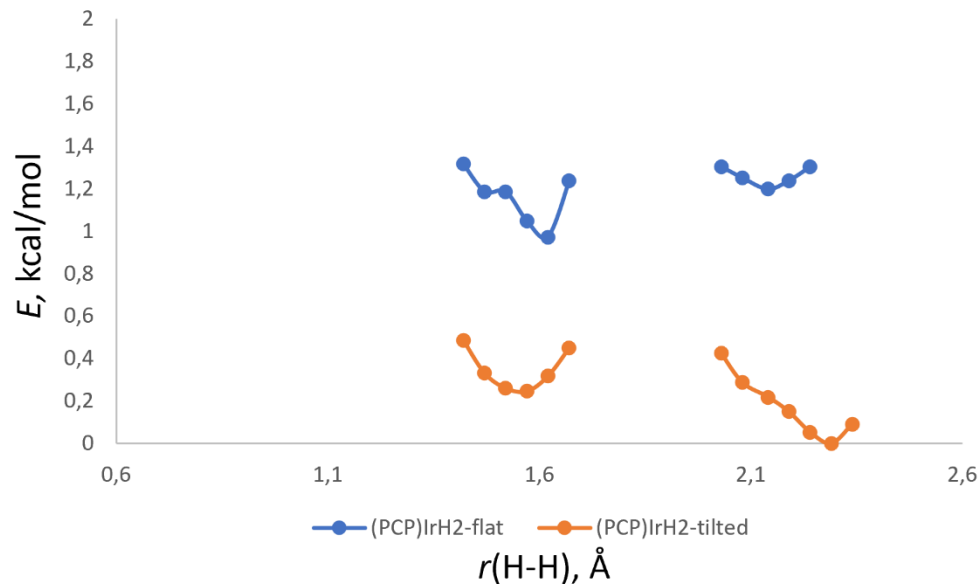

**Figure S32.** Potential energy surface scan in tilted and flat isomers of (PCP)IrH<sub>2</sub> at D3BJ-revPBE//DLPNO-CCSD(T) level of theory.

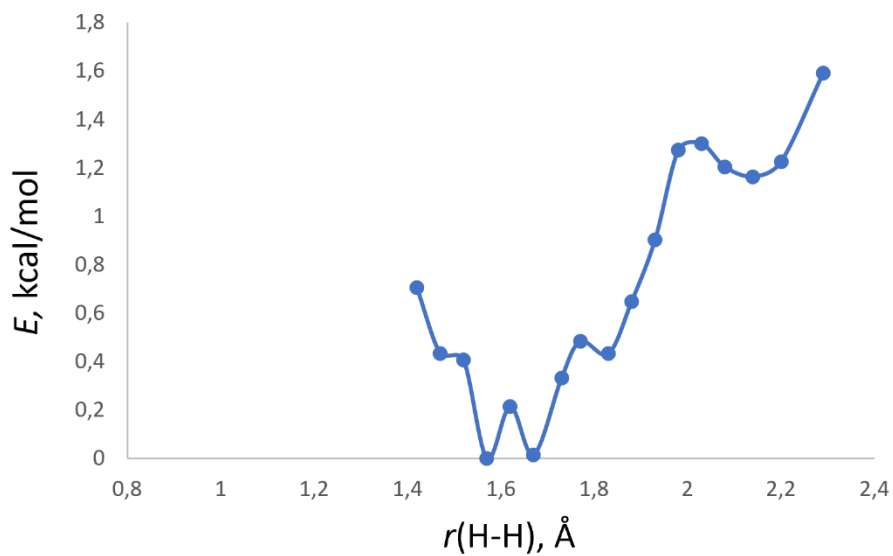

**Figure S33.** Potential energy surface scan in (*p*-MeO-POCOP)IrH<sub>2</sub> at D3BJ-revPBE//DLPNO-CCSD(T) level of theory.

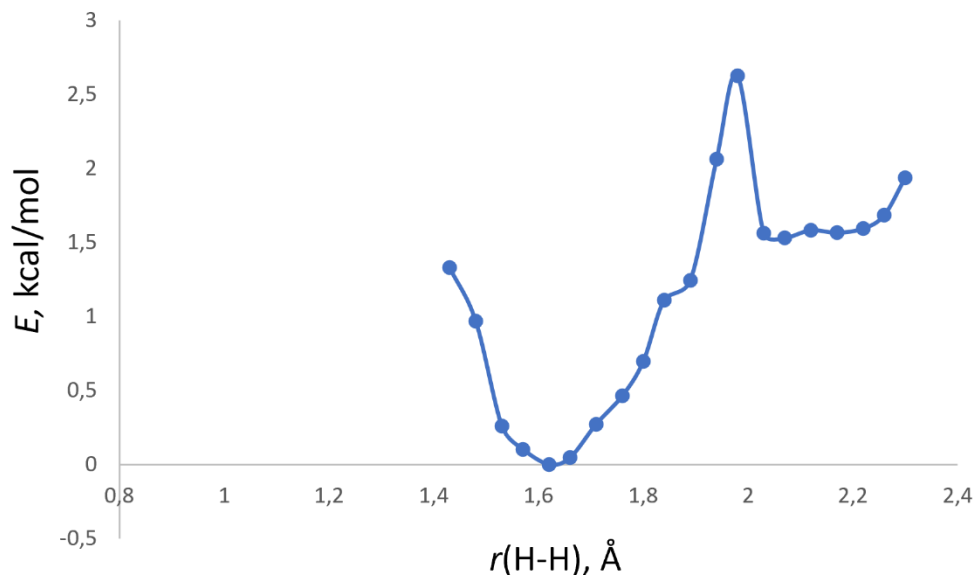

**Figure S34.** Potential energy surface scan in  $(p\text{-MeO-POCOP})\text{IrH}_2$  at DLPNO-SCS-MP2//DLPNO-CCSD(T) level of theory.

### 9.3 Explicit solvation attempts

We performed some attempts to see how explicit solvation could affect PES for  $(\text{X-POCOP})\text{IrH}_2$ . Although a single molecule of solvent added is not enough for a correct description, it can give an idea about possible interactions between hydrides and a solvent. For that purpose, a molecule of solvent was added in a close proximity to hydrides and H-H distance scan was performed without any constrains for the solvent added. Thus,  $\text{C}(\text{CH}_3)_4$  as a model of alkane solvent did not affect PES to a considerable effect (Figure S35). Benzene, as a model of aromatic solvent, induced some changes in PES (Figure S36). Benzene was found to form adducts with  $(\text{X-POCOP})\text{IrH}_2$ , such as depicted on Figure S35 where the benzene ring is orthogonal to  $\text{C}_{\text{ipso}}\text{-Ir}$  bond, or various “side-on” adducts, with binding energy of up to 3 kcal/mol. When the solvent with acidic hydrogen was added, modelled with  $\text{CHF}_3$ , formation of dihydrogen-bonded  $(\text{X-POCOP})\text{IrH}_2\cdots\text{HCF}_3$  adduct with elongated H-H bond was detected (Figure S37).



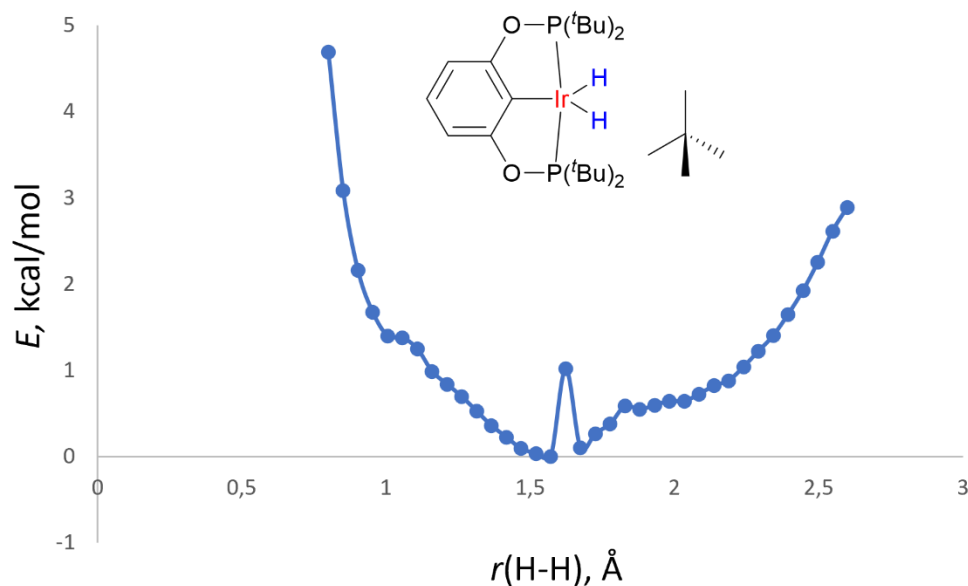

**Figure S35.** Potential energy surface scan in  $(p\text{-H-POCOP})\text{IrH}_2$  at D3BJ-revPBE level of theory with explicit molecule of  $\text{C}(\text{CH}_3)_4$  as alkane solvent model added. CPCM solvent toluene. The profile closely resembles the one without  $\text{C}(\text{CH}_3)_4$ . Little, in any interaction between solvent and  $(p\text{-H-POCOP})\text{IrH}_2$  can be noted. **S** and **NS** minima at  $1.57 \pm 0.05$  and  $1.67 \pm 0.05$  are close to  $1.60$  and  $1.63 \text{ \AA}$  respectively, observed without  $\text{C}(\text{CH}_3)_4$ .

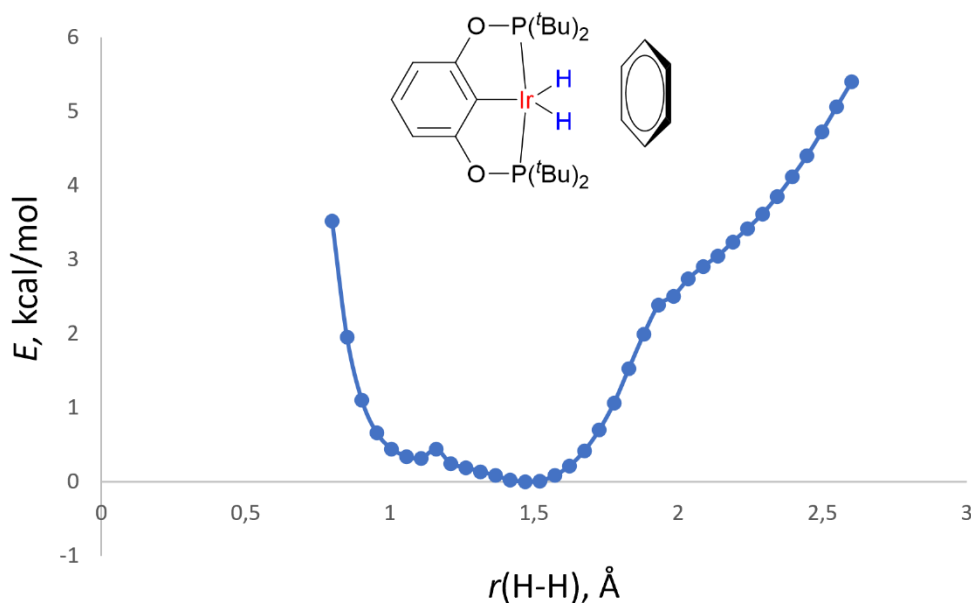

**Figure S36.** Potential energy surface scan in  $(p\text{-H-POCOP})\text{IrH}_2$  at D3BJ-revPBE level of theory with explicit molecule of benzene added. CPCM solvent toluene. The profile differs from the one without benzene added. There is an interaction between solvent and  $(p\text{-H-POCOP})\text{IrH}_2$ . **S** minimum is located at  $1.47 \pm 0.05 \text{ \AA}$  which is shorter than without  $\text{C}_6\text{H}_6$  ( $1.60 \text{ \AA}$ ).

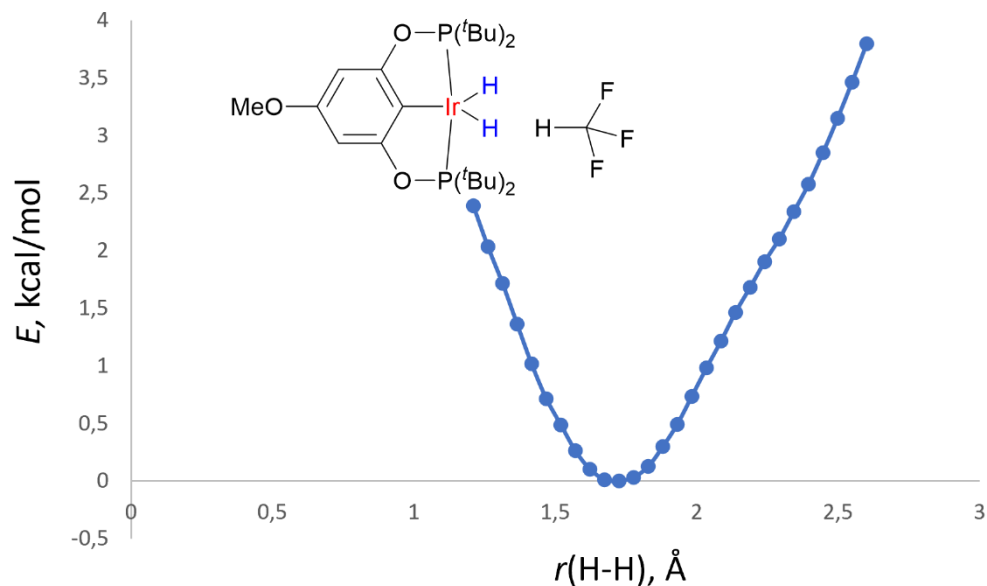

**Figure S37.** Potential energy surface scan in  $(p\text{-H-POCOP})\text{IrH}_2$  at D3BJ-revPBE level of theory with explicit molecule of  $\text{HCF}_3$  added. CPCM solvent toluene. The profile differs from the one without  $\text{HCF}_3$  added. There is an interaction (dihydrogen bond) between  $\text{HCF}_3$  and  $(p\text{-H-POCOP})\text{IrH}_2$ . **NS** minimum is located at  $1.72 \pm 0.05$  Å which is longer than without  $\text{HCF}_3$  (1.60 Å).

#### 9.4 Examining the possible multireference nature of $(\text{X-POCOP})\text{IrH}_2$ and $(\text{PCP})\text{IrH}_2$

So-called  $T_1$ -diagnostic (shall not be confused with NMR-related  $T_1(\text{min})$  used elsewhere in the manuscript) has been proposed as a multireference indicator when it comes to coupled cluster methods, such as DLPNO-CCSD(T). The value smaller than 0.05 is believed to be reliable for transition metal complexes<sup>39</sup>; a stricter threshold of 0.02 is suggested in ORCA manual. As is depicted on Figures S38-39, at all PES points  $T_1$ -diagnostic for  $(p\text{-H-POCOP})\text{IrH}_2$  and  $(\text{PCP})\text{IrH}_2$  is significantly lower than 0.02. Therefore, multireference character of the systems studied seems unlikely, although cannot be completely excluded.

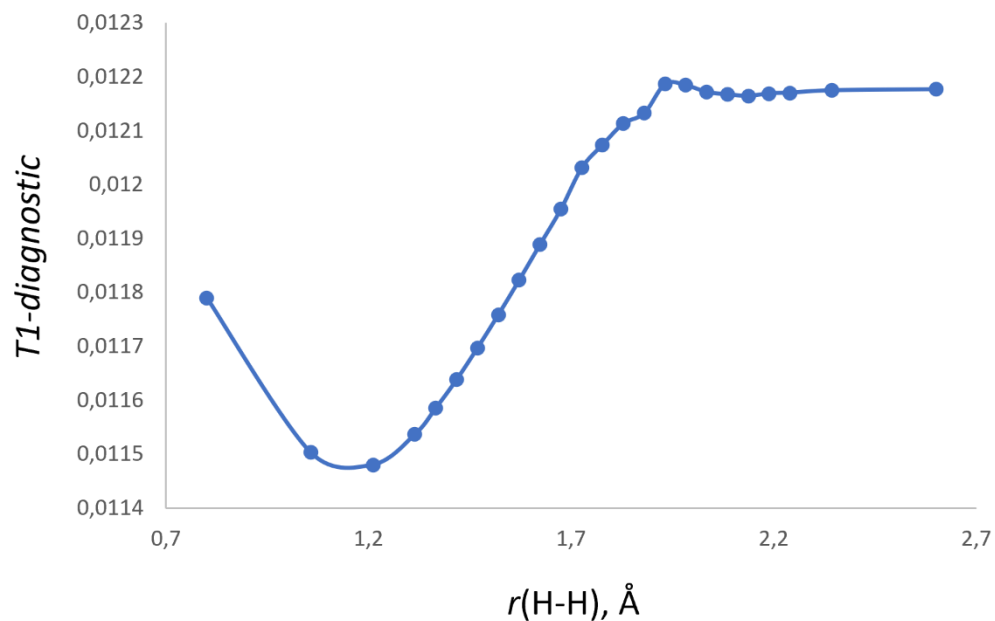

**Figure S38.** T1-diagnostic versus  $r(\text{H-H})$  in  $(p\text{-H-POCOP})\text{IrH}_2$ , calculated at D3BJ-revPBE//DLPNO-CCSD(T) level of theory.

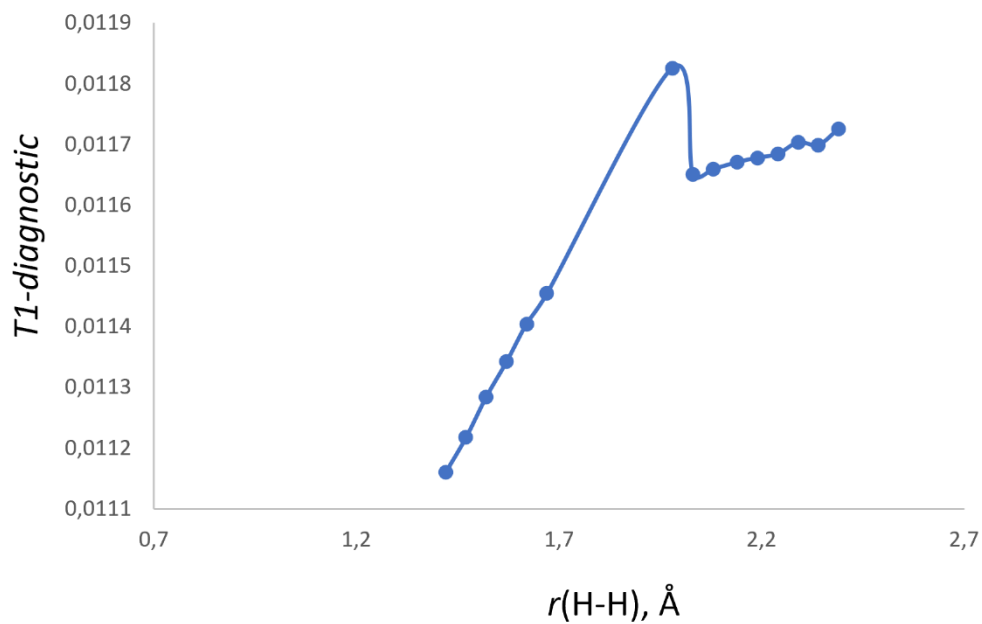

**Figure S39.** T1-diagnostic versus  $r(\text{H-H})$  in  $(\text{PCP})\text{IrH}_2$ , calculated at D3BJ-revPBE//DLPNO-CCSD(T) level of theory.

## 10. Calculation of NMR chemical shifts and coupling constants

To correctly evaluate  $^1\text{H}$  chemical shifts in transition metal hydrides, fully relativistic four-component DFT calculations of NMR properties are required. Table S14 lists a dataset we used to evaluate the performance of ReSpect program for some POCOP iridium pincer complexes. It can be seen that the most high-field  $^1\text{H}$  chemical shifts below -25-30 ppm are systematically underestimated, in agreement with what some of the ReSpect authors report in ref. 34 (in the manuscript). To improve agreement with the experimental data, here we propose an empirical correction of  $\delta = 1.091 \times \delta_{\text{raw}} - 0.726$  applied for all calculated hydride chemical shifts (Figure S40). The correction coefficients are based on a simple linear regression of the dataset in ref. 43 in the manuscript, and also improves the agreement for dataset used in Table S14. Through the correction the agreement between experimental and calculated  $^1\text{H}$  chemical shifts is brought to ca. 2 ppm. We also note that the calculated  $J_{\text{HD}}$  and  $J_{\text{PH}}$  are systematically smaller than the experimental values, but since larger datasets are not available, here we used the coupling constants without any corrections.

**Table S14.** Data set to evaluate the performance of ReSpect for iridium pincer complexes.

| Complex                                   | 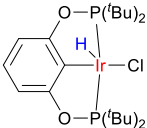 |  |  |  |
|-------------------------------------------|-----------------------------------------------------------------------------------|-----------------------------------------------------------------------------------|-------------------------------------------------------------------------------------|-------------------------------------------------------------------------------------|
| $\delta ^1\text{H}$ , ppm, calc           | -34.48                                                                            | -35.64; 0.71                                                                      | -28.67                                                                              | -7.63                                                                               |
| $\delta ^1\text{H}$ , ppm, calc corrected | -38.34                                                                            | -39.61; 0.05                                                                      | -32.00                                                                              | -9.05                                                                               |
| $\delta ^1\text{H}$ ppm, exp              | -40.66 <sup>40</sup>                                                              | -41.9; 0.3 <sup>41</sup>                                                          | -34.2 <sup>42</sup>                                                                 | -9.55 <sup>43</sup>                                                                 |
| $J_{\text{HD}}$ , Hz, calc                | -                                                                                 | 27.1                                                                              | -                                                                                   | -                                                                                   |
| $J_{\text{HD}}$ , Hz, exp                 | -                                                                                 | 33                                                                                | -                                                                                   | -                                                                                   |
| $\delta ^{31}\text{P}$ , ppm, calc        | 198.9                                                                             | -                                                                                 | 195.8                                                                               | 198.4                                                                               |
| $\delta ^{31}\text{P}$ , ppm, exp         | 175.5                                                                             | -                                                                                 | 171                                                                                 | 183.4                                                                               |
| $^2J(\text{P-H})$ , Hz, calc              | 7.8                                                                               | -                                                                                 | -                                                                                   | 11.2                                                                                |
| $^2J(\text{P-H})$ , Hz, exp               | 13.1                                                                              | -                                                                                 | -                                                                                   | 15.2                                                                                |

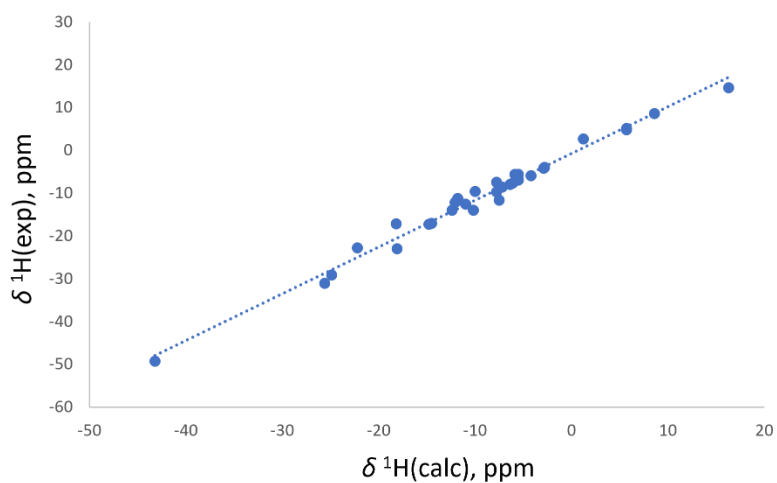

**Figure S40.** A linear regression of calculated and experimental  $^1\text{H}$  NMR chemical shifts in transition metal hydrides using the data from ref. 34 (in the manuscript).

The NMR calculations were done using PBE functional,<sup>44</sup> mdks method as implemented in ReSpect, Dyall's DZ<sup>45</sup> basis set for Ir and IGLO-II<sup>46</sup> basis set for the rest of the atoms.  $^1\text{H}$  NMR chemical shifts are referred to TMS at the same level of theory,  $^{31}\text{P}$  NMR chemical shifts are referred to (POCOP)IrHCl at the same level of theory.

## 11. Re-evaluation of complex Cp\*Ru(dppm)H<sub>2</sub><sup>+</sup>

**11.1 Re-evaluation of complex Cp\*Ru(dppm)H<sub>2</sub><sup>+</sup>.** Optimization was started from the neutron diffraction structure with CH<sub>2</sub>Cl<sub>2</sub> set as solvent. It converged to a structure with a small imaginary frequency that disappeared after the two in-plane Ph groups were slightly tilted. Using this geometry, a PES scan was performed as given on Figure S41. Subsequent optimization converged to two minima at 1.06 and 1.42 Å, respectively. A reasonable fit of  $J_{\text{HD}}-T$  dependence (Figure S42, data from ref. 47) can be constructed using limiting  $J_{\text{HD}}$  values obtained from the above-mentioned distances using the known correlation.<sup>48</sup>

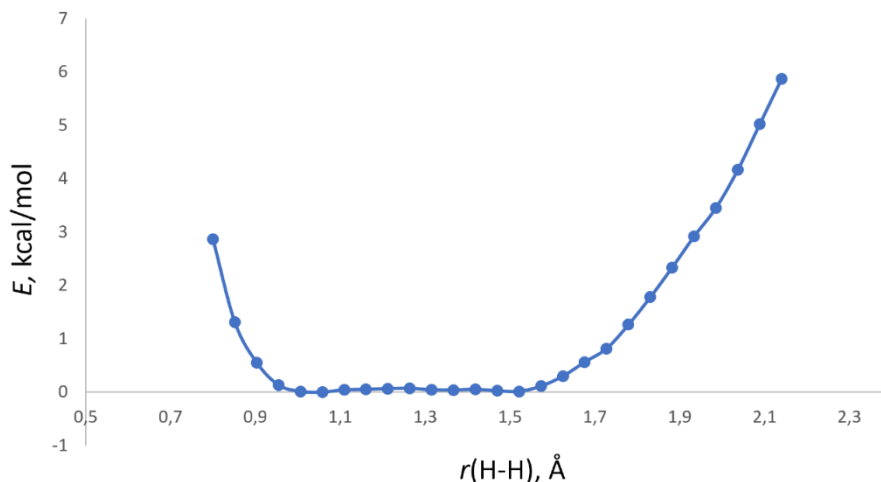

**Figure S41.** Potential energy surface scan in Cp\*Ru(dppm)H<sub>2</sub><sup>+</sup> using BS1//D3BJ-revPBE level of theory and CH<sub>2</sub>Cl<sub>2</sub> as solvent.

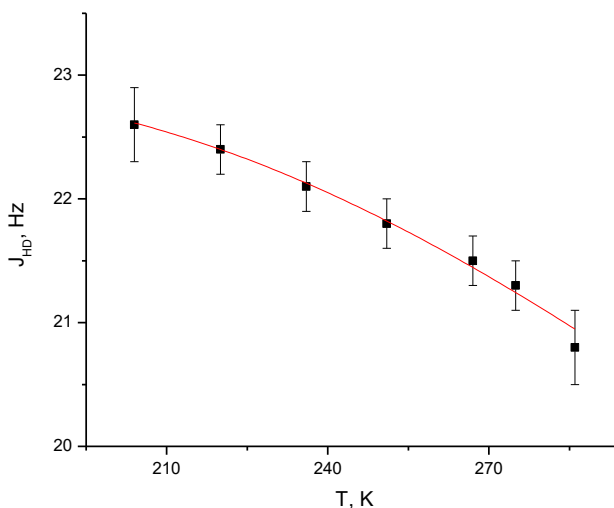

**Figure S42.** A possible fit of  $J_{\text{HD}}-T$  dependence in Cp\*Ru(dppm)H<sub>2</sub><sup>+</sup> using data from ref. 47. Coupling constants were set to 23 and 9.2 Hz. The fitted  $\Delta H$  and  $\Delta S$  are -2.6 kcal/mol and -5.4 cal $\times$ mol<sup>-1</sup> $\times$ K<sup>-1</sup>. For comparison, the  $\Delta H$  and  $\Delta S$  values for a slow compared to the NMR timescale isomerization of CpRu(dmdppe)(H<sub>2</sub>)<sup>+</sup> $\leftrightarrow$  CpRu(dmdppe)(H)<sub>2</sub><sup>+</sup> are -0.9 kcal/mol and -4.5 cal $\times$ mol<sup>-1</sup> $\times$ K<sup>-1</sup> (ref. 53 in the manuscript).

The fitted  $\Delta H$  is slightly lower than the one that could be expected from the PES scan. That is a satisfactory agreement between computational and experimental data, given the possible errors of implicit solvation model for cationic species (see ref. 60 in the manuscript).

Figure S43 compares different models for  $\text{Cp}^*\text{Ru}(\text{dppm})\text{H}_2^+$ , starting from the truncated model (a) as used in the previous studies. Unfortunately, it seems that this molecule is not very forgiving to the approximations made, and only with the highest quality models a reasonable agreement with the experimental data can be achieved.

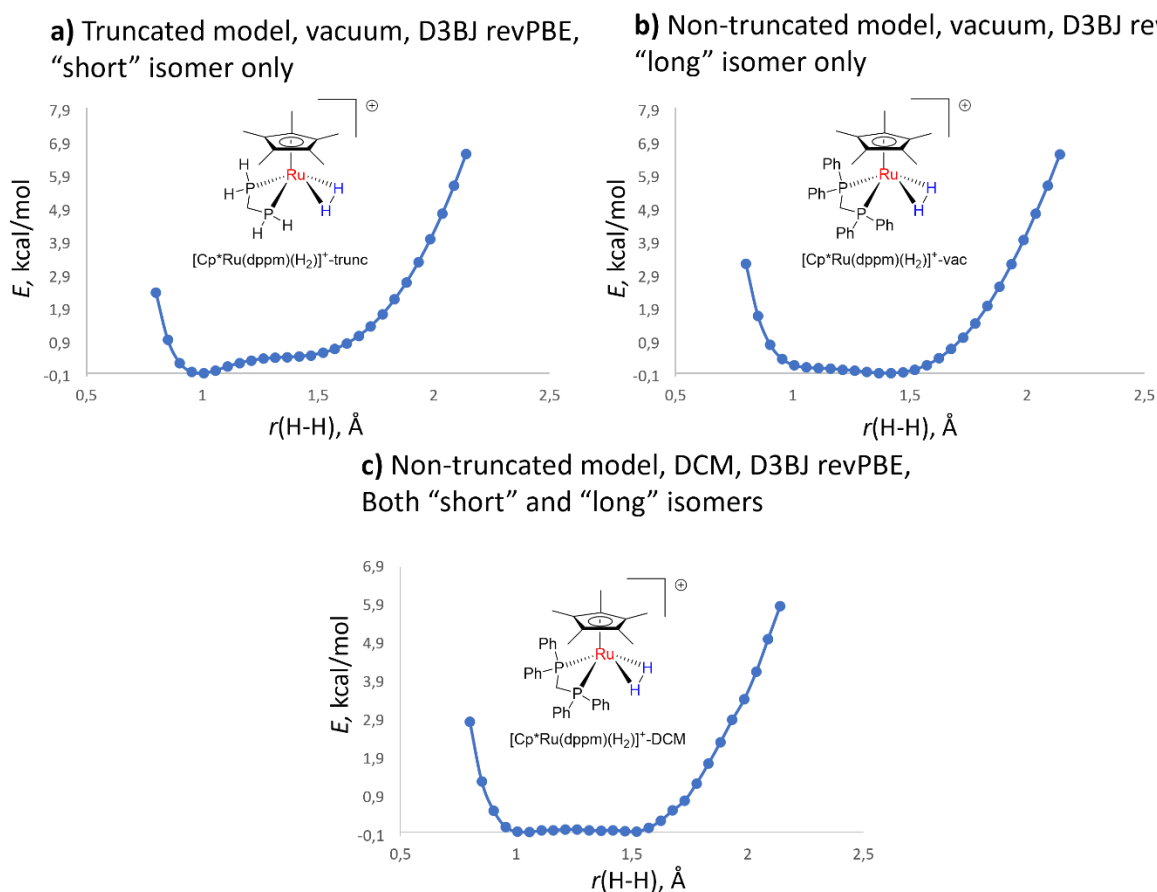

**Figure S43.** Comparison of different computational models for  $\text{Cp}^*\text{Ru}(\text{dppm})\text{H}_2^+$ .

We tested the computational model (c) for stability in manner similar to the one used for  $(\text{X-POCOP})\text{IrH}_2$ . Thus, variation of the solvent ( $\text{CH}_2\text{Cl}_2$ , MeOH, water, DMSO) was examined and produced comparatively small changes in  $r(\text{H-H})$  and relative energies. In all solvents the two minima were successfully observed, with "longer" isomer slightly favored in non-polar solvents. Also, change of CPCM for SMD solvation models was tested and did not induce any significant changes in geometry or relative energies. Two other DFT functionals in addition to the default D3BJ-revPBE were tried, as well as single-point DLPNO-CCSD(T) corrections. Thus, with D3BJ-TPSS the two isomers were found with  $r(\text{H-H})$  of 0.97 and 1.50 Å. With D3BJ-PBE0, only the "short" isomer at 0.98 Å was observed, and a shoulder instead of a "long" isomer. The latter could be detected at ca. 1.35 Å as a shallow minimum when a bigger basis set (def2-TZVPD) was used

for a single-point correction. Perhaps most importantly, the two isomers were present when DLPNO-CCSD(T) corrections were applied (Figure S44). Thus, although the relative energies may have limited precision for a cationic compound with the implicit solvation model, majority of the methods used were consistent with the existence of the two isomers of  $\text{Cp}^*\text{Ru}(\text{dppm})\text{H}_2^+$  in solution.

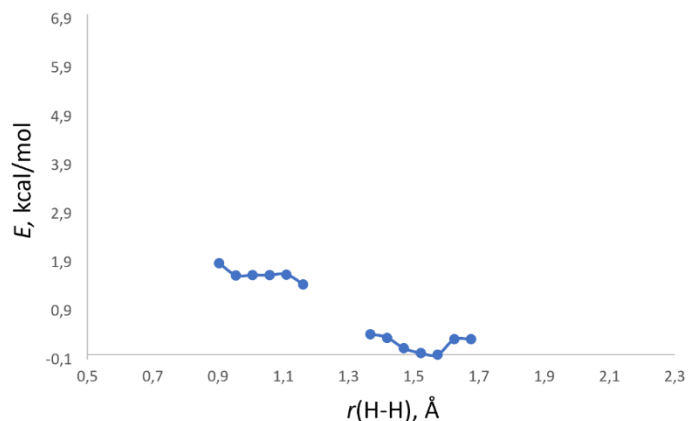

**Figure S44.** Potential energy surface scan in  $\text{Cp}^*\text{Ru}(\text{dppm})\text{H}_2^+$  with DLPNO-CCSD(T) single-point energy corrections and  $\text{CH}_2\text{Cl}_2$  as solvent.

**11.2 Explicit solvation by one  $\text{CH}_2\text{Cl}_2$  molecule.** Further on, we examined the possible effects of explicit solvation with  $\text{CH}_2\text{Cl}_2$ . Two binding modes were explored, as exemplified below for the “longer” isomer. Firstly, we have considered dihydrogen bond  $\text{Ru}-\text{H}\cdots\text{H}-\text{CHCl}_2$ . It was found that, although  $\text{CH}_2\text{Cl}_2$  can reside in the cavity formed by the two Ph rings in front of the hydride ligands, the closest  $\text{Ru}-\text{H}\cdots\text{HCHCl}_2$  distance observed in the  $\text{CH}_2\text{Cl}_2$  adduct was 2.5 Å, which is much longer than the distances observed for Ir compounds (1.84-2.04 Å for dihydrogen bond  $\text{Ir}-\text{H}\cdots\text{H}-\text{CHCl}_2$ ) and is slightly longer the respective sum of van der Waals radii (2.4 Å). Loewdin charges on Ir (-1.42 vs. -1.44) and the hydrides (0.07 and 0.08 vs. 0.06 and 0.07) were almost unaffected by the presence of  $\text{CH}_2\text{Cl}_2$ . Thus,  $\text{CH}_2\text{Cl}_2$  did not reveal bonding interaction with hydrides. At the same time,  $\text{CH}_2\text{Cl}_2$  was bound to the  $\pi$ -electron cloud of one the Ph rings through  $\text{Ph}\cdots\text{H}-\text{CHCl}_2$  interaction and to the  $>\text{P}-\text{CH}_2-\text{P}<$  fragment via  $-\text{CH}-\text{H}\cdots\text{Cl}-\text{CH}_2\text{Cl}$  hydrogen bond. The lack of dihydrogen bond for  $[\text{Cp}^*\text{Ru}(\text{dppm})(\text{H}_2)]^+$  probably reflects weaker “hydricity” of this complex, which is reasonable given the formal positive charge on it. Secondly, we examined the bonding with the Cl site of  $\text{CH}_2\text{Cl}_2$ . Given the formal positive charge on the complex, one would expect that a possible  $\text{Ru}-\text{H}\cdots\text{Cl}-\text{CH}_2\text{Cl}$  interaction is a hydrogen bond rather than halogen bond. The 3.0 Å  $\text{Ru}-\text{H}\cdots\text{Cl}-\text{CH}_2\text{Cl}$  distance was again slightly longer the sum of van der Waals radii (2.95 Å), meaning that hydrogen bond is non-existing or very weak. Bonding of  $\text{CH}_2\text{Cl}_2$  was again through  $\text{Ph}\cdots\text{H}-\text{CHCl}_2$  and  $-\text{CH}-\text{H}\cdots\text{Cl}-\text{CH}_2\text{Cl}$  interactions. The  $\text{CH}_2\text{Cl}_2$  enthalpy of binding is 5 kcal/mol, given at 2/3-extrapolation//DLPNO-CCSD(T) level. Approximately half of it comes from  $\text{Ph}\cdots\text{H}-\text{CHCl}_2$  interaction (thus, formation of  $\text{C}_6\text{H}_6\cdots\text{H}-\text{CHCl}_2$  adduct has  $\Delta\text{H}$  of -2.6 kcal/mol at the same level of theory), and the rest from  $-\text{CH}-\text{H}\cdots\text{Cl}-\text{CH}_2\text{Cl}$  interaction. The distances between the hydrides are almost unchanged (1.41 and 1.45 Å vs. 1.42 in the  $\text{Cp}^*\text{Ru}(\text{dppm})\text{H}_2^+$ ).



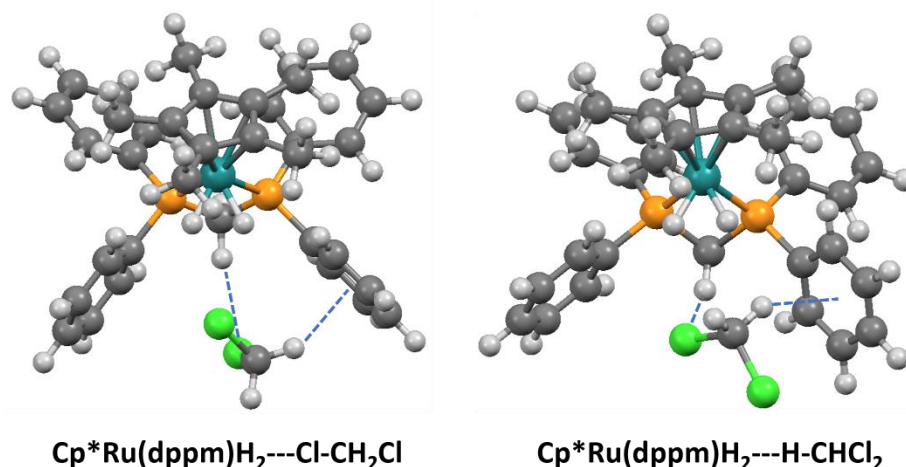

**Figure S45.** Interactions of complex  $\text{Cp}^*\text{Ru}(\text{dppm})\text{H}_2^+$  (“longer” isomer) with the explicit  $\text{CH}_2\text{Cl}_2$  molecule. The distances between hydrides and  $\text{CH}_2\text{Cl}_2$ ,  $\text{Ru-H}\cdots\text{H-CHCl}_2$  of 2.5 Å and  $\text{Ru-H}\cdots\text{Cl-CH}_2\text{Cl}$  of 3.0 Å are in the non-bonding range. The  $\text{CH}_2\text{Cl}_2$  molecule is bound to the Ru complex through interaction with the  $\pi$ -electron cloud of one of the Ph rings and hydrogen bond with  $>\text{P-CH}_2\text{-P}<$  fragment (shown with dashed lines).

Virtually the same picture was observed for the “short” isomer.  $r(\text{H-H})$  in the “short” isomer was slightly elongated upon coordination of  $\text{CH}_2\text{Cl}_2$  (1.17 vs 1.06 Å in the  $\text{Cp}^*\text{Ru}(\text{dppm})\text{H}_2^+$ ). Such elongation was deemed insignificant due to the exceptionally flat PES in the region of interest (see Figures S41 and S46), and was not reproduced with methods that give less shallow “short” minimum such as D3BJ-PBE0. PES scan with explicit  $\text{CH}_2\text{Cl}_2$  did not reveal any significant energy changes between the “short” and “long” isomers (Figure S46, compare with Figure S41).

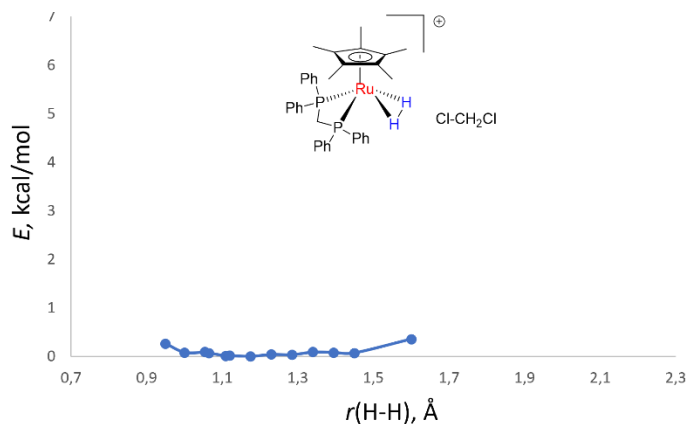

**Figure S46.** Potential energy surface scan in  $\text{Cp}^*\text{Ru}(\text{dppm})\text{H}_2^+$  at D3BJ-*rev*PBE level of theory with explicit molecule of  $\text{CH}_2\text{Cl}_2$  added. CPCM solvent  $\text{CH}_2\text{Cl}_2$ .

We thus conclude that although an explicit  $\text{CH}_2\text{Cl}_2$  can reveal attractive interactions with  $\text{Cp}^*\text{Ru}(\text{dppm})\text{H}_2^+$ , the hydride sites do not participate in bonding, and the equilibrium between the “short” and “long” isomers is not strongly perturbed by the inclusion of the explicit  $\text{CH}_2\text{Cl}_2$ .

**11.3 Possible ion pairing effects.** Finally, we explored possible effects of ion pairing. Judging from the experimental data, it is unlikely that ion pairing effects are involved. Firstly, the change of a counter-anion does not affect the NMR spectra of  $[\text{Cp}^*\text{Ru}(\text{dppm})(\text{H}_2)]^+$ . Thus, there are two sets of experimental data reported for  $[\text{Cp}^*\text{Ru}(\text{dppm})(\text{H}_2)]^+$ . Both were measured in  $\text{CD}_2\text{Cl}_2$ , one was recorded with  $\text{BF}_4^-$  counter-anion (ref. 10 in the manuscript), another was recorded with  $\text{B}(\text{ArF})_4^-$  counter-anion (ref 16b in the manuscript). The two datasets coincide (within the errors of measurement), which argues against significant effects of ion pairing on the NMR spectra. Secondly, unlike several other cases mentioned in the manuscript, the reported neutron diffraction structure of  $[\text{Cp}^*\text{Ru}(\text{dppm})(\text{H}_2)]^+$  that contains  $\text{BF}_4^-$  counter-anion, does not reveal close interactions between  $\text{RuH}_2$  and  $\text{BF}_4^-$ . Thus,  $\text{Ru-H}\cdots\text{F-BF}_3$  distance of 3.38 Å in  $[\text{Cp}^*\text{Ru}(\text{dppm})(\text{H}_2)]^+$  clearly is in the non-bonding region. For comparison, the closest  $\text{M-H}\cdots\text{F-BF}_3$  contacts are 2.74 Å in  $\text{Cp}^*\text{OsH}(\text{H}_2)\text{H}(\text{PCy}_3)^+\text{BF}_4^-$  (ref. 56 in the manuscript) and 2.42 Å in  $\text{Cp}^*\text{OsH}(\text{H}_2)\text{H}(\text{PPh}_3)^+\text{BF}_4^-$ <sup>49</sup>. Instead, as one would expect after studying interactions with  $\text{CH}_2\text{Cl}_2$ , in the solid state  $\text{BF}_4^-$  reveals close interaction with  $>\text{P-CH}_2\text{-P}<$  fragment ( $\text{F}\cdots\text{H-CH-}$  2.28 Å). The binding of  $\text{BF}_4^-$  to  $>\text{P-CH}_2\text{-P}<$  instead of hydrides explains the lack of counter-anion effect on  $[\text{Cp}^*\text{Ru}(\text{dppm})(\text{H}_2)]^+$ . A good example of an opposite case, that is how replacement of  $\text{PF}_6^-$  counter-anion that interacts with hydrides, with a less nucleophilic  $\text{BPh}_4^-$  counter-anion, could affect the distance between hydrides, is given in ref. 59 (in the manuscript).

Computational study supported the conclusions made above. Thus, coordination of  $\text{BF}_4^-$  to  $>\text{P-CH}_2\text{-P}<$  site (Figure S47, structures d-f) was found slightly more favorable compared to “bifurcated” coordination to both  $\text{RuH}_2$  and  $>\text{P-CH}_2\text{-P}<$  fragments (Figure S47, structures a-c). Exclusive coordination to  $\text{RuH}_2$  was not observed. When  $\text{RuH}_2$  fragment was involved in bonding, only “short” isomers were observed that revealed comparatively minor shortening of  $r(\text{H-H})$  compared to the parent  $[\text{Cp}^*\text{Ru}(\text{dppm})(\text{H}_2)]^+$ . For isomers that reveal coordination to  $>\text{P-CH}_2\text{-P}<$ , a minor elongation of  $r(\text{H-H})$  was observed, and both “short” and “long” isomers with comparable energies were present. Given that the lowest energy isomer does not involve interaction with  $\text{RuH}_2$  unit, and that the  $r(\text{H-H})$  and relative energy changes invoked by  $\text{BF}_4^-$  coordination are minor, it is likely that ion pairing has little, if any, effect on the NMR spectra of  $[\text{Cp}^*\text{Ru}(\text{dppm})(\text{H}_2)]^+$ . When a more complex model involving partial explicit solvation with  $\text{CH}_2\text{Cl}_2$  was attempted, the isomers with coordination of  $\text{BF}_4^-$  to  $>\text{P-CH}_2\text{-P}<$  site were even more favored, with the difference reaching 4 kcal/mol (Figure S48). Thus, when three molecules of  $\text{CH}_2\text{Cl}_2$  were added to structures (a), (b) and (d), new structures (a) $\times 3\text{CH}_2\text{Cl}_2$ , (c) $\times 3\text{CH}_2\text{Cl}_2$ , and (d) $\times 3\text{CH}_2\text{Cl}_2$  were obtained, as depicted on Figure S48. These structures feature weaker  $\text{RuH}_2\cdots\text{BF}_4^-$  interaction, reflected for example by a longer  $r(\text{H}\cdots\text{F})$  of 2.34 Å in (a) $\times 3\text{CH}_2\text{Cl}_2$  compared to 2.21 in (a)), and spontaneous isomerization of (b) $\times 3\text{CH}_2\text{Cl}_2$  to “longer” isomer of (c) $\times 3\text{CH}_2\text{Cl}_2$ . PES scan again exhibited almost the same energies for “short” and “long” isomers of (d) $\times 3\text{CH}_2\text{Cl}_2$  and (c) $\times 3\text{CH}_2\text{Cl}_2$  and we have not further pursued optimizing more structures since it was very time consuming due to wavefunction oscillations. To sum up, ion pairing with and without explicit solvent involves mainly interaction with  $>\text{P-CH}_2\text{-P}<$  fragment and has little effect on equilibria between the “short” and “long” isomers – fully in line with the experimental datasets.

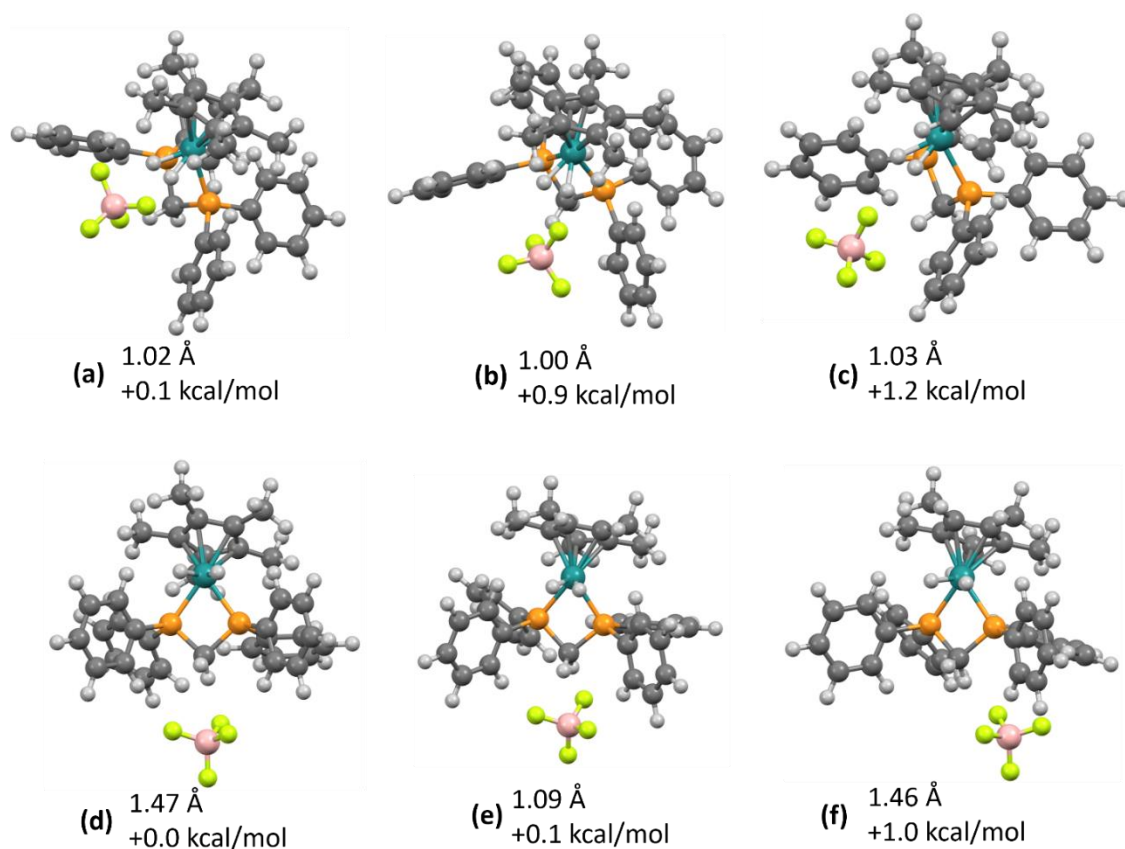

**Figure S47.** Isomers of  $\text{Cp}^*\text{Ru}(\text{dppm})\text{H}_2^+ \text{BF}_4^-$  ion pair at D3BJ-revPBE level of theory. CPCM solvent  $\text{CH}_2\text{Cl}_2$ . Structures a-c feature interaction of  $\text{BF}_4^-$  with both  $\text{RuH}_2$  and  $>\text{P}-\text{CH}_2-\text{P}<$  fragments. Structures d-f feature interaction of  $\text{BF}_4^-$  with  $>\text{P}-\text{CH}_2-\text{P}<$  fragment only.  $r(\text{H}-\text{H})$  and relative energies in kcal/mol are provided.

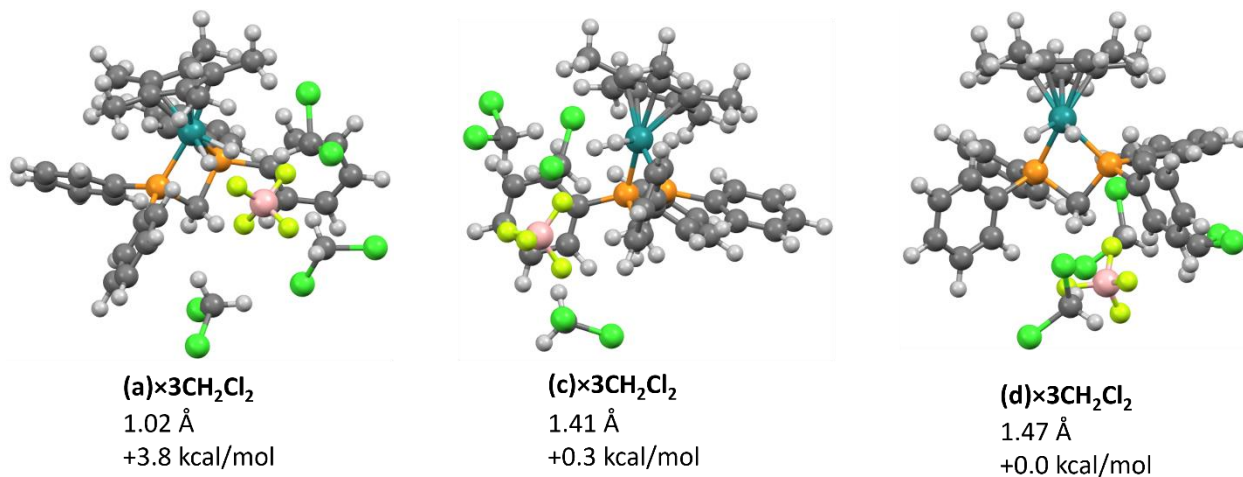

**Figure S48.** Selected isomers of  $\text{Cp}^*\text{Ru}(\text{dppm})\text{H}_2^+ \text{BF}_4^-$  ion pair with partial explicit solvation with three molecules of  $\text{CH}_2\text{Cl}_2$  at D3BJ-revPBE level of theory. CPCM solvent  $\text{CH}_2\text{Cl}_2$ .

**Table S15.** The effect of solid-state interactions on some transition metal hydrides. Data is taken from refs 55-57 and 59 (in the manuscript).

Part 1

|                                                                  | $\text{IrH}(\text{H}_2)\text{Cl}_2(\text{P}^i\text{Pr}_3)_2$ | $[\text{Os}(\text{H}_2)\text{Cl}(\text{dppe})]^+\text{PF}_6^-$ | $\text{Cp}^*\text{OsH}(\text{H}_2)\text{H}(\text{PCy}_3)^+\text{BF}_4^-$ |
|------------------------------------------------------------------|--------------------------------------------------------------|----------------------------------------------------------------|--------------------------------------------------------------------------|
| Interaction                                                      | Ir-H---Cl-Ir                                                 | Os-H---PF <sub>6</sub> <sup>-</sup>                            | Os-H---PF <sub>6</sub> <sup>-</sup>                                      |
| $r(\text{H-H})$ in solid state, neutron diffraction, Å           | 1.11                                                         | 1.15                                                           | 1.31                                                                     |
| $r(\text{H-H})$ in solution from $J_{\text{HD}}$ , Å             | 1.19-1.31 assuming H-(H <sub>2</sub> ) coupling as ±1Hz      | ≈1.25                                                          | 0.99-1.21                                                                |
| $r(\text{H-H})$ in solution from $T_1(\text{min})$ (slow regime) | ≈1.5                                                         | 1.35                                                           | 1.12                                                                     |
| $r(\text{H-H})$ in solution from $T_1(\text{min})$ (fast regime) | -                                                            | 1.08                                                           | -                                                                        |
| $r(\text{H-H})$ from DFT calculations                            | 1.1-bound; 1.5 non-bound                                     | 1.11 bound; 1.35 non-bound                                     | 1.51 bound; 1.10/1.68 non-bound                                          |

Part 2

|                                                      | $[(\text{PP}_3)\text{Co}(\text{H})_2]^+\text{PF}_6^-$ | $[(\text{PP}_3)\text{Co}(\text{H}_2)]^+\text{BPh}_4^-$                              |  |
|------------------------------------------------------|-------------------------------------------------------|-------------------------------------------------------------------------------------|--|
| Interaction                                          | Co-H---PF <sub>6</sub> <sup>-</sup>                   | -                                                                                   |  |
| $r(\text{H-H})$ in solid state, X-ray diffraction, Å | ≈1.94                                                 | coordination in the form of molecular hydrogen was deduced from the ligand geometry |  |

## 12. Probing the “continuum” of H-H bond activation by transition metals

Transition metal hydrides with temperature-dependent  $J_{\text{HD}}$  are so far exclusively found in the “non-classical”  $r(\text{H-H})$  region that spans approximately from 1.0 to 1.6 Å. We wondered if it is just a coincidence or there is something special about that region that differs it from regions of classical dihydrides and dihydrogen complexes. In an attempt to visualize the continuum of H-H bond activation, we computationally varied the electronic properties of the model compounds ( $^{\text{Me}4}\text{X-PCP})\text{IrH}_2$  in an incremental way by substituting the ligand H atoms with F, thus plotting  $r(\text{H-H})$  vs. “electron-richness” of the ligands (Figure 11 in the manuscript). Fluorine atoms were placed into methyl groups one per group until all four groups were mono-substituted; then the procedure was repeated. Once all methyl groups were fully filled with fluorine atoms, pincer -CH<sub>2</sub>- arms were populated. D3BJ-*rev*PBE//BS1 level of theory with CPCM solvent toluene was used, as described in “Computational details”. When “classical” regions with linear dependence of  $r(\text{H-H})$  on the number of F atoms were long enough to allow fit, a slope of -0.003...-0.004 Å/F-atom is observed (see Figure 11 in the manuscript). In the S-shaped “non-classical” regions, slope could be two orders of magnitude higher, i.e., 0.3-0.4 Å/F-atom. Hence, in the “non-classical” regions  $r(\text{H-H})$  was found very sensitive to electronic properties of the ligand, and therefore it would be very sensitive to the external stimuli as well.

Another example studied was  $[\text{Os}(\text{H}_2)(\text{en})_2\text{X}]^+$ , where  $r(\text{H-H})$  as a function of X was studied. Clearly, one has to account for both  $\sigma$  and  $\pi$  effects of X groups. Here we used Swain and Lupton parameters F and R taken from ref. 50. We expect that the effects behind these parameters will not be transmitted in the same way for organometallic compounds as it was for organic compounds. In an attempt to build a 2D plot, we defined a new parameter  $\chi$  which consisted of a weighted sum of F and R, obtained by a multiple linear regression of  $r(\text{H-H})$ , F, and R:  $\chi = -0.023\text{F} - 0.053\text{R}$ . The result is depicted on Figure S49. Again, there were two “classical” regions with linear dependence, and a “non-classical” region in between. Classical dihydrides were mainly represented by X groups with good  $\pi$ -donor ability, while classical dihydrogen complexes were mainly represented by X groups with good  $\pi$ -acceptor ability. Many “non-classical” complexes were represented by X groups that are good  $\sigma$ -donors with moderate/weak  $\pi$ -donor/acceptor properties. Within the structurally related series of compounds the trends were the same as for  $(^{\text{Me}4}\text{X-PCP})\text{IrH}_2$ . For example,  $[\text{Os}(\text{H}_2)(\text{en})_2\text{CH}_3]^+$  revealed  $r(\text{H-H})$  of 1.328 Å, while changing -CH<sub>3</sub> for -CH<sub>2</sub>F to give  $[\text{Os}(\text{H}_2)(\text{en})_2\text{CH}_2\text{F}]^+$  resulted in  $r(\text{H-H})$  change to 0.973 Å. The list of X groups studied is give in Table S16.

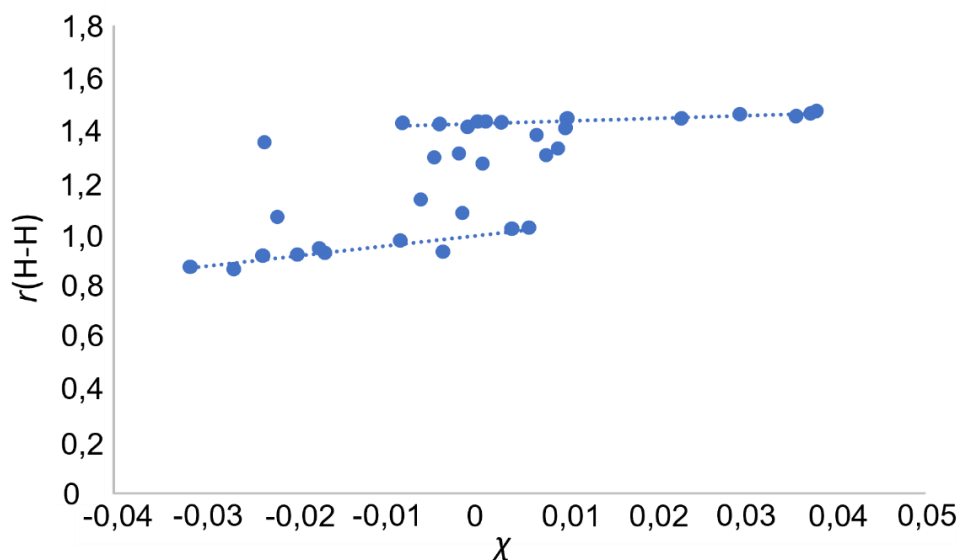

**Figure S49.** Dependence of  $r(\text{H-H})$  on X group in  $[\text{Os}(\text{H}_2)(\text{en})_2\text{X}]^+$ , plotted as  $\chi$  (-0.023F-0.053R) versus  $r(\text{H-H})$ .

**Table S16.** List of X groups studied for  $[\text{Os}(\text{H}_2)(\text{en})_2\text{X}]^+$ . D3BJ-revPBE//BS1 level of theory with CPCM solvent methanol was used. The groups were randomly chosen from ref 50. Groups that revealed high degree of steric bulk or additional interactions were excluded from Figure S49. In particular, for neutron-diffraction relevant  $-\text{OCOCH}_3$ , only the isomer that does not involve O---HN- contacts, was included.

| Entry | group                            | F    | R     | $r(\text{H-H})$ |
|-------|----------------------------------|------|-------|-----------------|
| 1     | -POCl <sub>2</sub>               | 0,7  | 0,2   | 0,862           |
| 2     | -IF <sub>4</sub>                 | 0,98 | 0,17  | 0,871           |
| 3     | -SF <sub>3</sub>                 | 0,63 | 0,17  | 0,914           |
| 4     | -CN                              | 0,51 | 0,15  | 0,918           |
| 5     | -COMe                            | 0,33 | 0,17  | 0,926           |
| 6     | SiH <sub>3</sub>                 | 0,06 | 0,04  | 0,929           |
| 7     | CF <sub>3</sub>                  | 0,38 | 0,16  | 0,942           |
| 8     | -CF <sub>2</sub> H               | 0,29 | 0,03  | 0,973           |
| 9     | -Ph                              | 0,12 | -0,13 | 1,019           |
| 10    | -CH-CH <sub>2</sub>              | 0,13 | -0,17 | 1,023           |
| 11    | -Ph-OMe                          |      |       | 1,041           |
| 12    | -NO <sub>2</sub>                 | 0,65 | 0,13  | 1,064           |
| 13    | -CH <sub>2</sub> F               | 0,15 | -0,04 | 1,078           |
| 14    | PH <sub>2</sub>                  | 0,05 | 0,09  | 1,131           |
| 15    | -CH <sub>2</sub> OH              | 0,03 | -0,03 | 1,268           |
| 16    | -PHMe                            |      |       | 1,269           |
| 17    | -CH <sub>2</sub> CN              | 0,17 | 0,01  | 1,293           |
| 18    | -CH <sub>2</sub> CH <sub>3</sub> | 0    | -0,15 | 1,301           |

|    |                                   |      |       |       |
|----|-----------------------------------|------|-------|-------|
| 19 | -PMe <sub>2</sub>                 | 0,05 | 0,01  | 1,308 |
| 20 | -CH <sub>3</sub>                  | 0,01 | -0,18 | 1,328 |
| 21 | -C(CN) <sub>3</sub>               | 0,92 | 0,04  | 1,35  |
| 22 | -SMe                              | 0,23 | -0,23 | 1,379 |
| 23 | -N <sub>3</sub>                   | 0,48 | -0,4  | 1,407 |
| 24 | -H                                | 0,03 | 0     | 1,412 |
| 25 | -OCOCH <sub>3</sub>               | 0,42 | -0,11 | 1,422 |
| 26 | -OCN                              | 0,69 | -0,15 | 1,426 |
| 27 | -SO <sub>4</sub> H                |      |       | 1,427 |
| 28 | -I                                | 0,42 | -0,24 | 1,428 |
| 29 | -Cl                               | 0,42 | -0,19 | 1,432 |
| 30 | -Br                               | 0,45 | -0,22 | 1,432 |
| 31 | NH-OH                             | 0,11 | -0,45 | 1,441 |
| 32 | -F                                | 0,45 | -0,39 | 1,443 |
| 33 | -OMe                              | 0,29 | -0,56 | 1,444 |
| 34 | -NH-NH <sub>2</sub>               | 0,22 | -0,77 | 1,453 |
| 35 | -OH                               | 0,33 | -0,7  | 1,46  |
| 36 | NH <sub>2</sub>                   | 0,08 | -0,74 | 1,464 |
| 37 | -NHMe                             | 0,03 | -0,73 | 1,472 |
| 38 | -B(NH <sub>2</sub> ) <sub>2</sub> |      |       | 1,598 |

### 13. Examination of transition metal hydrides with XRD-based $r(\text{H-H})$ 1.15-1.25 Å

Structures were found in CSD database. Criteria:  $r(\text{H-H})$  1.15-1.25 Å, hydrides are not bridging, few W, Mo and Re based structures were excluded to reduce the number of calculations. In most of the cases, except for entry 3, there was a strong mismatch between the calculated and experimental data. We suppose this mainly reflects poor quality of hydride position determination by XRD, including the possibility of unresolved weighted-average positions. Also, it might indicate that structures with  $r(\text{H-H})$  around 1.2 Å are comparatively rare, and, as it was for three neutron diffraction structures discussed in the text, some of them may require additional interactions in solid state for stabilization.

**Table S17.** Transition metal hydrides with XRD-based  $r(\text{H-H})$  1.15-1.25 Å, examined by DFT calculations. DFT-based distances from original publications are also provided where available.

| Entry | Code   | Complex                                                                             | M  | $r(\text{H-H})$ -exp, Å | $r(\text{H-H})$ -calc, Å                                                | Reference                                             |
|-------|--------|-------------------------------------------------------------------------------------|----|-------------------------|-------------------------------------------------------------------------|-------------------------------------------------------|
| 1     | HECWUJ | 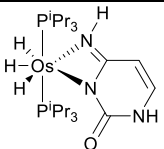 | Os | 1.168                   | This work:<br>1.640; 1.610<br>Solvent:<br>C <sub>6</sub> D <sub>6</sub> | <i>Inorg. Chem.</i><br>2012, <b>51</b> ,<br>9522–9528 |

|   |        |  |    |                                   |                                                                       |                                                                                                                      |
|---|--------|--|----|-----------------------------------|-----------------------------------------------------------------------|----------------------------------------------------------------------------------------------------------------------|
| 2 | VAPPOS |  | Os | 1.174                             | Original work: truncated model 1.712                                  | <i>Organometallics</i> 2003, <b>22</b> , 3753-3765                                                                   |
| 3 | VAWLOX |  | Os | 1.183                             | Original work: 1.243 (no solvation); This work 1.135, Solvent: CH2Cl2 | <i>Chem.-Eur.J.</i> 2017, <b>23</b> , 1526                                                                           |
| 4 | ZUTTEQ |  | Ir | 1.214                             | Original work: 1.90 (dihydride isomer) or 0.86 (dihydrogen isomer)    | <i>Chem. Sci.</i> , 2020, <b>11</b> , 10705                                                                          |
| 5 | DONXAI |  | Ir | 1.214 molecule 1; 1.37 molecule 2 | This work: 1.607 Solvent: C6D6                                        | <i>Dalton Trans.</i> , 2019, <b>48</b> , 12812                                                                       |
| 6 | HINNUN |  | Os | 1.223                             | Not attempted due to experimental correction to 1.46 A                | <i>Organometallics</i> 1998, <b>17</b> , 4065-4076<br>Correction: <i>Organometallics</i> 2006, <b>25</b> , 3481-3485 |
| 7 | XIQLOY |  | Os | 1.228                             | This work: 1.650; 1.737 Solvent: C6D6                                 | <i>Organometallics</i> 2001, <b>20</b> , 2635-2638                                                                   |
| 8 | TAJWIL |  | Os | 1.237                             | Original work: 1.671 (truncated)                                      | <i>Organometallics</i> 2003, <b>22</b> , 2087-2096                                                                   |



|    |        |                                                                                                            |    |       |                                                                   |                                                           |
|----|--------|------------------------------------------------------------------------------------------------------------|----|-------|-------------------------------------------------------------------|-----------------------------------------------------------|
| 9  | LIJKOG | (POP)OsH <sub>4</sub><br>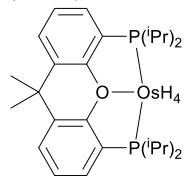 | Os | 1.244 | Original work:<br>1.683                                           | <i>Inorg. Chem.</i><br>2013, <b>52</b> ,<br>6199–6213     |
| 10 | GIXMEG |                           | Os | 1.246 | This work:<br>1.57<br>Solvent:<br>CH <sub>2</sub> Cl <sub>2</sub> | <i>Organometallics</i><br>2008, <b>27</b> , 445–<br>450   |
| 11 | XEKMUV |                           | Rh | 1.250 | This work:<br>1.928<br>Solvent:<br>THF                            | <i>Organometallics</i><br>2000, <b>19</b> , 1194-<br>1197 |

### 13. References

- 1) I. Gottker-Schnetmann, P. S. White and M. Brookhart, *Organometallics* 2004, **23**, 1766-1776.
- 2) (a) M. Gupta, C. Hagen, R. J. Flesher, W. C. Kaska and C. M. Jensen, *Chem. Commun.* 1996, 2083-2084. (b) M. Gupta, C. Hagen, W. C. Kaska, R. E. Cramer and C. M. Jensen. *J. Am. Chem. Soc.* 1997, **119**, 840-841.
- 3) N. T. Mucha and R. Waterman. *Organometallics* 2015, **34**, 3865-3872.
- 4) I. Gottker-Schnetmann, D. M. Heinekey and M. Brookhart, *J. Am. Chem. Soc.* 2006, **128**, 17114-17119.
- 5) CrysAlis CCD; Oxford Diffraction Ltd.: Abingdon, Oxfordshire, UK (2005).
- 6) CrysAlis RED; Oxford Diffraction Ltd.: Abingdon, Oxfordshire, UK (2005).
- 7) V. Petříček, M. Dušek, L. Palatinus. Crystallographic Computing System JANA2006: General features. *Z. Kristallogr. Cryst. Mater.* 2014, **229**, 345-352.

- 8) C. F. Macrae, P. R. Edgington, P. McCabe, E. Pidcock, G. P. Shields, R. Taylor, M. Towler and J. van de Streek. Mercury: visualization and analysis of crystal structures. *J. Appl. Cryst.*, 2006, **39**, 453-457.
- 9) D. A. Keen, M. J. Gutmann and C. C. Wilson, *J. App. Cryst.* 2006, **39**, 714–722.
- 10) M. J. Gutmann, SXD2001. ISIS Neutron and Muon Facility, Rutherford Appleton Laboratory, Oxfordshire, England, 2005.
- 11) G. M. Sheldrick, *Acta Cryst.*, 2008, **A64**, 112-122.
- 12) H. B. Bürgi and S. C. Capelli, *Acta Cryst.* 2000, **A56**, 403-412.
- 13) H. B. Bürgi, M. Förtsch, S. C. Capelli and J. Hauser. “NKA: Program for Normal Coordinate Analysis from Anisotropic Displacement Parameters at multiple temperatures”. Version 5.1.17, University of Bern, Switzerland, 2004.
- 14) H. B. Bürgi, S. C. Capelli, A. E. Goeta, J. A. K. Howard, M. A. Spackman and D. S. Yufit, *Chem. Eur. J.*, 2002, **8**, 3512-3521.
- 15) J. P. Coliman, P. S. Wagenknecht, J. E. Hutchison, N. S. Lewis, M. A. Lopez, R. Guilard, M. L’Her, A. A. Bothner-By and P. K. Mishra, *J. Am. Chem. Soc.*, 1992, **114**, 5654-5664.
- 16) S. Sabo-Etienne, V. Rodriguez, B. Donnadiou, B. Chaudret, H. A. el Makarim, J.-C. Barthelat, S. Ulrich, H.-H. Limbach and C. Moise, *New J. Chem.*, 2001, **25**, 55-62.
- 17) X. S. Bogle and D. A. Singleton, *J. Am. Chem. Soc.* 2011, **133**, 17172–17175.
- 18) K. E. Janak and G. Parkin, *J. Am. Chem. Soc.* 2003, **125**, 13219-13224.
- 19) In eMagRes (eds R.K. Harris and R.L. Wasylishen), John Wiley & Sons, Ltd, 2007.
- 20) D. Bao, B. Millare, W. Xia, B. G. Steyer, A. A. Gerasimenko, A. Ferreira, A. Contreras and V. I. Vullev, *J. Phys. Chem. A* 2009, **113**, 1259–1267.
- 21) 1) (a) F. Neese, “The ORCA program system” *Wiley Interdiscip. Rev. Comput. Mol. Sci.*, 2012, **2**, 73–78. (b) F. Neese, “Software update: the ORCA program system, version 4.0” *Wiley Interdiscip. Rev. Comput. Mol. Sci.*, 2017, **8**, e1327.
- 22) Y. Zhang and W. Yang, *Phys. Rev. Lett.* 1996, **77**, 3865.
- 23) Grimme, S. Ehrlich and L. Goerigk, *J. Comput. Chem.*, 2011, **32**, 1456-1465.
- 24) S. Grimme, J. Antony, S. Ehrlich and H. Krieg. *J. Chem. Phys.*, 2010, **132**, 154104.
- 25) F. Weigend and R. Ahlrichs, *Phys. Chem. Chem. Phys.* 2005, **7**, 3297.
- 26) J. Zheng, X. Xu and D. G. Truhlar, *Theor. Chem. Acc.* 2011, **128**, 295–305.
- 27) G. L. Stoychev, A. A. Auer and F. Neese, *J. Chem. Theory Comput.* 2017, **13**, 554–562.
- 28) M. Cossi and V. Barone, *J. Phys. Chem. A* 1998, **102**, 1995–2001.

- 29) (a) C. Riplinger and F. Neese, *J. Chem. Phys.* 2013, **138**, 034106. (b) C. Riplinger, B. Sandhoefer, A. Hansen and F. Neese, *J. Chem. Phys.* 2013, **139**, 134101.
- 30) D. A. Pantazis, X.-Y. Chen, C. R. Landis and F. Neese, *J. Chem. Theory Comput.* 2008, **4**, 908–919.
- 31) C. van Wüllen. *J. Chem. Phys.* 1998, **109**, 392–399.
- 32) D. Rappoport and F. Furche, *J. Chem. Phys.* 2010, **133**, 134105.
- 33) C. Adamo and V. Barone, *J. Chem. Phys.* 1999, **110**, 6158-5170.
- 34) Y. Zhao and D. G. Truhlar, *J. Chem. Phys.* 2006, **125**, 194101.
- 35) J. M. Tao, J. P. Perdew, V. N. Staroverov and G. E. Scuseria, *Phys. Rev. Lett.* 2003, **91**, 146401.
- 36) Y. Zhao and D. G. Truhlar, *Theor. Chem. Acc.* 2008, **120**, 215.
- 37) (a) A. Najibi and L. Goerigk, *J. Chem. Theory Comput.* 2018, **14**, 5725–5738. (b) J. D. Chai and M. Head-Gordon, *J. Chem. Phys.* 2008, **128**, 084106.
- 38) S. Grimme, *J. Chem. Phys.* 2003, **118**, 9095-9102.
- 39) W. Jiang, N. J. DeYonker and A. K. Wilson, *J. Chem. Theory Comput.* 2012, **8**, 460–468.
- 40) I. Göttker-Schnetmann, P. S. White and M. Brookhart, *J. Am. Chem. Soc.* 2004, **126**, 1804-1811.
- 41) M. Findlater, K. M. Schultz, W. H. Bernskoetter, A. Cartwright-Sykes, D. M. Heinekey and M. Brookhart, *Inorg. Chem.* 2012, **51**, 4672-4678.
- 42) A. V. Polukeev, O. Y. Abdelaziz and O. F. Wendt, *Organometallics* 2022, **41**, 859–873.
- 43) A. V. Polukeev, P. V. Petrovskii, A. S. Peregudov, M. G. Ezernitskaya and A. A. Koridze. *Organometallics* 2013, **32**, 1000–1015.
- 44) J. P. Perdew, K. Burke and M. Ernzerhof, *Phys. Rev. Lett.* 1996, **77**, 3865– 3868.
- 45) (a) K. G. Dyall, *Theor. Chem. Acc.* 2004, **112**, 403–409. (b) K. G. Dyall and A. S. P. Gomes, *Theor. Chem. Acc.* 2010, **125**, 97.
- 46) W. Kutzelnigg, U. Fleischer and M. Schindler, *In Deuterium and Shift Calculation. NMR Basic Principles and Progress*; U. Fleischer, W. Kutzelnigg, H. H. Limbach, G. J. Martin, M. L. Martin and M. Schindler, Eds.; Springer, 1991; Vol. **23**, pp 165–262; ISBN 978- 3-642-75932-1.
- 47) J. K. Law, H. Mellows and D. M. Heinekey. *J. Am. Chem. Soc.* 2002, **124**, 1024-1030.
- 48) S. Gründemann, H.-H. Limbach, G. Buntkowsky, S. Sabo-Etienne and B. Chaudret, *J. Phys. Chem. A* 1999, **103**, 4752–4754. (b) R. Gelabert, M. Moreno, J. M. Lluch, A. Lledos, V. Pons and D. M. Heinekey, *J. Am. Chem. Soc.* 2004, **126**, 8813-8822.

49) C. E. Webster, C. L. Gross, D. M. Young, G. S. Girolami, A. J. Schultz, M. B. Hall and J. Eckert, *J. Am. Chem. Soc.* 2005, **127**, 15091-15101.

50) C. Hansch, A. Leo and R. W. Taft, *Chem. Rev.* 1991, **91**, 165-195.

## 14. List of Cartesian coordinates

Electronic energies are given at BS1//D3BJ-revPBE level

72

(p-MeO-POCOP)IrH<sub>2</sub> S tol, E = -1914.031455

|    |              |              |              |
|----|--------------|--------------|--------------|
| C  | -0.356080000 | 1.195971000  | -3.609131000 |
| C  | -0.233313000 | 1.185359000  | -2.211742000 |
| C  | -0.171273000 | -0.025093000 | -1.466040000 |
| C  | -0.236631000 | -1.241233000 | -2.191370000 |
| C  | -0.357824000 | -1.281063000 | -3.595698000 |
| C  | -0.417090000 | -0.047871000 | -4.291923000 |
| H  | -0.404360000 | 2.132228000  | -4.180059000 |
| H  | -0.403462000 | -2.247718000 | -4.109334000 |
| O  | -0.180692000 | -2.435166000 | -1.505760000 |
| O  | -0.168987000 | 2.385675000  | -1.538023000 |
| P  | -0.027171000 | -2.264670000 | 0.224698000  |
| P  | -0.019564000 | 2.237341000  | 0.192665000  |
| Ir | 0.007907000  | -0.011569000 | 0.595928000  |
| H  | 0.952821000  | 0.013177000  | 1.895531000  |
| H  | -0.675962000 | -0.013886000 | 2.052829000  |
| C  | 1.601099000  | -3.203382000 | 0.466730000  |
| C  | -1.578531000 | -3.229699000 | 0.731010000  |
| C  | 1.599023000  | 3.199496000  | 0.411358000  |
| C  | -1.579686000 | 3.184702000  | 0.701945000  |
| C  | 1.981865000  | -3.142404000 | 1.961534000  |
| H  | 3.000807000  | -3.563740000 | 2.090719000  |
| H  | 1.987236000  | -2.097935000 | 2.328536000  |
| H  | 1.292618000  | -3.731416000 | 2.594880000  |
| C  | -1.520292000 | -3.490172000 | 2.249757000  |
| H  | -1.279556000 | -2.565369000 | 2.811219000  |
| H  | -2.510765000 | -3.853423000 | 2.595186000  |
| H  | -0.772592000 | -4.264989000 | 2.506428000  |
| C  | 2.635189000  | -2.395279000 | -0.355473000 |
| H  | 2.411640000  | -2.435258000 | -1.438441000 |
| H  | 2.646773000  | -1.331799000 | -0.044230000 |
| H  | 3.643865000  | -2.827798000 | -0.189798000 |
| C  | 1.562119000  | -4.658510000 | -0.033069000 |
| H  | 2.594200000  | -5.068416000 | -0.030320000 |
| H  | 0.949057000  | -5.303984000 | 0.623223000  |
| H  | 1.171106000  | -4.723913000 | -1.066206000 |
| C  | -1.783164000 | -4.541199000 | -0.051933000 |
| H  | -1.047286000 | -5.316770000 | 0.223046000  |
| H  | -2.792518000 | -4.940846000 | 0.181711000  |
| H  | -1.724801000 | -4.369250000 | -1.142920000 |
| C  | -2.745061000 | -2.262525000 | 0.409666000  |
| H  | -2.639333000 | -1.309144000 | 0.962856000  |
| H  | -2.785241000 | -2.025469000 | -0.671298000 |
| H  | -3.703394000 | -2.744204000 | 0.696560000  |
| C  | 1.815622000  | 3.462771000  | 1.915170000  |

|   |              |              |              |
|---|--------------|--------------|--------------|
| H | 1.678435000  | 2.539406000  | 2.512655000  |
| H | 2.852616000  | 3.824910000  | 2.075811000  |
| H | 1.127693000  | 4.239311000  | 2.300915000  |
| C | -1.687668000 | 3.158902000  | 2.241444000  |
| H | -2.669621000 | 3.581759000  | 2.540459000  |
| H | -1.621778000 | 2.123468000  | 2.627920000  |
| H | -0.899980000 | 3.764259000  | 2.727536000  |
| C | 2.687054000  | 2.228947000  | -0.112079000 |
| H | 2.680124000  | 1.276679000  | 0.452963000  |
| H | 2.532758000  | 1.990534000  | -1.182381000 |
| H | 3.682172000  | 2.708868000  | -0.002127000 |
| C | 1.661570000  | 4.508566000  | -0.399185000 |
| H | 0.991321000  | 5.287409000  | 0.004350000  |
| H | 2.698036000  | 4.904646000  | -0.355477000 |
| H | 1.403660000  | 4.334898000  | -1.460591000 |
| C | -1.635099000 | 4.627362000  | 0.168290000  |
| H | -2.652825000 | 5.036581000  | 0.341468000  |
| H | -0.920149000 | 5.289544000  | 0.691157000  |
| H | -1.430904000 | 4.667193000  | -0.918533000 |
| C | -2.741238000 | 2.358965000  | 0.095464000  |
| H | -2.712520000 | 2.371762000  | -1.010624000 |
| H | -2.695443000 | 1.303462000  | 0.430011000  |
| H | -3.705721000 | 2.797787000  | 0.425863000  |
| O | -0.535243000 | 0.044067000  | -5.649924000 |
| C | -0.601908000 | -1.158766000 | -6.412878000 |
| H | 0.316263000  | -1.773704000 | -6.289874000 |
| H | -1.486053000 | -1.772770000 | -6.134237000 |
| H | -0.693039000 | -0.847959000 | -7.470193000 |

72

(p-MeO-POCOP)IrH<sub>2</sub> NS toI, E = -1914.030111

|    |              |              |              |
|----|--------------|--------------|--------------|
| Ir | 0.784246000  | -0.944442000 | -0.004255000 |
| P  | 2.301091000  | 0.763768000  | 0.016029000  |
| P  | -1.216209000 | -2.045357000 | 0.006624000  |
| O  | 1.343270000  | 2.220568000  | 0.023985000  |
| C  | 4.059622000  | 2.369471000  | 1.640437000  |
| O  | -2.424683000 | -0.785739000 | 0.003157000  |
| C  | 3.821164000  | 2.525291000  | -1.696090000 |
| C  | -3.173712000 | -3.421810000 | 1.615175000  |
| C  | -0.877949000 | 3.119196000  | 0.020071000  |
| C  | -1.009801000 | -4.283228000 | -1.662744000 |
| C  | -2.815790000 | 1.576016000  | 0.007892000  |
| C  | -0.734396000 | -4.090371000 | 1.853969000  |
| C  | -3.270715000 | -3.117075000 | -1.718957000 |
| C  | -1.912385000 | 0.492860000  | 0.002885000  |
| C  | 3.274759000  | 1.045357000  | 1.615933000  |
| C  | -2.278486000 | 2.887038000  | 0.015996000  |
| C  | -1.525009000 | -1.854019000 | 2.709662000  |
| C  | -0.506787000 | 0.673964000  | 0.002600000  |
| C  | 4.213478000  | -0.159658000 | 1.837351000  |
| C  | 2.241397000  | 0.844465000  | -2.703243000 |
| C  | -1.716755000 | -2.925361000 | 1.607935000  |
| C  | 4.411253000  | 0.049970000  | -1.680526000 |

|   |              |              |              |
|---|--------------|--------------|--------------|
| C | -0.018215000 | 2.010217000  | 0.014240000  |
| C | -1.747134000 | -2.931148000 | -1.583488000 |
| C | -1.248771000 | -1.997610000 | -2.714761000 |
| C | 3.276537000  | 1.089003000  | -1.576859000 |
| C | 2.192137000  | 1.060942000  | 2.723306000  |
| H | 4.940072000  | 2.340743000  | 0.972066000  |
| H | 3.420321000  | 3.225825000  | 1.353395000  |
| H | 4.431929000  | 2.548719000  | 2.671157000  |
| H | 3.025725000  | 3.271678000  | -1.512910000 |
| H | 4.655330000  | 2.719098000  | -0.999200000 |
| H | 4.206230000  | 2.675795000  | -2.726738000 |
| H | -3.877229000 | -2.621829000 | 1.315764000  |
| H | -3.317108000 | -4.292644000 | 0.948643000  |
| H | -3.439158000 | -3.745317000 | 2.643811000  |
| H | -0.497151000 | 4.148598000  | 0.029112000  |
| H | 0.075338000  | -4.164641000 | -1.470786000 |
| H | -1.418685000 | -5.018865000 | -0.943793000 |
| H | -1.134409000 | -4.706595000 | -2.681359000 |
| H | -3.894105000 | 1.381870000  | 0.008571000  |
| H | 0.315546000  | -3.740716000 | 1.822033000  |
| H | -0.929509000 | -4.519182000 | 2.859209000  |
| H | -0.854099000 | -4.903201000 | 1.113691000  |
| H | -3.669665000 | -3.863715000 | -1.010385000 |
| H | -3.805474000 | -2.161388000 | -1.564103000 |
| H | -3.495269000 | -3.477393000 | -2.745078000 |
| H | -0.494776000 | -1.446735000 | 2.692566000  |
| H | -2.230307000 | -1.011230000 | 2.580783000  |
| H | -1.711277000 | -2.319015000 | 3.700165000  |
| H | 5.034794000  | -0.192167000 | 1.097396000  |
| H | 4.671756000  | -0.078899000 | 2.845262000  |
| H | 3.656550000  | -1.115112000 | 1.783629000  |
| H | 1.395178000  | 1.555350000  | -2.635032000 |
| H | 2.736892000  | 0.986079000  | -3.686648000 |
| H | 1.828826000  | -0.182117000 | -2.651139000 |
| H | 4.036462000  | -0.977634000 | -1.501841000 |
| H | 4.845318000  | 0.085603000  | -2.701651000 |
| H | 5.228444000  | 0.258512000  | -0.963777000 |
| H | -0.152731000 | -1.849870000 | -2.657323000 |
| H | -1.502422000 | -2.450781000 | -3.696112000 |
| H | -1.729738000 | -1.001832000 | -2.657024000 |
| H | 1.507663000  | 1.922691000  | 2.607480000  |
| H | 1.585692000  | 0.134002000  | 2.699273000  |
| H | 2.690023000  | 1.139366000  | 3.712250000  |
| H | 1.610178000  | -1.981576000 | 0.888394000  |
| H | 1.682908000  | -2.066484000 | -0.745789000 |
| O | -3.051076000 | 4.016204000  | 0.021839000  |
| C | -4.466448000 | 3.871626000  | 0.010075000  |
| H | -4.819284000 | 3.337148000  | -0.899519000 |
| H | -4.833965000 | 3.327146000  | 0.907895000  |
| H | -4.882166000 | 4.896657000  | 0.012504000  |

84

(p-MeO-POCOP)IrH2-IC6F5 NS-bound-a1, E = -2938.867375

|    |             |            |            |
|----|-------------|------------|------------|
| Ir | 3.44816000  | 4.49192900 | 4.14731600 |
| P  | 1.46736100  | 3.56862700 | 3.46165400 |
| P  | 5.16117200  | 6.01115300 | 4.42793400 |
| O  | 0.67563900  | 4.82694200 | 2.57860700 |
| C  | 0.04643700  | 1.80482100 | 1.72299600 |
| O  | 4.62791100  | 7.40601700 | 3.54489700 |
| C  | -1.25993200 | 3.42845700 | 4.39396200 |
| C  | 7.46450800  | 7.17367800 | 3.19848400 |
| C  | 0.81397900  | 7.10080600 | 1.81749100 |
| C  | 5.64553200  | 5.65945500 | 7.17001500 |
| C  | 2.83866100  | 8.42795600 | 2.31668200 |
| C  | 7.83012400  | 5.09981000 | 4.60940600 |
| C  | 6.10723700  | 8.00065600 | 6.27995300 |
| C  | 3.37168000  | 7.30252800 | 2.97831100 |
| O  | 0.92711800  | 9.32946200 | 1.06856100 |
| C  | 1.46948900  | 2.21536300 | 2.14579100 |
| C  | 1.55209500  | 8.31088400 | 1.73525300 |
| C  | 6.65479800  | 4.93850300 | 2.37718900 |
| C  | 2.67592600  | 6.07552800 | 3.08435500 |
| C  | 2.26116400  | 1.00484000 | 2.68221700 |
| C  | 0.51910900  | 4.49738500 | 5.82129900 |
| C  | 6.87418000  | 5.81475000 | 3.63338200 |
| C  | 0.48993400  | 1.98446500 | 5.55377300 |
| C  | 1.38747500  | 6.01154400 | 2.48896800 |
| C  | 5.21211300  | 6.75415600 | 6.17076500 |
| C  | 3.74054400  | 7.14171800 | 6.45932600 |
| C  | 0.20691400  | 3.32820700 | 4.85304400 |
| C  | 2.21563900  | 2.82563300 | 0.93478500 |
| H  | -0.48082500 | 1.25854400 | 2.52729800 |
| H  | -0.55967300 | 2.68235300 | 1.42734800 |
| H  | 0.11483500  | 1.12476400 | 0.84828000 |
| H  | -1.44037400 | 4.36425700 | 3.83294600 |
| H  | -1.56286700 | 2.57574500 | 3.76163800 |
| H  | -1.91347000 | 3.42931700 | 5.29159100 |
| H  | 6.81589200  | 7.67830800 | 2.45981300 |
| H  | 7.62348200  | 7.86040400 | 4.04855100 |
| H  | 8.45178500  | 6.98495500 | 2.72731200 |
| H  | -0.18277900 | 7.03798900 | 1.36202800 |
| H  | 5.04665200  | 4.73724400 | 7.03749900 |
| H  | 6.71324300  | 5.39588800 | 7.06946900 |
| H  | 5.48601500  | 6.03426900 | 8.20264600 |
| H  | 3.42301700  | 9.35366800 | 2.26969000 |
| H  | 7.38353300  | 4.17691400 | 5.02424500 |
| H  | 8.74612800  | 4.80265500 | 4.05879700 |
| H  | 8.13642800  | 5.75961600 | 5.44276300 |
| H  | 7.17894700  | 7.75125800 | 6.16703800 |
| H  | 5.83491900  | 8.75962800 | 5.52193100 |
| H  | 5.97576100  | 8.45502000 | 7.28464200 |
| H  | 6.36223600  | 3.90798700 | 2.65106100 |
| H  | 5.87651800  | 5.36400100 | 1.71349400 |
| H  | 7.60568800  | 4.88539200 | 1.80764300 |
| H  | 1.75999000  | 0.51951200 | 3.53961900 |



|   |              |              |             |
|---|--------------|--------------|-------------|
| H | 2.353654000  | 0.250795000  | 1.873190000 |
| H | 3.279838000  | 1.296541000  | 3.000469000 |
| H | 0.399557000  | 5.481877000  | 5.328118000 |
| H | -0.176023000 | 4.457347000  | 6.685523000 |
| H | 1.554631000  | 4.420509000  | 6.215794000 |
| H | 1.564036000  | 1.874671000  | 5.804738000 |
| H | -0.089324000 | 1.939276000  | 6.499501000 |
| H | 0.181160000  | 1.123365000  | 4.931049000 |
| H | 3.071713000  | 6.257956000  | 6.409926000 |
| H | 3.670585000  | 7.556501000  | 7.486080000 |
| H | 3.363514000  | 7.901400000  | 5.749248000 |
| H | 1.666663000  | 3.687421000  | 0.511301000 |
| H | 3.233061000  | 3.164143000  | 1.210119000 |
| H | 2.310137000  | 2.048502000  | 0.148685000 |
| I | 5.612770000  | 1.781556000  | 4.939191000 |
| F | 8.106943000  | -3.008460000 | 6.109965000 |
| F | 10.397828000 | -2.369396000 | 4.737817000 |
| F | 6.029105000  | -1.235901000 | 6.208112000 |
| F | 10.615510000 | 0.051305000  | 3.458620000 |
| F | 8.549741000  | 1.836326000  | 3.542340000 |
| C | 8.203779000  | -1.820374000 | 5.487267000 |
| C | 7.142366000  | -0.895180000 | 5.526938000 |
| C | 7.233595000  | 0.348146000  | 4.880897000 |
| C | 8.413952000  | 0.654482000  | 4.183003000 |
| C | 9.489482000  | -0.252692000 | 4.128601000 |
| C | 9.380151000  | -1.495461000 | 4.783407000 |
| H | 4.231762000  | 3.709296000  | 3.077120000 |
| H | 3.857861000  | 3.282185000  | 5.258509000 |
| C | 1.606303000  | 10.575714000 | 0.942780000 |
| H | 1.817956000  | 11.030650000 | 1.935456000 |
| H | 2.563392000  | 10.468039000 | 0.386549000 |
| H | 0.929036000  | 11.240829000 | 0.375417000 |

84

(p-MeO-POCOP)IrH2-IC6F5 NS-bound-a2, E = -2938.867901

|    |              |              |             |
|----|--------------|--------------|-------------|
| Ir | 2.582910000  | 4.199336000  | 4.650901000 |
| P  | 1.244089000  | 2.342811000  | 4.516183000 |
| P  | 3.466830000  | 6.261042000  | 4.209118000 |
| O  | -0.073514000 | 2.835371000  | 3.490845000 |
| C  | 0.797839000  | -0.243094000 | 3.368996000 |
| O  | 2.320313000  | 7.007406000  | 3.133938000 |
| C  | -1.076189000 | 1.170228000  | 5.777192000 |
| C  | 5.418467000  | 7.786961000  | 2.766868000 |
| C  | -0.988327000 | 4.607072000  | 2.159778000 |
| C  | 4.599580000  | 7.259746000  | 6.558929000 |
| C  | 0.238683000  | 6.750692000  | 1.974970000 |
| C  | 6.164899000  | 5.618578000  | 3.860272000 |
| C  | 3.369288000  | 8.989958000  | 5.150361000 |
| C  | 1.232776000  | 6.218067000  | 2.819394000 |
| O  | -1.897322000 | 6.332250000  | 0.847615000 |
| C  | 1.863874000  | 0.857640000  | 3.521284000 |
| C  | -0.870524000 | 5.928653000  | 1.652301000 |
| C  | 4.649266000  | 5.567359000  | 1.842187000 |

|   |              |              |             |
|---|--------------|--------------|-------------|
| C | 1.159314000  | 4.903888000  | 3.348903000 |
| C | 3.138586000  | 0.301367000  | 4.188843000 |
| C | -0.060880000 | 3.277198000  | 6.706855000 |
| C | 5.015935000  | 6.345541000  | 3.129294000 |
| C | 1.152892000  | 1.078958000  | 7.006375000 |
| C | 0.024608000  | 4.118781000  | 2.996981000 |
| C | 3.405751000  | 7.522799000  | 5.618834000 |
| C | 2.080308000  | 7.190721000  | 6.350063000 |
| C | 0.249226000  | 1.900941000  | 6.065758000 |
| C | 2.223747000  | 1.431633000  | 2.129237000 |
| H | 0.610211000  | -0.769380000 | 4.323548000 |
| H | -0.158303000 | 0.164069000  | 2.988722000 |
| H | 1.163463000  | -0.996785000 | 2.640412000 |
| H | -1.688031000 | 1.725860000  | 5.042346000 |
| H | -0.920773000 | 0.144075000  | 5.401518000 |
| H | -1.652516000 | 1.096572000  | 6.723440000 |
| H | 4.567830000  | 8.352792000  | 2.341281000 |
| H | 5.813724000  | 8.337106000  | 3.641176000 |
| H | 6.223782000  | 7.753020000  | 2.003472000 |
| H | -1.860399000 | 3.997221000  | 1.890729000 |
| H | 4.683320000  | 6.185723000  | 6.820190000 |
| H | 5.556235000  | 7.590621000  | 6.111400000 |
| H | 4.454164000  | 7.830660000  | 7.499565000 |
| H | 0.343278000  | 7.772058000  | 1.592605000 |
| H | 5.881563000  | 4.583963000  | 4.131368000 |
| H | 7.045244000  | 5.572743000  | 3.185927000 |
| H | 6.474683000  | 6.141614000  | 4.783573000 |
| H | 4.325130000  | 9.314997000  | 4.704182000 |
| H | 2.561429000  | 9.154453000  | 4.413058000 |
| H | 3.172861000  | 9.638210000  | 6.030122000 |
| H | 4.307807000  | 4.540416000  | 2.075100000 |
| H | 3.847974000  | 6.077308000  | 1.275039000 |
| H | 5.549264000  | 5.503169000  | 1.196446000 |
| H | 2.952517000  | -0.103594000 | 5.200098000 |
| H | 3.538147000  | -0.523688000 | 3.563032000 |
| H | 3.921067000  | 1.077409000  | 4.276093000 |
| H | -0.656428000 | 3.916555000  | 6.025819000 |
| H | -0.646700000 | 3.123184000  | 7.636988000 |
| H | 0.872408000  | 3.817280000  | 6.964854000 |
| H | 2.143627000  | 1.556991000  | 7.142044000 |
| H | 0.669120000  | 1.005386000  | 8.002629000 |
| H | 1.307287000  | 0.048910000  | 6.632029000 |
| H | 2.085905000  | 6.151630000  | 6.736812000 |
| H | 1.953611000  | 7.883930000  | 7.207608000 |
| H | 1.206315000  | 7.307050000  | 5.679577000 |
| H | 1.327072000  | 1.803523000  | 1.598880000 |
| H | 2.947728000  | 2.265141000  | 2.211950000 |
| H | 2.682000000  | 0.625684000  | 1.519588000 |
| I | 5.230154000  | 2.574465000  | 6.687937000 |
| F | 7.718653000  | -2.197245000 | 7.732765000 |
| F | 9.731214000  | -1.068235000 | 9.221327000 |
| F | 5.774724000  | -0.621686000 | 6.637994000 |

|   |              |              |              |
|---|--------------|--------------|--------------|
| F | 9.801869000  | 1.647938000  | 9.618086000  |
| F | 7.867211000  | 3.241691000  | 8.532383000  |
| C | 7.744757000  | -0.866429000 | 7.922195000  |
| C | 6.750481000  | -0.039446000 | 7.364975000  |
| C | 6.768990000  | 1.353250000  | 7.557328000  |
| C | 7.807227000  | 1.911922000  | 8.321666000  |
| C | 8.812304000  | 1.104166000  | 8.888409000  |
| C | 8.778602000  | -0.289626000 | 8.686122000  |
| H | 3.853302000  | 3.434678000  | 4.167965000  |
| H | 3.403446000  | 3.898804000  | 6.066589000  |
| C | -1.855585000 | 7.645393000  | 0.292545000  |
| H | -1.849572000 | 8.425168000  | 1.085104000  |
| H | -0.965648000 | 7.786787000  | -0.358743000 |
| H | -2.772802000 | 7.751477000  | -0.315780000 |

68

(p-H-POCOP)IrH<sub>2</sub> S tol, E = -1799.616265

|    |              |              |              |
|----|--------------|--------------|--------------|
| C  | -0.354701000 | 1.218808000  | -3.616747000 |
| C  | -0.231283000 | 1.204982000  | -2.211333000 |
| C  | -0.172435000 | -0.010706000 | -1.481486000 |
| C  | -0.239840000 | -1.230008000 | -2.204501000 |
| C  | -0.361687000 | -1.250776000 | -3.609990000 |
| C  | -0.417591000 | -0.017679000 | -4.292849000 |
| H  | -0.399448000 | 2.171636000  | -4.162545000 |
| H  | -0.411545000 | -2.206276000 | -4.150646000 |
| H  | -0.513358000 | -0.020402000 | -5.389901000 |
| O  | -0.185125000 | -2.423510000 | -1.516105000 |
| O  | -0.164652000 | 2.401992000  | -1.529944000 |
| P  | -0.029182000 | -2.259496000 | 0.211691000  |
| P  | -0.017943000 | 2.246393000  | 0.199413000  |
| Ir | 0.007246000  | -0.005656000 | 0.590183000  |
| H  | 0.936161000  | 0.012527000  | 1.899522000  |
| H  | -0.656487000 | -0.015036000 | 2.054810000  |
| C  | 1.600025000  | -3.196077000 | 0.450822000  |
| C  | -1.580344000 | -3.222162000 | 0.720651000  |
| C  | 1.601390000  | 3.204310000  | 0.426445000  |
| C  | -1.579004000 | 3.189429000  | 0.712091000  |
| C  | 1.979332000  | -3.145151000 | 1.946286000  |
| H  | 2.999074000  | -3.565190000 | 2.073100000  |
| H  | 1.982715000  | -2.103521000 | 2.321403000  |
| H  | 1.291012000  | -3.740448000 | 2.574683000  |
| C  | -1.522872000 | -3.480437000 | 2.239787000  |
| H  | -1.281837000 | -2.555213000 | 2.800426000  |
| H  | -2.513802000 | -3.842558000 | 2.585009000  |
| H  | -0.775986000 | -4.255477000 | 2.497953000  |
| C  | 2.632821000  | -2.379886000 | -0.365119000 |
| H  | 2.409849000  | -2.412147000 | -1.448436000 |
| H  | 2.642787000  | -1.318698000 | -0.045619000 |
| H  | 3.642280000  | -2.811613000 | -0.202442000 |
| C  | 1.563277000  | -4.647335000 | -0.060206000 |
| H  | 2.596076000  | -5.055325000 | -0.061357000 |
| H  | 0.951652000  | -5.298907000 | 0.591312000  |

|   |              |              |              |
|---|--------------|--------------|--------------|
| H | 1.171646000  | -4.704922000 | -1.093552000 |
| C | -1.784797000 | -4.534469000 | -0.060831000 |
| H | -1.049893000 | -5.310036000 | 0.216936000  |
| H | -2.794874000 | -4.932929000 | 0.171545000  |
| H | -1.724203000 | -4.364223000 | -1.151959000 |
| C | -2.745539000 | -2.253905000 | 0.397355000  |
| H | -2.638445000 | -1.299512000 | 0.948891000  |
| H | -2.786176000 | -2.019624000 | -0.684168000 |
| H | -3.704539000 | -2.733174000 | 0.685825000  |
| C | 1.818172000  | 3.455325000  | 1.932368000  |
| H | 1.679816000  | 2.527608000  | 2.522759000  |
| H | 2.855679000  | 3.814687000  | 2.095692000  |
| H | 1.131471000  | 4.229805000  | 2.324319000  |
| C | -1.686794000 | 3.158813000  | 2.251508000  |
| H | -2.669040000 | 3.580048000  | 2.551736000  |
| H | -1.620482000 | 2.122423000  | 2.635352000  |
| H | -0.899624000 | 3.763413000  | 2.739298000  |
| C | 2.687561000  | 2.235649000  | -0.104483000 |
| H | 2.678204000  | 1.278666000  | 0.452740000  |
| H | 2.533867000  | 2.006838000  | -1.176945000 |
| H | 3.683787000  | 2.711982000  | 0.010413000  |
| C | 1.665573000  | 4.519637000  | -0.373595000 |
| H | 0.995971000  | 5.295822000  | 0.036161000  |
| H | 2.702416000  | 4.914241000  | -0.326437000 |
| H | 1.407833000  | 4.354784000  | -1.436451000 |
| C | -1.636316000 | 4.633582000  | 0.182675000  |
| H | -2.654821000 | 5.040565000  | 0.356319000  |
| H | -0.922782000 | 5.295283000  | 0.708009000  |
| H | -1.431365000 | 4.676891000  | -0.903868000 |
| C | -2.738865000 | 2.363306000  | 0.102823000  |
| H | -2.709797000 | 2.378923000  | -1.003207000 |
| H | -2.691804000 | 1.306959000  | 0.434865000  |
| H | -3.704305000 | 2.799432000  | 0.433853000  |

68

(p-H-POCOP)IrH<sub>2</sub> NS tol, E = -1799.616415

|    |              |              |              |
|----|--------------|--------------|--------------|
| C  | -0.048925000 | 1.234677000  | -3.638108000 |
| C  | -0.023826000 | 1.217198000  | -2.227635000 |
| C  | -0.007486000 | 0.000004000  | -1.498104000 |
| C  | -0.024858000 | -1.217188000 | -2.227619000 |
| C  | -0.049953000 | -1.234680000 | -3.638091000 |
| C  | -0.060199000 | -0.000002000 | -4.320482000 |
| H  | -0.062674000 | 2.188985000  | -4.183016000 |
| H  | -0.064499000 | -2.188985000 | -4.182981000 |
| H  | -0.079977000 | 0.000000000  | -5.421511000 |
| O  | -0.025607000 | -2.412480000 | -1.539352000 |
| O  | -0.023554000 | 2.412498000  | -1.539411000 |
| P  | 0.002049000  | -2.252724000 | 0.195197000  |
| P  | 0.002373000  | 2.252826000  | 0.195104000  |
| Ir | 0.037612000  | 0.000026000  | 0.581039000  |
| H  | 0.692683000  | 0.000235000  | 2.069935000  |
| H  | -0.924594000 | 0.000136000  | 1.841349000  |
| C  | 1.596428000  | -3.221766000 | 0.532196000  |

|   |              |              |              |
|---|--------------|--------------|--------------|
| C | -1.592547000 | -3.185498000 | 0.609311000  |
| C | 1.596402000  | 3.221726000  | 0.533752000  |
| C | -1.592694000 | 3.185563000  | 0.607569000  |
| C | 1.689632000  | -3.506372000 | 2.044687000  |
| H | 2.709733000  | -3.873088000 | 2.283889000  |
| H | 1.505729000  | -2.591064000 | 2.642108000  |
| H | 0.971631000  | -4.286939000 | 2.361712000  |
| C | -1.814467000 | -3.125583000 | 2.135897000  |
| H | -1.787493000 | -2.081860000 | 2.503805000  |
| H | -2.812134000 | -3.552104000 | 2.370561000  |
| H | -1.059696000 | -3.710700000 | 2.693362000  |
| C | 2.720604000  | -2.241365000 | 0.113528000  |
| H | 2.653901000  | -1.986840000 | -0.962224000 |
| H | 2.664744000  | -1.298183000 | 0.692353000  |
| H | 3.706001000  | -2.718649000 | 0.297264000  |
| C | 1.728048000  | -4.518949000 | -0.288875000 |
| H | 2.755472000  | -4.919383000 | -0.157834000 |
| H | 1.022159000  | -5.301142000 | 0.040665000  |
| H | 1.566811000  | -4.328866000 | -1.366345000 |
| C | -1.602645000 | -4.641031000 | 0.108636000  |
| H | -0.919202000 | -5.283664000 | 0.694505000  |
| H | -2.626799000 | -5.054431000 | 0.223559000  |
| H | -1.325936000 | -4.705138000 | -0.960879000 |
| C | -2.707216000 | -2.379492000 | -0.101778000 |
| H | -2.687441000 | -1.315591000 | 0.206694000  |
| H | -2.597505000 | -2.421642000 | -1.201960000 |
| H | -3.692637000 | -2.812504000 | 0.168895000  |
| C | 1.687850000  | 3.506407000  | 2.046349000  |
| H | 1.503286000  | 2.591074000  | 2.643530000  |
| H | 2.707644000  | 3.873194000  | 2.286734000  |
| H | 0.969383000  | 4.286908000  | 2.362473000  |
| C | -1.816390000 | 3.125326000  | 2.133891000  |
| H | -2.814337000 | 3.551774000  | 2.367497000  |
| H | -1.789835000 | 2.081522000  | 2.501604000  |
| H | -1.062276000 | 3.710370000  | 2.692325000  |
| C | 2.720980000  | 2.241206000  | 0.116507000  |
| H | 2.664474000  | 1.298177000  | 0.695531000  |
| H | 2.655393000  | 1.986470000  | -0.959261000 |
| H | 3.706201000  | 2.718508000  | 0.301138000  |
| C | 1.728983000  | 4.518830000  | -0.287266000 |
| H | 1.022550000  | 5.300954000  | 0.041279000  |
| H | 2.756184000  | 4.919411000  | -0.154910000 |
| H | 1.569214000  | 4.328609000  | -1.364931000 |
| C | -1.602219000 | 4.641230000  | 0.107238000  |
| H | -2.626505000 | 5.054577000  | 0.221215000  |
| H | -0.919410000 | 5.283676000  | 0.694056000  |
| H | -1.324410000 | 4.705650000  | -0.961981000 |
| C | -2.706478000 | 2.379697000  | -0.105088000 |
| H | -2.595864000 | 2.422864000  | -1.205135000 |
| H | -2.686451000 | 1.315508000  | 0.202390000  |
| H | -3.692289000 | 2.812079000  | 0.165167000  |

80

(p-H-POCOP)IrH2-IC6F5 NS-bound-a1, E = -2824.453636

|    |              |             |             |
|----|--------------|-------------|-------------|
| Ir | 3.001430000  | 4.046085000 | 4.100840000 |
| P  | 1.062575000  | 3.034240000 | 3.414446000 |
| P  | 4.643505000  | 5.643488000 | 4.397226000 |
| O  | 0.247058000  | 4.238141000 | 2.485793000 |
| C  | -0.330090000 | 1.201279000 | 1.735360000 |
| O  | 4.086826000  | 6.986888000 | 3.461820000 |
| C  | -1.652578000 | 2.898432000 | 4.378873000 |
| C  | 6.953800000  | 6.870842000 | 3.247022000 |
| C  | 0.319406000  | 6.503105000 | 1.656755000 |
| C  | 5.018185000  | 5.353702000 | 7.163097000 |
| C  | 2.279392000  | 7.907877000 | 2.158834000 |
| C  | 7.326493000  | 4.815440000 | 4.684486000 |
| C  | 5.471673000  | 7.686576000 | 6.248537000 |
| C  | 2.848023000  | 6.828072000 | 2.864363000 |
| H  | 0.559622000  | 8.560866000 | 1.004221000 |
| C  | 1.088831000  | 1.633496000 | 2.151426000 |
| C  | 1.015586000  | 7.726481000 | 1.558835000 |
| C  | 6.242125000  | 4.611243000 | 2.407245000 |
| C  | 2.188870000  | 5.580460000 | 2.985884000 |
| C  | 1.885051000  | 0.448224000 | 2.734204000 |
| C  | 0.138675000  | 4.016225000 | 5.755507000 |
| C  | 6.388934000  | 5.496753000 | 3.667514000 |
| C  | 0.117431000  | 1.497596000 | 5.560394000 |
| C  | 0.918717000  | 5.447374000 | 2.372056000 |
| C  | 4.605625000  | 6.420848000 | 6.125838000 |
| C  | 3.117587000  | 6.788562000 | 6.345832000 |
| C  | -0.180862000 | 2.818906000 | 4.824606000 |
| C  | 1.840449000  | 2.205378000 | 0.925404000 |
| H  | -0.860371000 | 0.684687000 | 2.557161000 |
| H  | -0.937426000 | 2.064626000 | 1.402776000 |
| H  | -0.253677000 | 0.488071000 | 0.888208000 |
| H  | -1.845888000 | 3.820769000 | 3.800173000 |
| H  | -1.953474000 | 2.030421000 | 3.766315000 |
| H  | -2.297826000 | 2.912197000 | 5.282391000 |
| H  | 6.311574000  | 7.357340000 | 2.490784000 |
| H  | 7.072521000  | 7.561662000 | 4.099992000 |
| H  | 7.957732000  | 6.708141000 | 2.802180000 |
| H  | -0.666963000 | 6.366474000 | 1.191511000 |
| H  | 4.429173000  | 4.424146000 | 7.037193000 |
| H  | 6.089719000  | 5.094033000 | 7.097107000 |
| H  | 4.829083000  | 5.752399000 | 8.181687000 |
| H  | 2.816294000  | 8.864123000 | 2.085122000 |
| H  | 6.890323000  | 3.882704000 | 5.088559000 |
| H  | 8.271462000  | 4.541164000 | 4.172598000 |
| H  | 7.579724000  | 5.489468000 | 5.524252000 |
| H  | 6.551928000  | 7.455914000 | 6.191963000 |
| H  | 5.220864000  | 8.424109000 | 5.462442000 |
| H  | 5.283969000  | 8.159411000 | 7.235577000 |
| H  | 5.961011000  | 3.575258000 | 2.671464000 |
| H  | 5.485563000  | 5.019998000 | 1.708669000 |
| H  | 7.217377000  | 4.576314000 | 1.879176000 |

|   |              |              |             |
|---|--------------|--------------|-------------|
| H | 1.375361000  | -0.020474000 | 3.595583000 |
| H | 2.000154000  | -0.325992000 | 1.947496000 |
| H | 2.895169000  | 0.761159000  | 3.059790000 |
| H | 0.000925000  | 4.987114000  | 5.241046000 |
| H | -0.535347000 | 3.993832000  | 6.636862000 |
| H | 1.182511000  | 3.954799000  | 6.135254000 |
| H | 1.194850000  | 1.399716000  | 5.801809000 |
| H | -0.450361000 | 1.477377000  | 6.513904000 |
| H | -0.194742000 | 0.617747000  | 4.966524000 |
| H | 2.461347000  | 5.897403000  | 6.276284000 |
| H | 2.996649000  | 7.211282000  | 7.364469000 |
| H | 2.761977000  | 7.536362000  | 5.612662000 |
| H | 1.300752000  | 3.061075000  | 0.478344000 |
| H | 2.861893000  | 2.538559000  | 1.192520000 |
| H | 1.929007000  | 1.407120000  | 0.160133000 |
| I | 5.265802000  | 1.401310000  | 4.825798000 |
| F | 7.904825000  | -3.372674000 | 5.696303000 |
| F | 10.183343000 | -2.570696000 | 4.390468000 |
| F | 5.770636000  | -1.677697000 | 5.894279000 |
| F | 10.331955000 | -0.063403000 | 3.279266000 |
| F | 8.209720000  | 1.645645000  | 3.464004000 |
| C | 7.967919000  | -2.142965000 | 5.155710000 |
| C | 6.876962000  | -1.256689000 | 5.247736000 |
| C | 6.932768000  | 0.029769000  | 4.687628000 |
| C | 8.107350000  | 0.419598000  | 4.022352000 |
| C | 9.211874000  | -0.447399000 | 3.917165000 |
| C | 9.137947000  | -1.734505000 | 4.485581000 |
| H | 3.784265000  | 3.423183000  | 2.934453000 |
| H | 3.481437000  | 2.840582000  | 5.198239000 |

80

(p-H-POCOP)IrH2-IC6F5 NS-bound-a2, E = -2824.453483

|    |              |              |             |
|----|--------------|--------------|-------------|
| Ir | 2.580316000  | 4.222320000  | 4.658206000 |
| P  | 1.245533000  | 2.355968000  | 4.540574000 |
| P  | 3.456720000  | 6.285976000  | 4.194015000 |
| O  | -0.054061000 | 2.824734000  | 3.494569000 |
| C  | 0.791117000  | -0.273795000 | 3.519585000 |
| O  | 2.356664000  | 6.982856000  | 3.056354000 |
| C  | -1.095730000 | 1.282606000  | 5.846607000 |
| C  | 5.472205000  | 7.849681000  | 2.904738000 |
| C  | -0.937429000 | 4.555769000  | 2.066268000 |
| C  | 4.455090000  | 7.339001000  | 6.585478000 |
| C  | 0.295033000  | 6.679080000  | 1.841074000 |
| C  | 6.168604000  | 5.659642000  | 3.993317000 |
| C  | 3.195598000  | 9.005605000  | 5.124150000 |
| C  | 1.274025000  | 6.182796000  | 2.724954000 |
| C  | 1.858684000  | 0.833249000  | 3.602251000 |
| C  | -0.801786000 | 5.850520000  | 1.522198000 |
| C  | 4.781032000  | 5.648103000  | 1.883231000 |
| C  | 1.184340000  | 4.884864000  | 3.289975000 |
| C  | 3.144959000  | 0.312161000  | 4.274249000 |
| C  | -0.011332000 | 3.389689000  | 6.701081000 |
| C  | 5.062437000  | 6.396513000  | 3.208409000 |

|   |              |              |             |
|---|--------------|--------------|-------------|
| C | 1.138646000  | 1.167793000  | 7.067366000 |
| C | 0.060207000  | 4.091228000  | 2.947024000 |
| C | 3.289059000  | 7.542984000  | 5.597546000 |
| C | 1.954085000  | 7.139645000  | 6.274247000 |
| C | 0.251240000  | 1.983015000  | 6.105912000 |
| C | 2.191850000  | 1.340345000  | 2.178203000 |
| H | 0.612455000  | -0.747755000 | 4.502897000 |
| H | -0.168343000 | 0.113351000  | 3.126807000 |
| H | 1.149605000  | -1.065562000 | 2.828952000 |
| H | -1.697204000 | 1.835404000  | 5.101125000 |
| H | -0.969587000 | 0.243581000  | 5.495961000 |
| H | -1.667094000 | 1.248474000  | 6.798108000 |
| H | 4.648126000  | 8.413861000  | 2.427684000 |
| H | 5.793763000  | 8.386247000  | 3.816884000 |
| H | 6.332275000  | 7.841123000  | 2.202933000 |
| H | -1.796288000 | 3.917203000  | 1.815963000 |
| H | 4.573663000  | 6.271660000  | 6.860402000 |
| H | 5.413566000  | 7.706778000  | 6.172104000 |
| H | 4.248954000  | 7.911199000  | 7.513933000 |
| H | 0.392142000  | 7.688359000  | 1.416910000 |
| H | 5.878674000  | 4.615678000  | 4.217643000 |
| H | 7.092031000  | 5.640425000  | 3.378014000 |
| H | 6.411198000  | 6.158405000  | 4.949620000 |
| H | 4.148959000  | 9.376221000  | 4.708811000 |
| H | 2.406622000  | 9.128132000  | 4.358797000 |
| H | 2.937644000  | 9.645210000  | 5.994321000 |
| H | 4.441246000  | 4.610292000  | 2.065457000 |
| H | 4.009148000  | 6.164099000  | 1.282292000 |
| H | 5.718754000  | 5.607556000  | 1.291721000 |
| H | 2.977436000  | -0.040541000 | 5.307958000 |
| H | 3.536089000  | -0.543314000 | 3.685154000 |
| H | 3.927321000  | 1.092399000  | 4.309285000 |
| H | -0.584508000 | 4.028680000  | 6.000670000 |
| H | -0.598662000 | 3.291741000  | 7.637642000 |
| H | 0.942821000  | 3.900251000  | 6.949567000 |
| H | 2.140349000  | 1.627173000  | 7.186622000 |
| H | 0.656484000  | 1.133266000  | 8.066501000 |
| H | 1.268754000  | 0.124593000  | 6.721514000 |
| H | 2.004839000  | 6.103639000  | 6.671137000 |
| H | 1.753013000  | 7.819598000  | 7.127908000 |
| H | 1.101228000  | 7.207353000  | 5.570839000 |
| H | 1.285321000  | 1.683368000  | 1.645628000 |
| H | 2.916314000  | 2.177171000  | 2.202718000 |
| H | 2.643145000  | 0.506776000  | 1.601661000 |
| I | 5.287364000  | 2.535710000  | 6.677973000 |
| F | 7.717814000  | -2.304751000 | 7.549278000 |
| F | 9.786122000  | -1.247741000 | 9.014408000 |
| F | 5.776179000  | -0.669721000 | 6.541867000 |
| F | 9.913957000  | 1.456116000  | 9.476411000 |
| F | 7.982034000  | 3.109260000  | 8.478200000 |
| C | 7.772079000  | -0.979584000 | 7.770718000 |
| C | 6.779568000  | -0.121752000 | 7.258800000 |



|   |              |              |             |
|---|--------------|--------------|-------------|
| C | 6.826769000  | 1.264888000  | 7.484875000 |
| C | 7.893069000  | 1.786201000  | 8.236377000 |
| C | 8.897311000  | 0.947674000  | 8.758332000 |
| C | 8.834488000  | -0.439799000 | 8.522375000 |
| H | 3.680460000  | 3.524462000  | 3.833637000 |
| H | 3.574213000  | 3.854649000  | 5.968616000 |
| H | -1.574349000 | 6.225958000  | 0.833699000 |

80

(p-H-POCOP)IrH2-IC6F5 NS-bound-b, E = -2824.457418

|    |              |              |              |
|----|--------------|--------------|--------------|
| Ir | 1.145992000  | -0.473418000 | -0.758362000 |
| P  | 1.547775000  | 1.782798000  | -0.417651000 |
| P  | 1.467520000  | -2.771870000 | -0.711692000 |
| O  | 3.165134000  | 1.841321000  | 0.164134000  |
| C  | 2.084775000  | 4.344365000  | -1.601553000 |
| O  | 3.115091000  | -2.948417000 | -0.253504000 |
| C  | 1.535161000  | 3.785635000  | 1.644608000  |
| C  | 1.849499000  | -5.194766000 | -2.207879000 |
| C  | 5.104156000  | 0.583031000  | 0.832990000  |
| C  | -0.728226000 | -4.241529000 | 0.350026000  |
| C  | 5.079769000  | -1.865185000 | 0.617570000  |
| C  | 0.075523000  | -3.547119000 | -2.991245000 |
| C  | 1.566712000  | -4.957453000 | 1.143624000  |
| C  | 3.748105000  | -1.789007000 | 0.163547000  |
| H  | 6.782598000  | -0.709759000 | 1.315603000  |
| C  | 1.696524000  | 2.893343000  | -1.942504000 |
| C  | 5.741540000  | -0.668212000 | 0.960825000  |
| C  | 2.527361000  | -3.000483000 | -3.237097000 |
| C  | 3.039751000  | -0.564359000 | 0.089827000  |
| C  | 0.351581000  | 2.843253000  | -2.699533000 |
| C  | 0.611691000  | 1.511513000  | 2.139842000  |
| C  | 1.472888000  | -3.708286000 | -2.353602000 |
| C  | -0.701870000 | 3.110519000  | 0.658887000  |
| C  | 3.772026000  | 0.614488000  | 0.374394000  |
| C  | 0.686462000  | -3.759783000 | 0.723783000  |
| C  | 0.624344000  | -2.769890000 | 1.913305000  |
| C  | 0.702093000  | 2.622748000  | 1.064779000  |
| C  | 2.806509000  | 2.264378000  | -2.817603000 |
| H  | 1.273387000  | 4.876871000  | -1.072145000 |
| H  | 3.003779000  | 4.386493000  | -0.986539000 |
| H  | 2.280587000  | 4.893041000  | -2.546443000 |
| H  | 2.565419000  | 3.465177000  | 1.884392000  |
| H  | 1.583745000  | 4.655643000  | 0.968252000  |
| H  | 1.047913000  | 4.119663000  | 2.584508000  |
| H  | 2.816766000  | -5.319485000 | -1.684894000 |
| H  | 1.073315000  | -5.769186000 | -1.669476000 |
| H  | 1.948706000  | -5.638961000 | -3.220309000 |
| H  | 5.629071000  | 1.520909000  | 1.062749000  |
| H  | -1.365077000 | -3.423862000 | -0.033313000 |
| H  | -0.699889000 | -5.052146000 | -0.402445000 |
| H  | -1.221115000 | -4.646520000 | 1.258282000  |
| H  | 5.585240000  | -2.839132000 | 0.679617000  |
| H  | -0.201652000 | -2.478913000 | -3.078451000 |

|   |              |              |              |
|---|--------------|--------------|--------------|
| H | 0.093191000  | -3.988581000 | -4.009265000 |
| H | -0.713257000 | -4.062800000 | -2.413438000 |
| H | 1.641474000  | -5.729977000 | 0.359787000  |
| H | 2.587195000  | -4.634637000 | 1.417845000  |
| H | 1.099217000  | -5.427503000 | 2.034046000  |
| H | 2.272411000  | -1.935971000 | -3.401159000 |
| H | 3.537230000  | -3.055192000 | -2.788495000 |
| H | 2.554917000  | -3.500812000 | -4.226949000 |
| H | -0.472416000 | 3.302528000  | -2.122649000 |
| H | 0.454259000  | 3.406410000  | -3.650323000 |
| H | 0.066618000  | 1.800784000  | -2.938701000 |
| H | 1.613916000  | 1.119410000  | 2.400508000  |
| H | 0.152868000  | 1.934589000  | 3.056553000  |
| H | -0.019073000 | 0.667684000  | 1.808803000  |
| H | -1.289906000 | 2.315506000  | 0.163514000  |
| H | -1.257107000 | 3.414249000  | 1.569561000  |
| H | -0.649048000 | 3.988647000  | -0.012400000 |
| H | -0.061652000 | -1.926665000 | 1.715057000  |
| H | 0.251832000  | -3.310628000 | 2.807755000  |
| H | 1.622715000  | -2.354875000 | 2.152570000  |
| H | 3.780936000  | 2.253461000  | -2.293907000 |
| H | 2.556241000  | 1.227800000  | -3.114095000 |
| H | 2.912353000  | 2.866707000  | -3.743284000 |
| I | -1.760950000 | -0.570079000 | -0.289358000 |
| F | -4.460045000 | 0.619964000  | 4.449035000  |
| F | -5.957454000 | -1.680664000 | 4.417429000  |
| F | -2.708559000 | 1.142647000  | 2.417122000  |
| F | -5.728983000 | -3.457249000 | 2.337387000  |
| F | -3.983967000 | -2.953827000 | 0.291633000  |
| C | -4.333228000 | -0.246386000 | 3.427047000  |
| C | -3.436791000 | 0.002191000  | 2.369608000  |
| C | -3.303764000 | -0.890269000 | 1.298565000  |
| C | -4.077945000 | -2.058085000 | 1.302585000  |
| C | -4.983716000 | -2.336741000 | 2.344291000  |
| C | -5.103061000 | -1.426610000 | 3.413692000  |
| H | 1.959118000  | -0.399846000 | -2.066771000 |
| H | -0.105149000 | -0.356468000 | -1.886844000 |

92

(p-H-POCOP)IrH<sub>2</sub>-(IC<sub>6</sub>F<sub>5</sub>)<sub>2</sub> NS-bound-c, E = -3849.291583

|    |              |             |             |
|----|--------------|-------------|-------------|
| Ir | 3.701280000  | 3.427109000 | 3.676093000 |
| P  | 1.670639000  | 2.368250000 | 3.271754000 |
| P  | 5.316537000  | 5.101886000 | 3.655723000 |
| O  | 0.580985000  | 3.667255000 | 2.989043000 |
| C  | 0.055574000  | 1.543328000 | 1.047866000 |
| O  | 4.399586000  | 6.543539000 | 3.482290000 |
| C  | -0.692200000 | 1.124980000 | 4.322368000 |
| C  | 6.682428000  | 6.740352000 | 1.744839000 |
| C  | 0.328742000  | 6.029102000 | 2.610997000 |
| C  | 7.154359000  | 4.299930000 | 5.587787000 |
| C  | 2.279925000  | 7.500362000 | 2.865114000 |
| C  | 7.690436000  | 4.465066000 | 2.201990000 |
| C  | 7.117478000  | 6.797004000 | 5.111981000 |

|   |              |              |              |
|---|--------------|--------------|--------------|
| C | 3.071754000  | 6.366351000  | 3.132771000  |
| C | 1.500337000  | 1.493242000  | 1.588117000  |
| C | 0.908976000  | 7.313725000  | 2.593950000  |
| C | 5.514726000  | 4.685143000  | 0.923188000  |
| C | 2.551735000  | 5.049073000  | 3.087509000  |
| C | 1.986052000  | 0.035047000  | 1.696340000  |
| C | 0.763602000  | 2.499626000  | 5.848826000  |
| C | 6.377940000  | 5.261378000  | 2.071176000  |
| C | 1.568107000  | 0.230783000  | 5.064525000  |
| C | 1.155480000  | 4.921150000  | 2.884100000  |
| C | 6.271506000  | 5.515074000  | 5.230957000  |
| C | 5.190438000  | 5.714369000  | 6.319674000  |
| C | 0.762175000  | 1.489363000  | 4.676456000  |
| C | 2.405110000  | 2.300159000  | 0.625959000  |
| H | -0.649517000 | 0.953471000  | 1.658025000  |
| H | -0.317783000 | 2.581526000  | 0.983883000  |
| H | 0.057919000  | 1.110658000  | 0.025511000  |
| H | -1.253020000 | 2.001193000  | 3.945385000  |
| H | -0.744449000 | 0.314423000  | 3.572402000  |
| H | -1.199068000 | 0.760407000  | 5.240049000  |
| H | 5.755673000  | 7.325412000  | 1.605689000  |
| H | 7.294380000  | 7.233854000  | 2.518683000  |
| H | 7.256319000  | 6.766979000  | 0.794941000  |
| H | -0.746513000 | 5.881886000  | 2.438002000  |
| H | 6.576126000  | 3.357275000  | 5.559643000  |
| H | 8.019440000  | 4.195089000  | 4.909054000  |
| H | 7.543850000  | 4.427389000  | 6.618592000  |
| H | 2.730037000  | 8.502620000  | 2.890226000  |
| H | 7.523988000  | 3.424179000  | 2.533776000  |
| H | 8.182267000  | 4.422330000  | 1.207899000  |
| H | 8.396692000  | 4.950499000  | 2.901214000  |
| H | 7.965927000  | 6.670604000  | 4.414497000  |
| H | 6.506242000  | 7.659036000  | 4.783606000  |
| H | 7.540875000  | 7.037063000  | 6.109503000  |
| H | 5.351759000  | 3.598989000  | 1.037906000  |
| H | 4.525801000  | 5.178886000  | 0.862823000  |
| H | 6.043501000  | 4.850285000  | -0.038180000 |
| H | 1.257821000  | -0.595026000 | 2.240191000  |
| H | 2.099935000  | -0.384348000 | 0.676138000  |
| H | 2.969408000  | -0.041448000 | 2.196929000  |
| H | 0.241173000  | 3.437088000  | 5.578217000  |
| H | 0.241715000  | 2.041615000  | 6.713573000  |
| H | 1.791787000  | 2.744371000  | 6.171949000  |
| H | 2.651963000  | 0.443225000  | 5.127396000  |
| H | 1.239966000  | -0.116137000 | 6.065068000  |
| H | 1.415159000  | -0.596023000 | 4.348373000  |
| H | 4.589066000  | 4.798315000  | 6.468758000  |
| H | 5.692797000  | 5.949897000  | 7.280279000  |
| H | 4.508688000  | 6.548447000  | 6.066889000  |
| H | 2.113035000  | 3.367253000  | 0.588517000  |
| H | 3.468340000  | 2.238983000  | 0.916512000  |
| H | 2.312648000  | 1.876244000  | -0.394746000 |

|   |              |              |              |
|---|--------------|--------------|--------------|
| I | 4.550895000  | 1.676511000  | 7.133671000  |
| F | 1.729453000  | -0.282393000 | 11.357917000 |
| F | 3.884085000  | -0.281178000 | 13.059720000 |
| F | 2.016754000  | 0.570054000  | 8.781684000  |
| F | 6.339813000  | 0.574208000  | 12.179643000 |
| F | 6.650453000  | 1.431248000  | 9.605843000  |
| C | 2.927336000  | 0.136666000  | 10.920588000 |
| C | 3.090381000  | 0.579686000  | 9.594229000  |
| C | 4.343912000  | 1.019652000  | 9.127081000  |
| C | 5.438245000  | 1.016274000  | 10.012012000 |
| C | 5.291365000  | 0.575920000  | 11.341683000 |
| C | 4.031696000  | 0.137649000  | 11.795711000 |
| H | 4.461800000  | 2.241123000  | 4.633286000  |
| H | 3.201759000  | 3.896037000  | 5.059096000  |
| C | 6.741423000  | 0.554569000  | 1.090444000  |
| C | 6.097613000  | 0.113616000  | -0.073593000 |
| C | 8.139989000  | 0.657656000  | 1.085153000  |
| C | 6.826742000  | -0.237036000 | -1.226294000 |
| C | 8.896321000  | 0.314309000  | -0.051844000 |
| C | 8.231671000  | -0.127999000 | -1.213393000 |
| I | 5.590152000  | 1.276178000  | 2.836182000  |
| F | 4.750444000  | 0.005679000  | -0.121371000 |
| F | 6.201899000  | -0.666515000 | -2.336942000 |
| F | 8.938430000  | -0.453016000 | -2.306304000 |
| F | 10.237642000 | 0.409010000  | -0.047302000 |
| F | 8.804118000  | 1.086423000  | 2.182374000  |
| H | 0.275854000  | 8.189336000  | 2.384991000  |

80

(p-H-POCOP)IrH(IC6F5)H NS-bound-d, E = -2824.459961

|    |              |              |             |
|----|--------------|--------------|-------------|
| Ir | 3.514189000  | 3.971147000  | 4.156844000 |
| P  | 1.699576000  | 2.671501000  | 3.553440000 |
| P  | 4.837738000  | 5.845506000  | 4.502309000 |
| O  | 0.899822000  | 3.632201000  | 2.381499000 |
| C  | 0.742818000  | 0.817624000  | 1.572008000 |
| O  | 4.086257000  | 7.052831000  | 3.547614000 |
| C  | -0.916802000 | 1.720917000  | 4.331660000 |
| C  | 7.076071000  | 7.424004000  | 3.578070000 |
| C  | 0.615205000  | 5.861298000  | 1.511578000 |
| C  | 5.018016000  | 5.608802000  | 7.301012000 |
| C  | 2.233996000  | 7.602942000  | 2.109672000 |
| C  | 7.557019000  | 5.196510000  | 4.718934000 |
| C  | 5.595385000  | 7.899707000  | 6.404664000 |
| C  | 2.922942000  | 6.663430000  | 2.902122000 |
| H  | 0.527162000  | 7.913935000  | 0.799084000 |
| C  | 1.907653000  | 1.062274000  | 2.554786000 |
| C  | 1.075827000  | 7.190344000  | 1.420624000 |
| C  | 6.542873000  | 5.288872000  | 2.402582000 |
| C  | 2.480176000  | 5.328180000  | 3.044108000 |
| C  | 2.059450000  | -0.115334000 | 3.538824000 |
| C  | -0.159154000 | 3.964220000  | 5.143291000 |
| C  | 6.599776000  | 5.969563000  | 3.789352000 |
| C  | 0.873270000  | 1.888015000  | 6.129146000 |

|   |              |              |             |
|---|--------------|--------------|-------------|
| C | 1.329237000  | 4.950031000  | 2.314019000 |
| C | 4.693871000  | 6.664343000  | 6.222935000 |
| C | 3.217987000  | 7.106606000  | 6.360889000 |
| C | 0.299383000  | 2.516984000  | 4.842379000 |
| C | 3.209214000  | 1.213463000  | 1.736034000 |
| H | -0.218544000 | 0.635816000  | 2.080625000 |
| H | 0.617920000  | 1.672862000  | 0.882632000 |
| H | 0.979364000  | -0.083249000 | 0.967639000 |
| H | -1.300239000 | 2.137009000  | 3.380626000 |
| H | -0.696604000 | 0.646751000  | 4.191737000 |
| H | -1.729744000 | 1.795171000  | 5.084149000 |
| H | 6.314584000  | 8.019825000  | 3.040836000 |
| H | 7.330599000  | 7.937185000  | 4.519273000 |
| H | 7.994096000  | 7.401133000  | 2.954507000 |
| H | -0.280274000 | 5.523280000  | 0.971164000 |
| H | 4.279949000  | 4.784321000  | 7.275003000 |
| H | 6.034779000  | 5.184794000  | 7.191494000 |
| H | 4.957120000  | 6.083119000  | 8.302580000 |
| H | 2.612634000  | 8.632182000  | 2.035222000 |
| H | 7.206116000  | 4.161678000  | 4.894659000 |
| H | 8.557338000  | 5.133818000  | 4.241796000 |
| H | 7.684000000  | 5.699249000  | 5.696819000 |
| H | 6.668416000  | 7.635704000  | 6.440622000 |
| H | 5.433186000  | 8.645913000  | 5.604641000 |
| H | 5.340806000  | 8.381221000  | 7.372149000 |
| H | 6.232188000  | 4.233613000  | 2.474916000 |
| H | 5.830441000  | 5.808358000  | 1.732123000 |
| H | 7.552075000  | 5.339962000  | 1.943572000 |
| H | 1.104413000  | -0.380358000 | 4.028020000 |
| H | 2.414013000  | -1.010828000 | 2.987507000 |
| H | 2.798975000  | 0.101198000  | 4.329869000 |
| H | -0.665927000 | 4.418262000  | 4.271660000 |
| H | -0.877923000 | 3.936742000  | 5.988213000 |
| H | 0.695393000  | 4.605714000  | 5.430382000 |
| H | 1.708371000  | 2.499655000  | 6.520830000 |
| H | 0.076735000  | 1.857555000  | 6.901645000 |
| H | 1.234451000  | 0.854122000  | 5.977423000 |
| H | 2.526619000  | 6.267774000  | 6.152887000 |
| H | 3.047868000  | 7.453043000  | 7.401361000 |
| H | 2.982775000  | 7.938825000  | 5.671819000 |
| H | 3.161198000  | 2.085714000  | 1.056659000 |
| H | 4.088961000  | 1.350511000  | 2.388140000 |
| H | 3.352748000  | 0.297769000  | 1.125230000 |
| I | 4.837578000  | 2.251636000  | 5.736288000 |
| F | 5.226241000  | -3.020869000 | 4.402075000 |
| F | 6.944142000  | -2.574764000 | 2.307917000 |
| F | 4.375986000  | -0.933055000 | 5.941578000 |
| F | 7.813176000  | -0.032382000 | 1.749308000 |
| F | 6.979093000  | 2.064119000  | 3.278163000 |
| C | 5.649765000  | -1.776534000 | 4.136709000 |
| C | 5.226497000  | -0.691468000 | 4.926193000 |
| C | 5.644595000  | 0.619509000  | 4.637426000 |

|   |             |              |             |
|---|-------------|--------------|-------------|
| C | 6.537707000 | 0.831361000  | 3.572927000 |
| C | 6.971438000 | -0.241791000 | 2.771219000 |
| C | 6.530641000 | -1.548680000 | 3.060487000 |
| H | 4.264036000 | 3.651036000  | 2.718834000 |
| H | 2.713253000 | 4.317700000  | 5.596351000 |

80

(p-H-POCOP)IrH(IC6F5)H NS-bound-e, E = -2824.457898

|    |              |              |             |
|----|--------------|--------------|-------------|
| Ir | 3.834630000  | 4.127066000  | 3.053875000 |
| P  | 1.996368000  | 2.761780000  | 2.691682000 |
| P  | 4.811153000  | 6.045350000  | 3.919978000 |
| O  | 0.939966000  | 3.775072000  | 1.755726000 |
| C  | 0.664493000  | 0.950932000  | 0.887183000 |
| O  | 3.767961000  | 7.322302000  | 3.384220000 |
| C  | -0.401293000 | 1.713885000  | 3.953161000 |
| C  | 6.488267000  | 8.351986000  | 3.448561000 |
| C  | 0.185044000  | 6.074324000  | 1.554843000 |
| C  | 5.301871000  | 5.089240000  | 6.556292000 |
| C  | 1.621701000  | 7.884488000  | 2.413753000 |
| C  | 7.601246000  | 6.251685000  | 4.388353000 |
| C  | 5.022189000  | 7.610971000  | 6.339997000 |
| C  | 2.571684000  | 6.916826000  | 2.806367000 |
| H  | -0.302253000 | 8.189067000  | 1.454167000 |
| C  | 1.977580000  | 1.137216000  | 1.675767000 |
| C  | 0.435686000  | 7.444259000  | 1.788809000 |
| C  | 6.848996000  | 6.338792000  | 2.021527000 |
| C  | 2.349347000  | 5.539267000  | 2.604634000 |
| C  | 2.253585000  | -0.041453000 | 2.637299000 |
| C  | 0.410549000  | 3.930598000  | 4.694048000 |
| C  | 6.510657000  | 6.808571000  | 3.448701000 |
| C  | 1.695538000  | 1.877613000  | 5.382212000 |
| C  | 1.153911000  | 5.139563000  | 1.968491000 |
| C  | 4.570285000  | 6.231681000  | 5.818370000 |
| C  | 3.057932000  | 6.105524000  | 6.102192000 |
| C  | 0.878308000  | 2.526203000  | 4.244285000 |
| C  | 3.149208000  | 1.168784000  | 0.673976000 |
| H  | -0.218597000 | 0.832443000  | 1.536374000 |
| H  | 0.490158000  | 1.807594000  | 0.210569000 |
| H  | 0.754010000  | 0.033877000  | 0.267373000 |
| H  | -0.968079000 | 2.154311000  | 3.111194000 |
| H  | -0.212399000 | 0.647398000  | 3.739993000 |
| H  | -1.050793000 | 1.757976000  | 4.852449000 |
| H  | 5.714262000  | 8.733147000  | 2.757350000 |
| H  | 6.306768000  | 8.785718000  | 4.445473000 |
| H  | 7.477460000  | 8.714854000  | 3.097602000 |
| H  | -0.735589000 | 5.738487000  | 1.057044000 |
| H  | 5.007772000  | 4.101080000  | 6.152051000 |
| H  | 6.400828000  | 5.172789000  | 6.496062000 |
| H  | 5.020456000  | 5.119387000  | 7.629857000 |
| H  | 1.819922000  | 8.953821000  | 2.570945000 |
| H  | 7.574894000  | 5.144105000  | 4.427593000 |
| H  | 8.593716000  | 6.547180000  | 3.988898000 |
| H  | 7.529314000  | 6.644680000  | 5.417666000 |

|   |              |              |              |
|---|--------------|--------------|--------------|
| H | 6.113704000  | 7.763357000  | 6.275702000  |
| H | 4.512098000  | 8.429653000  | 5.797604000  |
| H | 4.743096000  | 7.689908000  | 7.411474000  |
| H | 6.915965000  | 5.235730000  | 1.967529000  |
| H | 6.102699000  | 6.687152000  | 1.288106000  |
| H | 7.835725000  | 6.757621000  | 1.733122000  |
| H | 1.427464000  | -0.241504000 | 3.340197000  |
| H | 2.401115000  | -0.957814000 | 2.029410000  |
| H | 3.183521000  | 0.124115000  | 3.217728000  |
| H | -0.336117000 | 4.351965000  | 3.996995000  |
| H | -0.064734000 | 3.836797000  | 5.692191000  |
| H | 1.242093000  | 4.647339000  | 4.765602000  |
| H | 2.581113000  | 2.489177000  | 5.641006000  |
| H | 1.055597000  | 1.805950000  | 6.286370000  |
| H | 2.046241000  | 0.859981000  | 5.135707000  |
| H | 2.690589000  | 5.091438000  | 5.876300000  |
| H | 2.885308000  | 6.294465000  | 7.181732000  |
| H | 2.458526000  | 6.833125000  | 5.524445000  |
| H | 3.004107000  | 1.934247000  | -0.103556000 |
| H | 4.112567000  | 1.355208000  | 1.185907000  |
| H | 3.206267000  | 0.180638000  | 0.171744000  |
| I | 4.576823000  | 4.324652000  | 0.350439000  |
| F | -0.081278000 | 5.054128000  | -2.388458000 |
| F | -0.072726000 | 7.777038000  | -2.026406000 |
| F | 1.962132000  | 3.542203000  | -1.431352000 |
| F | 2.013819000  | 8.989610000  | -0.727176000 |
| F | 4.088060000  | 7.506556000  | 0.215489000  |
| C | 0.947691000  | 5.644896000  | -1.760176000 |
| C | 2.009269000  | 4.874479000  | -1.252927000 |
| C | 3.073332000  | 5.482069000  | -0.562282000 |
| C | 3.080355000  | 6.881202000  | -0.414364000 |
| C | 2.023029000  | 7.661929000  | -0.911716000 |
| C | 0.954380000  | 7.040610000  | -1.583121000 |
| H | 5.038417000  | 2.993266000  | 3.319866000  |
| H | 3.547450000  | 3.840816000  | 4.562010000  |

74

(p-MeOOC-POCOP)IrH<sub>2</sub> S tol, E = -2027.284304

|    |              |              |              |
|----|--------------|--------------|--------------|
| C  | -0.351751000 | 1.197573000  | -3.616989000 |
| C  | -0.229320000 | 1.189450000  | -2.215661000 |
| C  | -0.172221000 | -0.023787000 | -1.482066000 |
| C  | -0.240645000 | -1.245804000 | -2.199206000 |
| C  | -0.361505000 | -1.275335000 | -3.601736000 |
| C  | -0.416475000 | -0.042432000 | -4.297640000 |
| H  | -0.396914000 | 2.135204000  | -4.185369000 |
| H  | -0.412026000 | -2.228113000 | -4.141599000 |
| O  | -0.187438000 | -2.435064000 | -1.506235000 |
| O  | -0.161885000 | 2.387078000  | -1.539304000 |
| P  | -0.029280000 | -2.267353000 | 0.222427000  |
| P  | -0.018154000 | 2.241703000  | 0.192140000  |
| Ir | 0.006023000  | -0.010704000 | 0.591128000  |
| H  | 0.921545000  | 0.015914000  | 1.909394000  |
| H  | -0.639186000 | -0.016429000 | 2.064358000  |

|   |              |              |              |
|---|--------------|--------------|--------------|
| C | 1.601313000  | -3.200210000 | 0.461748000  |
| C | -1.579548000 | -3.228321000 | 0.734585000  |
| C | 1.600842000  | 3.199269000  | 0.415696000  |
| C | -1.581350000 | 3.184080000  | 0.696449000  |
| C | 1.985590000  | -3.135669000 | 1.955549000  |
| H | 3.004325000  | -3.557843000 | 2.082715000  |
| H | 1.994184000  | -2.090506000 | 2.320569000  |
| H | 1.297580000  | -3.722438000 | 2.592210000  |
| C | -1.517010000 | -3.485943000 | 2.253693000  |
| H | -1.274531000 | -2.560699000 | 2.813739000  |
| H | -2.506834000 | -3.847950000 | 2.601958000  |
| H | -0.769295000 | -4.260922000 | 2.509572000  |
| C | 2.630240000  | -2.390100000 | -0.365071000 |
| H | 2.405774000  | -2.434701000 | -1.447627000 |
| H | 2.638889000  | -1.325551000 | -0.056532000 |
| H | 3.640987000  | -2.817545000 | -0.199718000 |
| C | 1.563100000  | -4.656040000 | -0.035927000 |
| H | 2.595922000  | -5.063799000 | -0.035454000 |
| H | 0.952943000  | -5.301437000 | 0.623100000  |
| H | 1.169576000  | -4.723568000 | -1.067949000 |
| C | -1.786621000 | -4.540731000 | -0.046007000 |
| H | -1.050235000 | -5.315976000 | 0.228551000  |
| H | -2.795507000 | -4.939266000 | 0.191066000  |
| H | -1.731330000 | -4.370733000 | -1.137447000 |
| C | -2.744688000 | -2.259019000 | 0.414080000  |
| H | -2.634996000 | -1.303967000 | 0.964144000  |
| H | -2.789548000 | -2.026574000 | -0.667702000 |
| H | -3.703153000 | -2.736704000 | 0.706616000  |
| C | 1.814468000  | 3.457866000  | 1.920842000  |
| H | 1.676568000  | 2.533171000  | 2.516114000  |
| H | 2.851243000  | 3.819278000  | 2.083771000  |
| H | 1.126232000  | 4.233580000  | 2.307512000  |
| C | -1.693218000 | 3.156450000  | 2.235747000  |
| H | -2.675514000 | 3.580156000  | 2.532009000  |
| H | -1.630419000 | 2.120747000  | 2.622082000  |
| H | -0.906419000 | 3.760588000  | 2.724698000  |
| C | 2.687142000  | 2.227132000  | -0.108671000 |
| H | 2.676101000  | 1.272467000  | 0.452658000  |
| H | 2.536489000  | 1.994662000  | -1.180786000 |
| H | 3.683422000  | 2.703020000  | 0.006685000  |
| C | 1.665937000  | 4.510360000  | -0.391221000 |
| H | 0.995281000  | 5.288380000  | 0.013185000  |
| H | 2.702592000  | 4.905192000  | -0.343668000 |
| H | 1.410897000  | 4.340257000  | -1.453878000 |
| C | -1.637485000 | 4.626873000  | 0.163409000  |
| H | -2.656609000 | 5.033551000  | 0.333611000  |
| H | -0.925569000 | 5.289935000  | 0.689183000  |
| H | -1.430099000 | 4.667935000  | -0.922730000 |
| C | -2.738275000 | 2.355146000  | 0.085253000  |
| H | -2.708099000 | 2.371047000  | -1.020727000 |
| H | -2.690254000 | 1.298967000  | 0.418178000  |
| H | -3.705023000 | 2.789318000  | 0.414710000  |



|   |              |              |              |
|---|--------------|--------------|--------------|
| C | -0.545571000 | 0.008182000  | -5.790422000 |
| O | -0.597407000 | 1.037883000  | -6.453359000 |
| O | -0.600586000 | -1.232761000 | -6.348296000 |
| C | -0.724476000 | -1.265103000 | -7.781865000 |
| H | -1.652395000 | -0.753559000 | -8.108187000 |
| H | 0.140947000  | -0.766298000 | -8.262949000 |
| H | -0.755922000 | -2.333841000 | -8.059170000 |

74

(p-MeOOC-POCOP)IrH<sub>2</sub> NS toI, E = -2027.285792

|    |              |              |              |
|----|--------------|--------------|--------------|
| Ir | 0.809718000  | -0.908441000 | -0.013975000 |
| P  | 2.288061000  | 0.839006000  | 0.028936000  |
| P  | -1.170816000 | -2.056040000 | 0.009170000  |
| O  | -2.890848000 | 5.214892000  | 0.083788000  |
| O  | -4.574447000 | 3.686257000  | 0.068962000  |
| O  | 1.299797000  | 2.261357000  | 0.057782000  |
| C  | 4.210671000  | 2.401959000  | 1.461341000  |
| O  | -2.397429000 | -0.832062000 | 0.023805000  |
| C  | 3.560743000  | 2.611018000  | -1.862644000 |
| C  | -3.061926000 | -3.666635000 | 1.431238000  |
| C  | -0.951036000 | 3.116698000  | 0.059457000  |
| C  | -0.933266000 | -4.282691000 | -1.678821000 |
| C  | -2.845667000 | 1.533351000  | 0.041823000  |
| C  | -0.584862000 | -4.081506000 | 1.835170000  |
| C  | -3.124954000 | -3.003473000 | -1.894664000 |
| C  | -1.925551000 | 0.471182000  | 0.030004000  |
| C  | -3.256963000 | 4.043700000  | 0.070889000  |
| C  | 3.327363000  | 1.145525000  | 1.575694000  |
| C  | -2.345629000 | 2.860856000  | 0.056316000  |
| C  | -1.683534000 | -1.978993000 | 2.700579000  |
| C  | -0.523611000 | 0.684556000  | 0.029536000  |
| C  | 4.181523000  | -0.112865000 | 1.842341000  |
| C  | -5.512022000 | 4.776370000  | 0.084347000  |
| C  | 2.159890000  | 0.678049000  | -2.666827000 |
| C  | -1.670027000 | -3.019504000 | 1.554951000  |
| C  | 4.435553000  | 0.226856000  | -1.666032000 |
| C  | -0.065908000 | 2.026952000  | 0.047421000  |
| C  | -1.611635000 | -2.899394000 | -1.628228000 |
| C  | -0.969805000 | -1.965604000 | -2.685134000 |
| C  | 3.193243000  | 1.137369000  | -1.607404000 |
| C  | 2.307148000  | 1.332315000  | 2.724382000  |
| H  | 5.023429000  | 2.269630000  | 0.722642000  |
| H  | 3.615185000  | 3.292592000  | 1.183714000  |
| H  | 4.684284000  | 2.600402000  | 2.445657000  |
| H  | 2.677284000  | 3.267447000  | -1.756081000 |
| H  | 4.350485000  | 2.972634000  | -1.181120000 |
| H  | 3.943052000  | 2.707624000  | -2.900743000 |
| H  | -3.830686000 | -2.923243000 | 1.146032000  |
| H  | -3.070486000 | -4.491333000 | 0.694127000  |
| H  | -3.348815000 | -4.095542000 | 2.414258000  |
| H  | -0.587258000 | 4.152198000  | 0.074176000  |
| H  | 0.141120000  | -4.217208000 | -1.414421000 |
| H  | -1.422550000 | -5.006309000 | -0.999068000 |

|   |              |              |              |
|---|--------------|--------------|--------------|
| H | -1.009369000 | -4.687262000 | -2.709747000 |
| H | -3.925186000 | 1.340822000  | 0.043155000  |
| H | 0.417426000  | -3.618117000 | 1.912557000  |
| H | -0.815382000 | -4.585404000 | 2.796938000  |
| H | -0.544210000 | -4.857958000 | 1.048921000  |
| H | -3.624293000 | -3.716425000 | -1.215403000 |
| H | -3.617224000 | -2.018427000 | -1.793633000 |
| H | -3.279456000 | -3.364879000 | -2.933264000 |
| H | -0.710108000 | -1.459270000 | 2.792037000  |
| H | -2.469106000 | -1.216122000 | 2.545454000  |
| H | -1.887036000 | -2.504118000 | 3.656617000  |
| H | 4.939383000  | -0.279900000 | 1.054625000  |
| H | 4.717295000  | 0.014659000  | 2.806056000  |
| H | 3.549182000  | -1.018988000 | 1.908640000  |
| H | -6.515379000 | 4.313997000  | 0.076890000  |
| H | -5.380795000 | 5.397743000  | 0.993391000  |
| H | -5.379392000 | 5.424486000  | -0.805576000 |
| H | 1.225816000  | 1.270606000  | -2.613385000 |
| H | 2.589188000  | 0.800355000  | -3.683004000 |
| H | 1.908165000  | -0.396186000 | -2.535666000 |
| H | 4.181948000  | -0.821392000 | -1.410405000 |
| H | 4.847646000  | 0.239574000  | -2.696715000 |
| H | 5.233297000  | 0.575473000  | -0.982712000 |
| H | 0.130631000  | -1.905405000 | -2.544592000 |
| H | -1.157127000 | -2.369504000 | -3.701800000 |
| H | -1.390243000 | -0.942093000 | -2.637912000 |
| H | 1.693955000  | 2.240824000  | 2.577059000  |
| H | 1.625068000  | 0.464233000  | 2.809602000  |
| H | 2.861065000  | 1.432672000  | 3.680526000  |
| H | 1.027747000  | -1.179309000 | 1.485534000  |
| H | 1.883806000  | -2.186913000 | -0.113098000 |

86

(p-MeOOC-POCOP)IrH<sub>2</sub>-IC<sub>6</sub>F<sub>5</sub> NS-bound-a1, E = -3052.123147

|    |              |             |             |
|----|--------------|-------------|-------------|
| Ir | 3.069198000  | 3.933005000 | 4.215248000 |
| P  | 1.139869000  | 2.891621000 | 3.539726000 |
| P  | 4.698917000  | 5.547641000 | 4.501817000 |
| O  | -0.684982000 | 8.525179000 | 0.254411000 |
| O  | 1.153248000  | 9.771355000 | 0.744818000 |
| O  | 0.323755000  | 4.076419000 | 2.587061000 |
| C  | -0.244063000 | 1.029521000 | 1.890229000 |
| O  | 4.138201000  | 6.867396000 | 3.534618000 |
| C  | -1.573376000 | 2.774635000 | 4.506730000 |
| C  | 7.011107000  | 6.775175000 | 3.357237000 |
| C  | 0.390095000  | 6.319117000 | 1.715489000 |
| C  | 5.049835000  | 5.309931000 | 7.274273000 |
| C  | 2.340489000  | 7.749384000 | 2.202892000 |
| C  | 7.383327000  | 4.741950000 | 4.825415000 |
| C  | 5.488438000  | 7.631227000 | 6.323158000 |
| C  | 2.906919000  | 6.688798000 | 2.930078000 |
| C  | 0.407991000  | 8.630585000 | 0.801441000 |
| C  | 1.173831000  | 1.469587000 | 2.302286000 |
| C  | 1.075810000  | 7.553308000 | 1.592893000 |

|   |              |              |              |
|---|--------------|--------------|--------------|
| C | 6.321050000  | 4.501160000  | 2.539405000  |
| C | 2.255432000  | 5.437959000  | 3.070987000  |
| C | 1.968760000  | 0.295111000  | 2.908092000  |
| C | 0.574336000  | 10.854248000 | -0.004703000 |
| C | 0.220977000  | 3.912156000  | 5.864265000  |
| C | 6.451160000  | 5.402704000  | 3.789999000  |
| C | 0.195314000  | 1.390525000  | 5.710457000  |
| C | 0.988361000  | 5.285412000  | 2.452053000  |
| C | 4.635925000  | 6.355021000  | 6.215098000  |
| C | 3.142455000  | 6.711536000  | 6.414425000  |
| C | -0.101824000 | 2.700223000  | 4.953652000  |
| C | 1.929245000  | 2.020783000  | 1.069113000  |
| H | -0.776334000 | 0.527925000  | 2.719988000  |
| H | -0.850867000 | 1.886011000  | 1.539618000  |
| H | -0.164463000 | 0.300881000  | 1.056738000  |
| H | -1.767139000 | 3.689376000  | 3.916308000  |
| H | -1.874157000 | 1.898736000  | 3.905441000  |
| H | -2.218209000 | 2.800130000  | 5.410195000  |
| H | 6.372414000  | 7.248877000  | 2.589992000  |
| H | 7.120123000  | 7.476666000  | 4.202665000  |
| H | 8.018970000  | 6.612013000  | 2.921740000  |
| H | -0.589874000 | 6.189150000  | 1.238638000  |
| H | 4.470553000  | 4.372599000  | 7.160910000  |
| H | 6.124225000  | 5.059282000  | 7.221612000  |
| H | 4.848562000  | 5.724889000  | 8.283902000  |
| H | 2.866147000  | 8.707270000  | 2.111174000  |
| H | 6.952276000  | 3.810509000  | 5.237915000  |
| H | 8.335781000  | 4.469353000  | 4.326775000  |
| H | 7.622434000  | 5.429845000  | 5.658030000  |
| H | 6.571303000  | 7.410504000  | 6.279193000  |
| H | 5.236867000  | 8.353111000  | 5.522938000  |
| H | 5.287469000  | 8.118287000  | 7.300540000  |
| H | 6.038908000  | 3.467811000  | 2.812386000  |
| H | 5.573043000  | 4.900526000  | 1.826288000  |
| H | 7.302748000  | 4.461755000  | 2.023967000  |
| H | 1.459085000  | -0.156563000 | 3.778412000  |
| H | 2.081772000  | -0.493981000 | 2.136110000  |
| H | 2.980118000  | 0.611677000  | 3.226189000  |
| H | 1.302672000  | 11.683125000 | 0.048259000  |
| H | 0.403622000  | 10.557045000 | -1.059136000 |
| H | -0.395401000 | 11.164058000 | 0.434748000  |
| H | 0.079858000  | 4.875143000  | 5.336129000  |
| H | -0.448499000 | 3.903453000  | 6.749196000  |
| H | 1.266213000  | 3.855864000  | 6.242436000  |
| H | 1.272507000  | 1.294806000  | 5.953751000  |
| H | -0.372359000 | 1.387131000  | 6.664149000  |
| H | -0.118585000 | 0.501661000  | 5.131230000  |
| H | 2.495141000  | 5.813517000  | 6.351332000  |
| H | 3.006845000  | 7.147250000  | 7.425598000  |
| H | 2.787360000  | 7.446042000  | 5.667667000  |
| H | 1.390885000  | 2.867906000  | 0.604476000  |
| H | 2.950241000  | 2.357855000  | 1.333500000  |

|   |             |             |            |
|---|-------------|-------------|------------|
| H | 2.02070000  | 1.20918200  | 0.31847200 |
| I | 5.36602100  | 1.29798200  | 4.95051500 |
| F | 8.04485300  | -3.45450300 | 5.77596800 |
| F | 10.31216900 | -2.62279800 | 4.46920500 |
| F | 5.89715400  | -1.77980000 | 5.99418800 |
| F | 10.43571400 | -0.10530500 | 3.37826300 |
| F | 8.30006600  | 1.58377900  | 3.58339700 |
| C | 8.09603100  | -2.22038000 | 5.24519600 |
| C | 6.99759700  | -1.34461300 | 5.34802600 |
| C | 7.04113600  | -0.05295500 | 4.79806500 |
| C | 8.21014800  | 0.35270100  | 4.13181300 |
| C | 9.32147200  | -0.50422900 | 4.01648100 |
| C | 9.26026600  | -1.79659400 | 4.57442200 |
| H | 3.84837200  | 3.33444000  | 3.03395800 |
| H | 3.56498500  | 2.73800600  | 5.31888400 |

86

(p-MeOOC-POCOP)IrH<sub>2</sub>-IC<sub>6</sub>F<sub>5</sub> NS-bound-a<sub>2</sub>, E = -3052.122851

|    |             |             |            |
|----|-------------|-------------|------------|
| Ir | 2.61402300  | 4.21723800  | 4.58449800 |
| P  | 1.29484900  | 2.33673000  | 4.49741100 |
| P  | 3.45559000  | 6.29707600  | 4.12338300 |
| O  | -0.01833200 | 2.79044200  | 3.46325200 |
| C  | 0.85584500  | -0.31909300 | 3.54195200 |
| O  | 2.34018600  | 6.97299800  | 2.99068300 |
| C  | -1.03137700 | 1.29515300  | 5.84775800 |
| C  | 5.45714300  | 7.90914900  | 2.87618700 |
| C  | -0.92819300 | 4.49779300  | 2.03068500 |
| C  | 4.43796200  | 7.35294900  | 6.52029800 |
| C  | 0.28041300  | 6.63726200  | 1.78919300 |
| C  | 6.16801500  | 5.69986600  | 3.92062700 |
| C  | 3.11887400  | 8.99467200  | 5.08196500 |
| C  | 1.26568600  | 6.15899800  | 2.66678200 |
| C  | 1.90596400  | 0.80724300  | 3.57171700 |
| C  | -0.81638300 | 5.79686700  | 1.47318900 |
| C  | 4.79355400  | 5.72513600  | 1.80104700 |
| C  | 1.19430200  | 4.86273800  | 3.23976300 |
| C  | 3.21904500  | 0.32616000  | 4.22215400 |
| C  | 0.09717900  | 3.38980000  | 6.67928800 |
| C  | 5.06053100  | 6.44525600  | 3.14461200 |
| C  | 1.22282600  | 1.15404300  | 7.02972500 |
| C  | 0.07775900  | 4.05427800  | 2.90574700 |
| C  | 3.26038300  | 7.53159400  | 5.54110300 |
| C  | 1.94327500  | 7.07788900  | 6.22068600 |
| C  | 0.32864600  | 1.97854100  | 6.08252000 |
| C  | 2.19177700  | 1.28702000  | 2.12816300 |
| H  | 0.70318600  | -0.76756300 | 4.54148700 |
| H  | -0.11699800 | 0.04105000  | 3.15628000 |
| H  | 1.21418600  | -1.12442000 | 2.86721100 |
| H  | -1.64240900 | 1.85940400  | 5.11888900 |
| H  | -0.92408900 | 0.25734700  | 5.48728300 |
| H  | -1.58229200 | 1.26082600  | 6.81115700 |
| H  | 4.63234100  | 8.47371700  | 2.40076900 |
| H  | 5.76188000  | 8.43073700  | 3.80270000 |

|   |              |              |              |
|---|--------------|--------------|--------------|
| H | 6.325026000  | 7.924563000  | 2.184342000  |
| H | -1.780130000 | 3.852810000  | 1.784738000  |
| H | 4.586190000  | 6.287851000  | 6.789499000  |
| H | 5.383824000  | 7.747534000  | 6.102925000  |
| H | 4.222348000  | 7.915216000  | 7.452572000  |
| H | 0.343872000  | 7.640385000  | 1.348309000  |
| H | 5.884946000  | 4.648386000  | 4.118002000  |
| H | 7.095868000  | 5.703868000  | 3.311897000  |
| H | 6.398690000  | 6.178182000  | 4.890288000  |
| H | 4.056746000  | 9.395988000  | 4.659868000  |
| H | 2.318614000  | 9.100920000  | 4.325975000  |
| H | 2.851889000  | 9.618561000  | 5.960661000  |
| H | 4.467005000  | 4.678340000  | 1.955187000  |
| H | 4.018852000  | 6.246122000  | 1.208221000  |
| H | 5.734682000  | 5.709122000  | 1.213961000  |
| H | 3.085160000  | -0.004044000 | 5.268072000  |
| H | 3.611099000  | -0.535808000 | 3.643359000  |
| H | 3.986048000  | 1.122645000  | 4.217764000  |
| H | -0.478214000 | 4.037820000  | 5.989067000  |
| H | -0.474147000 | 3.303737000  | 7.626732000  |
| H | 1.063909000  | 3.884233000  | 6.913568000  |
| H | 2.230036000  | 1.604248000  | 7.136334000  |
| H | 0.754227000  | 1.122777000  | 8.035336000  |
| H | 1.338990000  | 0.110174000  | 6.681314000  |
| H | 2.030850000  | 6.039487000  | 6.606584000  |
| H | 1.726607000  | 7.737882000  | 7.085977000  |
| H | 1.082660000  | 7.127558000  | 5.525450000  |
| H | 1.265514000  | 1.601687000  | 1.612448000  |
| H | 2.903241000  | 2.135393000  | 2.111598000  |
| H | 2.642576000  | 0.448144000  | 1.559143000  |
| I | 5.349187000  | 2.520129000  | 6.674420000  |
| F | 7.648870000  | -2.329409000 | 7.792135000  |
| F | 9.700988000  | -1.259247000 | 9.270397000  |
| F | 5.769859000  | -0.695161000 | 6.671647000  |
| F | 9.875377000  | 1.457186000  | 9.631514000  |
| F | 8.006437000  | 3.109857000  | 8.519374000  |
| C | 7.726339000  | -0.998317000 | 7.963977000  |
| C | 6.766047000  | -0.140989000 | 7.393152000  |
| C | 6.838128000  | 1.252300000  | 7.566889000  |
| C | 7.895510000  | 1.780807000  | 8.326282000  |
| C | 8.867244000  | 0.942300000  | 8.906560000  |
| C | 8.780382000  | -0.451729000 | 8.722473000  |
| H | 3.617752000  | 3.572645000  | 3.612461000  |
| H | 3.705710000  | 3.823922000  | 5.811662000  |
| C | -1.844409000 | 6.340697000  | 0.534516000  |
| O | -1.807082000 | 7.454099000  | 0.020912000  |
| O | -2.853619000 | 5.454146000  | 0.298861000  |
| C | -3.881790000 | 5.908758000  | -0.598766000 |
| H | -4.375907000 | 6.819471000  | -0.203923000 |
| H | -3.459020000 | 6.142743000  | -1.596737000 |
| H | -4.607612000 | 5.079359000  | -0.673633000 |

(m-bis-CF3-POCOP)IrH2 S tol, E = -2473.009161

|    |              |              |              |
|----|--------------|--------------|--------------|
| C  | -0.334252000 | 1.216761000  | -3.591844000 |
| C  | -0.205102000 | 1.204237000  | -2.177083000 |
| C  | -0.159992000 | -0.010758000 | -1.455394000 |
| C  | -0.231994000 | -1.228837000 | -2.169679000 |
| C  | -0.334503000 | -1.247291000 | -3.586588000 |
| C  | -0.390196000 | -0.016709000 | -4.270083000 |
| H  | -0.479618000 | -0.019012000 | -5.363232000 |
| O  | -0.199659000 | -2.408203000 | -1.491744000 |
| O  | -0.125914000 | 2.386535000  | -1.508034000 |
| P  | -0.031724000 | -2.262363000 | 0.246472000  |
| P  | -0.011515000 | 2.248240000  | 0.234990000  |
| Ir | 0.008678000  | -0.006273000 | 0.621533000  |
| H  | 0.914481000  | 0.009581000  | 1.944906000  |
| H  | -0.648564000 | -0.014568000 | 2.086821000  |
| C  | 1.598972000  | -3.203507000 | 0.431378000  |
| C  | -1.585373000 | -3.228919000 | 0.730010000  |
| C  | 1.598414000  | 3.217372000  | 0.458799000  |
| C  | -1.592546000 | 3.189242000  | 0.675707000  |
| C  | 2.014738000  | -3.161454000 | 1.917309000  |
| H  | 3.026761000  | -3.605647000 | 2.018942000  |
| H  | 2.053070000  | -2.120450000 | 2.292530000  |
| H  | 1.327545000  | -3.740443000 | 2.562297000  |
| C  | -1.511352000 | -3.539863000 | 2.238644000  |
| H  | -1.268601000 | -2.634701000 | 2.830803000  |
| H  | -2.497695000 | -3.917127000 | 2.579974000  |
| H  | -0.759466000 | -4.321171000 | 2.461155000  |
| C  | 2.611514000  | -2.388909000 | -0.412069000 |
| H  | 2.370079000  | -2.438956000 | -1.490732000 |
| H  | 2.625210000  | -1.324119000 | -0.104112000 |
| H  | 3.625140000  | -2.814745000 | -0.262117000 |
| C  | 1.538009000  | -4.650057000 | -0.090869000 |
| H  | 2.567143000  | -5.066227000 | -0.110425000 |
| H  | 0.930223000  | -5.301352000 | 0.564447000  |
| H  | 1.132789000  | -4.692484000 | -1.119680000 |
| C  | -1.805267000 | -4.510370000 | -0.098606000 |
| H  | -1.068815000 | -5.297938000 | 0.137027000  |
| H  | -2.812356000 | -4.912800000 | 0.138877000  |
| H  | -1.764796000 | -4.300190000 | -1.183388000 |
| C  | -2.746238000 | -2.242331000 | 0.448849000  |
| H  | -2.629967000 | -1.305419000 | 1.027817000  |
| H  | -2.797809000 | -1.977993000 | -0.625370000 |
| H  | -3.704833000 | -2.724868000 | 0.732215000  |
| C  | 1.766850000  | 3.535020000  | 1.958443000  |
| H  | 1.622782000  | 2.632672000  | 2.586070000  |
| H  | 2.794720000  | 3.914132000  | 2.135764000  |
| H  | 1.059365000  | 4.317050000  | 2.294734000  |
| C  | -1.760905000 | 3.159219000  | 2.209790000  |
| H  | -2.746163000 | 3.598383000  | 2.470968000  |
| H  | -1.729913000 | 2.121579000  | 2.595010000  |
| H  | -0.982340000 | 3.748431000  | 2.729509000  |
| C  | 2.700360000  | 2.230177000  | -0.000731000 |

|   |              |              |              |
|---|--------------|--------------|--------------|
| H | 2.679609000  | 1.295961000  | 0.593526000  |
| H | 2.578984000  | 1.960736000  | -1.068058000 |
| H | 3.691340000  | 2.714700000  | 0.122689000  |
| C | 1.680579000  | 4.495225000  | -0.399731000 |
| H | 0.990000000  | 5.282962000  | -0.052332000 |
| H | 2.711969000  | 4.899790000  | -0.328235000 |
| H | 1.467280000  | 4.280207000  | -1.463133000 |
| C | -1.622753000 | 4.630964000  | 0.137594000  |
| H | -2.642674000 | 5.044770000  | 0.283266000  |
| H | -0.918182000 | 5.290072000  | 0.678042000  |
| H | -1.391766000 | 4.664067000  | -0.944072000 |
| C | -2.726380000 | 2.365392000  | 0.015272000  |
| H | -2.663139000 | 2.404881000  | -1.088693000 |
| H | -2.687387000 | 1.303647000  | 0.331469000  |
| H | -3.703443000 | 2.791666000  | 0.323291000  |
| C | -0.375467000 | -2.561251000 | -4.324911000 |
| F | -0.448893000 | -2.392630000 | -5.674171000 |
| F | 0.736314000  | -3.321261000 | -4.080808000 |
| F | -1.451000000 | -3.326000000 | -3.964029000 |
| C | -0.414450000 | 2.527694000  | -4.332319000 |
| F | 0.705162000  | 3.293670000  | -4.154293000 |
| F | -0.561500000 | 2.353697000  | -5.674826000 |
| F | -1.472016000 | 3.288913000  | -3.913462000 |

74

(m-bis-CF3-POCOP)IrH2 NS tol, E = -2473.010142

|    |              |              |              |
|----|--------------|--------------|--------------|
| C  | -0.116317000 | 1.231529000  | -3.611469000 |
| C  | -0.035188000 | 1.212813000  | -2.194390000 |
| C  | 0.004853000  | 0.000864000  | -1.469306000 |
| C  | -0.022129000 | -1.210320000 | -2.195747000 |
| C  | -0.103947000 | -1.228409000 | -3.612766000 |
| C  | -0.149375000 | 0.001726000  | -4.299404000 |
| H  | -0.217649000 | 0.001952000  | -5.393662000 |
| O  | 0.013856000  | -2.395286000 | -1.513317000 |
| O  | -0.011423000 | 2.397027000  | -1.510780000 |
| P  | 0.019652000  | -2.254084000 | 0.223857000  |
| P  | 0.008304000  | 2.254460000  | 0.227577000  |
| Ir | 0.071226000  | 0.001029000  | 0.616115000  |
| H  | 0.231195000  | -0.022551000 | 2.271915000  |
| H  | -1.385539000 | -0.000528000 | 1.118169000  |
| C  | 1.635343000  | -3.177495000 | 0.561432000  |
| C  | -1.558222000 | -3.224285000 | 0.586398000  |
| C  | 1.627584000  | 3.176748000  | 0.552458000  |
| C  | -1.566575000 | 3.225674000  | 0.598914000  |
| C  | 1.679847000  | -3.563660000 | 2.053230000  |
| H  | 2.701010000  | -3.917130000 | 2.306517000  |
| H  | 1.445617000  | -2.697706000 | 2.704389000  |
| H  | 0.974448000  | -4.384048000 | 2.286500000  |
| C  | -1.855609000 | -3.114723000 | 2.097196000  |
| H  | -1.906013000 | -2.057402000 | 2.421511000  |
| H  | -2.835568000 | -3.592006000 | 2.305847000  |
| H  | -1.092698000 | -3.627782000 | 2.712092000  |
| C  | 2.717162000  | -2.108370000 | 0.262988000  |

|   |              |              |              |
|---|--------------|--------------|--------------|
| H | 2.678247000  | -1.771638000 | -0.791487000 |
| H | 2.597857000  | -1.223843000 | 0.924367000  |
| H | 3.723141000  | -2.538028000 | 0.449914000  |
| C | 1.865259000  | -4.399205000 | -0.348947000 |
| H | 2.899797000  | -4.768888000 | -0.188035000 |
| H | 1.175141000  | -5.230060000 | -0.120517000 |
| H | 1.753481000  | -4.132743000 | -1.416094000 |
| C | -1.464288000 | -4.695075000 | 0.139509000  |
| H | -0.751150000 | -5.271248000 | 0.758272000  |
| H | -2.462134000 | -5.167962000 | 0.253390000  |
| H | -1.167789000 | -4.775152000 | -0.923728000 |
| C | -2.670414000 | -2.512010000 | -0.221974000 |
| H | -2.727163000 | -1.433197000 | 0.020729000  |
| H | -2.506256000 | -2.616208000 | -1.310684000 |
| H | -3.645228000 | -2.977324000 | 0.031112000  |
| C | 1.688994000  | 3.552511000  | 2.046328000  |
| H | 1.459082000  | 2.682740000  | 2.693970000  |
| H | 2.713655000  | 3.901768000  | 2.291240000  |
| H | 0.988266000  | 4.373192000  | 2.292360000  |
| C | -1.846788000 | 3.130487000  | 2.113874000  |
| H | -2.829241000 | 3.600213000  | 2.327897000  |
| H | -1.883145000 | 2.076354000  | 2.450594000  |
| H | -1.082600000 | 3.658222000  | 2.714556000  |
| C | 2.705391000  | 2.109066000  | 0.234642000  |
| H | 2.587180000  | 1.215978000  | 0.885085000  |
| H | 2.660651000  | 1.786267000  | -0.823847000 |
| H | 3.713264000  | 2.533544000  | 0.423165000  |
| C | 1.847905000  | 4.404690000  | -0.351797000 |
| H | 1.171305000  | 5.239686000  | -0.098939000 |
| H | 2.889383000  | 4.763389000  | -0.212081000 |
| H | 1.708996000  | 4.149529000  | -1.418518000 |
| C | -1.479057000 | 4.691913000  | 0.135860000  |
| H | -2.477580000 | 5.163435000  | 0.249368000  |
| H | -0.764528000 | 5.276139000  | 0.745325000  |
| H | -1.187373000 | 4.761653000  | -0.929391000 |
| C | -2.686969000 | 2.504145000  | -0.189674000 |
| H | -2.531560000 | 2.591832000  | -1.281173000 |
| H | -2.744533000 | 1.429276000  | 0.069640000  |
| H | -3.658594000 | 2.975579000  | 0.064399000  |
| C | -0.160455000 | -2.541498000 | -4.350439000 |
| F | -0.255760000 | -2.374043000 | -5.698595000 |
| F | 0.949289000  | -3.311357000 | -4.127682000 |
| F | -1.235520000 | -3.300483000 | -3.970736000 |
| C | -0.189032000 | 2.544725000  | -4.347567000 |
| F | 0.908939000  | 3.330009000  | -4.120516000 |
| F | -0.277973000 | 2.377878000  | -5.696249000 |
| F | -1.275937000 | 3.287696000  | -3.969868000 |

86

(m-bis-CF3-POCOP)IrH2-IC6F5 NS-bound-a1, E = -3497.846476

|    |             |             |             |
|----|-------------|-------------|-------------|
| Ir | 3.015458000 | 4.036956000 | 4.138399000 |
| P  | 1.088901000 | 3.003531000 | 3.449601000 |
| P  | 4.644804000 | 5.646063000 | 4.438260000 |



|   |              |              |             |
|---|--------------|--------------|-------------|
| O | 0.276228000  | 4.215842000  | 2.511147000 |
| C | -0.331834000 | 1.223785000  | 1.748252000 |
| O | 4.091086000  | 6.962474000  | 3.446354000 |
| C | -1.633244000 | 2.926317000  | 4.396429000 |
| C | 6.965198000  | 6.878387000  | 3.310510000 |
| C | 0.355136000  | 6.448125000  | 1.619045000 |
| C | 4.934831000  | 5.464701000  | 7.213511000 |
| C | 2.293438000  | 7.870345000  | 2.133030000 |
| C | 7.311385000  | 4.828524000  | 4.771731000 |
| C | 5.424740000  | 7.762709000  | 6.222701000 |
| C | 2.869724000  | 6.793645000  | 2.855436000 |
| H | 0.589627000  | 8.495810000  | 0.948065000 |
| C | 1.095794000  | 1.623609000  | 2.167905000 |
| C | 1.041843000  | 7.674391000  | 1.516061000 |
| C | 6.268207000  | 4.612644000  | 2.473941000 |
| C | 2.207426000  | 5.554054000  | 2.990997000 |
| C | 1.875607000  | 0.421527000  | 2.737774000 |
| C | 0.175632000  | 4.015552000  | 5.775527000 |
| C | 6.396387000  | 5.505472000  | 3.731211000 |
| C | 0.108638000  | 1.494313000  | 5.589460000 |
| C | 0.946082000  | 5.402812000  | 2.373990000 |
| C | 4.556276000  | 6.495946000  | 6.128016000 |
| C | 3.066149000  | 6.886420000  | 6.288204000 |
| C | -0.165360000 | 2.819302000  | 4.850378000 |
| C | 1.850132000  | 2.205851000  | 0.947689000 |
| H | -0.873514000 | 0.710835000  | 2.564737000 |
| H | -0.918657000 | 2.102980000  | 1.420441000 |
| H | -0.266904000 | 0.516444000  | 0.895477000 |
| H | -1.806753000 | 3.843771000  | 3.804463000 |
| H | -1.949813000 | 2.056145000  | 3.794982000 |
| H | -2.279656000 | 2.964146000  | 5.298228000 |
| H | 6.316671000  | 7.379016000  | 2.569345000 |
| H | 7.105541000  | 7.560500000  | 4.166666000 |
| H | 7.960291000  | 6.708102000  | 2.849399000 |
| H | 4.330617000  | 4.540967000  | 7.118723000 |
| H | 6.002426000  | 5.182911000  | 7.171655000 |
| H | 4.740936000  | 5.908223000  | 8.212210000 |
| H | 6.865487000  | 3.897773000  | 5.170640000 |
| H | 8.266736000  | 4.551366000  | 4.281766000 |
| H | 7.545653000  | 5.506829000  | 5.613616000 |
| H | 6.505217000  | 7.527514000  | 6.207364000 |
| H | 5.195882000  | 8.468552000  | 5.401740000 |
| H | 5.209246000  | 8.273707000  | 7.184540000 |
| H | 5.978206000  | 3.578859000  | 2.737290000 |
| H | 5.529361000  | 5.022402000  | 1.757268000 |
| H | 7.253692000  | 4.570458000  | 1.966262000 |
| H | 1.362502000  | -0.044222000 | 3.599058000 |
| H | 1.972755000  | -0.349142000 | 1.945447000 |
| H | 2.893233000  | 0.714347000  | 3.059252000 |
| H | 0.035080000  | 4.986561000  | 5.262190000 |
| H | -0.486100000 | 3.999349000  | 6.666009000 |
| H | 1.223896000  | 3.946671000  | 6.145136000 |

|   |              |              |             |
|---|--------------|--------------|-------------|
| H | 1.181877000  | 1.381647000  | 5.843254000 |
| H | -0.469959000 | 1.482144000  | 6.536331000 |
| H | -0.208907000 | 0.618921000  | 4.991865000 |
| H | 2.395880000  | 6.007644000  | 6.199593000 |
| H | 2.915364000  | 7.318473000  | 7.298621000 |
| H | 2.755716000  | 7.638528000  | 5.539228000 |
| H | 1.305679000  | 3.059739000  | 0.502891000 |
| H | 2.870932000  | 2.539716000  | 1.217007000 |
| H | 1.942001000  | 1.411380000  | 0.179100000 |
| I | 5.304141000  | 1.339661000  | 4.802386000 |
| F | 7.801003000  | -3.543080000 | 5.308154000 |
| F | 10.160960000 | -2.661379000 | 4.215862000 |
| F | 5.689085000  | -1.830720000 | 5.570963000 |
| F | 10.413065000 | -0.055439000 | 3.386664000 |
| F | 8.314706000  | 1.672544000  | 3.639815000 |
| C | 7.915477000  | -2.266097000 | 4.905089000 |
| C | 6.835680000  | -1.370703000 | 5.033040000 |
| C | 6.945606000  | -0.033314000 | 4.616316000 |
| C | 8.161647000  | 0.398496000  | 4.058216000 |
| C | 9.254439000  | -0.478746000 | 3.920560000 |
| C | 9.127221000  | -1.816467000 | 4.344328000 |
| H | 3.806479000  | 3.435181000  | 2.967096000 |
| H | 3.522314000  | 2.836407000  | 5.218849000 |
| C | -0.981820000 | 6.237774000  | 0.954087000 |
| F | -1.378880000 | 7.325599000  | 0.238626000 |
| F | -0.964569000 | 5.178434000  | 0.088178000 |
| F | -1.975781000 | 5.978217000  | 1.859148000 |
| C | 3.006920000  | 9.196710000  | 2.057014000 |
| F | 2.302069000  | 10.121779000 | 1.349288000 |
| F | 3.223086000  | 9.731707000  | 3.299919000 |
| F | 4.233819000  | 9.096355000  | 1.462604000 |

86

(m-bis-CF3-POCOP)IrH2-IC6F5 NS-bound-a2, E = -3497.846476

|    |              |              |             |
|----|--------------|--------------|-------------|
| Ir | 2.426584000  | 3.959211000  | 4.707941000 |
| P  | 0.880674000  | 2.280585000  | 4.532790000 |
| P  | 3.552073000  | 5.926151000  | 4.323902000 |
| O  | -0.289722000 | 2.900072000  | 3.408346000 |
| C  | 0.147977000  | -0.294989000 | 3.551367000 |
| O  | 2.487444000  | 6.807333000  | 3.263732000 |
| C  | -1.654639000 | 1.588452000  | 5.714472000 |
| C  | 5.605067000  | 7.377771000  | 2.982615000 |
| C  | -0.919880000 | 4.729756000  | 1.978344000 |
| C  | 4.779755000  | 6.803321000  | 6.671367000 |
| C  | 0.503559000  | 6.734776000  | 1.905383000 |
| C  | 6.177756000  | 5.068837000  | 3.890251000 |
| C  | 3.547225000  | 8.616028000  | 5.363709000 |
| C  | 1.378184000  | 6.127196000  | 2.842928000 |
| C  | 1.334311000  | 0.683127000  | 3.643255000 |
| C  | -0.636318000 | 6.019722000  | 1.486335000 |
| C  | 4.656079000  | 5.314916000  | 1.889030000 |
| C  | 1.136497000  | 4.829077000  | 3.345543000 |
| C  | 2.532417000  | 0.049430000  | 4.382382000 |

|   |              |              |             |
|---|--------------|--------------|-------------|
| C | -0.318190000 | 3.532670000  | 6.602315000 |
| C | 5.093663000  | 5.946508000  | 3.233449000 |
| C | 0.472722000  | 1.174846000  | 7.064204000 |
| C | -0.025404000 | 4.150086000  | 2.914530000 |
| C | 3.567053000  | 7.132122000  | 5.777591000 |
| C | 2.254478000  | 6.792420000  | 6.528410000 |
| C | -0.235390000 | 2.089008000  | 6.044019000 |
| C | 1.760823000  | 1.109566000  | 2.217321000 |
| H | -0.130594000 | -0.702896000 | 4.540950000 |
| H | -0.738502000 | 0.186111000  | 3.095553000 |
| H | 0.440667000  | -1.150973000 | 2.908346000 |
| H | -2.125797000 | 2.205157000  | 4.926932000 |
| H | -1.663270000 | 0.534171000  | 5.387320000 |
| H | -2.275649000 | 1.660134000  | 6.631881000 |
| H | 4.803830000  | 8.030176000  | 2.586368000 |
| H | 6.024740000  | 7.833571000  | 3.898753000 |
| H | 6.418183000  | 7.337308000  | 2.228188000 |
| H | 4.835058000  | 5.721032000  | 6.905068000 |
| H | 5.732859000  | 7.111555000  | 6.201043000 |
| H | 4.683362000  | 7.354981000  | 7.629387000 |
| H | 5.822267000  | 4.032505000  | 4.040080000 |
| H | 7.064826000  | 5.037032000  | 3.224340000 |
| H | 6.507742000  | 5.455990000  | 4.871354000 |
| H | 4.493884000  | 8.933711000  | 4.893337000 |
| H | 2.718433000  | 8.828082000  | 4.663218000 |
| H | 3.401513000  | 9.233216000  | 6.274934000 |
| H | 4.217075000  | 4.308252000  | 2.030648000 |
| H | 3.917819000  | 5.948608000  | 1.363636000 |
| H | 5.551098000  | 5.211732000  | 1.241936000 |
| H | 2.274527000  | -0.263348000 | 5.411199000 |
| H | 2.859638000  | -0.852942000 | 3.825814000 |
| H | 3.386715000  | 0.750585000  | 4.442373000 |
| H | -0.769538000 | 4.231177000  | 5.870875000 |
| H | -0.946563000 | 3.539613000  | 7.516694000 |
| H | 0.687730000  | 3.910668000  | 6.885411000 |
| H | 1.517864000  | 1.497367000  | 7.245157000 |
| H | -0.071279000 | 1.221537000  | 8.030306000 |
| H | 0.479656000  | 0.118411000  | 6.734790000 |
| H | 2.260249000  | 5.739939000  | 6.883699000 |
| H | 2.157191000  | 7.446887000  | 7.419140000 |
| H | 1.363765000  | 6.951156000  | 5.888900000 |
| H | 0.910888000  | 1.534288000  | 1.651430000 |
| H | 2.576813000  | 1.857901000  | 2.237938000 |
| H | 2.129986000  | 0.213717000  | 1.677355000 |
| I | 5.342702000  | 2.428982000  | 6.673773000 |
| F | 8.576009000  | -0.861164000 | 9.673297000 |
| F | 10.890466000 | 0.399633000  | 8.903017000 |
| F | 6.165189000  | -0.001117000 | 8.720659000 |
| F | 10.795094000 | 2.530273000  | 7.173336000 |
| F | 8.395358000  | 3.406269000  | 6.208882000 |
| C | 8.520037000  | 0.180795000  | 8.826551000 |
| C | 7.284510000  | 0.636137000  | 8.326395000 |

|   |              |             |             |
|---|--------------|-------------|-------------|
| C | 7.215754000  | 1.725079000 | 7.440602000 |
| C | 8.411667000  | 2.357930000 | 7.057143000 |
| C | 9.657450000  | 1.918940000 | 7.545201000 |
| C | 9.708979000  | 0.825703000 | 8.432568000 |
| H | 3.376667000  | 3.215581000 | 3.752951000 |
| H | 3.334192000  | 3.270551000 | 5.944597000 |
| H | -1.317766000 | 6.476919000 | 0.759288000 |
| C | -2.136619000 | 3.964996000 | 1.521432000 |
| F | -2.864823000 | 4.655476000 | 0.601725000 |
| F | -1.806056000 | 2.767868000 | 0.946774000 |
| F | -2.983946000 | 3.673759000 | 2.556335000 |
| C | 0.810609000  | 8.109422000 | 1.366615000 |
| F | 0.856943000  | 9.054947000 | 2.354208000 |
| F | 2.024558000  | 8.154398000 | 0.734362000 |
| F | -0.117849000 | 8.529370000 | 0.464106000 |

72

(PCP)IrH2 tilted S tol, E = -1727.849173

|    |              |              |              |
|----|--------------|--------------|--------------|
| Ir | -0.000876000 | -0.489905000 | 0.003558000  |
| C  | -0.000239000 | 1.624114000  | -0.011108000 |
| P  | -2.280135000 | -0.186793000 | -0.102866000 |
| P  | 2.278732000  | -0.186665000 | 0.105905000  |
| C  | -2.457506000 | 1.597407000  | -0.655135000 |
| C  | -3.265840000 | -1.155109000 | -1.422371000 |
| C  | -3.125733000 | -0.224788000 | 1.613896000  |
| C  | 2.456958000  | 1.604899000  | 0.633436000  |
| C  | 3.264328000  | -1.137218000 | 1.438324000  |
| C  | 3.124264000  | -0.248769000 | -1.610239000 |
| C  | -1.191481000 | 2.359185000  | -0.305512000 |
| C  | -1.186675000 | 3.771251000  | -0.307912000 |
| C  | 0.000544000  | 4.474792000  | -0.030615000 |
| C  | 1.191395000  | 2.362486000  | 0.273194000  |
| C  | 1.187367000  | 3.774455000  | 0.256275000  |
| H  | -2.110707000 | 4.326887000  | -0.535831000 |
| H  | 0.000837000  | 5.576210000  | -0.038111000 |
| H  | 2.111691000  | 4.332647000  | 0.476647000  |
| H  | -2.578750000 | 1.568383000  | -1.757878000 |
| H  | -3.372821000 | 2.078688000  | -0.254815000 |
| H  | 2.577983000  | 1.591138000  | 1.736513000  |
| H  | 3.372566000  | 2.080040000  | 0.226520000  |
| C  | -3.441294000 | -2.613536000 | -0.954458000 |
| C  | -2.368859000 | -1.137638000 | -2.684046000 |
| C  | -4.633062000 | -0.532037000 | -1.772302000 |
| C  | -2.786100000 | -1.564600000 | 2.302916000  |
| C  | -4.649675000 | -0.015635000 | 1.569201000  |
| C  | -2.468528000 | 0.915031000  | 2.428494000  |
| C  | 2.784799000  | -1.598181000 | -2.280312000 |
| C  | 2.466774000  | 0.879312000  | -2.440789000 |
| C  | 4.648179000  | -0.038647000 | -1.568580000 |
| C  | 3.440492000  | -2.601658000 | 0.989839000  |
| C  | 4.631299000  | -0.509168000 | 1.780270000  |
| C  | 2.367047000  | -1.103296000 | 2.699413000  |
| H  | -2.838532000 | 0.866787000  | 3.474432000  |

|   |              |              |              |
|---|--------------|--------------|--------------|
| H | -1.365810000 | 0.810106000  | 2.434818000  |
| H | -2.713035000 | 1.917140000  | 2.027608000  |
| H | -4.931075000 | 0.901258000  | 1.014673000  |
| H | -5.033664000 | 0.091543000  | 2.606226000  |
| H | -5.172083000 | -0.877137000 | 1.112388000  |
| H | -3.231188000 | -2.432588000 | 1.783208000  |
| H | -3.181003000 | -1.551620000 | 3.341003000  |
| H | -1.689219000 | -1.709916000 | 2.341467000  |
| H | -5.344718000 | -0.567110000 | -0.929493000 |
| H | -5.083871000 | -1.101527000 | -2.613042000 |
| H | -4.538408000 | 0.520399000  | -2.102795000 |
| H | -2.205460000 | -0.109070000 | -3.062783000 |
| H | -1.376467000 | -1.579985000 | -2.473285000 |
| H | -2.862659000 | -1.719603000 | -3.490995000 |
| H | -3.823086000 | -3.228830000 | -1.796408000 |
| H | -4.169776000 | -2.695867000 | -0.125421000 |
| H | -2.476897000 | -3.045987000 | -0.621974000 |
| H | 2.837270000  | 0.816861000  | -3.485802000 |
| H | 1.364125000  | 0.773605000  | -2.446097000 |
| H | 2.710464000  | 1.886993000  | -2.053629000 |
| H | 3.230654000  | -2.458697000 | -1.748969000 |
| H | 3.178939000  | -1.599390000 | -3.318767000 |
| H | 1.687956000  | -1.744503000 | -2.316028000 |
| H | 4.929345000  | 0.886020000  | -1.026995000 |
| H | 5.032068000  | 0.054085000  | -2.607030000 |
| H | 5.170884000  | -0.893497000 | -1.099748000 |
| H | 3.822302000  | -3.205520000 | 1.840018000  |
| H | 4.169304000  | -2.694615000 | 0.162223000  |
| H | 2.476453000  | -3.039058000 | 0.662826000  |
| H | 2.203568000  | -0.069850000 | 3.064596000  |
| H | 1.374703000  | -1.548314000 | 2.494094000  |
| H | 2.860604000  | -1.674682000 | 3.514037000  |
| H | 5.342972000  | -0.554637000 | 0.937977000  |
| H | 5.082340000  | -1.067733000 | 2.628186000  |
| H | 4.536231000  | 0.547333000  | 2.097386000  |
| H | 0.009138000  | -1.919189000 | 0.742274000  |
| H | -0.012111000 | -1.929033000 | -0.715635000 |

72

(PCP)IrH<sub>2</sub> flat S tol, E = -1727.848269

|    |              |              |              |
|----|--------------|--------------|--------------|
| C  | -3.692941000 | -0.884386000 | 1.219812000  |
| C  | -2.287749000 | -0.744390000 | 1.225790000  |
| C  | -1.559373000 | -0.621345000 | -0.000103000 |
| C  | -2.287253000 | -0.745818000 | -1.226180000 |
| C  | -3.692416000 | -0.885910000 | -1.220621000 |
| C  | -4.392552000 | -0.937118000 | -0.000522000 |
| H  | -4.245695000 | -0.956634000 | 2.170400000  |
| H  | -4.244703000 | -0.959514000 | -2.171363000 |
| H  | -5.489725000 | -1.034401000 | -0.000640000 |
| P  | 0.189120000  | -0.053936000 | -2.283851000 |
| P  | 0.188933000  | -0.053357000 | 2.283872000  |
| Ir | 0.485430000  | -0.085482000 | 0.000046000  |
| C  | 0.013916000  | 1.714993000  | -2.994337000 |

|   |              |              |              |
|---|--------------|--------------|--------------|
| C | 1.317587000  | -1.165865000 | -3.350688000 |
| C | 0.015372000  | 1.715561000  | 2.994816000  |
| C | 1.316670000  | -1.166366000 | 3.350438000  |
| C | 1.265753000  | 2.542592000  | -2.631957000 |
| H | 1.116352000  | 3.591671000  | -2.964761000 |
| H | 1.430490000  | 2.540067000  | -1.537768000 |
| H | 2.180848000  | 2.161081000  | -3.120220000 |
| C | 2.712262000  | -0.517191000 | -3.454974000 |
| H | 3.085830000  | -0.208142000 | -2.458688000 |
| H | 3.429819000  | -1.250077000 | -3.880720000 |
| H | 2.706465000  | 0.367470000  | -4.119921000 |
| C | -1.200971000 | 2.329989000  | -2.258550000 |
| H | -2.154334000 | 1.837368000  | -2.528359000 |
| H | -1.074234000 | 2.250313000  | -1.160837000 |
| H | -1.283245000 | 3.403190000  | -2.531202000 |
| C | -0.223918000 | 1.753473000  | -4.514787000 |
| H | -0.478853000 | 2.791412000  | -4.817982000 |
| H | 0.679575000  | 1.457828000  | -5.080602000 |
| H | -1.062698000 | 1.100759000  | -4.826915000 |
| C | 0.762842000  | -1.479166000 | -4.755051000 |
| H | 0.715418000  | -0.585593000 | -5.401441000 |
| H | 1.431983000  | -2.214349000 | -5.251260000 |
| H | -0.247141000 | -1.930995000 | -4.712953000 |
| C | 1.434419000  | -2.483032000 | -2.545346000 |
| H | 1.828622000  | -2.291428000 | -1.528198000 |
| H | 0.455107000  | -2.990436000 | -2.436730000 |
| H | 2.118457000  | -3.178418000 | -3.076695000 |
| C | 1.268428000  | 2.541892000  | 2.633750000  |
| H | 1.434808000  | 2.538482000  | 1.539803000  |
| H | 1.119386000  | 3.591319000  | 2.965584000  |
| H | 2.182485000  | 2.160002000  | 3.123660000  |
| C | 2.711800000  | -0.518568000 | 3.454438000  |
| H | 3.429087000  | -1.252079000 | 3.879544000  |
| H | 3.085108000  | -0.209304000 | 2.458130000  |
| H | 2.706757000  | 0.365805000  | 4.119755000  |
| C | -1.198215000 | 2.332177000  | 2.258159000  |
| H | -1.070200000 | 2.253335000  | 1.160527000  |
| H | -2.152343000 | 1.840156000  | 2.526357000  |
| H | -1.280001000 | 3.405218000  | 2.531595000  |
| C | -0.223531000 | 1.753805000  | 4.515128000  |
| H | 0.679372000  | 1.457381000  | 5.081474000  |
| H | -0.477826000 | 2.791885000  | 4.818380000  |
| H | -1.063024000 | 1.101709000  | 4.826711000  |
| C | 0.762281000  | -1.479483000 | 4.754956000  |
| H | 1.431046000  | -2.215276000 | 5.250748000  |
| H | 0.715768000  | -0.585985000 | 5.401508000  |
| H | -0.248040000 | -1.930618000 | 4.713432000  |
| C | 1.432696000  | -2.483412000 | 2.544836000  |
| H | 0.453353000  | -2.990849000 | 2.436826000  |
| H | 1.826136000  | -2.291701000 | 1.527412000  |
| H | 2.116962000  | -3.179013000 | 3.075589000  |
| C | -1.520690000 | -0.782510000 | 2.535548000  |

|   |              |              |              |
|---|--------------|--------------|--------------|
| H | -2.065830000 | -0.300525000 | 3.371347000  |
| H | -1.375632000 | -1.841586000 | 2.834090000  |
| C | -1.519577000 | -0.784979000 | -2.535519000 |
| H | -1.372469000 | -1.844260000 | -2.832288000 |
| H | -2.064865000 | -0.304996000 | -3.372391000 |
| H | 1.647844000  | 1.019869000  | -0.000036000 |
| H | 2.066551000  | -0.393881000 | -0.000011000 |

72

(PCP)IrH<sub>2</sub> tilted NS tol, E = -1727.84831

|    |              |              |              |
|----|--------------|--------------|--------------|
| Ir | -0.011616000 | -0.485070000 | 0.090175000  |
| C  | 0.012503000  | 1.616664000  | 0.040157000  |
| P  | -2.290830000 | -0.163901000 | -0.026681000 |
| P  | 2.272776000  | -0.208989000 | 0.128367000  |
| C  | -2.446190000 | 1.620250000  | -0.588584000 |
| C  | -3.127625000 | -1.147732000 | -1.430494000 |
| C  | -3.247599000 | -0.232403000 | 1.617746000  |
| C  | 2.474899000  | 1.577691000  | 0.653596000  |
| C  | 3.347269000  | -1.176981000 | 1.372902000  |
| C  | 2.985522000  | -0.277594000 | -1.647706000 |
| C  | -1.170627000 | 2.371709000  | -0.243976000 |
| C  | -1.149536000 | 3.783392000  | -0.257013000 |
| C  | 0.048156000  | 4.479533000  | -0.005038000 |
| C  | 1.214489000  | 2.351367000  | 0.301800000  |
| C  | 1.229173000  | 3.761941000  | 0.268323000  |
| H  | -2.072180000 | 4.345783000  | -0.476426000 |
| H  | 0.061674000  | 5.580576000  | -0.021403000 |
| H  | 2.165796000  | 4.308182000  | 0.468386000  |
| H  | -2.571376000 | 1.588737000  | -1.691144000 |
| H  | -3.359756000 | 2.107370000  | -0.191870000 |
| H  | 2.602012000  | 1.552276000  | 1.756850000  |
| H  | 3.396850000  | 2.038541000  | 0.244246000  |
| C  | -3.345568000 | -2.604669000 | -0.977729000 |
| C  | -2.064657000 | -1.127520000 | -2.557800000 |
| C  | -4.445186000 | -0.539464000 | -1.949004000 |
| C  | -2.942559000 | -1.572920000 | 2.320478000  |
| C  | -4.766332000 | -0.052208000 | 1.438014000  |
| C  | -2.685794000 | 0.922225000  | 2.481381000  |
| C  | 2.595274000  | -1.630105000 | -2.285412000 |
| C  | 2.280800000  | 0.851116000  | -2.438499000 |
| C  | 4.508765000  | -0.069079000 | -1.717518000 |
| C  | 3.562826000  | -2.614871000 | 0.861359000  |
| C  | 4.700032000  | -0.496351000 | 1.670839000  |
| C  | 2.513809000  | -1.236935000 | 2.675053000  |
| H  | -3.131608000 | 0.859934000  | 3.496203000  |
| H  | -1.585179000 | 0.857443000  | 2.577710000  |
| H  | -2.930850000 | 1.917145000  | 2.063916000  |
| H  | -5.013579000 | 0.868635000  | 0.873711000  |
| H  | -5.245614000 | 0.029575000  | 2.436715000  |
| H  | -5.225226000 | -0.915686000 | 0.920675000  |
| H  | -3.351458000 | -2.438037000 | 1.767823000  |
| H  | -3.401369000 | -1.567319000 | 3.331737000  |
| H  | -1.851411000 | -1.723862000 | 2.426830000  |

|   |              |              |              |
|---|--------------|--------------|--------------|
| H | -5.244330000 | -0.556243000 | -1.186775000 |
| H | -4.800428000 | -1.133002000 | -2.818455000 |
| H | -4.317354000 | 0.504712000  | -2.293881000 |
| H | -1.846987000 | -0.099958000 | -2.911673000 |
| H | -1.116698000 | -1.589912000 | -2.205601000 |
| H | -2.427445000 | -1.713816000 | -3.428133000 |
| H | -3.622844000 | -3.225949000 | -1.855478000 |
| H | -4.165942000 | -2.686650000 | -0.239333000 |
| H | -2.421323000 | -3.023203000 | -0.533083000 |
| H | 2.604866000  | 0.799904000  | -3.499183000 |
| H | 1.178162000  | 0.748173000  | -2.407289000 |
| H | 2.528434000  | 1.857475000  | -2.052017000 |
| H | 3.100698000  | -2.486298000 | -1.804577000 |
| H | 2.879994000  | -1.624761000 | -3.358864000 |
| H | 1.502829000  | -1.803425000 | -2.214039000 |
| H | 4.822475000  | 0.870856000  | -1.222218000 |
| H | 4.819867000  | -0.004163000 | -2.782098000 |
| H | 5.064945000  | -0.909671000 | -1.262344000 |
| H | 4.003958000  | -3.230591000 | 1.673384000  |
| H | 4.259461000  | -2.649922000 | 0.002427000  |
| H | 2.601812000  | -3.077332000 | 0.561147000  |
| H | 2.254641000  | -0.227612000 | 3.052887000  |
| H | 1.573290000  | -1.797013000 | 2.515551000  |
| H | 3.105260000  | -1.750655000 | 3.461958000  |
| H | 5.345643000  | -0.423042000 | 0.778430000  |
| H | 5.245270000  | -1.097035000 | 2.429705000  |
| H | 4.569639000  | 0.520275000  | 2.088945000  |
| H | -0.047081000 | -0.500520000 | 1.625875000  |
| H | -0.032481000 | -2.171558000 | 0.152104000  |

84

(PCP)IrH<sub>2</sub>-IC6F<sub>5</sub>-tilted, E = -2752.690815

|    |              |              |              |
|----|--------------|--------------|--------------|
| Ir | 0.036117000  | -0.302192000 | -0.110431000 |
| C  | 0.046478000  | 1.778136000  | -0.111587000 |
| P  | -2.257772000 | -0.006206000 | -0.081841000 |
| P  | 2.341951000  | -0.024730000 | -0.113950000 |
| C  | -2.437870000 | 1.772656000  | -0.628959000 |
| C  | -3.393093000 | -0.962426000 | -1.277103000 |
| C  | -2.892626000 | -0.046172000 | 1.720587000  |
| C  | 2.510646000  | 1.739349000  | 0.492972000  |
| C  | 3.292811000  | -1.036408000 | 1.194129000  |
| C  | 3.192984000  | -0.013734000 | -1.819538000 |
| C  | -1.155549000 | 2.525534000  | -0.325397000 |
| C  | -1.150641000 | 3.935056000  | -0.268864000 |
| C  | 0.044967000  | 4.634213000  | -0.014669000 |
| C  | 1.243370000  | 2.509660000  | 0.169852000  |
| C  | 1.237741000  | 3.920679000  | 0.205283000  |
| H  | -2.086757000 | 4.493275000  | -0.432478000 |
| H  | 0.045069000  | 5.734722000  | 0.017951000  |
| H  | 2.171190000  | 4.466512000  | 0.418633000  |
| H  | -2.599476000 | 1.732657000  | -1.726919000 |
| H  | -3.335818000 | 2.258251000  | -0.197165000 |
| H  | 2.631291000  | 1.673901000  | 1.594506000  |



|   |              |              |              |
|---|--------------|--------------|--------------|
| H | 3.427717000  | 2.230753000  | 0.110882000  |
| C | -3.642990000 | -2.385885000 | -0.741002000 |
| C | -2.610268000 | -1.053239000 | -2.608433000 |
| C | -4.734559000 | -0.241261000 | -1.531133000 |
| C | -2.531407000 | -1.412848000 | 2.345605000  |
| C | -4.401646000 | 0.225251000  | 1.852935000  |
| C | -2.105260000 | 1.053233000  | 2.473800000  |
| C | 2.853078000  | -1.317089000 | -2.570867000 |
| C | 2.587663000  | 1.178407000  | -2.598481000 |
| C | 4.719701000  | 0.163748000  | -1.717709000 |
| C | 3.543178000  | -2.463028000 | 0.668701000  |
| C | 4.617417000  | -0.390385000 | 1.649179000  |
| C | 2.316268000  | -1.103420000 | 2.394714000  |
| H | -2.388719000 | 1.024129000  | 3.546587000  |
| H | -1.010061000 | 0.895831000  | 2.403989000  |
| H | -2.317305000 | 2.068198000  | 2.088719000  |
| H | -4.697712000 | 1.176006000  | 1.367654000  |
| H | -4.664039000 | 0.304959000  | 2.929299000  |
| H | -5.009125000 | -0.593641000 | 1.424825000  |
| H | -3.089566000 | -2.248920000 | 1.888914000  |
| H | -2.774434000 | -1.392290000 | 3.428790000  |
| H | -1.450463000 | -1.629948000 | 2.234660000  |
| H | -5.338247000 | -0.127802000 | -0.613896000 |
| H | -5.329002000 | -0.843200000 | -2.250510000 |
| H | -4.591860000 | 0.759954000  | -1.980687000 |
| H | -2.333546000 | -0.054031000 | -3.000380000 |
| H | -1.686556000 | -1.648674000 | -2.489306000 |
| H | -3.248535000 | -1.549124000 | -3.369345000 |
| H | -4.112792000 | -2.999009000 | -1.538188000 |
| H | -4.328165000 | -2.384962000 | 0.127717000  |
| H | -2.697057000 | -2.882574000 | -0.453400000 |
| H | 2.973262000  | 1.153246000  | -3.639001000 |
| H | 1.483219000  | 1.123474000  | -2.634799000 |
| H | 2.864367000  | 2.154851000  | -2.158207000 |
| H | 3.233405000  | -2.220689000 | -2.062490000 |
| H | 3.306981000  | -1.279474000 | -3.583516000 |
| H | 1.759895000  | -1.436787000 | -2.685116000 |
| H | 4.999595000  | 1.060703000  | -1.131039000 |
| H | 5.136635000  | 0.290742000  | -2.739067000 |
| H | 5.209853000  | -0.719807000 | -1.268224000 |
| H | 3.910914000  | -3.100399000 | 1.500136000  |
| H | 4.310042000  | -2.480956000 | -0.128569000 |
| H | 2.615578000  | -2.918811000 | 0.272730000  |
| H | 2.068138000  | -0.097082000 | 2.789236000  |
| H | 1.373129000  | -1.612534000 | 2.108839000  |
| H | 2.782564000  | -1.679809000 | 3.220959000  |
| H | 5.360507000  | -0.331703000 | 0.834851000  |
| H | 5.057743000  | -1.010886000 | 2.458406000  |
| H | 4.469789000  | 0.627077000  | 2.059292000  |
| H | -0.009667000 | -1.997928000 | 0.132214000  |
| H | 0.012839000  | -0.315994000 | -1.646943000 |
| I | 0.150809000  | -3.739081000 | -1.227265000 |

|   |              |              |              |
|---|--------------|--------------|--------------|
| C | 0.335516000  | -5.563381000 | -2.415708000 |
| C | -0.792878000 | -6.313217000 | -2.780651000 |
| C | 1.595754000  | -5.997824000 | -2.854915000 |
| C | -0.678093000 | -7.479449000 | -3.562206000 |
| C | 1.740599000  | -7.159959000 | -3.637235000 |
| C | 0.595742000  | -7.900399000 | -3.992578000 |
| F | 2.713987000  | -5.308816000 | -2.533702000 |
| F | -2.028878000 | -5.934068000 | -2.387909000 |
| F | -1.766498000 | -8.193129000 | -3.906087000 |
| F | 0.719162000  | -9.009636000 | -4.739964000 |
| F | 2.954070000  | -7.569486000 | -4.052123000 |

12

IC6F5 S tol, E = -1024.819381

|   |             |              |              |
|---|-------------|--------------|--------------|
| I | 3.205353000 | -0.037483000 | -0.024314000 |
| F | 8.125274000 | 2.267686000  | -0.017344000 |
| F | 9.457637000 | -0.132274000 | -0.027777000 |
| F | 5.398175000 | 2.320860000  | -0.015654000 |
| F | 8.053003000 | -2.490787000 | -0.036515000 |
| F | 5.325606000 | -2.461122000 | -0.034967000 |
| C | 7.433870000 | 1.118771000  | -0.021530000 |
| C | 6.025752000 | 1.135554000  | -0.020656000 |
| C | 5.294093000 | -0.069116000 | -0.025164000 |
| C | 5.988877000 | -1.295416000 | -0.030484000 |
| C | 7.396857000 | -1.321383000 | -0.031379000 |
| C | 8.119301000 | -0.111984000 | -0.026966000 |

68

(p-H-POCOP)IrH2 S CH<sub>2</sub>Cl<sub>2</sub>, E = -1799.619572

|    |              |              |              |
|----|--------------|--------------|--------------|
| C  | -0.355759000 | 1.219202000  | -3.618669000 |
| C  | -0.232887000 | 1.205719000  | -2.212309000 |
| C  | -0.172450000 | -0.010647000 | -1.482883000 |
| C  | -0.237534000 | -1.230657000 | -2.205789000 |
| C  | -0.358754000 | -1.251086000 | -3.612235000 |
| C  | -0.416346000 | -0.017650000 | -4.295171000 |
| H  | -0.401942000 | 2.171542000  | -4.165630000 |
| H  | -0.407043000 | -2.206106000 | -4.154310000 |
| H  | -0.511624000 | -0.020384000 | -5.392345000 |
| O  | -0.181426000 | -2.423193000 | -1.518674000 |
| O  | -0.168533000 | 2.401775000  | -1.531877000 |
| P  | -0.028714000 | -2.262147000 | 0.212959000  |
| P  | -0.018924000 | 2.249238000  | 0.200810000  |
| Ir | 0.005895000  | -0.005609000 | 0.588119000  |
| H  | 0.944751000  | 0.012533000  | 1.888942000  |
| H  | -0.666463000 | -0.015036000 | 2.048313000  |
| C  | 1.600229000  | -3.197450000 | 0.454408000  |
| C  | -1.581121000 | -3.224074000 | 0.717537000  |
| C  | 1.601450000  | 3.205230000  | 0.424012000  |
| C  | -1.579267000 | 3.191911000  | 0.714290000  |
| C  | 1.976461000  | -3.145547000 | 1.950841000  |
| H  | 2.993606000  | -3.571065000 | 2.079079000  |
| H  | 1.985862000  | -2.103269000 | 2.324206000  |
| H  | 1.283875000  | -3.736558000 | 2.578415000  |
| C  | -1.525910000 | -3.482947000 | 2.236859000  |

|   |              |              |              |
|---|--------------|--------------|--------------|
| H | -1.289914000 | -2.557488000 | 2.799320000  |
| H | -2.516797000 | -3.848475000 | 2.578196000  |
| H | -0.777209000 | -4.255759000 | 2.495896000  |
| C | 2.635593000  | -2.383097000 | -0.360035000 |
| H | 2.416898000  | -2.418967000 | -1.444258000 |
| H | 2.645028000  | -1.321168000 | -0.042587000 |
| H | 3.644062000  | -2.814926000 | -0.192500000 |
| C | 1.563831000  | -4.649932000 | -0.053546000 |
| H | 2.596809000  | -5.057093000 | -0.050427000 |
| H | 0.950373000  | -5.299257000 | 0.598231000  |
| H | 1.175350000  | -4.710429000 | -1.087954000 |
| C | -1.783293000 | -4.537483000 | -0.062905000 |
| H | -1.047387000 | -5.311407000 | 0.216249000  |
| H | -2.792841000 | -4.936075000 | 0.170987000  |
| H | -1.724029000 | -4.368871000 | -1.154422000 |
| C | -2.746819000 | -2.257279000 | 0.391885000  |
| H | -2.640748000 | -1.301182000 | 0.940822000  |
| H | -2.788436000 | -2.026843000 | -0.690565000 |
| H | -3.704969000 | -2.736792000 | 0.682183000  |
| C | 1.823396000  | 3.451062000  | 1.930265000  |
| H | 1.691153000  | 2.520807000  | 2.518105000  |
| H | 2.860583000  | 3.812954000  | 2.089130000  |
| H | 1.136091000  | 4.221998000  | 2.327670000  |
| C | -1.682725000 | 3.164521000  | 2.254268000  |
| H | -2.663010000 | 3.589697000  | 2.554867000  |
| H | -1.619716000 | 2.128770000  | 2.640561000  |
| H | -0.892614000 | 3.768354000  | 2.737958000  |
| C | 2.686675000  | 2.239908000  | -0.114784000 |
| H | 2.678700000  | 1.279139000  | 0.436041000  |
| H | 2.532158000  | 2.019169000  | -1.188943000 |
| H | 3.682586000  | 2.715978000  | 0.002431000  |
| C | 1.662163000  | 4.524624000  | -0.369778000 |
| H | 0.993351000  | 5.297923000  | 0.046384000  |
| H | 2.699097000  | 4.918634000  | -0.322419000 |
| H | 1.402707000  | 4.365594000  | -1.433178000 |
| C | -1.637722000 | 4.635866000  | 0.184127000  |
| H | -2.655985000 | 5.041602000  | 0.361261000  |
| H | -0.922809000 | 5.297289000  | 0.707538000  |
| H | -1.436502000 | 4.679575000  | -0.903145000 |
| C | -2.741218000 | 2.365261000  | 0.109791000  |
| H | -2.716501000 | 2.380604000  | -0.996505000 |
| H | -2.693723000 | 1.309272000  | 0.443307000  |
| H | -3.704954000 | 2.802473000  | 0.443884000  |

68

(p-H-POCOP)IrH<sub>2</sub> NS CH<sub>2</sub>Cl<sub>2</sub>, E = -1799.62042

|   |              |              |              |
|---|--------------|--------------|--------------|
| C | -0.183594000 | 1.113060000  | -3.701922000 |
| C | -0.154217000 | 1.180320000  | -2.292859000 |
| C | -0.123211000 | 0.016671000  | -1.484113000 |
| C | -0.114100000 | -1.238483000 | -2.142663000 |
| C | -0.142786000 | -1.347017000 | -3.549162000 |
| C | -0.177782000 | -0.159866000 | -4.312367000 |
| H | -0.207635000 | 2.033841000  | -4.302384000 |

|    |              |              |              |
|----|--------------|--------------|--------------|
| H  | -0.135220000 | -2.335282000 | -4.031059000 |
| H  | -0.200671000 | -0.228445000 | -5.411083000 |
| O  | -0.069081000 | -2.391321000 | -1.375512000 |
| O  | -0.148626000 | 2.420060000  | -1.674306000 |
| P  | -0.058445000 | -2.129586000 | 0.340096000  |
| P  | -0.125959000 | 2.373511000  | 0.060502000  |
| Ir | -0.117707000 | 0.145882000  | 0.592272000  |
| H  | 1.376649000  | 0.192396000  | 0.961936000  |
| H  | -0.213617000 | 0.246388000  | 2.259819000  |
| C  | 1.512849000  | -3.074990000 | 0.793142000  |
| C  | -1.672829000 | -3.016218000 | 0.782570000  |
| C  | 1.419847000  | 3.410650000  | 0.382214000  |
| C  | -1.763340000 | 3.262944000  | 0.400237000  |
| C  | 1.811334000  | -2.829540000 | 2.288101000  |
| H  | 2.783905000  | -3.300785000 | 2.540947000  |
| H  | 1.877862000  | -1.747009000 | 2.509537000  |
| H  | 1.041097000  | -3.270886000 | 2.947407000  |
| C  | -1.696564000 | -3.285531000 | 2.300222000  |
| H  | -1.446127000 | -2.373115000 | 2.877473000  |
| H  | -2.716490000 | -3.609433000 | 2.595062000  |
| H  | -0.993528000 | -4.090919000 | 2.586406000  |
| C  | 2.634576000  | -2.445699000 | -0.067568000 |
| H  | 2.466990000  | -2.627702000 | -1.145649000 |
| H  | 2.707195000  | -1.352482000 | 0.093219000  |
| H  | 3.603303000  | -2.904168000 | 0.219609000  |
| C  | 1.412637000  | -4.581580000 | 0.490152000  |
| H  | 2.407661000  | -5.047230000 | 0.650075000  |
| H  | 0.695458000  | -5.090611000 | 1.160938000  |
| H  | 1.114227000  | -4.765816000 | -0.559625000 |
| C  | -1.923408000 | -4.306706000 | -0.020136000 |
| H  | -1.221794000 | -5.114765000 | 0.251223000  |
| H  | -2.950979000 | -4.666207000 | 0.198737000  |
| H  | -1.845568000 | -4.122310000 | -1.107755000 |
| C  | -2.758755000 | -1.971708000 | 0.420749000  |
| H  | -2.631410000 | -1.042676000 | 1.016322000  |
| H  | -2.731962000 | -1.708206000 | -0.654670000 |
| H  | -3.762556000 | -2.385272000 | 0.651071000  |
| C  | 1.730479000  | 3.362056000  | 1.893954000  |
| H  | 1.834531000  | 2.318168000  | 2.247286000  |
| H  | 2.687375000  | 3.892826000  | 2.079913000  |
| H  | 0.947543000  | 3.855837000  | 2.498889000  |
| C  | -1.790023000 | 3.717739000  | 1.872955000  |
| H  | -2.818269000 | 4.045960000  | 2.131833000  |
| H  | -1.511102000 | 2.891820000  | 2.557469000  |
| H  | -1.110094000 | 4.572291000  | 2.052638000  |
| C  | 2.555615000  | 2.709742000  | -0.401289000 |
| H  | 2.657583000  | 1.646977000  | -0.107311000 |
| H  | 2.380114000  | 2.752505000  | -1.492555000 |
| H  | 3.512595000  | 3.225278000  | -0.178795000 |
| C  | 1.276496000  | 4.864511000  | -0.105154000 |
| H  | 0.548819000  | 5.433740000  | 0.503007000  |
| H  | 2.258941000  | 5.373157000  | -0.012600000 |

|   |              |             |              |
|---|--------------|-------------|--------------|
| H | 0.968089000  | 4.908710000 | -1.167196000 |
| C | -2.053406000 | 4.436579000 | -0.554137000 |
| H | -3.090369000 | 4.790677000 | -0.374498000 |
| H | -1.374587000 | 5.291504000 | -0.389195000 |
| H | -1.973622000 | 4.121403000 | -1.611154000 |
| C | -2.820525000 | 2.152016000 | 0.178303000  |
| H | -2.792120000 | 1.759757000 | -0.857094000 |
| H | -2.662773000 | 1.306817000 | 0.881716000  |
| H | -3.834248000 | 2.562911000 | 0.365672000  |

68

(p-H-POCOP)IrH<sub>2</sub> S CH<sub>2</sub>Cl<sub>2</sub> with epsilon=24.2, E = -1799.620412

|    |              |              |              |
|----|--------------|--------------|--------------|
| C  | -0.353432000 | 1.221865000  | -3.618709000 |
| C  | -0.234494000 | 1.208125000  | -2.211800000 |
| C  | -0.171729000 | -0.008569000 | -1.482897000 |
| C  | -0.230486000 | -1.228563000 | -2.206569000 |
| C  | -0.347732000 | -1.248592000 | -3.613583000 |
| C  | -0.407769000 | -0.014922000 | -4.296099000 |
| H  | -0.401119000 | 2.174241000  | -4.165598000 |
| H  | -0.390978000 | -2.203389000 | -4.156585000 |
| H  | -0.499867000 | -0.017405000 | -5.393564000 |
| O  | -0.171665000 | -2.421050000 | -1.520284000 |
| O  | -0.175598000 | 2.403841000  | -1.530811000 |
| P  | -0.028336000 | -2.261664000 | 0.213117000  |
| P  | -0.022427000 | 2.251295000  | 0.202461000  |
| Ir | 0.000500000  | -0.004434000 | 0.588492000  |
| H  | 0.953472000  | 0.012389000  | 1.876529000  |
| H  | -0.663332000 | -0.013280000 | 2.054318000  |
| C  | 1.599167000  | -3.196467000 | 0.464371000  |
| C  | -1.583232000 | -3.224876000 | 0.707894000  |
| C  | 1.601474000  | 3.201325000  | 0.422521000  |
| C  | -1.581117000 | 3.196204000  | 0.716175000  |
| C  | 1.968738000  | -3.138587000 | 1.962384000  |
| H  | 2.983524000  | -3.567653000 | 2.096942000  |
| H  | 1.980955000  | -2.094570000 | 2.330737000  |
| H  | 1.271027000  | -3.723721000 | 2.589729000  |
| C  | -1.534177000 | -3.489152000 | 2.226486000  |
| H  | -1.302021000 | -2.565513000 | 2.793560000  |
| H  | -2.526148000 | -3.857147000 | 2.561872000  |
| H  | -0.785726000 | -4.262090000 | 2.485796000  |
| C  | 2.639013000  | -2.386805000 | -0.348841000 |
| H  | 2.425936000  | -2.428406000 | -1.434008000 |
| H  | 2.647498000  | -1.323311000 | -0.036688000 |
| H  | 3.646287000  | -2.818314000 | -0.173757000 |
| C  | 1.563838000  | -4.651528000 | -0.036311000 |
| H  | 2.596356000  | -5.059577000 | -0.024387000 |
| H  | 0.945643000  | -5.296482000 | 0.615332000  |
| H  | 1.182051000  | -4.717697000 | -1.072885000 |
| C  | -1.782635000 | -4.535806000 | -0.077537000 |
| H  | -1.047526000 | -5.310552000 | 0.201269000  |
| H  | -2.792811000 | -4.935027000 | 0.152382000  |
| H  | -1.720563000 | -4.363767000 | -1.168380000 |
| C  | -2.747599000 | -2.257022000 | 0.380715000  |

|   |              |              |              |
|---|--------------|--------------|--------------|
| H | -2.643919000 | -1.302784000 | 0.933430000  |
| H | -2.785020000 | -2.023052000 | -0.701181000 |
| H | -3.706855000 | -2.737480000 | 0.665582000  |
| C | 1.845765000  | 3.413398000  | 1.930592000  |
| H | 1.724359000  | 2.469395000  | 2.498343000  |
| H | 2.884522000  | 3.774110000  | 2.081352000  |
| H | 1.163167000  | 4.173042000  | 2.356396000  |
| C | -1.665491000 | 3.201399000  | 2.257376000  |
| H | -2.648871000 | 3.617188000  | 2.560790000  |
| H | -1.580824000 | 2.175997000  | 2.666848000  |
| H | -0.879875000 | 3.829656000  | 2.716806000  |
| C | 2.678064000  | 2.246969000  | -0.152030000 |
| H | 2.671663000  | 1.272030000  | 0.373483000  |
| H | 2.513225000  | 2.055535000  | -1.230196000 |
| H | 3.676470000  | 2.716631000  | -0.031079000 |
| C | 1.651169000  | 4.538069000  | -0.342017000 |
| H | 0.993942000  | 5.303263000  | 0.106633000  |
| H | 2.690179000  | 4.927726000  | -0.306789000 |
| H | 1.369574000  | 4.405205000  | -1.403465000 |
| C | -1.655954000 | 4.627983000  | 0.155461000  |
| H | -2.676368000 | 5.028348000  | 0.332098000  |
| H | -0.942891000 | 5.306595000  | 0.658450000  |
| H | -1.463555000 | 4.649647000  | -0.934037000 |
| C | -2.744678000 | 2.349521000  | 0.142918000  |
| H | -2.729252000 | 2.336188000  | -0.963718000 |
| H | -2.689968000 | 1.302698000  | 0.503151000  |
| H | -3.707428000 | 2.791648000  | 0.473315000  |

68

(p-H-POCOP)IrH<sub>2</sub> NS CH<sub>2</sub>Cl<sub>2</sub> with epsilon=24.2, E = -1799.621512

|    |              |              |              |
|----|--------------|--------------|--------------|
| C  | -0.179989000 | 1.112529000  | -3.702601000 |
| C  | -0.150612000 | 1.180290000  | -2.293309000 |
| C  | -0.120268000 | 0.016877000  | -1.484181000 |
| C  | -0.112090000 | -1.238495000 | -2.142337000 |
| C  | -0.140779000 | -1.347494000 | -3.549046000 |
| C  | -0.174832000 | -0.160596000 | -4.312897000 |
| H  | -0.203779000 | 2.033139000  | -4.303465000 |
| H  | -0.134228000 | -2.335961000 | -4.030701000 |
| H  | -0.197748000 | -0.229517000 | -5.411621000 |
| O  | -0.068588000 | -2.391112000 | -1.375093000 |
| O  | -0.145066000 | 2.420054000  | -1.675412000 |
| P  | -0.057543000 | -2.130173000 | 0.341113000  |
| P  | -0.124175000 | 2.374800000  | 0.059965000  |
| Ir | -0.114265000 | 0.146394000  | 0.591348000  |
| H  | 1.386155000  | 0.191776000  | 0.934039000  |
| H  | -0.200381000 | 0.247645000  | 2.260536000  |
| C  | 1.511932000  | -3.078443000 | 0.793481000  |
| C  | -1.673345000 | -3.013288000 | 0.784715000  |
| C  | 1.419211000  | 3.414819000  | 0.382912000  |
| C  | -1.763739000 | 3.260023000  | 0.398336000  |
| C  | 1.811886000  | -2.832428000 | 2.288059000  |
| H  | 2.782733000  | -3.307200000 | 2.540736000  |
| H  | 1.883138000  | -1.749827000 | 2.507856000  |

|   |              |              |              |
|---|--------------|--------------|--------------|
| H | 1.040338000  | -3.270172000 | 2.948192000  |
| C | -1.694767000 | -3.288096000 | 2.301497000  |
| H | -1.441783000 | -2.378692000 | 2.882403000  |
| H | -2.714950000 | -3.610967000 | 2.596398000  |
| H | -0.993020000 | -4.096062000 | 2.583342000  |
| C | 2.635115000  | -2.452925000 | -0.067981000 |
| H | 2.466512000  | -2.634599000 | -1.145984000 |
| H | 2.711963000  | -1.359997000 | 0.093121000  |
| H | 3.602325000  | -2.914768000 | 0.218750000  |
| C | 1.407340000  | -4.585051000 | 0.491942000  |
| H | 2.400845000  | -5.053303000 | 0.653389000  |
| H | 0.687881000  | -5.091195000 | 1.162405000  |
| H | 1.109599000  | -4.769470000 | -0.558003000 |
| C | -1.928859000 | -4.300792000 | -0.021292000 |
| H | -1.226837000 | -5.110471000 | 0.244078000  |
| H | -2.955789000 | -4.659646000 | 0.201357000  |
| H | -1.856241000 | -4.112757000 | -1.108646000 |
| C | -2.757372000 | -1.964975000 | 0.428427000  |
| H | -2.626850000 | -1.038145000 | 1.026839000  |
| H | -2.732484000 | -1.698333000 | -0.646285000 |
| H | -3.761679000 | -2.376585000 | 0.659817000  |
| C | 1.729936000  | 3.363704000  | 1.894584000  |
| H | 1.840020000  | 2.319300000  | 2.244630000  |
| H | 2.683908000  | 3.899175000  | 2.081811000  |
| H | 0.944311000  | 3.851681000  | 2.500768000  |
| C | -1.792766000 | 3.715270000  | 1.870919000  |
| H | -2.821709000 | 4.042764000  | 2.127736000  |
| H | -1.514650000 | 2.889798000  | 2.556327000  |
| H | -1.113632000 | 4.570244000  | 2.051375000  |
| C | 2.557179000  | 2.718982000  | -0.401839000 |
| H | 2.662902000  | 1.656007000  | -0.109729000 |
| H | 2.381980000  | 2.763713000  | -1.493104000 |
| H | 3.512371000  | 3.237137000  | -0.177938000 |
| C | 1.271697000  | 4.869477000  | -0.100914000 |
| H | 0.541705000  | 5.434849000  | 0.508013000  |
| H | 2.252581000  | 5.380599000  | -0.005973000 |
| H | 0.964256000  | 4.915605000  | -1.163165000 |
| C | -2.055527000 | 4.432922000  | -0.556386000 |
| H | -3.093365000 | 4.784534000  | -0.377206000 |
| H | -1.378623000 | 5.289240000  | -0.390940000 |
| H | -1.974435000 | 4.117703000  | -1.613301000 |
| C | -2.818073000 | 2.146582000  | 0.175649000  |
| H | -2.788686000 | 1.754692000  | -0.859854000 |
| H | -2.658860000 | 1.301511000  | 0.878996000  |
| H | -3.832758000 | 2.554845000  | 0.363199000  |

73

(p-H-POCOP)IrH2---CH<sub>2</sub>Cl<sub>2</sub> dihydrogen bonded, E = -2758.847255

|   |              |              |              |
|---|--------------|--------------|--------------|
| C | -0.091514000 | 1.203633000  | -3.608744000 |
| C | -0.127155000 | 1.191264000  | -2.197777000 |
| C | -0.140830000 | -0.023107000 | -1.463100000 |
| C | -0.115510000 | -1.243107000 | -2.188148000 |
| C | -0.079511000 | -1.266000000 | -3.599069000 |

|    |              |              |              |
|----|--------------|--------------|--------------|
| C  | -0.069064000 | -0.033808000 | -4.287391000 |
| H  | -0.078946000 | 2.155657000  | -4.158294000 |
| H  | -0.057937000 | -2.222141000 | -4.141128000 |
| H  | -0.042134000 | -0.038004000 | -5.388321000 |
| O  | -0.115909000 | -2.434942000 | -1.493848000 |
| O  | -0.137810000 | 2.388540000  | -1.512335000 |
| P  | -0.188769000 | -2.272292000 | 0.241737000  |
| P  | -0.173775000 | 2.235382000  | 0.225270000  |
| Ir | -0.247111000 | -0.016503000 | 0.612496000  |
| H  | 0.899171000  | -0.027611000 | 1.677224000  |
| H  | -0.800000000 | -0.033721000 | 2.155587000  |
| C  | 1.383275000  | -3.214185000 | 0.705488000  |
| C  | -1.800208000 | -3.222848000 | 0.542769000  |
| C  | 1.419015000  | 3.165568000  | 0.643978000  |
| C  | -1.768578000 | 3.204274000  | 0.555109000  |
| C  | 1.565441000  | -3.147784000 | 2.236388000  |
| H  | 2.547285000  | -3.595758000 | 2.496836000  |
| H  | 1.554746000  | -2.105844000 | 2.603908000  |
| H  | 0.784308000  | -3.709847000 | 2.779534000  |
| C  | -1.910496000 | -3.535959000 | 2.048584000  |
| H  | -1.699160000 | -2.642713000 | 2.668830000  |
| H  | -2.942601000 | -3.877535000 | 2.273017000  |
| H  | -1.217401000 | -4.344586000 | 2.349761000  |
| C  | 2.528637000  | -2.430460000 | 0.019117000  |
| H  | 2.446185000  | -2.475051000 | -1.083502000 |
| H  | 2.523623000  | -1.366001000 | 0.324959000  |
| H  | 3.498169000  | -2.881458000 | 0.315905000  |
| C  | 1.381614000  | -4.673211000 | 0.213928000  |
| H  | 2.392736000  | -5.104728000 | 0.369194000  |
| H  | 0.664577000  | -5.296955000 | 0.779643000  |
| H  | 1.142398000  | -4.740746000 | -0.864541000 |
| C  | -1.946513000 | -4.500387000 | -0.305726000 |
| H  | -1.241376000 | -5.292785000 | 0.000040000  |
| H  | -2.975091000 | -4.897229000 | -0.172943000 |
| H  | -1.794722000 | -4.287676000 | -1.380399000 |
| C  | -2.903242000 | -2.213979000 | 0.134808000  |
| H  | -2.843655000 | -1.289665000 | 0.744468000  |
| H  | -2.818130000 | -1.929851000 | -0.932481000 |
| H  | -3.899017000 | -2.678849000 | 0.291404000  |
| C  | 1.656210000  | 3.075651000  | 2.166060000  |
| H  | 1.709664000  | 2.024308000  | 2.502760000  |
| H  | 2.625933000  | 3.559709000  | 2.405841000  |
| H  | 0.870795000  | 3.591893000  | 2.748465000  |
| C  | -1.850978000 | 3.509914000  | 2.064347000  |
| H  | -2.870983000 | 3.874455000  | 2.306561000  |
| H  | -1.658682000 | 2.602863000  | 2.672105000  |
| H  | -1.133755000 | 4.297635000  | 2.364623000  |
| C  | 2.536875000  | 2.387672000  | -0.092358000 |
| H  | 2.524061000  | 1.314604000  | 0.182465000  |
| H  | 2.428287000  | 2.466197000  | -1.190638000 |
| H  | 3.519416000  | 2.816698000  | 0.193837000  |
| C  | 1.406661000  | 4.631928000  | 0.175536000  |



|    |              |              |              |
|----|--------------|--------------|--------------|
| H  | 0.716752000  | 5.251174000  | 0.778798000  |
| H  | 2.425903000  | 5.055228000  | 0.296408000  |
| H  | 1.125301000  | 4.716974000  | -0.891367000 |
| C  | -1.916389000 | 4.487888000  | -0.283910000 |
| H  | -2.942460000 | 4.887768000  | -0.141540000 |
| H  | -1.206355000 | 5.276044000  | 0.021088000  |
| H  | -1.773570000 | 4.280492000  | -1.360869000 |
| C  | -2.888924000 | 2.208947000  | 0.161205000  |
| H  | -2.825907000 | 1.932208000  | -0.909493000 |
| H  | -2.826499000 | 1.279536000  | 0.762954000  |
| H  | -3.877113000 | 2.681911000  | 0.339917000  |
| H  | 0.014976000  | 0.605209000  | 3.836427000  |
| C  | 0.465090000  | 0.219377000  | 4.769431000  |
| H  | 0.349707000  | 0.902167000  | 5.627927000  |
| Cl | -0.359231000 | -1.324519000 | 5.162188000  |
| Cl | 2.224736000  | 0.008000000  | 4.462945000  |

73

(p-H-POCOP)IrH2---CH<sub>2</sub>Cl<sub>2</sub> halogen bonded, E = -2758.843023

|    |              |              |              |
|----|--------------|--------------|--------------|
| C  | -0.222321000 | 1.115707000  | -3.721580000 |
| C  | -0.197932000 | 1.188947000  | -2.311803000 |
| C  | -0.183362000 | 0.019317000  | -1.508240000 |
| C  | -0.188802000 | -1.243439000 | -2.155502000 |
| C  | -0.213336000 | -1.350388000 | -3.563456000 |
| C  | -0.230584000 | -0.161149000 | -4.323122000 |
| H  | -0.232579000 | 2.032047000  | -4.328737000 |
| H  | -0.215841000 | -2.336810000 | -4.048649000 |
| H  | -0.249589000 | -0.231648000 | -5.422051000 |
| O  | -0.162277000 | -2.390376000 | -1.392675000 |
| O  | -0.182429000 | 2.425043000  | -1.700611000 |
| P  | -0.089607000 | -2.122581000 | 0.333913000  |
| P  | -0.168153000 | 2.373686000  | 0.045529000  |
| Ir | -0.156930000 | 0.151903000  | 0.564854000  |
| H  | 0.789144000  | 0.249259000  | 1.837153000  |
| H  | -0.808484000 | 0.233982000  | 2.042648000  |
| C  | 1.556715000  | -2.984886000 | 0.700884000  |
| C  | -1.624069000 | -3.115800000 | 0.833294000  |
| C  | 1.423849000  | 3.344323000  | 0.370495000  |
| C  | -1.765926000 | 3.340518000  | 0.364323000  |
| C  | 1.890375000  | -2.794231000 | 2.195474000  |
| H  | 2.907254000  | -3.196958000 | 2.386520000  |
| H  | 1.878491000  | -1.724756000 | 2.476106000  |
| H  | 1.187191000  | -3.324060000 | 2.862325000  |
| C  | -1.578857000 | -3.347201000 | 2.356664000  |
| H  | -1.361103000 | -2.413960000 | 2.910776000  |
| H  | -2.565628000 | -3.726644000 | 2.695389000  |
| H  | -0.818335000 | -4.100231000 | 2.636624000  |
| C  | 2.597213000  | -2.219238000 | -0.152694000 |
| H  | 2.417348000  | -2.359531000 | -1.235462000 |
| H  | 2.567949000  | -1.133335000 | 0.066517000  |
| H  | 3.610100000  | -2.604779000 | 0.086255000  |
| C  | 1.567081000  | -4.476453000 | 0.321458000  |
| H  | 2.605888000  | -4.860253000 | 0.402820000  |

|    |              |              |              |
|----|--------------|--------------|--------------|
| H  | 0.937414000  | -5.078865000 | 1.002626000  |
| H  | 1.224609000  | -4.635388000 | -0.718905000 |
| C  | -1.786424000 | -4.445472000 | 0.071503000  |
| H  | -1.022694000 | -5.190502000 | 0.354055000  |
| H  | -2.780385000 | -4.874230000 | 0.318984000  |
| H  | -1.740607000 | -4.289435000 | -1.022485000 |
| C  | -2.808265000 | -2.182841000 | 0.477726000  |
| H  | -2.734809000 | -1.219580000 | 1.019820000  |
| H  | -2.836658000 | -1.963130000 | -0.607712000 |
| H  | -3.759748000 | -2.682670000 | 0.755930000  |
| C  | 1.674762000  | 3.369685000  | 1.894239000  |
| H  | 1.651648000  | 2.348556000  | 2.321569000  |
| H  | 2.677293000  | 3.806407000  | 2.084805000  |
| H  | 0.931569000  | 3.988511000  | 2.430470000  |
| C  | -1.831654000 | 3.691397000  | 1.864689000  |
| H  | -2.850898000 | 4.057652000  | 2.107749000  |
| H  | -1.624796000 | 2.805169000  | 2.497610000  |
| H  | -1.116084000 | 4.492443000  | 2.131571000  |
| C  | 2.532423000  | 2.509595000  | -0.316634000 |
| H  | 2.526427000  | 1.463783000  | 0.049798000  |
| H  | 2.401770000  | 2.491725000  | -1.415381000 |
| H  | 3.518736000  | 2.964256000  | -0.088505000 |
| C  | 1.410807000  | 4.770524000  | -0.208337000 |
| H  | 0.732471000  | 5.437909000  | 0.355117000  |
| H  | 2.433188000  | 5.197464000  | -0.135460000 |
| H  | 1.113658000  | 4.774987000  | -1.274423000 |
| C  | -1.926192000 | 4.598390000  | -0.510773000 |
| H  | -2.955682000 | 4.993131000  | -0.379240000 |
| H  | -1.223354000 | 5.401403000  | -0.228193000 |
| H  | -1.782223000 | 4.362388000  | -1.581788000 |
| C  | -2.887850000 | 2.331440000  | 0.013519000  |
| H  | -2.846346000 | 2.037685000  | -1.053538000 |
| H  | -2.802977000 | 1.411140000  | 0.624957000  |
| H  | -3.873715000 | 2.804048000  | 0.205945000  |
| H  | -0.498253000 | -1.147807000 | 6.827525000  |
| C  | 0.288381000  | -1.458461000 | 6.118881000  |
| H  | 1.299633000  | -1.279797000 | 6.522361000  |
| Cl | 0.109490000  | -3.227543000 | 5.839825000  |
| Cl | 0.105729000  | -0.497814000 | 4.613780000  |

74

(p-MeOOC-POCOP)IrH<sub>2</sub> S CH<sub>2</sub>Cl<sub>2</sub>, E = -2027.292362

|   |              |              |              |
|---|--------------|--------------|--------------|
| C | -0.352971000 | 1.198525000  | -3.618662000 |
| C | -0.230699000 | 1.190920000  | -2.216323000 |
| C | -0.172322000 | -0.023048000 | -1.483720000 |
| C | -0.238909000 | -1.245687000 | -2.200526000 |
| C | -0.359620000 | -1.274661000 | -3.604028000 |
| C | -0.416147000 | -0.041602000 | -4.300003000 |
| H | -0.398979000 | 2.137689000  | -4.184694000 |
| H | -0.408769000 | -2.228096000 | -4.143234000 |
| O | -0.184293000 | -2.433624000 | -1.509535000 |
| O | -0.164849000 | 2.387349000  | -1.541526000 |
| P | -0.028991000 | -2.269467000 | 0.223811000  |

|    |              |              |              |
|----|--------------|--------------|--------------|
| P  | -0.018571000 | 2.244597000  | 0.194350000  |
| Ir | 0.004988000  | -0.010193000 | 0.589071000  |
| H  | 0.931253000  | 0.016292000  | 1.898055000  |
| H  | -0.643584000 | -0.016776000 | 2.060305000  |
| C  | 1.601193000  | -3.201113000 | 0.464840000  |
| C  | -1.580630000 | -3.229687000 | 0.730780000  |
| C  | 1.600904000  | 3.200935000  | 0.414290000  |
| C  | -1.581552000 | 3.185953000  | 0.698849000  |
| C  | 1.984079000  | -3.132297000 | 1.959133000  |
| H  | 2.999710000  | -3.561170000 | 2.087536000  |
| H  | 2.000643000  | -2.085649000 | 2.319700000  |
| H  | 1.291620000  | -3.712215000 | 2.597024000  |
| C  | -1.518384000 | -3.491891000 | 2.249339000  |
| H  | -1.279733000 | -2.567993000 | 2.813311000  |
| H  | -2.507978000 | -3.857662000 | 2.593924000  |
| H  | -0.768955000 | -4.265794000 | 2.502865000  |
| C  | 2.631996000  | -2.395099000 | -0.363520000 |
| H  | 2.410778000  | -2.445897000 | -1.446609000 |
| H  | 2.640722000  | -1.329098000 | -0.059575000 |
| H  | 3.641798000  | -2.822422000 | -0.193101000 |
| C  | 1.561965000  | -4.659292000 | -0.026029000 |
| H  | 2.594614000  | -5.067084000 | -0.019849000 |
| H  | 0.949179000  | -5.300053000 | 0.634865000  |
| H  | 1.171973000  | -4.732197000 | -1.059086000 |
| C  | -1.787266000 | -4.541000000 | -0.052033000 |
| H  | -1.049082000 | -5.315362000 | 0.219618000  |
| H  | -2.794940000 | -4.940375000 | 0.188222000  |
| H  | -1.736382000 | -4.369470000 | -1.143500000 |
| C  | -2.745967000 | -2.260159000 | 0.411912000  |
| H  | -2.636788000 | -1.305564000 | 0.963019000  |
| H  | -2.792184000 | -2.027489000 | -0.669912000 |
| H  | -3.703615000 | -2.738831000 | 0.704948000  |
| C  | 1.818224000  | 3.454979000  | 1.919942000  |
| H  | 1.686153000  | 2.527912000  | 2.512881000  |
| H  | 2.854454000  | 3.819191000  | 2.079193000  |
| H  | 1.128750000  | 4.227129000  | 2.311120000  |
| C  | -1.689151000 | 3.160727000  | 2.238741000  |
| H  | -2.669238000 | 3.588861000  | 2.535465000  |
| H  | -1.630319000 | 2.125385000  | 2.626792000  |
| H  | -0.898993000 | 3.763280000  | 2.723959000  |
| C  | 2.687011000  | 2.232210000  | -0.116703000 |
| H  | 2.677608000  | 1.274228000  | 0.439080000  |
| H  | 2.536111000  | 2.006616000  | -1.190390000 |
| H  | 3.682668000  | 2.708461000  | 0.001062000  |
| C  | 1.662585000  | 4.515849000  | -0.386829000 |
| H  | 0.991599000  | 5.290755000  | 0.022724000  |
| H  | 2.698991000  | 4.910838000  | -0.337845000 |
| H  | 1.407281000  | 4.350799000  | -1.450303000 |
| C  | -1.639013000 | 4.628811000  | 0.165919000  |
| H  | -2.657809000 | 5.034207000  | 0.340303000  |
| H  | -0.925453000 | 5.291192000  | 0.689966000  |
| H  | -1.435732000 | 4.670867000  | -0.921023000 |

|   |              |              |              |
|---|--------------|--------------|--------------|
| C | -2.740208000 | 2.356298000  | 0.091979000  |
| H | -2.714629000 | 2.372585000  | -1.014261000 |
| H | -2.691180000 | 1.300281000  | 0.425709000  |
| H | -3.705413000 | 2.790748000  | 0.425120000  |
| C | -0.545219000 | 0.007272000  | -5.792948000 |
| O | -0.597666000 | 1.039901000  | -6.455066000 |
| O | -0.599405000 | -1.229924000 | -6.350308000 |
| C | -0.723207000 | -1.269383000 | -7.786640000 |
| H | -1.652225000 | -0.760788000 | -8.113159000 |
| H | 0.144041000  | -0.774468000 | -8.267597000 |
| H | -0.754507000 | -2.339440000 | -8.057221000 |

74

(p-MeOOC-POCOP)IrH<sub>2</sub> NS CH<sub>2</sub>Cl<sub>2</sub>, E = -2027.292362

|    |              |              |              |
|----|--------------|--------------|--------------|
| C  | -0.198390000 | 1.091966000  | -3.709469000 |
| C  | -0.152498000 | 1.170682000  | -2.307715000 |
| C  | -0.108479000 | 0.012592000  | -1.489402000 |
| C  | -0.104903000 | -1.248304000 | -2.139358000 |
| C  | -0.149902000 | -1.370728000 | -3.539267000 |
| C  | -0.197048000 | -0.187645000 | -4.321569000 |
| H  | -0.233015000 | 1.995655000  | -4.331823000 |
| H  | -0.146521000 | -2.358964000 | -4.014925000 |
| O  | -0.052790000 | -2.393487000 | -1.363532000 |
| O  | -0.147265000 | 2.413368000  | -1.698864000 |
| P  | -0.019794000 | -2.122267000 | 0.350070000  |
| P  | -0.102866000 | 2.384809000  | 0.035830000  |
| Ir | -0.071706000 | 0.157781000  | 0.578641000  |
| H  | 1.452265000  | 0.201193000  | 0.783733000  |
| H  | -0.084449000 | 0.274436000  | 2.251361000  |
| C  | 1.550280000  | -3.072976000 | 0.790880000  |
| C  | -1.635013000 | -2.987350000 | 0.823818000  |
| C  | 1.432571000  | 3.443229000  | 0.329217000  |
| C  | -1.747765000 | 3.249006000  | 0.394727000  |
| C  | 1.874204000  | -2.804273000 | 2.276638000  |
| H  | 2.845900000  | -3.280874000 | 2.522260000  |
| H  | 1.954782000  | -1.718691000 | 2.477719000  |
| H  | 1.110194000  | -3.226327000 | 2.955487000  |
| C  | -1.634550000 | -3.249396000 | 2.343025000  |
| H  | -1.364175000 | -2.337113000 | 2.911465000  |
| H  | -2.652675000 | -3.560369000 | 2.656955000  |
| H  | -0.935469000 | -4.061000000 | 2.620812000  |
| C  | 2.664156000  | -2.469897000 | -0.098055000 |
| H  | 2.477351000  | -2.665818000 | -1.170442000 |
| H  | 2.754710000  | -1.375556000 | 0.045667000  |
| H  | 3.631881000  | -2.935364000 | 0.180625000  |
| C  | 1.429516000  | -4.583323000 | 0.514649000  |
| H  | 2.421335000  | -5.056865000 | 0.670486000  |
| H  | 0.715283000  | -5.072975000 | 1.202731000  |
| H  | 1.116646000  | -4.782078000 | -0.528252000 |
| C  | -1.913360000 | -4.277517000 | 0.030043000  |
| H  | -1.214097000 | -5.091371000 | 0.289882000  |
| H  | -2.939703000 | -4.626172000 | 0.270611000  |
| H  | -1.855724000 | -4.097267000 | -1.059538000 |

|   |              |              |              |
|---|--------------|--------------|--------------|
| C | -2.713754000 | -1.930635000 | 0.476901000  |
| H | -2.567097000 | -1.002079000 | 1.069342000  |
| H | -2.704207000 | -1.670769000 | -0.599609000 |
| H | -3.718545000 | -2.329719000 | 0.726978000  |
| C | 1.769782000  | 3.395558000  | 1.835389000  |
| H | 1.899009000  | 2.352478000  | 2.182882000  |
| H | 2.719785000  | 3.943338000  | 2.006070000  |
| H | 0.988601000  | 3.872998000  | 2.455473000  |
| C | -1.753501000 | 3.727137000  | 1.860371000  |
| H | -2.781780000 | 4.044083000  | 2.132377000  |
| H | -1.450278000 | 2.916967000  | 2.553305000  |
| H | -1.083419000 | 4.594408000  | 2.013627000  |
| C | 2.565655000  | 2.763110000  | -0.475969000 |
| H | 2.693871000  | 1.702105000  | -0.185581000 |
| H | 2.371260000  | 2.804944000  | -1.563978000 |
| H | 3.517122000  | 3.294603000  | -0.268479000 |
| C | 1.256095000  | 4.895348000  | -0.153190000 |
| H | 0.527451000  | 5.450963000  | 0.466342000  |
| H | 2.230773000  | 5.420577000  | -0.073404000 |
| H | 0.932519000  | 4.936019000  | -1.210850000 |
| C | -2.076769000 | 4.400721000  | -0.573442000 |
| H | -3.114614000 | 4.742261000  | -0.376104000 |
| H | -1.407412000 | 5.268239000  | -0.438952000 |
| H | -2.016220000 | 4.068359000  | -1.626442000 |
| C | -2.787233000 | 2.114717000  | 0.212180000  |
| H | -2.774175000 | 1.705978000  | -0.817046000 |
| H | -2.600925000 | 1.285415000  | 0.928025000  |
| H | -3.804783000 | 2.508027000  | 0.415107000  |
| C | -0.247222000 | -0.234084000 | -5.812531000 |
| O | -0.288734000 | 0.752050000  | -6.545703000 |
| O | -0.242619000 | -1.507149000 | -6.296218000 |
| C | -0.289211000 | -1.634404000 | -7.730537000 |
| H | -1.212344000 | -1.173958000 | -8.136456000 |
| H | 0.588456000  | -1.144106000 | -8.197708000 |
| H | -0.278233000 | -2.719035000 | -7.938410000 |

79

(p-MeOOC-POCOP)IrH<sub>2</sub>---CH<sub>2</sub>Cl<sub>2</sub> dihydrogen bonded, E = -2986.518733

|    |              |              |              |
|----|--------------|--------------|--------------|
| C  | -0.011631000 | 1.180344000  | -3.601208000 |
| C  | -0.072258000 | 1.173499000  | -2.197564000 |
| C  | -0.108864000 | -0.033658000 | -1.452305000 |
| C  | -0.093186000 | -1.253626000 | -2.176603000 |
| C  | -0.032610000 | -1.289444000 | -3.581161000 |
| C  | 0.009189000  | -0.060150000 | -4.288753000 |
| H  | 0.019651000  | 2.120108000  | -4.167805000 |
| H  | -0.017839000 | -2.246426000 | -4.116702000 |
| O  | -0.137734000 | -2.443558000 | -1.473359000 |
| O  | -0.096547000 | 2.375660000  | -1.514625000 |
| P  | -0.217007000 | -2.278080000 | 0.254881000  |
| P  | -0.190338000 | 2.237955000  | 0.215514000  |
| Ir | -0.267591000 | -0.015055000 | 0.616250000  |
| H  | 1.183680000  | -0.020674000 | 1.135274000  |
| H  | -0.538336000 | -0.022765000 | 2.259168000  |

|   |              |              |              |
|---|--------------|--------------|--------------|
| C | 1.315886000  | -3.272096000 | 0.728988000  |
| C | -1.864300000 | -3.153679000 | 0.568768000  |
| C | 1.350461000  | 3.222678000  | 0.685599000  |
| C | -1.830691000 | 3.138455000  | 0.497542000  |
| C | 1.522707000  | -3.155862000 | 2.252793000  |
| H | 2.478538000  | -3.651947000 | 2.521922000  |
| H | 1.581764000  | -2.100938000 | 2.574460000  |
| H | 0.715509000  | -3.643753000 | 2.827960000  |
| C | -1.961704000 | -3.499129000 | 2.068648000  |
| H | -1.692185000 | -2.633943000 | 2.706762000  |
| H | -3.005884000 | -3.791582000 | 2.305467000  |
| H | -1.306423000 | -4.350113000 | 2.335201000  |
| C | 2.492990000  | -2.584660000 | -0.004169000 |
| H | 2.389003000  | -2.661286000 | -1.102845000 |
| H | 2.570361000  | -1.513360000 | 0.264808000  |
| H | 3.436999000  | -3.085479000 | 0.294019000  |
| C | 1.222293000  | -4.745821000 | 0.291798000  |
| H | 2.204052000  | -5.233646000 | 0.466354000  |
| H | 0.466548000  | -5.301579000 | 0.877742000  |
| H | 0.981046000  | -4.838005000 | -0.784459000 |
| C | -2.097613000 | -4.395424000 | -0.311783000 |
| H | -1.420171000 | -5.228127000 | -0.053671000 |
| H | -3.138896000 | -4.748629000 | -0.157394000 |
| H | -1.969049000 | -4.155685000 | -1.383796000 |
| C | -2.912492000 | -2.069756000 | 0.211274000  |
| H | -2.800564000 | -1.177802000 | 0.864057000  |
| H | -2.827235000 | -1.749354000 | -0.845666000 |
| H | -3.933633000 | -2.475266000 | 0.367182000  |
| C | 1.575345000  | 3.077834000  | 2.205412000  |
| H | 1.719420000  | 2.019091000  | 2.486759000  |
| H | 2.494741000  | 3.632867000  | 2.485398000  |
| H | 0.738703000  | 3.488786000  | 2.800121000  |
| C | -1.947288000 | 3.493777000  | 1.993322000  |
| H | -2.984009000 | 3.827517000  | 2.206958000  |
| H | -1.729964000 | 2.616667000  | 2.635503000  |
| H | -1.264717000 | 4.318332000  | 2.274442000  |
| C | 2.519235000  | 2.547457000  | -0.071478000 |
| H | 2.576464000  | 1.464001000  | 0.151014000  |
| H | 2.419727000  | 2.673053000  | -1.165809000 |
| H | 3.470613000  | 3.018313000  | 0.251061000  |
| C | 1.255290000  | 4.704731000  | 0.278382000  |
| H | 0.507043000  | 5.251494000  | 0.882221000  |
| H | 2.240213000  | 5.186969000  | 0.450530000  |
| H | 1.003113000  | 4.816977000  | -0.793368000 |
| C | -2.036022000 | 4.377673000  | -0.393484000 |
| H | -3.079469000 | 4.735433000  | -0.266899000 |
| H | -1.362464000 | 5.208794000  | -0.121080000 |
| H | -1.881678000 | 4.132999000  | -1.460950000 |
| C | -2.887004000 | 2.065347000  | 0.131374000  |
| H | -2.794752000 | 1.742361000  | -0.924031000 |
| H | -2.791298000 | 1.172837000  | 0.786109000  |
| H | -3.905060000 | 2.482149000  | 0.277262000  |

|    |              |              |              |
|----|--------------|--------------|--------------|
| H  | 0.356120000  | 0.456503000  | 3.795414000  |
| C  | 0.898750000  | 0.158845000  | 4.713704000  |
| H  | 0.850628000  | 0.910485000  | 5.519598000  |
| Cl | 0.141371000  | -1.355062000 | 5.310002000  |
| Cl | 2.627389000  | -0.056465000 | 4.260772000  |
| C  | 0.072899000  | -0.015669000 | -5.779923000 |
| O  | 0.107647000  | 1.013516000  | -6.451429000 |
| O  | 0.089497000  | -1.256900000 | -6.339233000 |
| C  | 0.150255000  | -1.296983000 | -7.778210000 |
| H  | -0.731904000 | -0.794097000 | -8.223004000 |
| H  | 1.068622000  | -0.797683000 | -8.147245000 |
| H  | 0.159483000  | -2.367199000 | -8.050719000 |

79

(p-MeOOC-POCOP)IrH2---CH<sub>2</sub>Cl<sub>2</sub> halogen bonded, E = -2986.513997

|    |              |              |              |
|----|--------------|--------------|--------------|
| C  | -0.197508000 | 1.088701000  | -3.716977000 |
| C  | -0.153296000 | 1.173220000  | -2.315435000 |
| C  | -0.110937000 | 0.017882000  | -1.493184000 |
| C  | -0.107154000 | -1.246423000 | -2.135870000 |
| C  | -0.150309000 | -1.374345000 | -3.535864000 |
| C  | -0.196387000 | -0.194179000 | -4.323151000 |
| H  | -0.230569000 | 1.989258000  | -4.344008000 |
| H  | -0.146208000 | -2.364189000 | -4.008298000 |
| O  | -0.054932000 | -2.385948000 | -1.354580000 |
| O  | -0.146432000 | 2.418694000  | -1.710603000 |
| P  | -0.025293000 | -2.109105000 | 0.363485000  |
| P  | -0.100099000 | 2.391269000  | 0.025699000  |
| Ir | -0.074187000 | 0.173336000  | 0.577154000  |
| H  | 1.436669000  | 0.215780000  | 0.869530000  |
| H  | -0.100624000 | 0.317825000  | 2.235940000  |
| C  | 1.546256000  | -3.062040000 | 0.798103000  |
| C  | -1.637261000 | -2.989368000 | 0.829519000  |
| C  | 1.435486000  | 3.447975000  | 0.320290000  |
| C  | -1.745555000 | 3.252312000  | 0.386513000  |
| C  | 1.873103000  | -2.806916000 | 2.284745000  |
| H  | 2.849281000  | -3.280262000 | 2.520121000  |
| H  | 1.945368000  | -1.724081000 | 2.498829000  |
| H  | 1.117088000  | -3.232195000 | 2.968400000  |
| C  | -1.619104000 | -3.312281000 | 2.335708000  |
| H  | -1.343086000 | -2.430771000 | 2.944483000  |
| H  | -2.633041000 | -3.640427000 | 2.646765000  |
| H  | -0.916285000 | -4.132321000 | 2.574563000  |
| C  | 2.658658000  | -2.449142000 | -0.086096000 |
| H  | 2.472157000  | -2.635140000 | -1.160357000 |
| H  | 2.745520000  | -1.355902000 | 0.068002000  |
| H  | 3.627663000  | -2.915007000 | 0.187907000  |
| C  | 1.427088000  | -4.569539000 | 0.506626000  |
| H  | 2.417440000  | -5.045381000 | 0.665621000  |
| H  | 0.707136000  | -5.065274000 | 1.184285000  |
| H  | 1.122153000  | -4.758091000 | -0.540546000 |
| C  | -1.926088000 | -4.248310000 | -0.009665000 |
| H  | -1.211195000 | -5.064329000 | 0.196165000  |
| H  | -2.941243000 | -4.617856000 | 0.247339000  |

|    |              |              |              |
|----|--------------|--------------|--------------|
| H  | -1.902297000 | -4.024608000 | -1.092300000 |
| C  | -2.720111000 | -1.920188000 | 0.539132000  |
| H  | -2.563394000 | -1.018347000 | 1.168548000  |
| H  | -2.722469000 | -1.615010000 | -0.525819000 |
| H  | -3.722449000 | -2.330107000 | 0.782210000  |
| C  | 1.766658000  | 3.403781000  | 1.828120000  |
| H  | 1.874148000  | 2.360810000  | 2.183152000  |
| H  | 2.725343000  | 3.936173000  | 1.999285000  |
| H  | 0.991156000  | 3.899021000  | 2.441413000  |
| C  | -1.756732000 | 3.703700000  | 1.860667000  |
| H  | -2.785846000 | 4.014821000  | 2.136520000  |
| H  | -1.452961000 | 2.879944000  | 2.537282000  |
| H  | -1.087831000 | 4.568662000  | 2.031412000  |
| C  | 2.568121000  | 2.758844000  | -0.478087000 |
| H  | 2.687459000  | 1.697995000  | -0.183412000 |
| H  | 2.377207000  | 2.797606000  | -1.566880000 |
| H  | 3.522017000  | 3.285702000  | -0.269679000 |
| C  | 1.265959000  | 4.898715000  | -0.167863000 |
| H  | 0.538334000  | 5.459006000  | 0.448641000  |
| H  | 2.242416000  | 5.420933000  | -0.089085000 |
| H  | 0.943368000  | 4.936554000  | -1.225975000 |
| C  | -2.070502000 | 4.419304000  | -0.563928000 |
| H  | -3.112852000 | 4.751807000  | -0.374484000 |
| H  | -1.408205000 | 5.288293000  | -0.404993000 |
| H  | -1.994195000 | 4.106189000  | -1.621921000 |
| C  | -2.782246000 | 2.119111000  | 0.181566000  |
| H  | -2.769675000 | 1.732717000  | -0.856164000 |
| H  | -2.589512000 | 1.274413000  | 0.877799000  |
| H  | -3.801069000 | 2.503352000  | 0.395615000  |
| H  | -0.939608000 | -1.403377000 | 6.797620000  |
| C  | -0.052584000 | -1.667748000 | 6.196903000  |
| H  | 0.886708000  | -1.461127000 | 6.737783000  |
| Cl | -0.120509000 | -3.437927000 | 5.869092000  |
| Cl | -0.068566000 | -0.685202000 | 4.693068000  |
| C  | -0.245608000 | -0.246967000 | -5.813631000 |
| O  | -0.286188000 | 0.735786000  | -6.551667000 |
| O  | -0.241512000 | -1.522272000 | -6.292411000 |
| C  | -0.287596000 | -1.654967000 | -7.726087000 |
| H  | -1.210613000 | -1.196225000 | -8.134282000 |
| H  | 0.590088000  | -1.166381000 | -8.195075000 |
| H  | -0.276461000 | -2.740386000 | -7.929929000 |

72

(p-MeO-POCOP)IrH<sub>2</sub> S CH<sub>2</sub>Cl<sub>2</sub>, E = -1914.035706

|   |              |              |              |
|---|--------------|--------------|--------------|
| C | -0.358049000 | 1.196259000  | -3.610250000 |
| C | -0.235143000 | 1.186116000  | -2.211990000 |
| C | -0.171398000 | -0.024910000 | -1.466778000 |
| C | -0.234957000 | -1.241815000 | -2.192470000 |
| C | -0.356178000 | -1.281639000 | -3.597406000 |
| C | -0.417324000 | -0.048284000 | -4.293698000 |
| H | -0.407753000 | 2.133082000  | -4.180834000 |
| H | -0.400619000 | -2.247305000 | -4.113296000 |
| O | -0.177412000 | -2.434525000 | -1.507898000 |



|    |              |              |              |
|----|--------------|--------------|--------------|
| O  | -0.172734000 | 2.385784000  | -1.539508000 |
| P  | -0.026543000 | -2.267533000 | 0.225837000  |
| P  | -0.020174000 | 2.240429000  | 0.194504000  |
| Ir | 0.007444000  | -0.011286000 | 0.594011000  |
| H  | 0.964079000  | 0.012513000  | 1.884014000  |
| H  | -0.687050000 | -0.013924000 | 2.045438000  |
| C  | 1.601390000  | -3.205159000 | 0.469518000  |
| C  | -1.579247000 | -3.231350000 | 0.728164000  |
| C  | 1.599123000  | 3.201406000  | 0.409256000  |
| C  | -1.579742000 | 3.187135000  | 0.704843000  |
| C  | 1.979665000  | -3.144012000 | 1.965174000  |
| H  | 2.995915000  | -3.571181000 | 2.095231000  |
| H  | 1.991606000  | -2.099114000 | 2.330974000  |
| H  | 1.286268000  | -3.728897000 | 2.597632000  |
| C  | -1.523529000 | -3.492338000 | 2.247126000  |
| H  | -1.288278000 | -2.567258000 | 2.810542000  |
| H  | -2.513934000 | -3.859307000 | 2.588388000  |
| H  | -0.773895000 | -4.264720000 | 2.504903000  |
| C  | 2.637841000  | -2.398817000 | -0.351354000 |
| H  | 2.417970000  | -2.441863000 | -1.435099000 |
| H  | 2.649532000  | -1.334775000 | -0.041615000 |
| H  | 3.645445000  | -2.831909000 | -0.181663000 |
| C  | 1.562343000  | -4.661292000 | -0.027814000 |
| H  | 2.594559000  | -5.070409000 | -0.021169000 |
| H  | 0.947534000  | -5.304698000 | 0.628614000  |
| H  | 1.174351000  | -4.729237000 | -1.061955000 |
| C  | -1.781451000 | -4.544033000 | -0.053708000 |
| H  | -1.044704000 | -5.317970000 | 0.222998000  |
| H  | -2.790342000 | -4.943700000 | 0.181286000  |
| H  | -1.724215000 | -4.373926000 | -1.145093000 |
| C  | -2.746273000 | -2.265752000 | 0.404118000  |
| H  | -2.641936000 | -1.310636000 | 0.954715000  |
| H  | -2.787222000 | -2.032751000 | -0.677824000 |
| H  | -3.703737000 | -2.747832000 | 0.692607000  |
| C  | 1.819127000  | 3.463204000  | 1.913078000  |
| H  | 1.687306000  | 2.538799000  | 2.510212000  |
| H  | 2.855635000  | 3.828117000  | 2.069643000  |
| H  | 1.130225000  | 4.237283000  | 2.301633000  |
| C  | -1.684241000 | 3.162825000  | 2.244808000  |
| H  | -2.663966000 | 3.590163000  | 2.544264000  |
| H  | -1.622860000 | 2.127490000  | 2.632458000  |
| H  | -0.893285000 | 3.766019000  | 2.727970000  |
| C  | 2.687022000  | 2.233153000  | -0.118528000 |
| H  | 2.681281000  | 1.278463000  | 0.442528000  |
| H  | 2.532968000  | 1.999918000  | -1.190129000 |
| H  | 3.681586000  | 2.713410000  | -0.006612000 |
| C  | 1.659206000  | 4.512746000  | -0.398022000 |
| H  | 0.988964000  | 5.289607000  | 0.008962000  |
| H  | 2.695598000  | 4.908575000  | -0.353400000 |
| H  | 1.401334000  | 4.342309000  | -1.460025000 |
| C  | -1.635795000 | 4.630305000  | 0.172226000  |
| H  | -2.653256000 | 5.038300000  | 0.348973000  |

|   |              |              |              |
|---|--------------|--------------|--------------|
| H | -0.919567000 | 5.291402000  | 0.694320000  |
| H | -1.434839000 | 4.671905000  | -0.915179000 |
| C | -2.743359000 | 2.361964000  | 0.101683000  |
| H | -2.718600000 | 2.375887000  | -1.004637000 |
| H | -2.697538000 | 1.306366000  | 0.436280000  |
| H | -3.706166000 | 2.801673000  | 0.435308000  |
| O | -0.535660000 | 0.043015000  | -5.650932000 |
| C | -0.601401000 | -1.162796000 | -6.416248000 |
| H | 0.317648000  | -1.774861000 | -6.291623000 |
| H | -1.485098000 | -1.775481000 | -6.136033000 |
| H | -0.692664000 | -0.850686000 | -7.472832000 |

72

(p-MeO-POCOP)IrH<sub>2</sub> NS CH<sub>2</sub>Cl<sub>2</sub>, E = -1914.033484

|    |              |              |              |
|----|--------------|--------------|--------------|
| Ir | 0.780223000  | -0.940486000 | -0.013040000 |
| P  | 2.301101000  | 0.765977000  | 0.016980000  |
| P  | -1.220608000 | -2.045219000 | 0.007148000  |
| O  | 1.338967000  | 2.223765000  | 0.031755000  |
| C  | 4.100651000  | 2.338384000  | 1.624727000  |
| O  | -2.428193000 | -0.781330000 | 0.008234000  |
| C  | 3.780738000  | 2.551449000  | -1.707454000 |
| C  | -3.167386000 | -3.437272000 | 1.611292000  |
| C  | -0.881712000 | 3.122956000  | 0.026014000  |
| C  | -1.034045000 | -4.286905000 | -1.657825000 |
| C  | -2.820246000 | 1.579569000  | 0.011221000  |
| C  | -0.723740000 | -4.084509000 | 1.854911000  |
| C  | -3.282098000 | -3.097828000 | -1.722253000 |
| C  | -1.916297000 | 0.495697000  | 0.005422000  |
| C  | 3.278068000  | 1.037349000  | 1.615707000  |
| C  | -2.282536000 | 2.890329000  | 0.020890000  |
| C  | -1.534919000 | -1.855494000 | 2.711684000  |
| C  | -0.510394000 | 0.677228000  | 0.004697000  |
| C  | 4.185842000  | -0.189815000 | 1.847732000  |
| C  | 2.256409000  | 0.815276000  | -2.704669000 |
| C  | -1.715158000 | -2.926945000 | 1.608239000  |
| C  | 4.441826000  | 0.095543000  | -1.656512000 |
| C  | -0.021108000 | 2.013222000  | 0.018730000  |
| C  | -1.757013000 | -2.926755000 | -1.582935000 |
| C  | -1.246229000 | -1.999989000 | -2.714364000 |
| C  | 3.276002000  | 1.101560000  | -1.574017000 |
| C  | 2.198807000  | 1.092132000  | 2.724799000  |
| H  | 4.972853000  | 2.279240000  | 0.947347000  |
| H  | 3.484289000  | 3.212273000  | 1.339914000  |
| H  | 4.488463000  | 2.511267000  | 2.650696000  |
| H  | 2.960247000  | 3.276998000  | -1.553566000 |
| H  | 4.594667000  | 2.782600000  | -0.998519000 |
| H  | 4.180904000  | 2.693678000  | -2.733442000 |
| H  | -3.878952000 | -2.642778000 | 1.316097000  |
| H  | -3.301308000 | -4.305853000 | 0.939945000  |
| H  | -3.429191000 | -3.768651000 | 2.638221000  |
| H  | -0.500415000 | 4.152520000  | 0.036621000  |
| H  | 0.052364000  | -4.180136000 | -1.465689000 |
| H  | -1.452010000 | -5.016072000 | -0.937598000 |

|   |              |              |              |
|---|--------------|--------------|--------------|
| H | -1.163022000 | -4.710534000 | -2.675677000 |
| H | -3.898945000 | 1.386605000  | 0.012290000  |
| H | 0.323252000  | -3.725232000 | 1.835722000  |
| H | -0.924943000 | -4.521054000 | 2.855476000  |
| H | -0.829416000 | -4.893362000 | 1.108347000  |
| H | -3.691096000 | -3.835375000 | -1.010103000 |
| H | -3.807840000 | -2.135661000 | -1.576735000 |
| H | -3.505124000 | -3.463165000 | -2.746841000 |
| H | -0.509881000 | -1.435174000 | 2.693988000  |
| H | -2.252293000 | -1.022292000 | 2.586182000  |
| H | -1.713606000 | -2.325490000 | 3.701072000  |
| H | 4.994769000  | -0.260543000 | 1.097144000  |
| H | 4.660195000  | -0.100389000 | 2.847326000  |
| H | 3.601370000  | -1.129673000 | 1.822093000  |
| H | 1.388130000  | 1.500460000  | -2.647788000 |
| H | 2.753398000  | 0.963934000  | -3.686191000 |
| H | 1.875442000  | -0.223320000 | -2.646547000 |
| H | 4.096833000  | -0.941370000 | -1.470788000 |
| H | 4.883024000  | 0.133884000  | -2.674385000 |
| H | 5.245762000  | 0.336751000  | -0.934923000 |
| H | -0.148585000 | -1.863434000 | -2.654664000 |
| H | -1.501769000 | -2.452308000 | -3.695478000 |
| H | -1.717690000 | -0.999326000 | -2.659744000 |
| H | 1.545378000  | 1.977705000  | 2.609096000  |
| H | 1.560871000  | 0.186355000  | 2.704012000  |
| H | 2.701483000  | 1.154604000  | 3.712276000  |
| H | 1.574949000  | -1.940843000 | 0.935761000  |
| H | 1.693365000  | -2.079909000 | -0.720255000 |
| O | -3.056024000 | 4.019643000  | 0.027463000  |
| C | -4.472891000 | 3.873483000  | 0.007897000  |
| H | -4.818931000 | 3.338008000  | -0.903259000 |
| H | -4.843920000 | 3.329083000  | 0.903854000  |
| H | -4.889126000 | 4.898190000  | 0.007526000  |

77

(p-MeO-POCOP)IrH<sub>2</sub>---CH<sub>2</sub>Cl<sub>2</sub> dihydrogen bonded, E = -2873.262972

|    |              |              |              |
|----|--------------|--------------|--------------|
| C  | -0.110430000 | 1.180941000  | -3.604086000 |
| C  | -0.142476000 | 1.172196000  | -2.200565000 |
| C  | -0.154266000 | -0.038050000 | -1.452388000 |
| C  | -0.124250000 | -1.255864000 | -2.177891000 |
| C  | -0.091335000 | -1.297208000 | -3.587942000 |
| C  | -0.086570000 | -0.064548000 | -4.288268000 |
| H  | -0.100588000 | 2.116912000  | -4.178264000 |
| H  | -0.067732000 | -2.263125000 | -4.104846000 |
| O  | -0.117780000 | -2.447157000 | -1.487114000 |
| O  | -0.153080000 | 2.372406000  | -1.524098000 |
| P  | -0.183927000 | -2.277913000 | 0.252881000  |
| P  | -0.170205000 | 2.225364000  | 0.217459000  |
| Ir | -0.227246000 | -0.023004000 | 0.614539000  |
| H  | 0.810690000  | -0.029472000 | 1.802343000  |
| H  | -0.893933000 | -0.029564000 | 2.101410000  |
| C  | 1.395469000  | -3.212759000 | 0.710484000  |
| C  | -1.787727000 | -3.241581000 | 0.558459000  |

|   |              |              |              |
|---|--------------|--------------|--------------|
| C | 1.433148000  | 3.151010000  | 0.611834000  |
| C | -1.754282000 | 3.208564000  | 0.559318000  |
| C | 1.577599000  | -3.147154000 | 2.241845000  |
| H | 2.565899000  | -3.581673000 | 2.500914000  |
| H | 1.551258000  | -2.105757000 | 2.611004000  |
| H | 0.804835000  | -3.722080000 | 2.783702000  |
| C | -1.897889000 | -3.542159000 | 2.066844000  |
| H | -1.699672000 | -2.640751000 | 2.679258000  |
| H | -2.926230000 | -3.894656000 | 2.291834000  |
| H | -1.195527000 | -4.339011000 | 2.377831000  |
| C | 2.533282000  | -2.415391000 | 0.027008000  |
| H | 2.450607000  | -2.455879000 | -1.075856000 |
| H | 2.515261000  | -1.352257000 | 0.337480000  |
| H | 3.507580000  | -2.857847000 | 0.321388000  |
| C | 1.409806000  | -4.670546000 | 0.216140000  |
| H | 2.426578000  | -5.090351000 | 0.367100000  |
| H | 0.702501000  | -5.304373000 | 0.782861000  |
| H | 1.167736000  | -4.738949000 | -0.861653000 |
| C | -1.916638000 | -4.529609000 | -0.277353000 |
| H | -1.206133000 | -5.312168000 | 0.040875000  |
| H | -2.942130000 | -4.934913000 | -0.146218000 |
| H | -1.760756000 | -4.327041000 | -1.353403000 |
| C | -2.903493000 | -2.252228000 | 0.138824000  |
| H | -2.853283000 | -1.318474000 | 0.733324000  |
| H | -2.821517000 | -1.980828000 | -0.931951000 |
| H | -3.892316000 | -2.729867000 | 0.301691000  |
| C | 1.679148000  | 3.079654000  | 2.133735000  |
| H | 1.709488000  | 2.032567000  | 2.487121000  |
| H | 2.661215000  | 3.545456000  | 2.359403000  |
| H | 0.909781000  | 3.623625000  | 2.712446000  |
| C | -1.826426000 | 3.505546000  | 2.070950000  |
| H | -2.841312000 | 3.879344000  | 2.320459000  |
| H | -1.641068000 | 2.592608000  | 2.671979000  |
| H | -1.099437000 | 4.283454000  | 2.373240000  |
| C | 2.538439000  | 2.350038000  | -0.118944000 |
| H | 2.515045000  | 1.282057000  | 0.174860000  |
| H | 2.422427000  | 2.410180000  | -1.217735000 |
| H | 3.527364000  | 2.774343000  | 0.152282000  |
| C | 1.435702000  | 4.610424000  | 0.122542000  |
| H | 0.760365000  | 5.247766000  | 0.723336000  |
| H | 2.461660000  | 5.021834000  | 0.227357000  |
| H | 1.144809000  | 4.684125000  | -0.942659000 |
| C | -1.889458000 | 4.500178000  | -0.269850000 |
| H | -2.912330000 | 4.907753000  | -0.126243000 |
| H | -1.173454000 | 5.279863000  | 0.042706000  |
| H | -1.746691000 | 4.300142000  | -1.348237000 |
| C | -2.890117000 | 2.231972000  | 0.164016000  |
| H | -2.838829000 | 1.968013000  | -0.910457000 |
| H | -2.831747000 | 1.293614000  | 0.750760000  |
| H | -3.869923000 | 2.716937000  | 0.356734000  |
| H | -0.056549000 | 0.616541000  | 3.839401000  |
| C | 0.367393000  | 0.230366000  | 4.783945000  |

|    |              |              |              |
|----|--------------|--------------|--------------|
| H  | 0.217842000  | 0.908245000  | 5.641062000  |
| Cl | -0.453924000 | -1.323113000 | 5.145000000  |
| Cl | 2.137305000  | 0.035754000  | 4.533373000  |
| O  | -0.058193000 | 0.025296000  | -5.651289000 |
| C  | -0.031168000 | -1.181326000 | -6.416839000 |
| H  | 0.874877000  | -1.785323000 | -6.194646000 |
| H  | -0.933801000 | -1.802486000 | -6.231164000 |
| H  | -0.012599000 | -0.871354000 | -7.477888000 |

74

(m-bis-CF<sub>3</sub>-POCOP)IrH<sub>2</sub> S CH<sub>2</sub>Cl<sub>2</sub>, E = -2473.012401

|    |              |              |              |
|----|--------------|--------------|--------------|
| C  | -0.335500000 | 1.216599000  | -3.593898000 |
| C  | -0.206143000 | 1.205024000  | -2.178087000 |
| C  | -0.160238000 | -0.010762000 | -1.457264000 |
| C  | -0.231319000 | -1.229607000 | -2.170875000 |
| C  | -0.334261000 | -1.246977000 | -3.588841000 |
| C  | -0.390857000 | -0.016610000 | -4.272725000 |
| H  | -0.480452000 | -0.018847000 | -5.365911000 |
| O  | -0.197848000 | -2.408020000 | -1.494812000 |
| O  | -0.127678000 | 2.386336000  | -1.510735000 |
| P  | -0.031675000 | -2.264293000 | 0.247798000  |
| P  | -0.011205000 | 2.250162000  | 0.236315000  |
| Ir | 0.008147000  | -0.006272000 | 0.619326000  |
| H  | 0.923488000  | 0.009767000  | 1.934647000  |
| H  | -0.654773000 | -0.014151000 | 2.081383000  |
| C  | 1.598925000  | -3.204137000 | 0.433868000  |
| C  | -1.586141000 | -3.229778000 | 0.728561000  |
| C  | 1.599069000  | 3.218083000  | 0.457662000  |
| C  | -1.592194000 | 3.189920000  | 0.677371000  |
| C  | 2.011527000  | -3.162844000 | 1.920933000  |
| H  | 3.021726000  | -3.610727000 | 2.023287000  |
| H  | 2.053804000  | -2.121855000 | 2.295900000  |
| H  | 1.321105000  | -3.739841000 | 2.564056000  |
| C  | -1.513129000 | -3.541032000 | 2.237380000  |
| H  | -1.274061000 | -2.635610000 | 2.830671000  |
| H  | -2.499536000 | -3.920497000 | 2.575738000  |
| H  | -0.759791000 | -4.320615000 | 2.460425000  |
| C  | 2.613683000  | -2.389760000 | -0.406975000 |
| H  | 2.374557000  | -2.438883000 | -1.486343000 |
| H  | 2.628122000  | -1.325292000 | -0.097666000 |
| H  | 3.626240000  | -2.817104000 | -0.254894000 |
| C  | 1.538603000  | -4.651199000 | -0.087134000 |
| H  | 2.567958000  | -5.066730000 | -0.102662000 |
| H  | 0.928566000  | -5.301113000 | 0.567213000  |
| H  | 1.136375000  | -4.694668000 | -1.117142000 |
| C  | -1.804253000 | -4.512380000 | -0.098832000 |
| H  | -1.066410000 | -5.298278000 | 0.137647000  |
| H  | -2.810658000 | -4.915156000 | 0.140529000  |
| H  | -1.765240000 | -4.302750000 | -1.183838000 |
| C  | -2.747521000 | -2.244313000 | 0.445828000  |
| H  | -2.632863000 | -1.306925000 | 1.024406000  |
| H  | -2.799121000 | -1.981017000 | -0.628791000 |
| H  | -3.705348000 | -2.727886000 | 0.729569000  |

|   |              |              |              |
|---|--------------|--------------|--------------|
| C | 1.769094000  | 3.534150000  | 1.957650000  |
| H | 1.628425000  | 2.630881000  | 2.584732000  |
| H | 2.796769000  | 3.914747000  | 2.132228000  |
| H | 1.060765000  | 4.314501000  | 2.295596000  |
| C | -1.757671000 | 3.161752000  | 2.211999000  |
| H | -2.741587000 | 3.603743000  | 2.472992000  |
| H | -1.729521000 | 2.124434000  | 2.598423000  |
| H | -0.976999000 | 3.750149000  | 2.729217000  |
| C | 2.701283000  | 2.232811000  | -0.005194000 |
| H | 2.682583000  | 1.297367000  | 0.587217000  |
| H | 2.579593000  | 1.965808000  | -1.073241000 |
| H | 3.691457000  | 2.718528000  | 0.118950000  |
| C | 1.679064000  | 4.498188000  | -0.397801000 |
| H | 0.987634000  | 5.283870000  | -0.047670000 |
| H | 2.710166000  | 4.902946000  | -0.324684000 |
| H | 1.466313000  | 4.285164000  | -1.461783000 |
| C | -1.623069000 | 4.631677000  | 0.139312000  |
| H | -2.642696000 | 5.044774000  | 0.288301000  |
| H | -0.916694000 | 5.289991000  | 0.678041000  |
| H | -1.394928000 | 4.664724000  | -0.943026000 |
| C | -2.727449000 | 2.365538000  | 0.020193000  |
| H | -2.666157000 | 2.403144000  | -1.084095000 |
| H | -2.688974000 | 1.304373000  | 0.338671000  |
| H | -3.703313000 | 2.793446000  | 0.329350000  |
| C | -0.374924000 | -2.559469000 | -4.327555000 |
| F | -0.448699000 | -2.391793000 | -5.677471000 |
| F | 0.736812000  | -3.321418000 | -4.085323000 |
| F | -1.450232000 | -3.326747000 | -3.968176000 |
| C | -0.416010000 | 2.526152000  | -4.334570000 |
| F | 0.703408000  | 3.294376000  | -4.158159000 |
| F | -0.563034000 | 2.353182000  | -5.677776000 |
| F | -1.473529000 | 3.289500000  | -3.917353000 |

74

(m-bis-CF<sub>3</sub>-POCOP)IrH<sub>2</sub> NS CH<sub>2</sub>Cl<sub>2</sub>, E = -2473.014608

|    |              |              |              |
|----|--------------|--------------|--------------|
| C  | -0.123989000 | 1.229857000  | -3.615423000 |
| C  | -0.054676000 | 1.211666000  | -2.196787000 |
| C  | -0.024548000 | 0.000108000  | -1.470961000 |
| C  | -0.052948000 | -1.211224000 | -2.197267000 |
| C  | -0.122083000 | -1.228837000 | -3.615955000 |
| C  | -0.156343000 | 0.000644000  | -4.304631000 |
| H  | -0.214049000 | 0.000841000  | -5.399473000 |
| O  | -0.026603000 | -2.395827000 | -1.515175000 |
| O  | -0.029840000 | 2.396068000  | -1.514242000 |
| P  | -0.003891000 | -2.258062000 | 0.224137000  |
| P  | -0.008165000 | 2.257742000  | 0.224903000  |
| Ir | 0.027193000  | -0.000235000 | 0.611192000  |
| H  | 0.109973000  | 0.001126000  | 2.279346000  |
| H  | -1.481134000 | -0.001557000 | 0.912407000  |
| C  | 1.636416000  | -3.139718000 | 0.551321000  |
| C  | -1.553873000 | -3.264189000 | 0.602408000  |
| C  | 1.629631000  | 3.143329000  | 0.553498000  |
| C  | -1.560861000 | 3.259958000  | 0.602450000  |

|   |              |              |              |
|---|--------------|--------------|--------------|
| C | 1.692696000  | -3.544479000 | 2.037995000  |
| H | 2.722476000  | -3.878222000 | 2.282328000  |
| H | 1.442727000  | -2.692801000 | 2.701982000  |
| H | 1.006111000  | -4.382788000 | 2.262520000  |
| C | -1.846719000 | -3.142254000 | 2.113229000  |
| H | -1.942949000 | -2.082058000 | 2.417507000  |
| H | -2.803523000 | -3.658747000 | 2.334880000  |
| H | -1.058667000 | -3.610815000 | 2.731774000  |
| C | 2.688869000  | -2.038464000 | 0.266978000  |
| H | 2.642606000  | -1.686662000 | -0.782183000 |
| H | 2.548702000  | -1.167878000 | 0.943242000  |
| H | 3.705977000  | -2.442358000 | 0.450004000  |
| C | 1.897848000  | -4.344157000 | -0.373236000 |
| H | 2.938726000  | -4.693412000 | -0.208529000 |
| H | 1.223157000  | -5.191542000 | -0.160068000 |
| H | 1.788384000  | -4.065635000 | -1.437511000 |
| C | -1.419852000 | -4.737771000 | 0.174514000  |
| H | -0.683522000 | -5.283918000 | 0.793190000  |
| H | -2.402219000 | -5.237634000 | 0.305175000  |
| H | -1.131470000 | -4.823788000 | -0.890588000 |
| C | -2.691089000 | -2.595137000 | -0.207493000 |
| H | -2.786683000 | -1.517855000 | 0.030571000  |
| H | -2.527051000 | -2.700434000 | -1.296144000 |
| H | -3.648462000 | -3.091428000 | 0.052734000  |
| C | 1.684129000  | 3.546187000  | 2.040739000  |
| H | 1.436037000  | 2.692814000  | 2.703235000  |
| H | 2.712841000  | 3.882430000  | 2.286125000  |
| H | 0.994977000  | 4.382181000  | 2.266036000  |
| C | -1.853933000 | 3.137850000  | 2.113205000  |
| H | -2.811976000 | 3.652254000  | 2.334367000  |
| H | -1.947886000 | 2.077551000  | 2.417818000  |
| H | -1.067109000 | 3.608512000  | 2.731746000  |
| C | 2.684956000  | 2.045059000  | 0.268154000  |
| H | 2.546627000  | 1.173226000  | 0.943145000  |
| H | 2.640008000  | 1.694574000  | -0.781513000 |
| H | 3.700959000  | 2.451262000  | 0.452151000  |
| C | 1.888483000  | 4.349580000  | -0.369454000 |
| H | 1.212845000  | 5.195815000  | -0.154530000 |
| H | 2.929003000  | 4.700045000  | -0.205049000 |
| H | 1.778716000  | 4.072364000  | -1.434054000 |
| C | -1.430003000 | 4.733693000  | 0.174211000  |
| H | -2.413461000 | 5.231496000  | 0.304522000  |
| H | -0.694980000 | 5.281368000  | 0.793030000  |
| H | -1.141508000 | 4.820082000  | -0.890834000 |
| C | -2.696153000 | 2.588089000  | -0.207773000 |
| H | -2.531516000 | 2.693032000  | -1.296375000 |
| H | -2.789727000 | 1.510753000  | 0.030802000  |
| H | -3.654713000 | 3.082603000  | 0.051450000  |
| C | -0.174588000 | -2.540336000 | -4.354356000 |
| F | -0.263790000 | -2.373449000 | -5.703841000 |
| F | 0.935067000  | -3.311467000 | -4.129069000 |
| F | -1.250202000 | -3.302913000 | -3.981931000 |

|   |              |             |              |
|---|--------------|-------------|--------------|
| C | -0.178561000 | 2.541726000 | -4.353061000 |
| F | 0.929972000  | 3.314318000 | -4.127352000 |
| F | -0.267509000 | 2.375429000 | -5.702667000 |
| F | -1.255287000 | 3.302409000 | -3.980178000 |

79

(m-bis-CF3-POCOP)IrH2-CH2Cl2 dihydrogen bonded, E = -3432.241343

|    |              |              |              |
|----|--------------|--------------|--------------|
| C  | 0.073036000  | 1.166330000  | -3.568862000 |
| C  | -0.061833000 | 1.164045000  | -2.154674000 |
| C  | -0.124386000 | -0.040275000 | -1.418323000 |
| C  | -0.079618000 | -1.260080000 | -2.129976000 |
| C  | 0.055106000  | -1.292822000 | -3.543869000 |
| C  | 0.130284000  | -0.070747000 | -4.242277000 |
| O  | -0.154383000 | -2.436029000 | -1.439725000 |
| O  | -0.119969000 | 2.354477000  | -1.487840000 |
| P  | -0.240954000 | -2.281880000 | 0.298777000  |
| P  | -0.225933000 | 2.232969000  | 0.252362000  |
| Ir | -0.301861000 | -0.018981000 | 0.657864000  |
| H  | 1.134011000  | -0.021284000 | 1.218973000  |
| H  | -0.587792000 | -0.022449000 | 2.292239000  |
| C  | 1.300748000  | -3.280283000 | 0.728487000  |
| C  | -1.886591000 | -3.169574000 | 0.575653000  |
| C  | 1.317689000  | 3.229967000  | 0.680314000  |
| C  | -1.869414000 | 3.138444000  | 0.488249000  |
| C  | 1.511776000  | -3.223308000 | 2.254435000  |
| H  | 2.473126000  | -3.720574000 | 2.500164000  |
| H  | 1.562584000  | -2.181855000 | 2.618571000  |
| H  | 0.710897000  | -3.743097000 | 2.810739000  |
| C  | -1.990846000 | -3.549175000 | 2.066979000  |
| H  | -1.730349000 | -2.697144000 | 2.726589000  |
| H  | -3.034707000 | -3.852197000 | 2.290811000  |
| H  | -1.332149000 | -4.402331000 | 2.317681000  |
| C  | 2.468008000  | -2.557083000 | 0.012907000  |
| H  | 2.361166000  | -2.605437000 | -1.087088000 |
| H  | 2.536658000  | -1.493825000 | 0.313932000  |
| H  | 3.417149000  | -3.057994000 | 0.293793000  |
| C  | 1.212774000  | -4.734279000 | 0.227889000  |
| H  | 2.197837000  | -5.222515000 | 0.380734000  |
| H  | 0.461283000  | -5.318879000 | 0.790501000  |
| H  | 0.971980000  | -4.777667000 | -0.851428000 |
| C  | -2.107401000 | -4.390445000 | -0.337717000 |
| H  | -1.435159000 | -5.229690000 | -0.087589000 |
| H  | -3.151190000 | -4.744631000 | -0.204893000 |
| H  | -1.961738000 | -4.127844000 | -1.401880000 |
| C  | -2.935420000 | -2.080881000 | 0.234197000  |
| H  | -2.828901000 | -1.200248000 | 0.902953000  |
| H  | -2.847365000 | -1.742598000 | -0.816993000 |
| H  | -3.955699000 | -2.492545000 | 0.378282000  |
| C  | 1.542542000  | 3.150086000  | 2.204351000  |
| H  | 1.688148000  | 2.104443000  | 2.530625000  |
| H  | 2.462498000  | 3.715801000  | 2.459596000  |
| H  | 0.706311000  | 3.587663000  | 2.780655000  |
| C  | -1.999354000 | 3.537061000  | 1.972026000  |



|    |              |              |              |
|----|--------------|--------------|--------------|
| H  | -3.037389000 | 3.878524000  | 2.165375000  |
| H  | -1.791050000 | 2.679093000  | 2.642617000  |
| H  | -1.317331000 | 4.367799000  | 2.235716000  |
| C  | 2.482244000  | 2.521391000  | -0.053740000 |
| H  | 2.538083000  | 1.447217000  | 0.209947000  |
| H  | 2.379902000  | 2.608541000  | -1.151515000 |
| H  | 3.435005000  | 3.002191000  | 0.249080000  |
| C  | 1.222633000  | 4.691636000  | 0.204672000  |
| H  | 0.474871000  | 5.266565000  | 0.782114000  |
| H  | 2.208176000  | 5.179392000  | 0.355779000  |
| H  | 0.972671000  | 4.751065000  | -0.871745000 |
| C  | -2.065784000 | 4.349725000  | -0.443400000 |
| H  | -3.112653000 | 4.704908000  | -0.341133000 |
| H  | -1.400602000 | 5.191886000  | -0.184828000 |
| H  | -1.893429000 | 4.075575000  | -1.500561000 |
| C  | -2.920378000 | 2.053364000  | 0.141859000  |
| H  | -2.820777000 | 1.706112000  | -0.905219000 |
| H  | -2.828122000 | 1.177242000  | 0.818659000  |
| H  | -3.939668000 | 2.472553000  | 0.270242000  |
| H  | 0.352694000  | 0.507572000  | 3.816755000  |
| C  | 0.943923000  | 0.173582000  | 4.690453000  |
| H  | 0.955967000  | 0.899575000  | 5.520773000  |
| Cl | 0.200832000  | -1.348171000 | 5.283328000  |
| Cl | 2.638221000  | -0.048933000 | 4.125087000  |
| H  | 0.238654000  | -0.082640000 | -5.333280000 |
| C  | 0.130957000  | -2.612836000 | -4.264897000 |
| F  | 0.287564000  | -2.461688000 | -5.610109000 |
| F  | 1.180265000  | -3.380293000 | -3.831829000 |
| F  | -0.995225000 | -3.371574000 | -4.085572000 |
| C  | 0.166821000  | 2.470011000  | -4.316916000 |
| F  | 1.226608000  | 3.231919000  | -3.900249000 |
| F  | 0.320333000  | 2.289130000  | -5.658808000 |
| F  | -0.948911000 | 3.247740000  | -4.152932000 |

72

(PCP)IrH<sub>2</sub> tilted S CH<sub>2</sub>Cl<sub>2</sub>, E = -1727.852204

|    |              |              |              |
|----|--------------|--------------|--------------|
| Ir | -0.000856000 | -0.488720000 | 0.003541000  |
| H  | 0.013170000  | -1.907811000 | 0.757666000  |
| H  | -0.016029000 | -1.917641000 | -0.731555000 |
| C  | -0.000216000 | 1.625815000  | -0.011120000 |
| P  | -2.283410000 | -0.187224000 | -0.101121000 |
| P  | 2.282022000  | -0.187148000 | 0.104157000  |
| C  | -2.462265000 | 1.600202000  | -0.641713000 |
| C  | -3.268389000 | -1.146463000 | -1.427165000 |
| C  | -3.128559000 | -0.236394000 | 1.615194000  |
| C  | 2.461755000  | 1.607492000  | 0.619989000  |
| C  | 3.266703000  | -1.128670000 | 1.443026000  |
| C  | 3.127216000  | -0.260314000 | -1.611311000 |
| C  | -1.193893000 | 2.360585000  | -0.298505000 |
| C  | -1.188879000 | 3.773271000  | -0.301086000 |
| C  | 0.000612000  | 4.476810000  | -0.030794000 |
| C  | 1.193874000  | 2.363785000  | 0.266099000  |
| C  | 1.189683000  | 3.776372000  | 0.249184000  |

|   |              |              |              |
|---|--------------|--------------|--------------|
| H | -2.114475000 | 4.328683000  | -0.523295000 |
| H | 0.000927000  | 5.578391000  | -0.038375000 |
| H | 2.115591000  | 4.334254000  | 0.463778000  |
| H | -2.593155000 | 1.578446000  | -1.743473000 |
| H | -3.374062000 | 2.079538000  | -0.231680000 |
| H | 2.592357000  | 1.601000000  | 1.721987000  |
| H | 3.373870000  | 2.080552000  | 0.203444000  |
| C | -3.445324000 | -2.608161000 | -0.970203000 |
| C | -2.372543000 | -1.118912000 | -2.689418000 |
| C | -4.635838000 | -0.520310000 | -1.771488000 |
| C | -2.791999000 | -1.581216000 | 2.295844000  |
| C | -4.652179000 | -0.024124000 | 1.571563000  |
| C | -2.469317000 | 0.897240000  | 2.436825000  |
| C | 2.791337000  | -1.614794000 | -2.272806000 |
| C | 2.467384000  | 0.861195000  | -2.448952000 |
| C | 4.650742000  | -0.046610000 | -1.570654000 |
| C | 3.444282000  | -2.596224000 | 1.005437000  |
| C | 4.633928000  | -0.497744000 | 1.779452000  |
| C | 2.370424000  | -1.084649000 | 2.704467000  |
| H | -2.837934000 | 0.842362000  | 3.482891000  |
| H | -1.366526000 | 0.790448000  | 2.440137000  |
| H | -2.715040000 | 1.901653000  | 2.042257000  |
| H | -4.931301000 | 0.896588000  | 1.022380000  |
| H | -5.034911000 | 0.077393000  | 2.609594000  |
| H | -5.175634000 | -0.882211000 | 1.109730000  |
| H | -3.238035000 | -2.444609000 | 1.769327000  |
| H | -3.189299000 | -1.574160000 | 3.333043000  |
| H | -1.695302000 | -1.728287000 | 2.335922000  |
| H | -5.346276000 | -0.561464000 | -0.928029000 |
| H | -5.086527000 | -1.085046000 | -2.615427000 |
| H | -4.540962000 | 0.534151000  | -2.095213000 |
| H | -2.211452000 | -0.087089000 | -3.060369000 |
| H | -1.379699000 | -1.562519000 | -2.482786000 |
| H | -2.867092000 | -1.695336000 | -3.499811000 |
| H | -3.830438000 | -3.215228000 | -1.816553000 |
| H | -4.172115000 | -2.695356000 | -0.140264000 |
| H | -2.481182000 | -3.045823000 | -0.643524000 |
| H | 2.836575000  | 0.792088000  | -3.493972000 |
| H | 1.364695000  | 0.753344000  | -2.451268000 |
| H | 2.711968000  | 1.871217000  | -2.068262000 |
| H | 3.238521000  | -2.470363000 | -1.734619000 |
| H | 3.187863000  | -1.621876000 | -3.310299000 |
| H | 1.694740000  | -1.763365000 | -2.310014000 |
| H | 4.929310000  | 0.881854000  | -1.034395000 |
| H | 5.033415000  | 0.040621000  | -2.610003000 |
| H | 5.174729000  | -0.897837000 | -1.096860000 |
| H | 3.829171000  | -3.191913000 | 1.859935000  |
| H | 4.171583000  | -2.694043000 | 0.177134000  |
| H | 2.480539000  | -3.038652000 | 0.684017000  |
| H | 2.209214000  | -0.048047000 | 3.061806000  |
| H | 1.377640000  | -1.530850000 | 2.503174000  |
| H | 2.864626000  | -1.650462000 | 3.522516000  |

|   |             |              |             |
|---|-------------|--------------|-------------|
| H | 5.344479000 | -0.549532000 | 0.936681000 |
| H | 5.084657000 | -1.051459000 | 2.630643000 |
| H | 4.538742000 | 0.560755000  | 2.089606000 |

72

(PCP)IrH<sub>2</sub> tilted NS CH<sub>2</sub>Cl<sub>2</sub>, E = -1727.85312

|    |              |              |              |
|----|--------------|--------------|--------------|
| Ir | -0.163538000 | -0.581425000 | -0.222742000 |
| H  | -0.191058000 | -0.454394000 | -1.753654000 |
| H  | -0.173715000 | -2.264434000 | -0.400192000 |
| C  | -0.147483000 | 1.507964000  | -0.025839000 |
| P  | -2.446707000 | -0.270461000 | -0.139299000 |
| P  | 2.128061000  | -0.307670000 | -0.171793000 |
| C  | -2.636201000 | 1.551182000  | -0.527168000 |
| C  | -3.592804000 | -1.127088000 | -1.400863000 |
| C  | -3.080973000 | -0.455095000 | 1.657102000  |
| C  | 2.336966000  | 1.433422000  | 0.493815000  |
| C  | 2.984700000  | -1.391275000 | 1.142426000  |
| C  | 3.028250000  | -0.291838000 | -1.848216000 |
| C  | -1.347181000 | 2.277260000  | -0.179677000 |
| C  | -1.335557000 | 3.682214000  | -0.043632000 |
| C  | -0.131036000 | 4.361559000  | 0.227481000  |
| C  | 1.060499000  | 2.223482000  | 0.258949000  |
| C  | 1.064307000  | 3.631225000  | 0.375072000  |
| H  | -2.271201000 | 4.253739000  | -0.160276000 |
| H  | -0.124626000 | 5.458715000  | 0.324406000  |
| H  | 2.005871000  | 4.161820000  | 0.593461000  |
| H  | -2.813172000 | 1.607065000  | -1.622266000 |
| H  | -3.529533000 | 1.996693000  | -0.044579000 |
| H  | 2.513036000  | 1.331345000  | 1.584849000  |
| H  | 3.239047000  | 1.932032000  | 0.085906000  |
| C  | -3.815377000 | -2.594969000 | -0.986665000 |
| C  | -2.820241000 | -1.101936000 | -2.741114000 |
| C  | -4.943884000 | -0.403983000 | -1.585785000 |
| C  | -2.685955000 | -1.854462000 | 2.180438000  |
| C  | -4.596451000 | -0.232810000 | 1.807325000  |
| C  | -2.325111000 | 0.604955000  | 2.494059000  |
| C  | 2.671291000  | -1.579232000 | -2.622025000 |
| C  | 2.464359000  | 0.925424000  | -2.619457000 |
| C  | 4.555462000  | -0.153352000 | -1.707756000 |
| C  | 3.153615000  | -2.823616000 | 0.599485000  |
| C  | 4.333516000  | -0.844288000 | 1.649315000  |
| C  | 1.960728000  | -1.410687000 | 2.305337000  |
| H  | -2.602117000 | 0.479365000  | 3.561728000  |
| H  | -1.226478000 | 0.491657000  | 2.405445000  |
| H  | -2.578240000 | 1.638886000  | 2.193279000  |
| H  | -4.916176000 | 0.743032000  | 1.391887000  |
| H  | -4.859126000 | -0.238090000 | 2.886713000  |
| H  | -5.183752000 | -1.033506000 | 1.320615000  |
| H  | -3.215362000 | -2.668076000 | 1.653583000  |
| H  | -2.938124000 | -1.925628000 | 3.259537000  |
| H  | -1.597478000 | -2.029936000 | 2.065342000  |
| H  | -5.547872000 | -0.386534000 | -0.661987000 |
| H  | -5.532669000 | -0.938931000 | -2.361001000 |

|   |              |              |              |
|---|--------------|--------------|--------------|
| H | -4.811414000 | 0.638182000  | -1.934370000 |
| H | -2.568489000 | -0.070177000 | -3.058653000 |
| H | -1.879362000 | -1.679001000 | -2.665721000 |
| H | -3.453158000 | -1.554167000 | -3.533368000 |
| H | -4.306205000 | -3.139766000 | -1.820453000 |
| H | -4.472365000 | -2.681123000 | -0.100625000 |
| H | -2.852316000 | -3.096843000 | -0.766784000 |
| H | 2.875424000  | 0.917085000  | -3.650589000 |
| H | 1.359850000  | 0.887792000  | -2.683171000 |
| H | 2.746733000  | 1.886780000  | -2.149882000 |
| H | 3.070788000  | -2.485857000 | -2.132248000 |
| H | 3.106296000  | -1.523701000 | -3.642163000 |
| H | 1.573965000  | -1.693873000 | -2.711229000 |
| H | 4.839357000  | 0.725324000  | -1.095774000 |
| H | 5.003451000  | -0.018607000 | -2.715126000 |
| H | 5.010990000  | -1.056580000 | -1.260227000 |
| H | 3.446198000  | -3.499616000 | 1.430442000  |
| H | 3.946077000  | -2.879748000 | -0.171013000 |
| H | 2.205789000  | -3.196967000 | 0.164301000  |
| H | 1.783806000  | -0.400842000 | 2.725962000  |
| H | 0.988181000  | -1.827414000 | 1.962598000  |
| H | 2.336160000  | -2.056892000 | 3.126323000  |
| H | 5.106818000  | -0.839140000 | 0.860906000  |
| H | 4.699292000  | -1.494315000 | 2.472639000  |
| H | 4.243498000  | 0.181747000  | 2.054882000  |

77

(PCP)IrH<sub>2</sub>-tilted-CH<sub>2</sub>Cl<sub>2</sub>, E = -2687.081246

|    |              |              |              |
|----|--------------|--------------|--------------|
| Ir | -0.152798000 | -0.556333000 | -0.277066000 |
| H  | -0.204946000 | -0.394860000 | -1.805096000 |
| H  | -0.158631000 | -2.222212000 | -0.542151000 |
| C  | -0.145961000 | 1.526961000  | -0.026562000 |
| P  | -2.437246000 | -0.268477000 | -0.139277000 |
| P  | 2.136143000  | -0.281176000 | -0.223042000 |
| C  | -2.645914000 | 1.560696000  | -0.477245000 |
| C  | -3.599160000 | -1.103470000 | -1.400812000 |
| C  | -3.039796000 | -0.501631000 | 1.662196000  |
| C  | 2.360033000  | 1.472742000  | 0.404967000  |
| C  | 2.918103000  | -1.347447000 | 1.148971000  |
| C  | 3.076457000  | -0.331067000 | -1.873122000 |
| C  | -1.355995000 | 2.288696000  | -0.136189000 |
| C  | -1.353563000 | 3.690153000  | 0.030892000  |
| C  | -0.148638000 | 4.374890000  | 0.286197000  |
| C  | 1.064070000  | 2.248504000  | 0.233660000  |
| C  | 1.057225000  | 3.653650000  | 0.381447000  |
| H  | -2.296859000 | 4.255221000  | -0.049945000 |
| H  | -0.149748000 | 5.469533000  | 0.408367000  |
| H  | 1.999877000  | 4.189076000  | 0.582729000  |
| H  | -2.841640000 | 1.642133000  | -1.567611000 |
| H  | -3.534096000 | 1.987851000  | 0.030746000  |
| H  | 2.608884000  | 1.397970000  | 1.483525000  |
| H  | 3.227380000  | 1.973994000  | -0.069273000 |
| C  | -3.798551000 | -2.582792000 | -1.019491000 |

|    |              |              |              |
|----|--------------|--------------|--------------|
| C  | -2.852438000 | -1.038854000 | -2.754336000 |
| C  | -4.959828000 | -0.388748000 | -1.543349000 |
| C  | -2.587680000 | -1.893723000 | 2.153197000  |
| C  | -4.559925000 | -0.334677000 | 1.835156000  |
| C  | -2.312034000 | 0.569039000  | 2.510347000  |
| C  | 2.734980000  | -1.646602000 | -2.604955000 |
| C  | 2.529147000  | 0.856082000  | -2.701252000 |
| C  | 4.599717000  | -0.189235000 | -1.697335000 |
| C  | 3.026653000  | -2.806657000 | 0.664155000  |
| C  | 4.279299000  | -0.851356000 | 1.671412000  |
| C  | 1.861498000  | -1.260528000 | 2.278926000  |
| H  | -2.556020000 | 0.400957000  | 3.580241000  |
| H  | -1.212325000 | 0.509006000  | 2.391744000  |
| H  | -2.621037000 | 1.597945000  | 2.246650000  |
| H  | -4.918400000 | 0.636783000  | 1.441744000  |
| H  | -4.806649000 | -0.368000000 | 2.917771000  |
| H  | -5.126583000 | -1.146344000 | 1.342358000  |
| H  | -3.041880000 | -2.722495000 | 1.583577000  |
| H  | -2.867573000 | -2.017645000 | 3.220512000  |
| H  | -1.489203000 | -2.003617000 | 2.078624000  |
| H  | -5.550148000 | -0.406716000 | -0.610965000 |
| H  | -5.554631000 | -0.905934000 | -2.326015000 |
| H  | -4.843558000 | 0.665118000  | -1.861472000 |
| H  | -2.615394000 | 0.002255000  | -3.052054000 |
| H  | -1.905688000 | -1.609416000 | -2.710286000 |
| H  | -3.496536000 | -1.477929000 | -3.544970000 |
| H  | -4.312539000 | -3.108881000 | -1.851501000 |
| H  | -4.424707000 | -2.700388000 | -0.115150000 |
| H  | -2.829815000 | -3.087238000 | -0.841495000 |
| H  | 2.969187000  | 0.816646000  | -3.719583000 |
| H  | 1.427005000  | 0.807339000  | -2.796249000 |
| H  | 2.791715000  | 1.834912000  | -2.256745000 |
| H  | 3.132287000  | -2.532595000 | -2.077099000 |
| H  | 3.183531000  | -1.626105000 | -3.620468000 |
| H  | 1.639208000  | -1.768885000 | -2.702944000 |
| H  | 4.869972000  | 0.705861000  | -1.102956000 |
| H  | 5.075536000  | -0.085073000 | -2.695510000 |
| H  | 5.040375000  | -1.079701000 | -1.210796000 |
| H  | 3.221098000  | -3.472588000 | 1.530469000  |
| H  | 3.858074000  | -2.935405000 | -0.055005000 |
| H  | 2.086491000  | -3.132463000 | 0.179807000  |
| H  | 1.741762000  | -0.229039000 | 2.663862000  |
| H  | 0.872862000  | -1.624054000 | 1.919068000  |
| H  | 2.155730000  | -1.911982000 | 3.127039000  |
| H  | 5.073120000  | -0.927115000 | 0.906927000  |
| H  | 4.584496000  | -1.479780000 | 2.535194000  |
| H  | 4.236095000  | 0.196818000  | 2.025120000  |
| C  | -0.291399000 | -4.700729000 | 1.055154000  |
| H  | 0.482414000  | -5.356099000 | 0.621144000  |
| H  | -0.303458000 | -3.694738000 | 0.583473000  |
| Cl | -1.890740000 | -5.470728000 | 0.767486000  |
| Cl | 0.074995000  | -4.504239000 | 2.805048000  |

5

CH<sub>2</sub>Cl<sub>2</sub> in CH<sub>2</sub>Cl<sub>2</sub>, E = -959.2127688

|    |              |              |             |
|----|--------------|--------------|-------------|
| H  | -0.939617000 | -1.401214000 | 6.794319000 |
| C  | -0.052527000 | -1.672344000 | 6.196918000 |
| H  | 0.886753000  | -1.460342000 | 6.735537000 |
| Cl | -0.120108000 | -3.438307000 | 5.871015000 |
| Cl | -0.069060000 | -0.683175000 | 4.696676000 |

74

(p-MeOOC-POCOP)IrH<sub>2</sub> NS toluene DLPNO-SCS-MP2, E = -2021.994798

|    |              |             |             |
|----|--------------|-------------|-------------|
| Ir | 2.889272000  | 4.082108000 | 4.067828000 |
| P  | 0.916949000  | 3.180694000 | 3.410620000 |
| P  | 4.530129000  | 5.622240000 | 4.397209000 |
| O  | 0.041566000  | 4.464841000 | 2.708965000 |
| C  | -0.567476000 | 1.489148000 | 1.665059000 |
| O  | 3.958788000  | 7.047763000 | 3.653807000 |
| C  | -1.714593000 | 2.896748000 | 4.528433000 |
| C  | 6.877435000  | 6.853705000 | 3.340508000 |
| C  | 0.103596000  | 6.766823000 | 2.045015000 |
| C  | 5.056877000  | 5.039918000 | 7.090652000 |
| C  | 2.112132000  | 8.094509000 | 2.539095000 |
| C  | 7.105207000  | 4.526089000 | 4.299287000 |
| C  | 5.576597000  | 7.407936000 | 6.395581000 |
| C  | 2.684947000  | 6.964267000 | 3.131253000 |
| C  | 0.857432000  | 1.954678000 | 1.999120000 |
| C  | 0.817899000  | 7.981036000 | 1.991617000 |
| C  | 5.898624000  | 4.906091000 | 2.134275000 |
| C  | 2.009881000  | 5.730176000 | 3.213549000 |
| C  | 1.753344000  | 0.749022000 | 2.330428000 |
| C  | 0.148077000  | 3.839937000 | 5.907329000 |
| C  | 6.188665000  | 5.491288000 | 3.531257000 |
| C  | 0.110229000  | 1.384142000 | 5.407952000 |
| C  | 0.718979000  | 5.666339000 | 2.652853000 |
| C  | 4.643341000  | 6.209501000 | 6.179610000 |
| C  | 3.204448000  | 6.628659000 | 6.545121000 |
| C  | -0.217487000 | 2.777266000 | 4.849008000 |
| C  | 1.437635000  | 2.689597000 | 0.773997000 |
| H  | -0.985449000 | 0.845906000 | 2.452163000 |
| H  | -1.241850000 | 2.343580000 | 1.503273000 |
| H  | -0.535697000 | 0.896433000 | 0.735278000 |
| H  | -1.954174000 | 3.882009000 | 4.104368000 |
| H  | -2.056517000 | 2.122248000 | 3.829970000 |
| H  | -2.282263000 | 2.776789000 | 5.466712000 |
| H  | 6.234870000  | 7.549232000 | 2.783060000 |
| H  | 7.159706000  | 7.322240000 | 4.290691000 |
| H  | 7.801252000  | 6.692959000 | 2.759618000 |
| H  | -0.895919000 | 6.680523000 | 1.618293000 |
| H  | 4.385914000  | 4.176672000 | 6.966324000 |
| H  | 6.086525000  | 4.706036000 | 6.901262000 |
| H  | 5.002026000  | 5.375891000 | 8.139738000 |
| H  | 2.652415000  | 9.041594000 | 2.486312000 |
| H  | 6.591438000  | 3.581201000 | 4.537269000 |
| H  | 7.979013000  | 4.289864000 | 3.669552000 |

|   |              |              |              |
|---|--------------|--------------|--------------|
| H | 7.479327000  | 4.971317000  | 5.233176000  |
| H | 6.634538000  | 7.124936000  | 6.302242000  |
| H | 5.357959000  | 8.222849000  | 5.689653000  |
| H | 5.427505000  | 7.791945000  | 7.418996000  |
| H | 5.562878000  | 3.860835000  | 2.195826000  |
| H | 5.136608000  | 5.492641000  | 1.597094000  |
| H | 6.829833000  | 4.930732000  | 1.544402000  |
| H | 1.384320000  | 0.180439000  | 3.196244000  |
| H | 1.765099000  | 0.069940000  | 1.461617000  |
| H | 2.786159000  | 1.064086000  | 2.539923000  |
| H | -0.018427000 | 4.862503000  | 5.533228000  |
| H | -0.480497000 | 3.697395000  | 6.802355000  |
| H | 1.202967000  | 3.738267000  | 6.222200000  |
| H | 1.189983000  | 1.266251000  | 5.591591000  |
| H | -0.416748000 | 1.254638000  | 6.368020000  |
| H | -0.225878000 | 0.582274000  | 4.733757000  |
| H | 2.490807000  | 5.799318000  | 6.412073000  |
| H | 3.180399000  | 6.921070000  | 7.608460000  |
| H | 2.860993000  | 7.481871000  | 5.941434000  |
| H | 0.794085000  | 3.526457000  | 0.465793000  |
| H | 2.447669000  | 3.080287000  | 0.970440000  |
| H | 1.504837000  | 1.974343000  | -0.062671000 |
| H | 3.586862000  | 3.559689000  | 2.823287000  |
| H | 3.590578000  | 2.752182000  | 4.761362000  |
| C | 0.237252000  | 9.196440000  | 1.349381000  |
| O | 0.784227000  | 10.280203000 | 1.306717000  |
| O | -0.973987000 | 8.968220000  | 0.806711000  |
| C | -1.587089000 | 10.098485000 | 0.178597000  |
| H | -1.743931000 | 10.907804000 | 0.904650000  |
| H | -0.962006000 | 10.470917000 | -0.644443000 |
| H | -2.548800000 | 9.741385000  | -0.205154000 |

86

(p-MeOOC-POCOP)IrH<sub>2</sub>-IC<sub>6</sub>F<sub>5</sub> toluene DLPNO-SCS-MP2, E = -2021.994798

|    |              |             |             |
|----|--------------|-------------|-------------|
| Ir | 2.897691000  | 4.066189000 | 4.041720000 |
| P  | 0.915893000  | 3.167470000 | 3.388469000 |
| P  | 4.540735000  | 5.610335000 | 4.385588000 |
| O  | 0.038774000  | 4.461068000 | 2.712930000 |
| C  | -0.632912000 | 1.551010000 | 1.638144000 |
| O  | 3.975813000  | 7.024998000 | 3.620737000 |
| C  | -1.687793000 | 2.898007000 | 4.573383000 |
| C  | 6.841477000  | 6.873933000 | 3.280180000 |
| C  | 0.107229000  | 6.760602000 | 2.047279000 |
| C  | 5.017057000  | 5.045269000 | 7.090354000 |
| C  | 2.125724000  | 8.078023000 | 2.521214000 |
| C  | 7.176989000  | 4.642944000 | 4.411286000 |
| C  | 5.551487000  | 7.410109000 | 6.383775000 |
| C  | 2.700953000  | 6.944025000 | 3.103498000 |
| C  | 0.811373000  | 1.958452000 | 1.965676000 |
| C  | 0.823987000  | 7.972693000 | 1.991084000 |
| C  | 5.992822000  | 4.789567000 | 2.206498000 |
| C  | 2.028956000  | 5.707770000 | 3.175720000 |
| C  | 1.664583000  | 0.717472000 | 2.271137000 |

|   |              |              |              |
|---|--------------|--------------|--------------|
| C | 0.219993000  | 3.819074000  | 5.905587000  |
| C | 6.221836000  | 5.493027000  | 3.559154000  |
| C | 0.148900000  | 1.365355000  | 5.393069000  |
| C | 0.725270000  | 5.655950000  | 2.644158000  |
| C | 4.620872000  | 6.209873000  | 6.164919000  |
| C | 3.177429000  | 6.634790000  | 6.504526000  |
| C | -0.183807000 | 2.764628000  | 4.852710000  |
| C | 1.410938000  | 2.689332000  | 0.747426000  |
| H | -1.064671000 | 0.908089000  | 2.417996000  |
| H | -1.278339000 | 2.431179000  | 1.498961000  |
| H | -0.630415000 | 0.974449000  | 0.697756000  |
| H | -1.930966000 | 3.887819000  | 4.162076000  |
| H | -2.054414000 | 2.130447000  | 3.879865000  |
| H | -2.230680000 | 2.776455000  | 5.525929000  |
| H | 6.198191000  | 7.473500000  | 2.622282000  |
| H | 7.033317000  | 7.446033000  | 4.195935000  |
| H | 7.808391000  | 6.716707000  | 2.773096000  |
| H | -0.900360000 | 6.680271000  | 1.638869000  |
| H | 4.349688000  | 4.180519000  | 6.955111000  |
| H | 6.050774000  | 4.711268000  | 6.926039000  |
| H | 4.937841000  | 5.385427000  | 8.136514000  |
| H | 2.667190000  | 9.024627000  | 2.472094000  |
| H | 6.721084000  | 3.685418000  | 4.704344000  |
| H | 8.075986000  | 4.417543000  | 3.813833000  |
| H | 7.504279000  | 5.174417000  | 5.316868000  |
| H | 6.610601000  | 7.134621000  | 6.281938000  |
| H | 5.323472000  | 8.227845000  | 5.684051000  |
| H | 5.405957000  | 7.787400000  | 7.410141000  |
| H | 5.700973000  | 3.738250000  | 2.344119000  |
| H | 5.219147000  | 5.298063000  | 1.609459000  |
| H | 6.935865000  | 4.811409000  | 1.635466000  |
| H | 1.279944000  | 0.144344000  | 3.126960000  |
| H | 1.651646000  | 0.055127000  | 1.389574000  |
| H | 2.708507000  | 0.989980000  | 2.480255000  |
| H | 0.052335000  | 4.844981000  | 5.541035000  |
| H | -0.384655000 | 3.678995000  | 6.817346000  |
| H | 1.282005000  | 3.704793000  | 6.193088000  |
| H | 1.233656000  | 1.233967000  | 5.534989000  |
| H | -0.342989000 | 1.236802000  | 6.371725000  |
| H | -0.222090000 | 0.571471000  | 4.727872000  |
| H | 2.464061000  | 5.805949000  | 6.368983000  |
| H | 3.138171000  | 6.937640000  | 7.564433000  |
| H | 2.844391000  | 7.483022000  | 5.888197000  |
| H | 0.804043000  | 3.560606000  | 0.460640000  |
| H | 2.440727000  | 3.027219000  | 0.939292000  |
| H | 1.435776000  | 1.987054000  | -0.102230000 |
| I | 5.231529000  | 0.890132000  | 4.349206000  |
| F | 9.534557000  | -2.163290000 | 5.606551000  |
| F | 9.029633000  | -4.011677000 | 3.667697000  |
| F | 7.884680000  | -0.049808000 | 5.935456000  |
| F | 6.904255000  | -3.686514000 | 1.986886000  |
| F | 5.235615000  | -1.585430000 | 2.297345000  |



|   |              |              |              |
|---|--------------|--------------|--------------|
| C | 8.491558000  | -2.002551000 | 4.790900000  |
| C | 7.610726000  | -0.931497000 | 4.970099000  |
| C | 6.527187000  | -0.733249000 | 4.104723000  |
| C | 6.272209000  | -1.707779000 | 3.131106000  |
| C | 7.145183000  | -2.783212000 | 2.938434000  |
| C | 8.215024000  | -2.969281000 | 3.819066000  |
| H | 3.584038000  | 3.590685000  | 2.770680000  |
| H | 3.549443000  | 2.745804000  | 4.806467000  |
| C | 0.238806000  | 9.193109000  | 1.361801000  |
| O | 0.789217000  | 10.274896000 | 1.317341000  |
| O | -0.979901000 | 8.970580000  | 0.834669000  |
| C | -1.598430000 | 10.104908000 | 0.218760000  |
| H | -1.743382000 | 10.911743000 | 0.949964000  |
| H | -0.983191000 | 10.478483000 | -0.611122000 |
| H | -2.566003000 | 9.751535000  | -0.153413000 |

12

IC6F5 toluene DLPNO-SCS-MP2, E = -1022.436628

|   |             |              |             |
|---|-------------|--------------|-------------|
| I | 5.255220000 | 0.877801000  | 4.346944000 |
| F | 9.531948000 | -2.159738000 | 5.605907000 |
| F | 9.030501000 | -4.005914000 | 3.665635000 |
| F | 7.878184000 | -0.048020000 | 5.936956000 |
| F | 6.903453000 | -3.685179000 | 1.988172000 |
| F | 5.231959000 | -1.584875000 | 2.298005000 |
| C | 8.489231000 | -2.001291000 | 4.792343000 |
| C | 7.610394000 | -0.929402000 | 4.973334000 |
| C | 6.525845000 | -0.738851000 | 4.105541000 |
| C | 6.267963000 | -1.708659000 | 3.127393000 |
| C | 7.142580000 | -2.783810000 | 2.939501000 |
| C | 8.214879000 | -2.966218000 | 3.817738000 |

77

Cp\*Ru(dppm)H2+ short CH<sub>2</sub>Cl<sub>2</sub>, E = -2133.492610

|    |              |              |              |
|----|--------------|--------------|--------------|
| Ru | -1.514431000 | 0.183063000  | 1.064139000  |
| C  | -1.459561000 | -1.606958000 | -0.288874000 |
| C  | -2.745858000 | -0.934597000 | -0.422475000 |
| C  | -3.412983000 | -0.974126000 | 0.854688000  |
| C  | -2.540222000 | -1.674939000 | 1.794957000  |
| C  | -1.347689000 | -2.077213000 | 1.073572000  |
| C  | -0.509876000 | -1.916414000 | -1.410483000 |
| C  | -3.320598000 | -0.396344000 | -1.701155000 |
| C  | -4.829424000 | -0.555961000 | 1.123289000  |
| C  | -2.947560000 | -2.100746000 | 3.177441000  |
| C  | -0.228433000 | -2.924680000 | 1.602283000  |
| C  | -0.263850000 | 2.311873000  | 2.995849000  |
| P  | -2.026954000 | 1.831874000  | 2.600702000  |
| C  | -2.913821000 | 3.353572000  | 2.072944000  |
| C  | -2.931987000 | 4.483485000  | 2.923575000  |
| C  | -3.620538000 | 5.643387000  | 2.529876000  |
| C  | -4.306609000 | 5.675031000  | 1.297857000  |
| C  | -4.299602000 | 4.546872000  | 0.456538000  |
| C  | -3.599775000 | 3.387055000  | 0.841526000  |
| C  | -2.867116000 | 1.455322000  | 4.192648000  |
| C  | -4.280054000 | 1.362912000  | 4.179852000  |

|   |              |              |              |
|---|--------------|--------------|--------------|
| C | -4.977425000 | 0.994992000  | 5.342606000  |
| C | -4.273508000 | 0.723136000  | 6.532766000  |
| C | -2.871661000 | 0.841371000  | 6.557875000  |
| C | -2.168939000 | 1.209480000  | 5.394892000  |
| P | 0.423529000  | 0.778085000  | 2.162659000  |
| C | 1.905559000  | 1.302540000  | 1.222288000  |
| C | 2.774773000  | 2.295160000  | 1.729394000  |
| C | 3.921689000  | 2.658948000  | 1.000837000  |
| C | 4.208930000  | 2.029583000  | -0.226753000 |
| C | 3.345769000  | 1.037304000  | -0.730852000 |
| C | 2.192725000  | 0.676587000  | -0.010304000 |
| C | 1.095512000  | -0.294071000 | 3.496950000  |
| C | 0.177166000  | -0.895952000 | 4.385732000  |
| C | 0.629941000  | -1.722734000 | 5.426366000  |
| C | 2.008459000  | -1.976864000 | 5.572010000  |
| C | 2.925947000  | -1.398577000 | 4.674628000  |
| C | 2.475986000  | -0.556069000 | 3.639704000  |
| H | -2.410137000 | 4.455116000  | 3.892487000  |
| H | -3.626121000 | 6.525676000  | 3.187514000  |
| H | -4.849351000 | 6.583340000  | 0.995485000  |
| H | -4.838177000 | 4.567253000  | -0.502717000 |
| H | -3.582435000 | 2.501929000  | 0.187890000  |
| H | -4.837277000 | 1.594342000  | 3.261015000  |
| H | -6.075225000 | 0.924559000  | 5.319599000  |
| H | -4.819427000 | 0.432000000  | 7.442566000  |
| H | -2.315718000 | 0.651178000  | 7.488173000  |
| H | -1.076805000 | 1.305203000  | 5.441634000  |
| H | 2.561123000  | 2.782555000  | 2.692486000  |
| H | 4.594006000  | 3.436397000  | 1.393730000  |
| H | 5.107135000  | 2.316868000  | -0.793854000 |
| H | 3.566296000  | 0.546624000  | -1.690651000 |
| H | 1.505301000  | -0.085248000 | -0.405422000 |
| H | -0.897050000 | -0.728331000 | 4.245628000  |
| H | -0.096046000 | -2.179487000 | 6.115760000  |
| H | 2.366159000  | -2.632440000 | 6.380124000  |
| H | 4.002434000  | -1.602224000 | 4.777828000  |
| H | 3.201127000  | -0.109045000 | 2.945941000  |
| H | -1.648564000 | 1.506868000  | 0.099659000  |
| H | -0.712828000 | 1.051064000  | -0.075239000 |
| H | -0.837796000 | -2.834328000 | -1.944005000 |
| H | 0.514083000  | -2.101240000 | -1.036372000 |
| H | -0.466831000 | -1.096041000 | -2.150840000 |
| H | -3.845388000 | -1.208466000 | -2.248114000 |
| H | -4.055079000 | 0.408091000  | -1.510305000 |
| H | -2.532365000 | 0.001239000  | -2.367345000 |
| H | -5.527311000 | -1.347841000 | 0.776216000  |
| H | -5.007595000 | -0.407625000 | 2.202292000  |
| H | -5.094845000 | 0.377813000  | 0.593506000  |
| H | -3.749893000 | -2.865817000 | 3.111756000  |
| H | -2.105795000 | -2.551765000 | 3.731129000  |
| H | -3.345371000 | -1.256456000 | 3.771102000  |
| H | -0.144942000 | -2.860079000 | 2.700626000  |

|   |              |              |             |
|---|--------------|--------------|-------------|
| H | 0.745695000  | -2.630599000 | 1.168813000 |
| H | -0.409909000 | -3.987130000 | 1.334715000 |
| H | 0.011675000  | 2.490483000  | 4.051670000 |
| H | -0.001891000 | 3.201912000  | 2.390595000 |

77

Cp\*Ru(dppm)H2+ long CH<sub>2</sub>Cl<sub>2</sub>, E = -2133.492724

|    |              |              |              |
|----|--------------|--------------|--------------|
| Ru | -1.515559000 | 0.201395000  | 1.034687000  |
| C  | -1.460984000 | -1.619484000 | -0.296720000 |
| C  | -2.724638000 | -0.921002000 | -0.462014000 |
| C  | -3.417090000 | -0.940007000 | 0.807730000  |
| C  | -2.585831000 | -1.670577000 | 1.761092000  |
| C  | -1.387397000 | -2.091809000 | 1.069604000  |
| C  | -0.491094000 | -1.953307000 | -1.393322000 |
| C  | -3.270503000 | -0.390067000 | -1.756290000 |
| C  | -4.832014000 | -0.496983000 | 1.045070000  |
| C  | -3.030109000 | -2.082716000 | 3.136351000  |
| C  | -0.293602000 | -2.961759000 | 1.615010000  |
| C  | -0.254652000 | 2.347227000  | 2.937008000  |
| P  | -2.016432000 | 1.845416000  | 2.581187000  |
| C  | -2.941795000 | 3.355032000  | 2.088265000  |
| C  | -2.962317000 | 4.463399000  | 2.967233000  |
| C  | -3.676516000 | 5.621131000  | 2.615783000  |
| C  | -4.386625000 | 5.671743000  | 1.398256000  |
| C  | -4.377119000 | 4.564924000  | 0.529285000  |
| C  | -3.651279000 | 3.407658000  | 0.871390000  |
| C  | -2.812082000 | 1.447165000  | 4.190440000  |
| C  | -4.223762000 | 1.337913000  | 4.212904000  |
| C  | -4.886713000 | 0.956838000  | 5.391456000  |
| C  | -4.148964000 | 0.687930000  | 6.561590000  |
| C  | -2.748194000 | 0.820867000  | 6.550911000  |
| C  | -2.079792000 | 1.202355000  | 5.372328000  |
| P  | 0.425953000  | 0.802525000  | 2.126784000  |
| C  | 1.922420000  | 1.295589000  | 1.194853000  |
| C  | 2.760055000  | 2.332080000  | 1.664813000  |
| C  | 3.926405000  | 2.665476000  | 0.952091000  |
| C  | 4.263277000  | 1.962806000  | -0.221484000 |
| C  | 3.430680000  | 0.926672000  | -0.688001000 |
| C  | 2.259303000  | 0.595101000  | 0.016022000  |
| C  | 1.076054000  | -0.259388000 | 3.481860000  |
| C  | 0.142871000  | -0.912288000 | 4.316829000  |
| C  | 0.579725000  | -1.717356000 | 5.381189000  |
| C  | 1.959131000  | -1.897232000 | 5.604724000  |
| C  | 2.893879000  | -1.266880000 | 4.761414000  |
| C  | 2.458793000  | -0.446732000 | 3.702834000  |
| H  | -2.422108000 | 4.420037000  | 3.925384000  |
| H  | -3.683217000 | 6.486441000  | 3.295508000  |
| H  | -4.949954000 | 6.577870000  | 1.128880000  |
| H  | -4.934096000 | 4.599576000  | -0.418918000 |
| H  | -3.632767000 | 2.541768000  | 0.193040000  |
| H  | -4.807290000 | 1.566765000  | 3.309773000  |
| H  | -5.983784000 | 0.873441000  | 5.396284000  |
| H  | -4.667751000 | 0.386639000  | 7.483862000  |

|   |              |              |              |
|---|--------------|--------------|--------------|
| H | -2.166095000 | 0.631194000  | 7.465139000  |
| H | -0.987717000 | 1.307148000  | 5.390360000  |
| H | 2.507397000  | 2.878041000  | 2.585973000  |
| H | 4.574374000  | 3.477040000  | 1.315692000  |
| H | 5.176159000  | 2.226573000  | -0.776396000 |
| H | 3.689727000  | 0.378645000  | -1.606199000 |
| H | 1.598007000  | -0.202239000 | -0.352342000 |
| H | -0.928742000 | -0.796352000 | 4.118289000  |
| H | -0.158697000 | -2.213873000 | 6.028538000  |
| H | 2.305369000  | -2.535586000 | 6.431409000  |
| H | 3.972123000  | -1.412475000 | 4.925909000  |
| H | 3.197184000  | 0.041046000  | 3.051813000  |
| H | -1.841422000 | 1.510962000  | 0.181445000  |
| H | -0.589374000 | 0.893742000  | -0.065807000 |
| H | -0.817372000 | -2.878237000 | -1.915257000 |
| H | 0.523477000  | -2.140845000 | -0.996110000 |
| H | -0.427937000 | -1.146166000 | -2.146221000 |
| H | -3.807488000 | -1.198194000 | -2.297162000 |
| H | -3.987006000 | 0.434912000  | -1.586654000 |
| H | -2.464427000 | -0.020560000 | -2.417028000 |
| H | -5.535258000 | -1.284372000 | 0.698775000  |
| H | -5.027242000 | -0.327961000 | 2.118198000  |
| H | -5.074592000 | 0.431340000  | 0.495629000  |
| H | -3.864194000 | -2.811372000 | 3.055777000  |
| H | -2.217405000 | -2.573062000 | 3.700298000  |
| H | -3.400288000 | -1.225171000 | 3.728754000  |
| H | -0.253335000 | -2.934582000 | 2.717175000  |
| H | 0.698538000  | -2.659226000 | 1.230624000  |
| H | -0.467016000 | -4.013763000 | 1.304301000  |
| H | 0.037701000  | 2.557425000  | 3.982311000  |
| H | -0.014591000 | 3.221510000  | 2.300421000  |

73

(p-H-POCOP)IrH2---CH2Cl2 halogen-bonded tol, E = -2758.838475

|    |              |              |              |
|----|--------------|--------------|--------------|
| C  | -0.210377000 | 1.112965000  | -3.708144000 |
| C  | -0.187988000 | 1.187445000  | -2.299397000 |
| C  | -0.179222000 | 0.019197000  | -1.494187000 |
| C  | -0.188751000 | -1.243900000 | -2.140205000 |
| C  | -0.211260000 | -1.352396000 | -3.547180000 |
| C  | -0.222506000 | -0.164270000 | -4.307798000 |
| H  | -0.216115000 | 2.029132000  | -4.315189000 |
| H  | -0.217124000 | -2.339684000 | -4.030033000 |
| H  | -0.239853000 | -0.235993000 | -5.406599000 |
| O  | -0.169174000 | -2.390676000 | -1.375411000 |
| O  | -0.169600000 | 2.425168000  | -1.688876000 |
| P  | -0.102956000 | -2.119941000 | 0.347863000  |
| P  | -0.152896000 | 2.372744000  | 0.053818000  |
| Ir | -0.151079000 | 0.154187000  | 0.579083000  |
| H  | 0.776186000  | 0.250071000  | 1.868554000  |
| H  | -0.828709000 | 0.242113000  | 2.042562000  |
| C  | 1.534873000  | -2.995052000 | 0.723968000  |
| C  | -1.647445000 | -3.102204000 | 0.840444000  |
| C  | 1.445020000  | 3.336581000  | 0.373503000  |

|   |              |              |              |
|---|--------------|--------------|--------------|
| C | -1.745533000 | 3.348139000  | 0.375459000  |
| C | 1.863790000  | -2.805506000 | 2.219607000  |
| H | 2.875776000  | -3.217820000 | 2.416810000  |
| H | 1.861572000  | -1.735255000 | 2.497540000  |
| H | 1.152591000  | -3.326519000 | 2.885027000  |
| C | -1.613442000 | -3.337813000 | 2.363141000  |
| H | -1.396463000 | -2.406859000 | 2.921064000  |
| H | -2.603718000 | -3.714288000 | 2.695195000  |
| H | -0.857921000 | -4.094449000 | 2.647257000  |
| C | 2.583739000  | -2.237080000 | -0.126230000 |
| H | 2.406756000  | -2.376270000 | -1.209452000 |
| H | 2.559986000  | -1.150844000 | 0.091671000  |
| H | 3.593658000  | -2.628158000 | 0.116844000  |
| C | 1.535926000  | -4.486467000 | 0.344217000  |
| H | 2.571363000  | -4.878930000 | 0.428757000  |
| H | 0.899382000  | -5.084808000 | 1.022769000  |
| H | 1.195550000  | -4.641807000 | -0.697309000 |
| C | -1.815708000 | -4.428085000 | 0.073263000  |
| H | -1.060936000 | -5.180989000 | 0.359372000  |
| H | -2.815344000 | -4.849559000 | 0.310645000  |
| H | -1.758320000 | -4.268782000 | -1.019585000 |
| C | -2.821968000 | -2.158702000 | 0.480628000  |
| H | -2.745350000 | -1.199007000 | 1.028197000  |
| H | -2.840173000 | -1.932685000 | -0.603581000 |
| H | -3.779513000 | -2.652601000 | 0.749007000  |
| C | 1.695556000  | 3.374653000  | 1.896691000  |
| H | 1.661838000  | 2.358006000  | 2.333832000  |
| H | 2.702311000  | 3.803017000  | 2.084832000  |
| H | 0.958179000  | 4.005721000  | 2.426888000  |
| C | -1.813930000 | 3.692040000  | 1.877179000  |
| H | -2.832253000 | 4.061031000  | 2.120528000  |
| H | -1.611609000 | 2.801784000  | 2.505800000  |
| H | -1.096150000 | 4.489168000  | 2.150317000  |
| C | 2.547171000  | 2.486031000  | -0.304725000 |
| H | 2.534625000  | 1.445175000  | 0.075084000  |
| H | 2.413992000  | 2.453632000  | -1.402689000 |
| H | 3.537260000  | 2.936791000  | -0.084579000 |
| C | 1.443805000  | 4.756269000  | -0.221047000 |
| H | 0.773005000  | 5.436528000  | 0.336137000  |
| H | 2.469969000  | 5.175698000  | -0.156185000 |
| H | 1.143434000  | 4.750677000  | -1.286140000 |
| C | -1.896492000 | 4.609958000  | -0.495474000 |
| H | -2.925740000 | 5.007796000  | -0.370808000 |
| H | -1.193394000 | 5.410093000  | -0.204855000 |
| H | -1.744387000 | 4.377447000  | -1.566081000 |
| C | -2.871700000 | 2.346275000  | 0.017537000  |
| H | -2.826780000 | 2.053853000  | -1.049564000 |
| H | -2.794594000 | 1.424346000  | 0.627179000  |
| H | -3.855832000 | 2.824221000  | 0.206342000  |
| H | -0.603325000 | -1.154358000 | 6.815084000  |
| C | 0.202782000  | -1.459636000 | 6.125666000  |
| H | 1.200982000  | -1.267431000 | 6.555569000  |

Cl 0.051550000 -3.231809000 5.856475000  
Cl 0.047440000 -0.506757000 4.615224000  
73

(p-H-POCOP)IrH2---CH2Cl2 dihydrogen-bonded tol, E = -2758.843191

C -0.431589000 1.121346000 -3.668785000  
C -0.279029000 1.169425000 -2.267093000  
C -0.185212000 -0.013752000 -1.488849000  
C -0.250615000 -1.263775000 -2.157218000  
C -0.400223000 -1.346286000 -3.557623000  
C -0.487990000 -0.143883000 -4.290757000  
H -0.505272000 2.049014000 -4.253487000  
H -0.449155000 -2.324293000 -4.056631000  
H -0.605283000 -0.194620000 -5.384540000  
O -0.175248000 -2.425004000 -1.416348000  
O -0.227018000 2.394630000 -1.635204000  
P 0.021210000 -2.183577000 0.299656000  
P -0.035695000 2.313989000 0.095397000  
Ir 0.087671000 0.083353000 0.567870000  
H 0.877164000 0.202887000 1.986576000  
H -0.831123000 0.134912000 1.845131000  
C 1.664673000 -3.097906000 0.538549000  
C -1.501703000 -3.144970000 0.892493000  
C 1.556431000 3.329700000 0.246669000  
C -1.609620000 3.222248000 0.622573000  
C 2.093942000 -2.947870000 2.014315000  
H 3.116774000 -3.361887000 2.136279000  
H 2.110611000 -1.881676000 2.312536000  
H 1.425927000 -3.494665000 2.705363000  
C -1.357632000 -3.437029000 2.399069000  
H -1.106622000 -2.522440000 2.969514000  
H -2.325246000 -3.816604000 2.788649000  
H -0.590549000 -4.209252000 2.599060000  
C 2.663847000 -2.324812000 -0.357506000  
H 2.403222000 -2.414565000 -1.428918000  
H 2.683021000 -1.247794000 -0.093561000  
H 3.681430000 -2.741872000 -0.207714000  
C 1.626011000 -4.577984000 0.120601000  
H 2.659864000 -4.983559000 0.128093000  
H 1.026338000 -5.189366000 0.820931000  
H 1.218213000 -4.700355000 -0.900856000  
C -1.747085000 -4.444041000 0.098934000  
H -0.973725000 -5.208677000 0.287996000  
H -2.723350000 -4.869997000 0.412497000  
H -1.788564000 -4.246959000 -0.988202000  
C -2.689119000 -2.178882000 0.658062000  
H -2.581963000 -1.256095000 1.258070000  
H -2.768731000 -1.887341000 -0.407258000  
H -3.630472000 -2.689557000 0.950775000  
C 1.761567000 3.703889000 1.728437000  
H 1.630220000 2.828473000 2.394456000  
H 2.792987000 4.090890000 1.865780000  
H 1.061366000 4.498319000 2.050659000

|    |              |              |              |
|----|--------------|--------------|--------------|
| C  | -1.692009000 | 3.218747000  | 2.163559000  |
| H  | -2.668637000 | 3.649602000  | 2.468830000  |
| H  | -1.624810000 | 2.194267000  | 2.572541000  |
| H  | -0.896018000 | 3.826096000  | 2.631447000  |
| C  | 2.665059000  | 2.345349000  | -0.203863000 |
| H  | 2.681233000  | 1.441819000  | 0.437927000  |
| H  | 2.514295000  | 2.019648000  | -1.251741000 |
| H  | 3.650925000  | 2.851409000  | -0.136140000 |
| C  | 1.592939000  | 4.577830000  | -0.655938000 |
| H  | 0.887928000  | 5.359668000  | -0.323614000 |
| H  | 2.614518000  | 5.011873000  | -0.621067000 |
| H  | 1.363193000  | 4.319157000  | -1.706379000 |
| C  | -1.698639000 | 4.655379000  | 0.067922000  |
| H  | -2.716392000 | 5.054184000  | 0.263232000  |
| H  | -0.977605000 | 5.333655000  | 0.561490000  |
| H  | -1.524934000 | 4.681078000  | -1.024765000 |
| C  | -2.763089000 | 2.363746000  | 0.047774000  |
| H  | -2.758035000 | 2.366779000  | -1.058720000 |
| H  | -2.686192000 | 1.313384000  | 0.390998000  |
| H  | -3.729905000 | 2.783999000  | 0.394742000  |
| H  | 0.022833000  | -0.703299000 | 5.591258000  |
| C  | -0.201666000 | -0.071824000 | 4.714871000  |
| H  | 0.262002000  | -0.436736000 | 3.780252000  |
| Cl | -1.981269000 | -0.094728000 | 4.460324000  |
| Cl | 0.438126000  | 1.572393000  | 5.027376000  |

73

(p-H-POCOP)IrH2---CH2Cl2 dihydrogen-bonded-from-top tol, E = -2758.842669

|    |              |              |              |
|----|--------------|--------------|--------------|
| C  | -0.880512000 | 1.127761000  | -3.576361000 |
| C  | -0.544760000 | 1.170465000  | -2.206753000 |
| C  | -0.380931000 | -0.014005000 | -1.442271000 |
| C  | -0.548770000 | -1.260653000 | -2.099293000 |
| C  | -0.884559000 | -1.338648000 | -3.467142000 |
| C  | -1.047484000 | -0.134391000 | -4.183461000 |
| H  | -1.004800000 | 2.058143000  | -4.147907000 |
| H  | -1.011351000 | -2.315488000 | -3.954426000 |
| H  | -1.309706000 | -0.181263000 | -5.251938000 |
| O  | -0.372382000 | -2.426489000 | -1.382867000 |
| O  | -0.365461000 | 2.393959000  | -1.596776000 |
| P  | 0.073784000  | -2.195355000 | 0.282957000  |
| P  | 0.042156000  | 2.312795000  | 0.093334000  |
| Ir | 0.113031000  | 0.074474000  | 0.574803000  |
| H  | 1.227090000  | 0.132524000  | 1.729749000  |
| H  | -0.230993000 | 0.139767000  | 2.147885000  |
| C  | 1.744359000  | -3.090135000 | 0.258712000  |
| C  | -1.330036000 | -3.174853000 | 1.093872000  |
| C  | 1.696173000  | 3.234474000  | 0.031803000  |
| C  | -1.399408000 | 3.324578000  | 0.788404000  |
| C  | 2.227297000  | -3.265348000 | 1.712799000  |
| H  | 3.289779000  | -3.586642000 | 1.707145000  |
| H  | 2.159380000  | -2.316007000 | 2.280647000  |
| H  | 1.647513000  | -4.040322000 | 2.249584000  |
| C  | -1.164523000 | -3.074677000 | 2.625231000  |

|    |              |              |              |
|----|--------------|--------------|--------------|
| H  | -1.001910000 | -2.031252000 | 2.953547000  |
| H  | -2.083242000 | -3.457279000 | 3.117271000  |
| H  | -0.315052000 | -3.681881000 | 2.989624000  |
| C  | 2.685749000  | -2.116256000 | -0.492291000 |
| H  | 2.338930000  | -1.937342000 | -1.528529000 |
| H  | 2.741350000  | -1.137017000 | 0.020817000  |
| H  | 3.702424000  | -2.559811000 | -0.537006000 |
| C  | 1.717570000  | -4.437996000 | -0.487649000 |
| H  | 2.761406000  | -4.795237000 | -0.612603000 |
| H  | 1.164597000  | -5.216569000 | 0.065922000  |
| H  | 1.268113000  | -4.330755000 | -1.492567000 |
| C  | -1.417272000 | -4.645255000 | 0.647427000  |
| H  | -0.597442000 | -5.255016000 | 1.070027000  |
| H  | -2.372972000 | -5.075921000 | 1.014038000  |
| H  | -1.401560000 | -4.737393000 | -0.455115000 |
| C  | -2.611303000 | -2.427000000 | 0.648604000  |
| H  | -2.532568000 | -1.340960000 | 0.849617000  |
| H  | -2.793838000 | -2.556310000 | -0.434802000 |
| H  | -3.482823000 | -2.833260000 | 1.202756000  |
| C  | 2.133135000  | 3.548909000  | 1.476983000  |
| H  | 2.066952000  | 2.652643000  | 2.125668000  |
| H  | 3.188839000  | 3.891838000  | 1.471659000  |
| H  | 1.522140000  | 4.355095000  | 1.925935000  |
| C  | -1.281724000 | 3.340737000  | 2.327329000  |
| H  | -2.219439000 | 3.743516000  | 2.760980000  |
| H  | -1.126452000 | 2.326334000  | 2.738686000  |
| H  | -0.446927000 | 3.979967000  | 2.670564000  |
| C  | 2.675951000  | 2.217513000  | -0.603745000 |
| H  | 2.737781000  | 1.290823000  | -0.001553000 |
| H  | 2.358883000  | 1.937118000  | -1.626975000 |
| H  | 3.684582000  | 2.677201000  | -0.665169000 |
| C  | 1.666049000  | 4.509728000  | -0.832880000 |
| H  | 1.079771000  | 5.321474000  | -0.368652000 |
| H  | 2.706038000  | 4.878188000  | -0.957508000 |
| H  | 1.251428000  | 4.303326000  | -1.837294000 |
| C  | -1.490464000 | 4.756552000  | 0.231598000  |
| H  | -2.460896000 | 5.199039000  | 0.540611000  |
| H  | -0.689772000 | 5.406862000  | 0.630020000  |
| H  | -1.446082000 | 4.767812000  | -0.874020000 |
| C  | -2.655992000 | 2.528065000  | 0.359105000  |
| H  | -2.795605000 | 2.560893000  | -0.737807000 |
| H  | -2.580535000 | 1.464801000  | 0.659274000  |
| H  | -3.549913000 | 2.966787000  | 0.845536000  |
| H  | -2.356619000 | 0.231658000  | 2.475232000  |
| C  | -2.927768000 | 0.063789000  | 3.407649000  |
| Cl | -4.274755000 | 1.243086000  | 3.485289000  |
| Cl | -1.770368000 | 0.228555000  | 4.770564000  |
| H  | -3.359526000 | -0.949825000 | 3.447826000  |

73

(p-H-POCOP)IrH2---CH2Cl2 halogen-bonded-from-top tol, E = -2758.837837

|   |              |             |              |
|---|--------------|-------------|--------------|
| C | -0.802874000 | 1.107911000 | -3.671930000 |
| C | -0.457066000 | 1.182853000 | -2.306455000 |



|    |              |              |              |
|----|--------------|--------------|--------------|
| C  | -0.285054000 | 0.018165000  | -1.514424000 |
| C  | -0.478501000 | -1.242575000 | -2.135910000 |
| C  | -0.824407000 | -1.354139000 | -3.498698000 |
| C  | -0.979868000 | -0.168170000 | -4.247246000 |
| H  | -0.933125000 | 2.024685000  | -4.264025000 |
| H  | -0.971187000 | -2.342362000 | -3.956864000 |
| H  | -1.249458000 | -0.240716000 | -5.312412000 |
| O  | -0.336140000 | -2.389950000 | -1.379566000 |
| O  | -0.292471000 | 2.421928000  | -1.719277000 |
| P  | 0.100657000  | -2.114858000 | 0.282360000  |
| P  | 0.139609000  | 2.377477000  | -0.034641000 |
| Ir | 0.253756000  | 0.153670000  | 0.490722000  |
| H  | 1.074829000  | 0.255428000  | 1.913541000  |
| H  | -0.650769000 | 0.247484000  | 1.761784000  |
| C  | 1.734890000  | -3.078166000 | 0.297819000  |
| C  | -1.342039000 | -3.004149000 | 1.124823000  |
| C  | 1.789410000  | 3.304686000  | -0.148918000 |
| C  | -1.287363000 | 3.393712000  | 0.677755000  |
| C  | 2.168150000  | -3.294867000 | 1.761366000  |
| H  | 3.218715000  | -3.653108000 | 1.781065000  |
| H  | 2.116304000  | -2.352557000 | 2.342672000  |
| H  | 1.546019000  | -4.058749000 | 2.266193000  |
| C  | -1.208862000 | -2.820027000 | 2.651777000  |
| H  | -1.141395000 | -1.749801000 | 2.923254000  |
| H  | -2.105893000 | -3.251182000 | 3.143807000  |
| H  | -0.323436000 | -3.340190000 | 3.061214000  |
| C  | 2.728441000  | -2.117637000 | -0.403192000 |
| H  | 2.416497000  | -1.900018000 | -1.443356000 |
| H  | 2.805097000  | -1.155709000 | 0.143026000  |
| H  | 3.733032000  | -2.589203000 | -0.433763000 |
| C  | 1.691324000  | -4.409472000 | -0.476235000 |
| H  | 2.724163000  | -4.810597000 | -0.551186000 |
| H  | 1.074157000  | -5.172812000 | 0.028872000  |
| H  | 1.302469000  | -4.263340000 | -1.501100000 |
| C  | -1.433599000 | -4.496397000 | 0.757821000  |
| H  | -0.613339000 | -5.083816000 | 1.211182000  |
| H  | -2.389776000 | -4.905603000 | 1.147039000  |
| H  | -1.418517000 | -4.646967000 | -0.338373000 |
| C  | -2.605849000 | -2.264762000 | 0.622403000  |
| H  | -2.557192000 | -1.183435000 | 0.852623000  |
| H  | -2.734297000 | -2.381778000 | -0.469959000 |
| H  | -3.496728000 | -2.700408000 | 1.121647000  |
| C  | 2.221686000  | 3.719406000  | 1.271583000  |
| H  | 2.151591000  | 2.870366000  | 1.980632000  |
| H  | 3.278075000  | 4.059725000  | 1.246317000  |
| H  | 1.610398000  | 4.556836000  | 1.659078000  |
| C  | -1.148542000 | 3.417488000  | 2.215205000  |
| H  | -2.066100000 | 3.861401000  | 2.654142000  |
| H  | -1.027249000 | 2.396896000  | 2.624731000  |
| H  | -0.286996000 | 4.025505000  | 2.547966000  |
| C  | 2.768723000  | 2.239969000  | -0.703655000 |
| H  | 2.829834000  | 1.364183000  | -0.026247000 |

|    |              |              |              |
|----|--------------|--------------|--------------|
| H  | 2.453941000  | 1.881722000  | -1.703315000 |
| H  | 3.780601000  | 2.686865000  | -0.798062000 |
| C  | 1.765748000  | 4.514425000  | -1.102429000 |
| H  | 1.156910000  | 5.348257000  | -0.711604000 |
| H  | 2.803827000  | 4.888306000  | -1.228517000 |
| H  | 1.377119000  | 4.230816000  | -2.098157000 |
| C  | -1.364500000 | 4.822923000  | 0.111362000  |
| H  | -2.315186000 | 5.290527000  | 0.443768000  |
| H  | -0.536887000 | 5.458382000  | 0.478571000  |
| H  | -1.352517000 | 4.822210000  | -0.995253000 |
| C  | -2.559553000 | 2.605816000  | 0.280721000  |
| H  | -2.708923000 | 2.611621000  | -0.815428000 |
| H  | -2.501673000 | 1.553699000  | 0.618135000  |
| H  | -3.440957000 | 3.080395000  | 0.759358000  |
| C  | -4.112214000 | -0.844553000 | 3.906584000  |
| Cl | -5.650872000 | -0.348695000 | 4.678354000  |
| H  | -4.350835000 | -1.424018000 | 2.999224000  |
| Cl | -3.092252000 | 0.549888000  | 3.411506000  |
| H  | -3.536422000 | -1.443892000 | 4.632035000  |

73

(p-H-POCOP)IrH(CH<sub>2</sub>Cl<sub>2</sub>)H toI, E = -2758.839249

|    |              |              |              |
|----|--------------|--------------|--------------|
| C  | -0.255346000 | 1.089963000  | -3.719145000 |
| C  | -0.286667000 | 1.165807000  | -2.313362000 |
| C  | -0.216784000 | 0.013589000  | -1.492991000 |
| C  | -0.176557000 | -1.240551000 | -2.148808000 |
| C  | -0.142422000 | -1.353653000 | -3.552261000 |
| C  | -0.176656000 | -0.178336000 | -4.330202000 |
| H  | -0.298870000 | 2.013906000  | -4.313219000 |
| H  | -0.099601000 | -2.349808000 | -4.015226000 |
| H  | -0.148854000 | -0.252091000 | -5.427795000 |
| O  | -0.197546000 | -2.396787000 | -1.379382000 |
| O  | -0.409663000 | 2.407754000  | -1.704889000 |
| P  | -0.126992000 | -2.143248000 | 0.314391000  |
| P  | -0.218128000 | 2.391381000  | 0.000568000  |
| Ir | -0.337729000 | 0.145083000  | 0.515127000  |
| H  | 1.293252000  | 0.205529000  | 0.894723000  |
| H  | -1.968161000 | 0.093592000  | 0.185873000  |
| C  | 1.606652000  | -2.865156000 | 0.670521000  |
| C  | -1.511810000 | -3.331756000 | 0.864610000  |
| C  | 1.505876000  | 3.204213000  | 0.125090000  |
| C  | -1.603378000 | 3.601832000  | 0.491653000  |
| C  | 2.013940000  | -2.484705000 | 2.108889000  |
| H  | 3.057176000  | -2.817429000 | 2.290892000  |
| H  | 1.975119000  | -1.387178000 | 2.247922000  |
| H  | 1.374929000  | -2.973640000 | 2.869585000  |
| C  | -1.353884000 | -3.610105000 | 2.373558000  |
| H  | -1.312028000 | -2.668419000 | 2.955623000  |
| H  | -2.235430000 | -4.181019000 | 2.732989000  |
| H  | -0.452494000 | -4.209753000 | 2.600537000  |
| C  | 2.558268000  | -2.166664000 | -0.329908000 |
| H  | 2.357612000  | -2.488593000 | -1.368570000 |
| H  | 2.457887000  | -1.066252000 | -0.273173000 |

|    |              |              |              |
|----|--------------|--------------|--------------|
| H  | 3.603320000  | -2.438880000 | -0.074466000 |
| C  | 1.706341000  | -4.387388000 | 0.462584000  |
| H  | 2.770831000  | -4.689244000 | 0.556313000  |
| H  | 1.135729000  | -4.956282000 | 1.220129000  |
| H  | 1.360746000  | -4.683184000 | -0.546073000 |
| C  | -1.540683000 | -4.645180000 | 0.053568000  |
| H  | -0.686978000 | -5.306791000 | 0.273665000  |
| H  | -2.467892000 | -5.198020000 | 0.313142000  |
| H  | -1.556676000 | -4.439823000 | -1.033052000 |
| C  | -2.843201000 | -2.585369000 | 0.621142000  |
| H  | -2.913210000 | -1.664868000 | 1.227456000  |
| H  | -2.954588000 | -2.295347000 | -0.441512000 |
| H  | -3.682366000 | -3.260844000 | 0.889484000  |
| C  | 2.012874000  | 3.075960000  | 1.574759000  |
| H  | 2.020153000  | 2.016398000  | 1.889177000  |
| H  | 3.050736000  | 3.466763000  | 1.630305000  |
| H  | 1.398500000  | 3.648685000  | 2.294092000  |
| C  | -1.325022000 | 4.109484000  | 1.922924000  |
| H  | -2.212749000 | 4.666827000  | 2.288505000  |
| H  | -1.139641000 | 3.274096000  | 2.626957000  |
| H  | -0.460152000 | 4.797851000  | 1.960658000  |
| C  | 2.421961000  | 2.375947000  | -0.807650000 |
| H  | 2.363556000  | 1.297174000  | -0.568782000 |
| H  | 2.155396000  | 2.518983000  | -1.871226000 |
| H  | 3.469443000  | 2.712458000  | -0.662766000 |
| C  | 1.532389000  | 4.672215000  | -0.339028000 |
| H  | 0.996596000  | 5.345122000  | 0.355909000  |
| H  | 2.588920000  | 5.011883000  | -0.376500000 |
| H  | 1.105792000  | 4.786504000  | -1.353705000 |
| C  | -1.757852000 | 4.775602000  | -0.499426000 |
| H  | -2.667081000 | 5.350225000  | -0.223862000 |
| H  | -0.904402000 | 5.472603000  | -0.477872000 |
| H  | -1.884724000 | 4.406969000  | -1.534418000 |
| C  | -2.920202000 | 2.792293000  | 0.481399000  |
| H  | -3.104429000 | 2.332597000  | -0.508589000 |
| H  | -2.913230000 | 1.980198000  | 1.229781000  |
| H  | -3.760117000 | 3.481100000  | 0.710739000  |
| H  | -0.589371000 | -0.114950000 | 5.168087000  |
| C  | 0.001359000  | -0.208906000 | 4.240646000  |
| H  | 0.279737000  | -1.251039000 | 4.015518000  |
| Cl | -1.124304000 | 0.326149000  | 2.896719000  |
| Cl | 1.470989000  | 0.771582000  | 4.367727000  |

73

(p-H-POCOP)IrH<sub>2</sub>(CH<sub>2</sub>Cl)<sub>2</sub>-iso1 tol, E = -2758.837133

|   |              |              |              |
|---|--------------|--------------|--------------|
| C | -0.672956000 | 1.091817000  | -3.665240000 |
| C | -0.447818000 | 1.152484000  | -2.273734000 |
| C | -0.127198000 | 0.007408000  | -1.514318000 |
| C | -0.116667000 | -1.235376000 | -2.184974000 |
| C | -0.333771000 | -1.343573000 | -3.572945000 |
| C | -0.600740000 | -0.164680000 | -4.302478000 |
| H | -0.905428000 | 2.006669000  | -4.229218000 |
| H | -0.306441000 | -2.326875000 | -4.064230000 |

|    |              |              |              |
|----|--------------|--------------|--------------|
| H  | -0.772097000 | -0.229397000 | -5.388143000 |
| O  | 0.098875000  | -2.391406000 | -1.436387000 |
| O  | -0.552463000 | 2.377879000  | -1.625088000 |
| P  | 0.029466000  | -2.144820000 | 0.270832000  |
| P  | -0.180075000 | 2.364767000  | 0.061097000  |
| Ir | 0.244960000  | 0.144701000  | 0.544857000  |
| H  | 0.445311000  | 0.248621000  | 2.207398000  |
| H  | -1.251279000 | 0.095552000  | 0.897780000  |
| C  | 1.370305000  | -3.379641000 | 0.846980000  |
| C  | -1.729113000 | -2.829488000 | 0.602348000  |
| C  | 1.228659000  | 3.653271000  | 0.054772000  |
| C  | -1.797021000 | 3.124351000  | 0.734033000  |
| C  | 1.750505000  | -2.964818000 | 2.287123000  |
| H  | 2.559451000  | -3.631710000 | 2.652756000  |
| H  | 2.106657000  | -1.920202000 | 2.330101000  |
| H  | 0.893947000  | -3.058671000 | 2.982444000  |
| C  | -1.938970000 | -2.909207000 | 2.127449000  |
| H  | -1.728773000 | -1.934459000 | 2.611326000  |
| H  | -2.993963000 | -3.181105000 | 2.341448000  |
| H  | -1.294337000 | -3.677635000 | 2.596178000  |
| C  | 2.573761000  | -3.193620000 | -0.102441000 |
| H  | 2.342225000  | -3.559417000 | -1.119276000 |
| H  | 2.868969000  | -2.137433000 | -0.183043000 |
| H  | 3.436349000  | -3.766646000 | 0.297598000  |
| C  | 0.980299000  | -4.869280000 | 0.828497000  |
| H  | 1.877666000  | -5.462018000 | 1.106106000  |
| H  | 0.190137000  | -5.109852000 | 1.562869000  |
| H  | 0.657213000  | -5.202238000 | -0.174907000 |
| C  | -1.976711000 | -4.194007000 | -0.080937000 |
| H  | -1.489632000 | -5.033915000 | 0.437714000  |
| H  | -3.068026000 | -4.394824000 | -0.077317000 |
| H  | -1.638332000 | -4.177843000 | -1.134292000 |
| C  | -2.742066000 | -1.835112000 | -0.014511000 |
| H  | -2.726971000 | -0.853173000 | 0.485774000  |
| H  | -2.556153000 | -1.670609000 | -1.092710000 |
| H  | -3.760730000 | -2.259388000 | 0.101701000  |
| C  | 1.933561000  | 3.592795000  | 1.427671000  |
| H  | 2.294162000  | 2.575184000  | 1.657914000  |
| H  | 2.807178000  | 4.278480000  | 1.415412000  |
| H  | 1.265748000  | 3.914305000  | 2.248721000  |
| C  | -1.547669000 | 3.602315000  | 2.179169000  |
| H  | -2.515950000 | 3.885204000  | 2.642638000  |
| H  | -1.095425000 | 2.798988000  | 2.794909000  |
| H  | -0.888518000 | 4.490127000  | 2.217587000  |
| C  | 2.176155000  | 3.180937000  | -1.073558000 |
| H  | 2.312984000  | 2.087703000  | -1.069405000 |
| H  | 1.772058000  | 3.450771000  | -2.066410000 |
| H  | 3.167063000  | 3.665365000  | -0.949982000 |
| C  | 0.809699000  | 5.102675000  | -0.251843000 |
| H  | 0.214673000  | 5.553642000  | 0.563755000  |
| H  | 1.730220000  | 5.714397000  | -0.364640000 |
| H  | 0.241825000  | 5.173765000  | -1.198274000 |

|    |              |              |              |
|----|--------------|--------------|--------------|
| C  | -2.331909000 | 4.268032000  | -0.156386000 |
| H  | -3.337115000 | 4.558753000  | 0.213914000  |
| H  | -1.698394000 | 5.168419000  | -0.130949000 |
| H  | -2.433748000 | 3.937679000  | -1.206924000 |
| C  | -2.867112000 | 2.008654000  | 0.742522000  |
| H  | -2.955070000 | 1.516159000  | -0.245289000 |
| H  | -2.647605000 | 1.238746000  | 1.504745000  |
| H  | -3.849643000 | 2.460276000  | 0.991638000  |
| H  | 4.503377000  | 1.225308000  | -0.677706000 |
| C  | 4.084890000  | 0.205835000  | -0.631070000 |
| H  | 4.843080000  | -0.549315000 | -0.360734000 |
| Cl | 2.862007000  | 0.211372000  | 0.758750000  |
| Cl | 3.346640000  | -0.208398000 | -2.184238000 |

73

(p-H-POCOP)IrH<sub>2</sub>(CH<sub>2</sub>Cl)<sub>2</sub>-iso2 tol, E = -2758.834485

|    |              |              |              |
|----|--------------|--------------|--------------|
| C  | -0.623625000 | 1.090182000  | -3.639319000 |
| C  | -0.404673000 | 1.172196000  | -2.247487000 |
| C  | -0.044874000 | 0.045039000  | -1.477327000 |
| C  | 0.015521000  | -1.202424000 | -2.137344000 |
| C  | -0.195666000 | -1.331073000 | -3.525426000 |
| C  | -0.503402000 | -0.168740000 | -4.265207000 |
| H  | -0.891601000 | 1.989767000  | -4.211999000 |
| H  | -0.137596000 | -2.317664000 | -4.007303000 |
| H  | -0.669495000 | -0.248820000 | -5.350617000 |
| O  | 0.245846000  | -2.345540000 | -1.371017000 |
| O  | -0.569806000 | 2.394679000  | -1.607642000 |
| P  | 0.078649000  | -2.080451000 | 0.329239000  |
| P  | -0.210614000 | 2.412885000  | 0.083350000  |
| Ir | 0.261219000  | 0.206807000  | 0.601266000  |
| H  | 0.441636000  | 0.338127000  | 2.253214000  |
| H  | -1.236821000 | 0.144989000  | 0.957582000  |
| C  | 1.403738000  | -3.291057000 | 0.991833000  |
| C  | -1.691142000 | -2.765889000 | 0.569960000  |
| C  | 1.151012000  | 3.761885000  | 0.090617000  |
| C  | -1.864030000 | 3.116072000  | 0.732904000  |
| C  | 1.735721000  | -2.801263000 | 2.419893000  |
| H  | 2.601819000  | -3.373024000 | 2.814644000  |
| H  | 1.967255000  | -1.721879000 | 2.446670000  |
| H  | 0.883084000  | -2.961070000 | 3.108916000  |
| C  | -2.015458000 | -2.720804000 | 2.076512000  |
| H  | -1.879698000 | -1.699664000 | 2.484494000  |
| H  | -3.071677000 | -3.022878000 | 2.237191000  |
| H  | -1.376983000 | -3.414172000 | 2.658571000  |
| C  | 2.627861000  | -3.155566000 | 0.056712000  |
| H  | 2.428542000  | -3.629967000 | -0.921785000 |
| H  | 2.900405000  | -2.105138000 | -0.140157000 |
| H  | 3.495580000  | -3.665769000 | 0.525334000  |
| C  | 1.022104000  | -4.781856000 | 1.048636000  |
| H  | 1.911632000  | -5.351163000 | 1.393105000  |
| H  | 0.207904000  | -4.981319000 | 1.768836000  |
| H  | 0.735058000  | -5.178028000 | 0.057642000  |
| C  | -1.878692000 | -4.185647000 | -0.011399000 |

|    |              |              |              |
|----|--------------|--------------|--------------|
| H  | -1.471421000 | -4.976617000 | 0.637600000  |
| H  | -2.966000000 | -4.378818000 | -0.120517000 |
| H  | -1.419710000 | -4.269125000 | -1.015025000 |
| C  | -2.652513000 | -1.838507000 | -0.211984000 |
| H  | -2.582519000 | -0.786270000 | 0.106753000  |
| H  | -2.454147000 | -1.874565000 | -1.299717000 |
| H  | -3.691065000 | -2.188428000 | -0.037554000 |
| C  | 1.911550000  | 3.617275000  | 1.426040000  |
| H  | 2.309514000  | 2.598440000  | 1.564926000  |
| H  | 2.760473000  | 4.333091000  | 1.443721000  |
| H  | 1.261818000  | 3.841607000  | 2.294057000  |
| C  | -1.657545000 | 3.542566000  | 2.200786000  |
| H  | -2.637947000 | 3.813621000  | 2.645595000  |
| H  | -1.225627000 | 2.714112000  | 2.797307000  |
| H  | -0.994672000 | 4.423823000  | 2.292695000  |
| C  | 2.073908000  | 3.444787000  | -1.110760000 |
| H  | 2.382471000  | 2.387017000  | -1.149757000 |
| H  | 1.572679000  | 3.687045000  | -2.065739000 |
| H  | 2.992892000  | 4.061966000  | -1.026325000 |
| C  | 0.670283000  | 5.216034000  | -0.073057000 |
| H  | 0.064107000  | 5.564588000  | 0.783091000  |
| H  | 1.566328000  | 5.870337000  | -0.128108000 |
| H  | 0.095960000  | 5.358722000  | -1.007046000 |
| C  | -2.403163000 | 4.277208000  | -0.132873000 |
| H  | -3.439290000 | 4.505461000  | 0.192898000  |
| H  | -1.816538000 | 5.202868000  | -0.031255000 |
| H  | -2.434794000 | 3.992632000  | -1.201439000 |
| C  | -2.913354000 | 1.982001000  | 0.672513000  |
| H  | -2.967753000 | 1.527695000  | -0.335746000 |
| H  | -2.703260000 | 1.186343000  | 1.410009000  |
| H  | -3.909325000 | 2.408334000  | 0.912349000  |
| H  | 4.961096000  | 0.413550000  | 1.203480000  |
| C  | 4.004160000  | -0.046771000 | 1.502536000  |
| H  | 4.066228000  | -1.146202000 | 1.560512000  |
| Cl | 3.504515000  | 0.592352000  | 3.073925000  |
| Cl | 2.850022000  | 0.340628000  | 0.136251000  |

82

"long"-[Cp\*Ru(dppm)(H<sub>2</sub>)]+ --- Cl-CH<sub>2</sub>Cl in CH<sub>2</sub>Cl<sub>2</sub>, E = -3092,72675

|    |              |              |              |
|----|--------------|--------------|--------------|
| Ru | -1.531201000 | -0.049740000 | 0.965214000  |
| C  | -1.453798000 | -2.000408000 | -0.159780000 |
| C  | -2.763361000 | -1.390769000 | -0.311644000 |
| C  | -3.374703000 | -1.303604000 | 0.998886000  |
| C  | -2.442508000 | -1.876699000 | 1.965839000  |
| C  | -1.274245000 | -2.321966000 | 1.240361000  |
| C  | -0.517397000 | -2.382775000 | -1.269922000 |
| C  | -3.418430000 | -1.029272000 | -1.614026000 |
| C  | -4.798612000 | -0.917712000 | 1.277553000  |
| C  | -2.745822000 | -2.120458000 | 3.416311000  |
| C  | -0.115362000 | -3.093976000 | 1.794752000  |
| C  | -0.176582000 | 2.163664000  | 2.756246000  |
| P  | -1.949367000 | 1.724621000  | 2.385442000  |
| C  | -2.743427000 | 3.246825000  | 1.729953000  |

|   |              |              |              |
|---|--------------|--------------|--------------|
| C | -2.426287000 | 4.499952000  | 2.297763000  |
| C | -3.005453000 | 5.669636000  | 1.777032000  |
| C | -3.917213000 | 5.590988000  | 0.705429000  |
| C | -4.250297000 | 4.339511000  | 0.153730000  |
| C | -3.659154000 | 3.167836000  | 0.660999000  |
| C | -2.837969000 | 1.502049000  | 3.981750000  |
| C | -4.250235000 | 1.418087000  | 3.925642000  |
| C | -4.993117000 | 1.165798000  | 5.090915000  |
| C | -4.335939000 | 1.002199000  | 6.326771000  |
| C | -2.935100000 | 1.114360000  | 6.392940000  |
| C | -2.186852000 | 1.366893000  | 5.227110000  |
| P | 0.468524000  | 0.654503000  | 1.863487000  |
| C | 1.873578000  | 1.214931000  | 0.828689000  |
| C | 2.854985000  | 2.062954000  | 1.391576000  |
| C | 3.943367000  | 2.488819000  | 0.610603000  |
| C | 4.059836000  | 2.064467000  | -0.728797000 |
| C | 3.086456000  | 1.213233000  | -1.287568000 |
| C | 1.992544000  | 0.789727000  | -0.510282000 |
| C | 1.265214000  | -0.404527000 | 3.135796000  |
| C | 0.518257000  | -0.754827000 | 4.283104000  |
| C | 1.062503000  | -1.615248000 | 5.249961000  |
| C | 2.351882000  | -2.154681000 | 5.066160000  |
| C | 3.091030000  | -1.824889000 | 3.915055000  |
| C | 2.554383000  | -0.949681000 | 2.951040000  |
| H | -1.716000000 | 4.568343000  | 3.135205000  |
| H | -2.740194000 | 6.647322000  | 2.206700000  |
| H | -4.366946000 | 6.509181000  | 0.298330000  |
| H | -4.963615000 | 4.274061000  | -0.681499000 |
| H | -3.893753000 | 2.190205000  | 0.213910000  |
| H | -4.771779000 | 1.563851000  | 2.969089000  |
| H | -6.089991000 | 1.100672000  | 5.033638000  |
| H | -4.917491000 | 0.801068000  | 7.238813000  |
| H | -2.415582000 | 1.011210000  | 7.357363000  |
| H | -1.097247000 | 1.471089000  | 5.308792000  |
| H | 2.767773000  | 2.396275000  | 2.436174000  |
| H | 4.697105000  | 3.161636000  | 1.045583000  |
| H | 4.909886000  | 2.403228000  | -1.339781000 |
| H | 3.174084000  | 0.883367000  | -2.333323000 |
| H | 1.221153000  | 0.136317000  | -0.943549000 |
| H | -0.504075000 | -0.376774000 | 4.407194000  |
| H | 0.473009000  | -1.875990000 | 6.141729000  |
| H | 2.776536000  | -2.836510000 | 5.818078000  |
| H | 4.094680000  | -2.249494000 | 3.762717000  |
| H | 3.139866000  | -0.697314000 | 2.056000000  |
| H | -2.043317000 | 1.117808000  | 0.012699000  |
| H | -0.753427000 | 0.612658000  | -0.260094000 |
| H | -0.743736000 | -3.410893000 | -1.625118000 |
| H | 0.535539000  | -2.372349000 | -0.931433000 |
| H | -0.609989000 | -1.698979000 | -2.133867000 |
| H | -3.939320000 | -1.916766000 | -2.032315000 |
| H | -4.169215000 | -0.228353000 | -1.481932000 |
| H | -2.677184000 | -0.690051000 | -2.361400000 |

|    |              |              |              |
|----|--------------|--------------|--------------|
| H  | -5.471461000 | -1.769636000 | 1.040738000  |
| H  | -4.947035000 | -0.664026000 | 2.341349000  |
| H  | -5.123365000 | -0.056977000 | 0.663732000  |
| H  | -3.431489000 | -2.988171000 | 3.520387000  |
| H  | -1.829859000 | -2.347185000 | 3.989777000  |
| H  | -3.239514000 | -1.248298000 | 3.883416000  |
| H  | -0.007508000 | -2.957496000 | 2.883905000  |
| H  | 0.838167000  | -2.803445000 | 1.316875000  |
| H  | -0.272474000 | -4.175840000 | 1.598213000  |
| H  | 0.121016000  | 2.270274000  | 3.815145000  |
| H  | 0.108725000  | 3.078334000  | 2.202144000  |
| H  | 1.928269000  | 3.799558000  | -0.697459000 |
| C  | 1.079872000  | 4.492049000  | -0.570457000 |
| H  | 1.087500000  | 5.304392000  | -1.316669000 |
| Cl | -0.436402000 | 3.557850000  | -0.764072000 |
| Cl | 1.220066000  | 5.240570000  | 1.059055000  |

82

"long"-[Cp\*Ru(dppm)(H<sub>2</sub>)]+ --- H-CHCl<sub>2</sub> in CH<sub>2</sub>Cl<sub>2</sub>, E = -3092,723151

|    |              |              |              |
|----|--------------|--------------|--------------|
| Ru | -1.546613000 | 0.144520000  | 1.013886000  |
| C  | -1.545592000 | -1.702616000 | -0.281004000 |
| C  | -2.788908000 | -0.968540000 | -0.455018000 |
| C  | -3.477245000 | -0.949129000 | 0.816748000  |
| C  | -2.664590000 | -1.690501000 | 1.778729000  |
| C  | -1.482911000 | -2.159513000 | 1.090531000  |
| C  | -0.588281000 | -2.082594000 | -1.373776000 |
| C  | -3.317270000 | -0.437164000 | -1.756584000 |
| C  | -4.876165000 | -0.460904000 | 1.058638000  |
| C  | -3.119351000 | -2.064632000 | 3.161418000  |
| C  | -0.415744000 | -3.063234000 | 1.635201000  |
| C  | -0.262541000 | 2.321220000  | 2.873362000  |
| P  | -2.025694000 | 1.820950000  | 2.529761000  |
| C  | -2.939708000 | 3.324957000  | 2.009818000  |
| C  | -2.895237000 | 4.473375000  | 2.833442000  |
| C  | -3.583200000 | 5.636240000  | 2.447434000  |
| C  | -4.330286000 | 5.651332000  | 1.251572000  |
| C  | -4.384779000 | 4.503921000  | 0.438516000  |
| C  | -3.685221000 | 3.342215000  | 0.814349000  |
| C  | -2.811076000 | 1.433786000  | 4.144019000  |
| C  | -4.225402000 | 1.414105000  | 4.207529000  |
| C  | -4.875029000 | 1.021187000  | 5.390161000  |
| C  | -4.121146000 | 0.650610000  | 6.521334000  |
| C  | -2.715236000 | 0.692860000  | 6.469675000  |
| C  | -2.060088000 | 1.085282000  | 5.287843000  |
| P  | 0.405734000  | 0.767654000  | 2.076880000  |
| C  | 1.866808000  | 1.236922000  | 1.077907000  |
| C  | 2.570699000  | 2.441021000  | 1.293925000  |
| C  | 3.660537000  | 2.771350000  | 0.467077000  |
| C  | 4.058544000  | 1.899189000  | -0.563130000 |
| C  | 3.367667000  | 0.688751000  | -0.769531000 |
| C  | 2.270548000  | 0.359575000  | 0.045085000  |
| C  | 1.104073000  | -0.249336000 | 3.439605000  |
| C  | 0.214280000  | -1.004294000 | 4.233187000  |



|    |              |              |              |
|----|--------------|--------------|--------------|
| C  | 0.693274000  | -1.756876000 | 5.318292000  |
| C  | 2.072204000  | -1.773222000 | 5.605540000  |
| C  | 2.965858000  | -1.032667000 | 4.807159000  |
| C  | 2.487667000  | -0.268659000 | 3.726209000  |
| H  | -2.321849000 | 4.459647000  | 3.773094000  |
| H  | -3.538436000 | 6.533859000  | 3.082318000  |
| H  | -4.870621000 | 6.562608000  | 0.953887000  |
| H  | -4.967568000 | 4.512801000  | -0.494623000 |
| H  | -3.704232000 | 2.448267000  | 0.174355000  |
| H  | -4.819782000 | 1.719442000  | 3.334421000  |
| H  | -5.974540000 | 1.007841000  | 5.428417000  |
| H  | -4.630298000 | 0.340246000  | 7.445961000  |
| H  | -2.119426000 | 0.422616000  | 7.354361000  |
| H  | -0.963553000 | 1.118693000  | 5.271836000  |
| H  | 2.268134000  | 3.129792000  | 2.095433000  |
| H  | 4.193031000  | 3.721015000  | 0.623135000  |
| H  | 4.902362000  | 2.168666000  | -1.215229000 |
| H  | 3.672949000  | 0.006505000  | -1.576679000 |
| H  | 1.709790000  | -0.569382000 | -0.132864000 |
| H  | -0.854514000 | -0.998414000 | 3.988929000  |
| H  | -0.010435000 | -2.337435000 | 5.933534000  |
| H  | 2.452250000  | -2.368644000 | 6.449259000  |
| H  | 4.044208000  | -1.048645000 | 5.025707000  |
| H  | 3.190901000  | 0.307920000  | 3.108710000  |
| H  | -1.847636000 | 1.455197000  | 0.159318000  |
| H  | -0.613546000 | 0.746595000  | -0.124700000 |
| H  | -0.937924000 | -3.011900000 | -1.872326000 |
| H  | 0.424153000  | -2.283116000 | -0.977564000 |
| H  | -0.511949000 | -1.294768000 | -2.145765000 |
| H  | -3.872577000 | -1.235749000 | -2.292879000 |
| H  | -4.012411000 | 0.408000000  | -1.597988000 |
| H  | -2.499109000 | -0.094312000 | -2.417034000 |
| H  | -5.603128000 | -1.255958000 | 0.786667000  |
| H  | -5.040020000 | -0.213124000 | 2.121859000  |
| H  | -5.115392000 | 0.431153000  | 0.451396000  |
| H  | -3.985590000 | -2.756074000 | 3.094345000  |
| H  | -2.327177000 | -2.584188000 | 3.729086000  |
| H  | -3.446879000 | -1.184031000 | 3.744322000  |
| H  | -0.442265000 | -3.121789000 | 2.736253000  |
| H  | 0.595842000  | -2.729665000 | 1.336740000  |
| H  | -0.560400000 | -4.088824000 | 1.234985000  |
| H  | 0.034304000  | 2.534073000  | 3.916709000  |
| H  | -0.032039000 | 3.190461000  | 2.228160000  |
| H  | 1.030605000  | 2.322897000  | -1.127219000 |
| C  | 0.536574000  | 3.178768000  | -1.614835000 |
| H  | -0.198112000 | 2.858965000  | -2.372959000 |
| Cl | -0.350107000 | 4.098112000  | -0.346939000 |
| Cl | 1.796401000  | 4.157982000  | -2.428344000 |

82

"short"-[Cp\*Ru(dppm)(H<sub>2</sub>)]+ --- Cl-CH<sub>2</sub>Cl in CH<sub>2</sub>Cl<sub>2</sub>, E = -3092,726692

|    |              |              |              |
|----|--------------|--------------|--------------|
| Ru | -1.650537000 | -0.024275000 | 1.042150000  |
| C  | -1.598345000 | -1.959886000 | -0.098028000 |

|   |              |              |              |
|---|--------------|--------------|--------------|
| C | -2.914368000 | -1.351790000 | -0.225956000 |
| C | -3.505131000 | -1.268558000 | 1.089865000  |
| C | -2.551983000 | -1.831450000 | 2.044294000  |
| C | -1.394803000 | -2.279454000 | 1.297909000  |
| C | -0.682868000 | -2.340370000 | -1.226332000 |
| C | -3.585272000 | -0.979459000 | -1.517172000 |
| C | -4.923193000 | -0.881651000 | 1.394069000  |
| C | -2.835315000 | -2.078969000 | 3.498261000  |
| C | -0.226505000 | -3.047979000 | 1.837539000  |
| C | -0.309040000 | 2.192345000  | 2.836174000  |
| P | -2.081577000 | 1.758186000  | 2.447963000  |
| C | -2.858176000 | 3.274921000  | 1.759875000  |
| C | -2.551211000 | 4.537906000  | 2.310856000  |
| C | -3.111633000 | 5.698912000  | 1.751532000  |
| C | -3.995428000 | 5.601919000  | 0.658154000  |
| C | -4.319462000 | 4.340857000  | 0.123003000  |
| C | -3.746136000 | 3.177662000  | 0.668802000  |
| C | -2.989090000 | 1.555468000  | 4.035609000  |
| C | -4.402480000 | 1.504770000  | 3.970238000  |
| C | -5.158383000 | 1.265135000  | 5.129922000  |
| C | -4.513310000 | 1.081188000  | 6.369262000  |
| C | -3.110618000 | 1.159943000  | 6.444680000  |
| C | -2.349472000 | 1.399292000  | 5.284512000  |
| P | 0.342831000  | 0.679952000  | 1.949348000  |
| C | 1.742902000  | 1.245454000  | 0.908783000  |
| C | 2.732498000  | 2.088360000  | 1.465131000  |
| C | 3.814944000  | 2.513043000  | 0.675379000  |
| C | 3.917367000  | 2.093011000  | -0.666704000 |
| C | 2.935744000  | 1.247423000  | -1.219462000 |
| C | 1.847881000  | 0.824840000  | -0.432992000 |
| C | 1.149403000  | -0.373081000 | 3.219597000  |
| C | 0.413936000  | -0.717789000 | 4.375944000  |
| C | 0.963731000  | -1.581910000 | 5.336529000  |
| C | 2.247619000  | -2.129162000 | 5.138253000  |
| C | 2.976029000  | -1.803404000 | 3.979127000  |
| C | 2.433446000  | -0.925684000 | 3.020886000  |
| H | -1.861891000 | 4.620642000  | 3.164405000  |
| H | -2.853350000 | 6.684230000  | 2.167814000  |
| H | -4.430177000 | 6.513453000  | 0.220909000  |
| H | -5.010816000 | 4.261384000  | -0.729323000 |
| H | -3.970330000 | 2.191332000  | 0.235406000  |
| H | -4.914337000 | 1.666580000  | 3.011033000  |
| H | -6.256124000 | 1.226147000  | 5.065541000  |
| H | -5.105370000 | 0.890385000  | 7.276768000  |
| H | -2.599704000 | 1.040442000  | 7.411826000  |
| H | -1.258290000 | 1.477216000  | 5.372823000  |
| H | 2.656361000  | 2.417666000  | 2.511853000  |
| H | 4.575394000  | 3.181550000  | 1.105354000  |
| H | 4.762965000  | 2.430914000  | -1.284309000 |
| H | 3.012474000  | 0.920972000  | -2.267159000 |
| H | 1.070408000  | 0.174142000  | -0.859700000 |
| H | -0.603961000 | -0.332365000 | 4.512343000  |

|    |              |              |              |
|----|--------------|--------------|--------------|
| H  | 0.382917000  | -1.838639000 | 6.235117000  |
| H  | 2.676625000  | -2.813513000 | 5.885411000  |
| H  | 3.975593000  | -2.233598000 | 3.815915000  |
| H  | 3.009927000  | -0.677421000 | 2.118885000  |
| H  | -2.009242000 | 1.158150000  | 0.004006000  |
| H  | -0.944531000 | 0.713030000  | -0.210942000 |
| H  | -0.924630000 | -3.361956000 | -1.590453000 |
| H  | 0.375083000  | -2.343842000 | -0.903597000 |
| H  | -0.780938000 | -1.646264000 | -2.081601000 |
| H  | -4.113677000 | -1.862701000 | -1.935071000 |
| H  | -4.333213000 | -0.178359000 | -1.370100000 |
| H  | -2.853385000 | -0.637410000 | -2.272582000 |
| H  | -5.599103000 | -1.737765000 | 1.182047000  |
| H  | -5.049635000 | -0.615587000 | 2.457695000  |
| H  | -5.263018000 | -0.028936000 | 0.777078000  |
| H  | -3.514787000 | -2.950582000 | 3.610442000  |
| H  | -1.910951000 | -2.300960000 | 4.059987000  |
| H  | -3.327488000 | -1.209614000 | 3.972401000  |
| H  | -0.095867000 | -2.897732000 | 2.922433000  |
| H  | 0.717534000  | -2.765443000 | 1.336565000  |
| H  | -0.390423000 | -4.131900000 | 1.658838000  |
| H  | -0.023381000 | 2.295169000  | 3.898931000  |
| H  | -0.013568000 | 3.107996000  | 2.288814000  |
| H  | 1.803246000  | 3.818092000  | -0.612080000 |
| C  | 0.972020000  | 4.533005000  | -0.497647000 |
| H  | 1.017999000  | 5.350253000  | -1.237065000 |
| Cl | -0.565835000 | 3.644172000  | -0.734835000 |
| Cl | 1.096045000  | 5.265200000  | 1.139866000  |

82

"short"-[Cp\*Ru(dppm)(H<sub>2</sub>)]<sup>+</sup> --- BF<sub>4</sub><sup>-</sup> isomer a in CH<sub>2</sub>Cl<sub>2</sub>, E = -2557,649423

|    |              |              |              |
|----|--------------|--------------|--------------|
| Ru | -1.686282000 | 1.087952000  | 1.108111000  |
| C  | -1.661963000 | -0.527979000 | -0.434003000 |
| C  | -2.915101000 | 0.212835000  | -0.518668000 |
| C  | -3.620275000 | 0.051154000  | 0.727409000  |
| C  | -2.807880000 | -0.796577000 | 1.598996000  |
| C  | -1.607839000 | -1.158243000 | 0.867266000  |
| C  | -0.693035000 | -0.699491000 | -1.569762000 |
| C  | -3.395953000 | 0.952473000  | -1.734810000 |
| C  | -5.010448000 | 0.539815000  | 1.020754000  |
| C  | -3.270340000 | -1.361874000 | 2.913390000  |
| C  | -0.533413000 | -2.098322000 | 1.333168000  |
| C  | -0.436023000 | 3.224892000  | 2.975393000  |
| P  | -2.200326000 | 2.673027000  | 2.700683000  |
| C  | -3.201398000 | 4.164204000  | 2.294780000  |
| C  | -3.597652000 | 5.060091000  | 3.316120000  |
| C  | -4.317013000 | 6.222711000  | 2.989290000  |
| C  | -4.646003000 | 6.496722000  | 1.645779000  |
| C  | -4.250797000 | 5.606544000  | 0.629756000  |
| C  | -3.531168000 | 4.440631000  | 0.951295000  |
| C  | -2.869789000 | 2.171991000  | 4.336694000  |
| C  | -4.260449000 | 1.925421000  | 4.438797000  |
| C  | -4.812961000 | 1.455025000  | 5.641892000  |

|   |              |              |              |
|---|--------------|--------------|--------------|
| C | -3.983606000 | 1.226437000  | 6.758294000  |
| C | -2.603828000 | 1.486524000  | 6.667508000  |
| C | -2.047942000 | 1.961337000  | 5.464765000  |
| P | 0.236058000  | 1.633789000  | 2.250184000  |
| C | 1.769358000  | 2.053470000  | 1.342427000  |
| C | 2.544803000  | 3.186503000  | 1.667969000  |
| C | 3.718747000  | 3.462350000  | 0.943252000  |
| C | 4.121048000  | 2.608964000  | -0.102448000 |
| C | 3.345067000  | 1.479525000  | -0.428721000 |
| C | 2.168757000  | 1.205502000  | 0.288423000  |
| C | 0.822181000  | 0.613530000  | 3.667265000  |
| C | -0.112813000 | -0.217955000 | 4.319439000  |
| C | 0.270957000  | -0.986034000 | 5.431860000  |
| C | 1.600627000  | -0.936547000 | 5.893132000  |
| C | 2.541154000  | -0.115375000 | 5.239515000  |
| C | 2.157186000  | 0.659134000  | 4.128927000  |
| H | -3.345768000 | 4.847239000  | 4.365695000  |
| H | -4.622058000 | 6.918107000  | 3.786056000  |
| H | -5.210641000 | 7.407077000  | 1.392877000  |
| H | -4.497400000 | 5.817623000  | -0.421670000 |
| H | -3.208866000 | 3.759570000  | 0.152129000  |
| H | -4.915307000 | 2.118184000  | 3.577233000  |
| H | -5.895304000 | 1.267558000  | 5.707808000  |
| H | -4.415027000 | 0.853924000  | 7.699571000  |
| H | -1.949996000 | 1.320970000  | 7.536951000  |
| H | -0.970141000 | 2.158598000  | 5.416369000  |
| H | 2.235141000  | 3.858480000  | 2.481778000  |
| H | 4.319654000  | 4.349450000  | 1.194745000  |
| H | 5.037816000  | 2.829801000  | -0.670049000 |
| H | 3.649803000  | 0.818234000  | -1.253900000 |
| H | 1.540080000  | 0.346103000  | 0.017975000  |
| H | -1.144145000 | -0.244247000 | 3.948279000  |
| H | -0.469732000 | -1.624142000 | 5.936965000  |
| H | 1.906825000  | -1.541460000 | 6.760060000  |
| H | 3.582246000  | -0.078483000 | 5.594593000  |
| H | 2.897172000  | 1.293775000  | 3.620714000  |
| H | -1.668731000 | 2.494313000  | 0.263538000  |
| H | -0.816361000 | 1.985278000  | 0.047113000  |
| H | -1.107575000 | -1.402023000 | -2.324252000 |
| H | 0.270104000  | -1.116562000 | -1.222405000 |
| H | -0.491579000 | 0.265169000  | -2.070673000 |
| H | -3.766601000 | 0.233396000  | -2.496153000 |
| H | -4.224027000 | 1.640627000  | -1.483819000 |
| H | -2.584980000 | 1.552131000  | -2.185793000 |
| H | -5.759764000 | -0.104853000 | 0.513697000  |
| H | -5.225049000 | 0.509412000  | 2.103254000  |
| H | -5.163809000 | 1.576710000  | 0.666668000  |
| H | -4.100126000 | -2.081761000 | 2.747840000  |
| H | -2.461411000 | -1.908724000 | 3.430425000  |
| H | -3.646696000 | -0.574647000 | 3.593973000  |
| H | -0.438878000 | -2.102788000 | 2.433402000  |
| H | 0.452595000  | -1.828424000 | 0.911340000  |

|   |              |              |              |
|---|--------------|--------------|--------------|
| H | -0.767759000 | -3.134266000 | 1.007871000  |
| H | -0.113280000 | 3.547023000  | 3.983054000  |
| H | -0.245298000 | 4.021563000  | 2.229066000  |
| F | 0.180387000  | 2.766841000  | -1.765850000 |
| F | -1.796653000 | 3.978653000  | -1.752268000 |
| B | -0.389781000 | 4.052891000  | -1.519605000 |
| F | 0.188995000  | 5.005230000  | -2.386459000 |
| F | -0.158034000 | 4.427500000  | -0.165236000 |

82

"short"-[Cp\*Ru(dppm)(H2)]+ --- BF4- isomer b in CH<sub>2</sub>Cl<sub>2</sub>, E = -2557,648068

|    |              |              |              |
|----|--------------|--------------|--------------|
| Ru | -1.621369000 | 0.147614000  | 0.991835000  |
| C  | -1.622535000 | -1.605931000 | -0.392808000 |
| C  | -2.889176000 | -0.891863000 | -0.499938000 |
| C  | -3.549661000 | -0.946177000 | 0.780306000  |
| C  | -2.692442000 | -1.698204000 | 1.696122000  |
| C  | -1.514171000 | -2.111236000 | 0.959232000  |
| C  | -0.692877000 | -1.890714000 | -1.538786000 |
| C  | -3.422993000 | -0.271897000 | -1.760663000 |
| C  | -4.940862000 | -0.465391000 | 1.080041000  |
| C  | -3.096040000 | -2.132951000 | 3.077919000  |
| C  | -0.406836000 | -2.987935000 | 1.468691000  |
| C  | -0.308220000 | 2.407979000  | 2.676647000  |
| P  | -2.076609000 | 1.838383000  | 2.486418000  |
| C  | -3.087111000 | 3.291628000  | 1.981492000  |
| C  | -3.293658000 | 4.360768000  | 2.884168000  |
| C  | -4.036668000 | 5.483979000  | 2.481750000  |
| C  | -4.585334000 | 5.541064000  | 1.183853000  |
| C  | -4.387074000 | 4.474369000  | 0.287120000  |
| C  | -3.636385000 | 3.352144000  | 0.684313000  |
| C  | -2.722318000 | 1.483551000  | 4.169679000  |
| C  | -4.118209000 | 1.299497000  | 4.319302000  |
| C  | -4.657544000 | 0.936042000  | 5.564859000  |
| C  | -3.809785000 | 0.755441000  | 6.676170000  |
| C  | -2.423824000 | 0.955791000  | 6.537123000  |
| C  | -1.880604000 | 1.321893000  | 5.291327000  |
| P  | 0.352534000  | 0.795332000  | 1.986267000  |
| C  | 1.821295000  | 1.207009000  | 0.976189000  |
| C  | 2.647326000  | 2.308974000  | 1.286116000  |
| C  | 3.776088000  | 2.580255000  | 0.493466000  |
| C  | 4.084680000  | 1.753350000  | -0.603299000 |
| C  | 3.259090000  | 0.657161000  | -0.913992000 |
| C  | 2.125269000  | 0.387435000  | -0.130026000 |
| C  | 1.030997000  | -0.149364000 | 3.415452000  |
| C  | 0.126785000  | -0.887558000 | 4.209366000  |
| C  | 0.580032000  | -1.599978000 | 5.332322000  |
| C  | 1.949768000  | -1.594097000 | 5.660762000  |
| C  | 2.859258000  | -0.871820000 | 4.863273000  |
| C  | 2.405427000  | -0.149430000 | 3.743494000  |
| H  | -2.874718000 | 4.313083000  | 3.900815000  |
| H  | -4.190512000 | 6.317854000  | 3.183379000  |
| H  | -5.169931000 | 6.420210000  | 0.872950000  |
| H  | -4.815096000 | 4.514463000  | -0.725779000 |

|   |              |              |              |
|---|--------------|--------------|--------------|
| H | -3.469249000 | 2.516542000  | -0.011115000 |
| H | -4.786325000 | 1.455305000  | 3.460131000  |
| H | -5.744075000 | 0.795511000  | 5.668136000  |
| H | -4.231323000 | 0.467694000  | 7.651042000  |
| H | -1.755653000 | 0.829135000  | 7.402242000  |
| H | -0.797802000 | 1.475409000  | 5.204993000  |
| H | 2.409771000  | 2.958857000  | 2.141521000  |
| H | 4.414614000  | 3.444798000  | 0.730702000  |
| H | 4.965323000  | 1.973068000  | -1.225903000 |
| H | 3.488147000  | 0.019716000  | -1.781324000 |
| H | 1.455510000  | -0.444522000 | -0.385339000 |
| H | -0.934711000 | -0.894665000 | 3.934744000  |
| H | -0.137447000 | -2.164336000 | 5.946989000  |
| H | 2.310338000  | -2.157484000 | 6.534732000  |
| H | 3.931325000  | -0.870771000 | 5.112306000  |
| H | 3.121754000  | 0.409126000  | 3.124687000  |
| H | -1.663544000 | 1.504435000  | 0.063906000  |
| H | -0.842652000 | 0.993033000  | -0.187439000 |
| H | -1.119231000 | -2.683010000 | -2.190920000 |
| H | 0.290255000  | -2.249744000 | -1.182386000 |
| H | -0.527308000 | -0.990690000 | -2.159167000 |
| H | -3.867680000 | -1.052747000 | -2.413846000 |
| H | -4.210138000 | 0.473586000  | -1.542101000 |
| H | -2.618096000 | 0.230282000  | -2.329156000 |
| H | -5.687818000 | -1.205591000 | 0.720857000  |
| H | -5.096177000 | -0.339423000 | 2.165959000  |
| H | -5.159829000 | 0.499262000  | 0.585268000  |
| H | -3.924430000 | -2.870735000 | 3.018479000  |
| H | -2.261471000 | -2.619494000 | 3.613877000  |
| H | -3.453543000 | -1.283688000 | 3.690706000  |
| H | -0.295274000 | -2.914292000 | 2.564587000  |
| H | 0.564524000  | -2.720525000 | 1.012257000  |
| H | -0.617646000 | -4.049318000 | 1.218090000  |
| H | 0.047531000  | 2.761808000  | 3.661963000  |
| H | -0.141799000 | 3.177823000  | 1.897834000  |
| B | 0.101088000  | 3.095286000  | -1.768766000 |
| F | -0.160681000 | 1.713668000  | -2.054542000 |
| F | 1.474405000  | 3.361989000  | -1.947799000 |
| F | -0.273948000 | 3.383401000  | -0.419669000 |
| F | -0.676936000 | 3.894630000  | -2.642975000 |

82

"short"-[Cp\*Ru(dppm)(H<sub>2</sub>)]+ --- BF<sub>4</sub>- isomer c in CH<sub>2</sub>Cl<sub>2</sub>, E = -2557,647602

|    |              |              |              |
|----|--------------|--------------|--------------|
| Ru | -1.519351000 | 0.224058000  | 1.053032000  |
| C  | -1.563677000 | -1.480030000 | -0.398700000 |
| C  | -2.818398000 | -0.738740000 | -0.476863000 |
| C  | -3.472979000 | -0.824464000 | 0.804137000  |
| C  | -2.627654000 | -1.621431000 | 1.690080000  |
| C  | -1.463268000 | -2.038057000 | 0.930218000  |
| C  | -0.621781000 | -1.742047000 | -1.539649000 |
| C  | -3.374284000 | -0.088505000 | -1.711904000 |
| C  | -4.858822000 | -0.348548000 | 1.130137000  |
| C  | -3.053049000 | -2.108907000 | 3.047988000  |

|   |              |              |              |
|---|--------------|--------------|--------------|
| C | -0.389929000 | -2.982553000 | 1.386092000  |
| C | -0.202776000 | 2.298063000  | 2.988390000  |
| P | -1.973947000 | 1.856539000  | 2.618005000  |
| C | -2.838865000 | 3.399717000  | 2.134895000  |
| C | -2.764218000 | 4.535284000  | 2.970659000  |
| C | -3.406613000 | 5.724388000  | 2.589564000  |
| C | -4.134754000 | 5.779928000  | 1.384792000  |
| C | -4.214737000 | 4.646453000  | 0.555623000  |
| C | -3.561067000 | 3.458088000  | 0.927222000  |
| C | -2.787063000 | 1.417556000  | 4.205361000  |
| C | -4.201442000 | 1.433569000  | 4.263415000  |
| C | -4.868343000 | 0.994697000  | 5.420299000  |
| C | -4.131595000 | 0.542367000  | 6.533124000  |
| C | -2.724640000 | 0.549547000  | 6.489174000  |
| C | -2.053386000 | 0.988064000  | 5.332768000  |
| P | 0.436746000  | 0.752463000  | 2.164247000  |
| C | 1.920150000  | 1.167337000  | 1.170539000  |
| C | 2.403183000  | 2.485291000  | 1.040827000  |
| C | 3.485054000  | 2.751577000  | 0.179890000  |
| C | 4.094669000  | 1.708102000  | -0.540160000 |
| C | 3.618185000  | 0.387217000  | -0.404279000 |
| C | 2.529269000  | 0.117957000  | 0.440929000  |
| C | 1.095601000  | -0.300678000 | 3.521350000  |
| C | 0.192397000  | -1.103662000 | 4.248682000  |
| C | 0.639281000  | -1.873419000 | 5.336436000  |
| C | 2.000645000  | -1.852779000 | 5.696876000  |
| C | 2.908055000  | -1.055880000 | 4.970687000  |
| C | 2.460736000  | -0.278145000 | 3.886437000  |
| H | -2.193969000 | 4.493504000  | 3.910994000  |
| H | -3.334295000 | 6.614956000  | 3.232204000  |
| H | -4.633999000 | 6.714873000  | 1.088036000  |
| H | -4.777311000 | 4.689441000  | -0.389261000 |
| H | -3.589977000 | 2.572945000  | 0.274871000  |
| H | -4.780781000 | 1.802672000  | 3.404879000  |
| H | -5.968219000 | 1.009586000  | 5.453615000  |
| H | -4.654326000 | 0.196053000  | 7.437376000  |
| H | -2.140916000 | 0.215120000  | 7.360131000  |
| H | -0.956324000 | 0.993905000  | 5.319836000  |
| H | 1.934847000  | 3.314884000  | 1.583664000  |
| H | 3.836757000  | 3.787483000  | 0.066328000  |
| H | 4.938839000  | 1.921538000  | -1.213373000 |
| H | 4.090591000  | -0.433046000 | -0.965680000 |
| H | 2.149324000  | -0.910503000 | 0.535838000  |
| H | -0.863223000 | -1.112251000 | 3.954028000  |
| H | -0.076038000 | -2.492717000 | 5.898438000  |
| H | 2.356469000  | -2.459855000 | 6.543034000  |
| H | 3.972406000  | -1.038094000 | 5.250132000  |
| H | 3.172621000  | 0.343794000  | 3.324952000  |
| H | -1.535585000 | 1.612149000  | 0.166372000  |
| H | -0.674118000 | 1.099988000  | -0.050997000 |
| H | -0.905310000 | -2.677117000 | -2.069212000 |
| H | 0.419686000  | -1.859029000 | -1.186842000 |

|   |              |              |              |
|---|--------------|--------------|--------------|
| H | -0.640062000 | -0.917919000 | -2.276924000 |
| H | -3.920848000 | -0.838229000 | -2.323037000 |
| H | -4.084866000 | 0.720560000  | -1.459732000 |
| H | -2.573574000 | 0.339760000  | -2.343553000 |
| H | -5.603830000 | -1.113332000 | 0.821477000  |
| H | -4.982278000 | -0.185073000 | 2.215039000  |
| H | -5.108947000 | 0.592367000  | 0.606366000  |
| H | -3.927360000 | -2.786650000 | 2.948618000  |
| H | -2.251530000 | -2.680549000 | 3.548847000  |
| H | -3.354997000 | -1.276145000 | 3.710905000  |
| H | -0.253140000 | -2.962174000 | 2.480925000  |
| H | 0.583452000  | -2.749691000 | 0.916004000  |
| H | -0.660038000 | -4.020506000 | 1.096337000  |
| H | 0.095452000  | 2.479371000  | 4.037501000  |
| H | 0.024445000  | 3.187122000  | 2.367587000  |
| B | 0.061668000  | 5.060379000  | 0.367699000  |
| F | -0.369048000 | 3.735673000  | 0.056310000  |
| F | 1.213040000  | 5.368429000  | -0.401156000 |
| F | 0.407563000  | 5.122158000  | 1.759176000  |
| F | -0.973818000 | 5.977754000  | 0.097562000  |

82

"short"-[Cp\*Ru(dppm)(H2)]+ --- BF4- isomer d in CH<sub>2</sub>Cl<sub>2</sub>, E = -2557,649315

|    |              |              |              |
|----|--------------|--------------|--------------|
| Ru | -1.731313000 | 1.044483000  | 1.013242000  |
| C  | -1.619734000 | -0.860440000 | -0.172816000 |
| C  | -2.944289000 | -0.273140000 | -0.318689000 |
| C  | -3.569984000 | -0.231526000 | 0.980615000  |
| C  | -2.624550000 | -0.784337000 | 1.949501000  |
| C  | -1.442293000 | -1.200027000 | 1.220887000  |
| C  | -0.678659000 | -1.210024000 | -1.290265000 |
| C  | -3.593957000 | 0.112132000  | -1.616999000 |
| C  | -5.009616000 | 0.104250000  | 1.243251000  |
| C  | -2.921712000 | -1.058391000 | 3.395937000  |
| C  | -0.278632000 | -1.960517000 | 1.781158000  |
| C  | -0.471867000 | 3.206755000  | 2.924595000  |
| P  | -2.222417000 | 2.782933000  | 2.465864000  |
| C  | -2.992628000 | 4.330937000  | 1.837460000  |
| C  | -2.801887000 | 5.536941000  | 2.552068000  |
| C  | -3.418135000 | 6.716687000  | 2.099383000  |
| C  | -4.234987000 | 6.695371000  | 0.949823000  |
| C  | -4.432545000 | 5.492118000  | 0.246419000  |
| C  | -3.807672000 | 4.309434000  | 0.687210000  |
| C  | -3.173691000 | 2.534350000  | 4.022354000  |
| C  | -4.573444000 | 2.364917000  | 3.899629000  |
| C  | -5.360609000 | 2.112189000  | 5.035172000  |
| C  | -4.758157000 | 2.034921000  | 6.307156000  |
| C  | -3.372407000 | 2.240450000  | 6.436133000  |
| C  | -2.577365000 | 2.495538000  | 5.301392000  |
| P  | 0.223067000  | 1.742817000  | 2.013879000  |
| C  | 1.652239000  | 2.340589000  | 1.036703000  |
| C  | 2.552016000  | 3.268737000  | 1.611612000  |
| C  | 3.669434000  | 3.698864000  | 0.874451000  |
| C  | 3.898105000  | 3.199562000  | -0.424196000 |



|   |              |              |              |
|---|--------------|--------------|--------------|
| C | 3.004617000  | 2.271521000  | -0.992604000 |
| C | 1.878317000  | 1.844133000  | -0.264194000 |
| C | 1.001632000  | 0.672019000  | 3.286208000  |
| C | 0.284487000  | 0.376798000  | 4.467093000  |
| C | 0.819242000  | -0.508954000 | 5.416346000  |
| C | 2.070068000  | -1.117526000 | 5.188835000  |
| C | 2.785836000  | -0.828151000 | 4.012081000  |
| C | 2.256887000  | 0.065658000  | 3.061879000  |
| H | -2.171251000 | 5.551872000  | 3.454414000  |
| H | -3.261308000 | 7.658162000  | 2.647459000  |
| H | -4.717186000 | 7.621457000  | 0.601695000  |
| H | -5.070646000 | 5.472663000  | -0.649982000 |
| H | -3.947581000 | 3.365542000  | 0.137965000  |
| H | -5.050805000 | 2.447628000  | 2.913313000  |
| H | -6.447730000 | 1.979789000  | 4.926900000  |
| H | -5.372579000 | 1.833110000  | 7.197514000  |
| H | -2.899094000 | 2.214355000  | 7.429389000  |
| H | -1.509622000 | 2.705818000  | 5.439067000  |
| H | 2.376433000  | 3.658100000  | 2.626331000  |
| H | 4.365589000  | 4.427919000  | 1.316015000  |
| H | 4.775286000  | 3.538851000  | -0.995804000 |
| H | 3.181071000  | 1.881931000  | -2.006491000 |
| H | 1.168480000  | 1.126650000  | -0.702290000 |
| H | -0.698715000 | 0.829545000  | 4.644282000  |
| H | 0.255078000  | -0.726580000 | 6.335644000  |
| H | 2.486499000  | -1.815525000 | 5.930643000  |
| H | 3.763568000  | -1.299167000 | 3.829789000  |
| H | 2.821334000  | 0.287293000  | 2.145018000  |
| H | -2.005972000 | 2.269126000  | -0.034941000 |
| H | -1.010748000 | 1.862819000  | -0.206103000 |
| H | -0.921710000 | -2.214388000 | -1.699299000 |
| H | 0.370291000  | -1.238885000 | -0.940868000 |
| H | -0.745116000 | -0.483878000 | -2.121812000 |
| H | -4.106422000 | -0.769088000 | -2.059041000 |
| H | -4.352271000 | 0.903911000  | -1.471429000 |
| H | -2.851484000 | 0.472253000  | -2.353540000 |
| H | -5.655408000 | -0.739187000 | 0.917035000  |
| H | -5.196173000 | 0.267947000  | 2.318233000  |
| H | -5.335086000 | 1.004920000  | 0.689411000  |
| H | -3.528608000 | -1.983758000 | 3.495304000  |
| H | -1.993692000 | -1.200811000 | 3.977833000  |
| H | -3.490810000 | -0.231029000 | 3.858320000  |
| H | -0.159328000 | -1.795760000 | 2.865511000  |
| H | 0.670449000  | -1.683684000 | 1.287053000  |
| H | -0.440825000 | -3.046990000 | 1.615811000  |
| H | -0.223928000 | 3.224881000  | 3.997385000  |
| H | -0.155820000 | 4.163494000  | 2.471054000  |
| F | 1.630757000  | 4.976135000  | 4.632004000  |
| F | 0.568231000  | 3.387922000  | 5.952932000  |
| B | 0.697483000  | 4.793663000  | 5.689590000  |
| F | -0.572653000 | 5.304526000  | 5.299643000  |
| F | 1.144148000  | 5.449189000  | 6.854538000  |

"long"-[Cp\*Ru(dppm)(H<sub>2</sub>)]+ --- BF<sub>4</sub>- isomer e in CH<sub>2</sub>Cl<sub>2</sub>, E = -2557,647945

|    |              |              |              |
|----|--------------|--------------|--------------|
| Ru | -1.060386000 | 1.460423000  | 2.027937000  |
| C  | -1.231780000 | -0.593838000 | 1.109011000  |
| C  | -2.551297000 | -0.014141000 | 1.285140000  |
| C  | -2.765735000 | 0.194367000  | 2.702281000  |
| C  | -1.578681000 | -0.279127000 | 3.407932000  |
| C  | -0.643968000 | -0.769336000 | 2.420643000  |
| C  | -0.654258000 | -1.094573000 | -0.183642000 |
| C  | -3.565556000 | 0.205054000  | 0.198901000  |
| C  | -4.063140000 | 0.593251000  | 3.345177000  |
| C  | -1.466740000 | -0.411860000 | 4.900223000  |
| C  | 0.666724000  | -1.449364000 | 2.684723000  |
| C  | 0.601870000  | 3.956050000  | 2.949002000  |
| P  | -1.115506000 | 3.363013000  | 3.342159000  |
| C  | -2.275202000 | 4.737727000  | 2.953388000  |
| C  | -2.009649000 | 6.023296000  | 3.479842000  |
| C  | -2.893789000 | 7.083443000  | 3.216797000  |
| C  | -4.053176000 | 6.862357000  | 2.444807000  |
| C  | -4.324247000 | 5.580575000  | 1.930632000  |
| C  | -3.433198000 | 4.518879000  | 2.180355000  |
| C  | -1.273972000 | 3.291949000  | 5.174449000  |
| C  | -2.566681000 | 3.076238000  | 5.709833000  |
| C  | -2.748840000 | 2.956389000  | 7.097649000  |
| C  | -1.642479000 | 3.057785000  | 7.964961000  |
| C  | -0.360623000 | 3.298424000  | 7.437051000  |
| C  | -0.170542000 | 3.420014000  | 6.046753000  |
| P  | 1.083054000  | 2.311097000  | 2.209154000  |
| C  | 2.111200000  | 2.653919000  | 0.734063000  |
| C  | 3.069667000  | 3.693709000  | 0.766198000  |
| C  | 3.875621000  | 3.925009000  | -0.363588000 |
| C  | 3.737232000  | 3.123844000  | -1.514538000 |
| C  | 2.784915000  | 2.086462000  | -1.541807000 |
| C  | 1.968964000  | 1.853400000  | -0.419650000 |
| C  | 2.232406000  | 1.503678000  | 3.391355000  |
| C  | 1.727232000  | 1.134127000  | 4.656339000  |
| C  | 2.560631000  | 0.522129000  | 5.604012000  |
| C  | 3.904946000  | 0.246835000  | 5.282070000  |
| C  | 4.405107000  | 0.591546000  | 4.013309000  |
| C  | 3.575329000  | 1.222556000  | 3.068109000  |
| H  | -1.112372000 | 6.194917000  | 4.094349000  |
| H  | -2.679347000 | 8.085594000  | 3.617685000  |
| H  | -4.746195000 | 7.693487000  | 2.244558000  |
| H  | -5.229564000 | 5.404385000  | 1.330436000  |
| H  | -3.632487000 | 3.516776000  | 1.772055000  |
| H  | -3.436450000 | 3.018311000  | 5.039714000  |
| H  | -3.757891000 | 2.786710000  | 7.502483000  |
| H  | -1.783048000 | 2.961185000  | 9.052098000  |
| H  | 0.505373000  | 3.399062000  | 8.108669000  |
| H  | 0.837633000  | 3.620944000  | 5.662935000  |
| H  | 3.195542000  | 4.309683000  | 1.667758000  |
| H  | 4.619618000  | 4.735743000  | -0.341538000 |

|   |              |              |              |
|---|--------------|--------------|--------------|
| H | 4.372563000  | 3.310016000  | -2.393820000 |
| H | 2.672263000  | 1.460169000  | -2.439567000 |
| H | 1.213712000  | 1.055024000  | -0.438457000 |
| H | 0.672069000  | 1.314070000  | 4.891339000  |
| H | 2.156939000  | 0.250513000  | 6.591156000  |
| H | 4.560300000  | -0.240308000 | 6.020015000  |
| H | 5.453444000  | 0.377551000  | 3.756044000  |
| H | 3.981116000  | 1.504498000  | 2.088029000  |
| H | -1.875295000 | 2.540011000  | 1.186747000  |
| H | -0.665672000 | 2.004308000  | 0.579994000  |
| H | -1.007283000 | -2.129514000 | -0.381201000 |
| H | 0.450420000  | -1.124581000 | -0.150215000 |
| H | -0.960045000 | -0.465761000 | -1.040133000 |
| H | -4.153488000 | -0.723809000 | 0.038118000  |
| H | -4.275102000 | 1.011080000  | 0.463028000  |
| H | -3.083054000 | 0.468337000  | -0.760795000 |
| H | -4.738623000 | -0.286676000 | 3.411186000  |
| H | -3.906103000 | 0.966963000  | 4.371880000  |
| H | -4.590084000 | 1.374572000  | 2.766756000  |
| H | -2.153477000 | -1.207994000 | 5.258338000  |
| H | -0.444141000 | -0.689537000 | 5.209737000  |
| H | -1.746399000 | 0.522822000  | 5.421338000  |
| H | 1.072467000  | -1.194383000 | 3.678381000  |
| H | 1.427853000  | -1.176489000 | 1.930151000  |
| H | 0.528019000  | -2.550451000 | 2.640079000  |
| H | 1.251784000  | 4.343225000  | 3.752273000  |
| H | 0.535587000  | 4.704540000  | 2.135721000  |
| F | 3.132112000  | 5.728166000  | 3.450916000  |
| F | 4.624532000  | 5.818747000  | 5.224665000  |
| B | 3.864370000  | 4.952652000  | 4.402848000  |
| F | 4.713555000  | 4.053129000  | 3.720507000  |
| F | 2.936559000  | 4.226314000  | 5.213857000  |

82

"long"-[Cp\*Ru(dppm)(H<sub>2</sub>)]+ --- BF<sub>4</sub>- isomer f in CH<sub>2</sub>Cl<sub>2</sub>, E = -2557,649533

|    |              |              |              |
|----|--------------|--------------|--------------|
| Ru | -1.746609000 | 1.063660000  | 0.993414000  |
| C  | -1.591687000 | -0.878440000 | -0.147224000 |
| C  | -2.901968000 | -0.285519000 | -0.344291000 |
| C  | -3.568414000 | -0.223514000 | 0.941540000  |
| C  | -2.664250000 | -0.787870000 | 1.939190000  |
| C  | -1.462566000 | -1.209360000 | 1.255814000  |
| C  | -0.611869000 | -1.242716000 | -1.225649000 |
| C  | -3.517207000 | 0.070479000  | -1.667554000 |
| C  | -5.015612000 | 0.120550000  | 1.150436000  |
| C  | -2.999880000 | -1.044914000 | 3.379944000  |
| C  | -0.322666000 | -1.975080000 | 1.855012000  |
| C  | -0.467626000 | 3.226877000  | 2.896999000  |
| P  | -2.218440000 | 2.797591000  | 2.457302000  |
| C  | -3.009190000 | 4.347752000  | 1.860130000  |
| C  | -2.797263000 | 5.542127000  | 2.588526000  |
| C  | -3.431074000 | 6.727796000  | 2.177264000  |
| C  | -4.286582000 | 6.724088000  | 1.056261000  |
| C  | -4.505510000 | 5.532152000  | 0.340165000  |

|   |              |              |              |
|---|--------------|--------------|--------------|
| C | -3.863569000 | 4.343908000  | 0.739049000  |
| C | -3.152838000 | 2.529329000  | 4.021296000  |
| C | -4.548853000 | 2.327854000  | 3.904571000  |
| C | -5.326795000 | 2.067586000  | 5.044604000  |
| C | -4.718350000 | 2.013888000  | 6.314968000  |
| C | -3.336787000 | 2.249141000  | 6.437286000  |
| C | -2.550717000 | 2.512747000  | 5.298034000  |
| P | 0.218678000  | 1.766304000  | 1.980025000  |
| C | 1.655562000  | 2.350460000  | 1.008368000  |
| C | 2.557921000  | 3.269204000  | 1.594429000  |
| C | 3.690296000  | 3.684792000  | 0.871699000  |
| C | 3.931247000  | 3.180501000  | -0.422621000 |
| C | 3.034723000  | 2.262058000  | -1.001586000 |
| C | 1.893643000  | 1.849039000  | -0.288269000 |
| C | 0.985687000  | 0.686615000  | 3.252747000  |
| C | 0.264070000  | 0.397874000  | 4.432490000  |
| C | 0.792968000  | -0.486017000 | 5.386554000  |
| C | 2.041632000  | -1.100839000 | 5.164089000  |
| C | 2.760616000  | -0.819898000 | 3.987356000  |
| C | 2.238117000  | 0.073100000  | 3.032713000  |
| H | -2.137716000 | 5.545303000  | 3.470076000  |
| H | -3.257127000 | 7.659806000  | 2.736145000  |
| H | -4.782344000 | 7.654518000  | 0.740338000  |
| H | -5.173790000 | 5.525521000  | -0.534101000 |
| H | -4.022153000 | 3.410774000  | 0.177102000  |
| H | -5.030835000 | 2.390218000  | 2.918965000  |
| H | -6.410987000 | 1.910124000  | 4.941047000  |
| H | -5.325143000 | 1.806070000  | 7.209143000  |
| H | -2.859666000 | 2.239716000  | 7.429001000  |
| H | -1.486401000 | 2.743153000  | 5.431421000  |
| H | 2.375250000  | 3.663885000  | 2.605856000  |
| H | 4.388457000  | 4.406687000  | 1.321698000  |
| H | 4.820205000  | 3.508242000  | -0.982610000 |
| H | 3.220133000  | 1.868422000  | -2.012254000 |
| H | 1.182780000  | 1.139310000  | -0.736602000 |
| H | -0.718071000 | 0.854344000  | 4.605678000  |
| H | 0.225650000  | -0.697506000 | 6.305308000  |
| H | 2.453588000  | -1.797591000 | 5.909539000  |
| H | 3.736290000  | -1.296429000 | 3.808533000  |
| H | 2.806210000  | 0.289092000  | 2.116781000  |
| H | -2.278682000 | 2.246396000  | 0.070132000  |
| H | -0.915217000 | 1.753958000  | -0.182816000 |
| H | -0.827557000 | -2.262591000 | -1.610334000 |
| H | 0.426524000  | -1.244750000 | -0.845075000 |
| H | -0.666035000 | -0.541755000 | -2.079032000 |
| H | -4.018573000 | -0.820702000 | -2.102118000 |
| H | -4.277612000 | 0.866001000  | -1.559670000 |
| H | -2.755143000 | 0.414517000  | -2.391424000 |
| H | -5.654590000 | -0.710504000 | 0.782330000  |
| H | -5.245528000 | 0.266857000  | 2.219589000  |
| H | -5.309984000 | 1.034083000  | 0.600415000  |
| H | -3.585363000 | -1.984354000 | 3.475199000  |

|   |              |              |             |
|---|--------------|--------------|-------------|
| H | -2.087263000 | -1.154229000 | 3.992796000 |
| H | -3.604836000 | -0.226478000 | 3.810558000 |
| H | -0.230985000 | -1.802532000 | 2.940782000 |
| H | 0.642190000  | -1.713495000 | 1.384260000 |
| H | -0.491678000 | -3.061255000 | 1.693925000 |
| H | -0.204770000 | 3.248482000  | 3.966244000 |
| H | -0.160411000 | 4.181266000  | 2.432634000 |
| F | 1.650104000  | 4.998067000  | 4.563285000 |
| F | 0.604929000  | 3.414057000  | 5.902795000 |
| B | 0.735824000  | 4.819387000  | 5.637936000 |
| F | -0.539280000 | 5.334911000  | 5.271019000 |
| F | 1.206297000  | 5.472518000  | 6.794491000 |

97

"short"-[Cp\*Ru(dppm)(H<sub>2</sub>)]+ --- BF<sub>4</sub>-\*3CH<sub>2</sub>Cl<sub>2</sub> in CH<sub>2</sub>Cl<sub>2</sub>, E = -5435,336546

|    |              |              |              |
|----|--------------|--------------|--------------|
| Ru | -1.692504000 | 1.098253000  | 0.978372000  |
| C  | -1.609668000 | -0.614939000 | -0.457571000 |
| C  | -2.880152000 | 0.083303000  | -0.605020000 |
| C  | -3.595684000 | -0.009560000 | 0.642666000  |
| C  | -2.775049000 | -0.780032000 | 1.575450000  |
| C  | -1.557264000 | -1.155360000 | 0.884183000  |
| C  | -0.625077000 | -0.865716000 | -1.564286000 |
| C  | -3.386972000 | 0.703863000  | -1.874372000 |
| C  | -5.005299000 | 0.451404000  | 0.881051000  |
| C  | -3.243879000 | -1.278933000 | 2.913807000  |
| C  | -0.462497000 | -2.029848000 | 1.423267000  |
| C  | -0.468190000 | 3.306034000  | 2.782366000  |
| P  | -2.228086000 | 2.730537000  | 2.525914000  |
| C  | -3.285799000 | 4.169418000  | 2.082889000  |
| C  | -3.602468000 | 5.145979000  | 3.056595000  |
| C  | -4.381578000 | 6.259870000  | 2.703723000  |
| C  | -4.856255000 | 6.401239000  | 1.383785000  |
| C  | -4.550502000 | 5.425395000  | 0.417532000  |
| C  | -3.767643000 | 4.308733000  | 0.765662000  |
| C  | -2.889349000 | 2.303729000  | 4.189396000  |
| C  | -4.269750000 | 2.005756000  | 4.289756000  |
| C  | -4.827317000 | 1.618828000  | 5.519852000  |
| C  | -4.013025000 | 1.529433000  | 6.666753000  |
| C  | -2.644411000 | 1.843039000  | 6.577073000  |
| C  | -2.083680000 | 2.232080000  | 5.345957000  |
| P  | 0.219708000  | 1.696631000  | 2.112955000  |
| C  | 1.776680000  | 2.102209000  | 1.239467000  |
| C  | 2.680455000  | 3.055631000  | 1.760726000  |
| C  | 3.896881000  | 3.300479000  | 1.099288000  |
| C  | 4.210741000  | 2.603461000  | -0.083550000 |
| C  | 3.302707000  | 1.666862000  | -0.613289000 |
| C  | 2.085765000  | 1.417808000  | 0.045203000  |
| C  | 0.771299000  | 0.688482000  | 3.556165000  |
| C  | -0.218071000 | -0.012506000 | 4.279636000  |
| C  | 0.127348000  | -0.788703000 | 5.397990000  |
| C  | 1.475352000  | -0.889066000 | 5.793480000  |
| C  | 2.470280000  | -0.208973000 | 5.064700000  |
| C  | 2.124008000  | 0.578425000  | 3.950105000  |

|    |              |              |              |
|----|--------------|--------------|--------------|
| H  | -3.229314000 | 5.041014000  | 4.085290000  |
| H  | -4.603810000 | 7.031084000  | 3.455908000  |
| H  | -5.455504000 | 7.281576000  | 1.108112000  |
| H  | -4.909995000 | 5.534604000  | -0.616537000 |
| H  | -3.505788000 | 3.560692000  | 0.006582000  |
| H  | -4.914057000 | 2.094741000  | 3.403513000  |
| H  | -5.901517000 | 1.388683000  | 5.583153000  |
| H  | -4.447935000 | 1.223862000  | 7.630268000  |
| H  | -2.003022000 | 1.786515000  | 7.469374000  |
| H  | -1.013777000 | 2.469642000  | 5.298821000  |
| H  | 2.432804000  | 3.615295000  | 2.674333000  |
| H  | 4.588144000  | 4.059776000  | 1.492387000  |
| H  | 5.156019000  | 2.809831000  | -0.605909000 |
| H  | 3.536265000  | 1.138263000  | -1.549599000 |
| H  | 1.358527000  | 0.708223000  | -0.371131000 |
| H  | -1.261296000 | 0.055458000  | 3.952374000  |
| H  | -0.658145000 | -1.320227000 | 5.956022000  |
| H  | 1.751893000  | -1.503454000 | 6.663653000  |
| H  | 3.526553000  | -0.291798000 | 5.362494000  |
| H  | 2.911186000  | 1.097650000  | 3.386970000  |
| H  | -1.759350000 | 2.463477000  | 0.070220000  |
| H  | -0.862718000 | 2.013554000  | -0.104007000 |
| H  | -0.987428000 | -1.687500000 | -2.218871000 |
| H  | 0.361006000  | -1.170627000 | -1.167987000 |
| H  | -0.487357000 | 0.028000000  | -2.199562000 |
| H  | -3.870641000 | -0.072794000 | -2.504891000 |
| H  | -4.135645000 | 1.490388000  | -1.668793000 |
| H  | -2.567991000 | 1.154194000  | -2.460924000 |
| H  | -5.724589000 | -0.263434000 | 0.426936000  |
| H  | -5.232754000 | 0.509609000  | 1.959873000  |
| H  | -5.192415000 | 1.445582000  | 0.433738000  |
| H  | -4.061154000 | -2.018431000 | 2.775789000  |
| H  | -2.433622000 | -1.783964000 | 3.469051000  |
| H  | -3.641973000 | -0.462715000 | 3.545906000  |
| H  | -0.395462000 | -1.971205000 | 2.523815000  |
| H  | 0.523030000  | -1.746781000 | 1.008386000  |
| H  | -0.653965000 | -3.088933000 | 1.148635000  |
| H  | -0.149680000 | 3.668008000  | 3.776860000  |
| H  | -0.270821000 | 4.081523000  | 2.016622000  |
| F  | 0.076316000  | 3.241633000  | -1.868727000 |
| F  | -2.163325000 | 3.861560000  | -1.968461000 |
| B  | -0.843684000 | 4.309315000  | -1.661711000 |
| F  | -0.511357000 | 5.400225000  | -2.505945000 |
| F  | -0.780531000 | 4.719573000  | -0.299755000 |
| H  | 2.019405000  | 4.463598000  | -0.583218000 |
| H  | -1.953380000 | 6.426724000  | 1.103400000  |
| H  | 0.093646000  | 3.325017000  | -4.457047000 |
| C  | -0.893132000 | 2.991573000  | -4.813127000 |
| H  | -1.689987000 | 3.275446000  | -4.108404000 |
| Cl | -0.863381000 | 1.192417000  | -4.920209000 |
| Cl | -1.224836000 | 3.766432000  | -6.399172000 |
| C  | -1.274635000 | 7.251605000  | 1.368477000  |

|    |              |             |              |
|----|--------------|-------------|--------------|
| H  | -0.408901000 | 7.299686000 | 0.689168000  |
| Cl | -0.642136000 | 6.942839000 | 3.024331000  |
| Cl | -2.178725000 | 8.798476000 | 1.258527000  |
| C  | 2.192750000  | 5.525089000 | -0.816628000 |
| H  | 1.382316000  | 5.940850000 | -1.433901000 |
| Cl | 2.246949000  | 6.434241000 | 0.735052000  |
| Cl | 3.727635000  | 5.658785000 | -1.741674000 |

97

"long"-[Cp\*Ru(dppm)(H<sub>2</sub>)]+ --- BF<sub>4</sub><sup>-</sup>\*3CH<sub>2</sub>Cl<sub>2</sub> in CH<sub>2</sub>Cl<sub>2</sub>, E = -5435,34211

|    |              |              |              |
|----|--------------|--------------|--------------|
| Ru | -1.688241000 | -0.019728000 | 0.589598000  |
| C  | -1.759342000 | -2.065319000 | -0.349310000 |
| C  | -2.961078000 | -1.316238000 | -0.675978000 |
| C  | -3.665604000 | -1.039215000 | 0.559032000  |
| C  | -2.908739000 | -1.652004000 | 1.648817000  |
| C  | -1.749035000 | -2.291347000 | 1.080552000  |
| C  | -0.812358000 | -2.685682000 | -1.335845000 |
| C  | -3.437155000 | -1.006804000 | -2.065645000 |
| C  | -5.040466000 | -0.447475000 | 0.683474000  |
| C  | -3.384019000 | -1.742028000 | 3.070362000  |
| C  | -0.746437000 | -3.157097000 | 1.786858000  |
| C  | -0.134913000 | 2.312400000  | 2.015266000  |
| P  | -1.938311000 | 1.874523000  | 1.899668000  |
| C  | -2.839467000 | 3.349902000  | 1.290777000  |
| C  | -2.550162000 | 4.615697000  | 1.845147000  |
| C  | -3.267400000 | 5.743493000  | 1.415689000  |
| C  | -4.283445000 | 5.610074000  | 0.449041000  |
| C  | -4.577072000 | 4.347296000  | -0.095989000 |
| C  | -3.848973000 | 3.217059000  | 0.319054000  |
| C  | -2.593114000 | 1.748791000  | 3.615635000  |
| C  | -3.998264000 | 1.768064000  | 3.790181000  |
| C  | -4.558264000 | 1.594446000  | 5.067374000  |
| C  | -3.722109000 | 1.403711000  | 6.185340000  |
| C  | -2.324443000 | 1.404509000  | 6.020091000  |
| C  | -1.760167000 | 1.579718000  | 4.742662000  |
| P  | 0.375319000  | 0.635130000  | 1.384201000  |
| C  | 1.807033000  | 0.844379000  | 0.267044000  |
| C  | 2.595574000  | 2.014454000  | 0.274706000  |
| C  | 3.713357000  | 2.107265000  | -0.575608000 |
| C  | 4.044306000  | 1.038388000  | -1.429435000 |
| C  | 3.254095000  | -0.127771000 | -1.440485000 |
| C  | 2.135204000  | -0.224212000 | -0.596635000 |
| C  | 1.094916000  | -0.232291000 | 2.842734000  |
| C  | 0.211889000  | -0.782863000 | 3.795821000  |
| C  | 0.709310000  | -1.396790000 | 4.957196000  |
| C  | 2.099834000  | -1.482552000 | 5.164940000  |
| C  | 2.986480000  | -0.948886000 | 4.209201000  |
| C  | 2.489754000  | -0.321937000 | 3.050862000  |
| H  | -1.756327000 | 4.723362000  | 2.598826000  |
| H  | -3.027855000 | 6.733601000  | 1.832110000  |
| H  | -4.842732000 | 6.496818000  | 0.114045000  |
| H  | -5.357029000 | 4.239654000  | -0.863354000 |
| H  | -4.049567000 | 2.230910000  | -0.121679000 |

|    |              |              |              |
|----|--------------|--------------|--------------|
| H  | -4.656631000 | 1.933968000  | 2.924934000  |
| H  | -5.651757000 | 1.610057000  | 5.189173000  |
| H  | -4.160097000 | 1.265145000  | 7.185225000  |
| H  | -1.663307000 | 1.272259000  | 6.889823000  |
| H  | -0.668011000 | 1.584740000  | 4.637817000  |
| H  | 2.340735000  | 2.861170000  | 0.925958000  |
| H  | 4.316531000  | 3.025683000  | -0.580314000 |
| H  | 4.908664000  | 1.122926000  | -2.104048000 |
| H  | 3.494953000  | -0.953586000 | -2.125864000 |
| H  | 1.500916000  | -1.120846000 | -0.618144000 |
| H  | -0.868556000 | -0.728903000 | 3.613813000  |
| H  | 0.009520000  | -1.816014000 | 5.695858000  |
| H  | 2.493444000  | -1.970603000 | 6.069364000  |
| H  | 4.073682000  | -1.019106000 | 4.364917000  |
| H  | 3.187425000  | 0.095868000  | 2.311303000  |
| H  | -2.002490000 | 1.194555000  | -0.388116000 |
| H  | -0.851606000 | 0.437538000  | -0.682863000 |
| H  | -1.243111000 | -3.629286000 | -1.734393000 |
| H  | 0.154897000  | -2.937996000 | -0.863695000 |
| H  | -0.613499000 | -2.016767000 | -2.191980000 |
| H  | -4.018794000 | -1.864392000 | -2.465964000 |
| H  | -4.088692000 | -0.115622000 | -2.089009000 |
| H  | -2.589513000 | -0.827803000 | -2.752229000 |
| H  | -5.803945000 | -1.255171000 | 0.684313000  |
| H  | -5.158322000 | 0.118332000  | 1.625117000  |
| H  | -5.272567000 | 0.227724000  | -0.160400000 |
| H  | -4.246844000 | -2.438557000 | 3.135467000  |
| H  | -2.597382000 | -2.124151000 | 3.745756000  |
| H  | -3.721426000 | -0.762657000 | 3.455581000  |
| H  | -0.866669000 | -3.124836000 | 2.882671000  |
| H  | 0.293003000  | -2.860674000 | 1.551282000  |
| H  | -0.875578000 | -4.210488000 | 1.460603000  |
| H  | 0.272067000  | 2.638265000  | 2.989539000  |
| H  | 0.059393000  | 3.078873000  | 1.239895000  |
| B  | -0.203240000 | 4.583984000  | -1.022989000 |
| F  | -0.497261000 | 3.191602000  | -0.994802000 |
| F  | 0.792139000  | 4.829603000  | -2.014724000 |
| F  | 0.306626000  | 4.977647000  | 0.248898000  |
| F  | -1.374191000 | 5.318595000  | -1.325558000 |
| H  | -2.770595000 | 3.724492000  | -2.245457000 |
| C  | -2.848830000 | 2.878403000  | -2.946505000 |
| Cl | -4.587979000 | 2.448740000  | -3.156058000 |
| Cl | -2.084720000 | 3.368951000  | -4.495311000 |
| H  | -2.318285000 | 1.988752000  | -2.572495000 |
| H  | 2.444277000  | 5.408154000  | -0.687653000 |
| C  | 3.310630000  | 5.966761000  | -0.297669000 |
| Cl | 3.675754000  | 5.376756000  | 1.362374000  |
| Cl | 4.690001000  | 5.732103000  | -1.428755000 |
| H  | 3.110218000  | 7.049466000  | -0.230393000 |
| H  | 0.444144000  | 2.841725000  | -3.450660000 |
| C  | 1.084531000  | 1.970498000  | -3.254291000 |
| Cl | 0.067351000  | 0.490162000  | -3.422423000 |



Cl 2.447645000 1.987212000 -4.418040000  
H 1.489760000 1.986369000 -2.232702000  
97

"long"-[Cp\*Ru(dppm)(H<sub>2</sub>)]+ --- BF<sub>4</sub>\*3CH<sub>2</sub>Cl<sub>2</sub>-iso in CH<sub>2</sub>Cl<sub>2</sub>, E = -5435,342604

Ru -1.717090000 1.199790000 1.078790000  
C -1.512259000 -0.762191000 -0.016099000  
C -2.841614000 -0.214086000 -0.214107000  
C -3.498562000 -0.141653000 1.077007000  
C -2.569309000 -0.656188000 2.078145000  
C -1.362002000 -1.057291000 1.393216000  
C -0.528297000 -1.118523000 -1.093407000  
C -3.479745000 0.093264000 -1.538753000  
C -4.953486000 0.165060000 1.291500000  
C -2.880290000 -0.886080000 3.528933000  
C -0.195864000 -1.776055000 1.999685000  
C -0.455303000 3.430359000 2.903588000  
P -2.202935000 2.949117000 2.517489000  
C -3.029140000 4.472535000 1.900421000  
C -2.794869000 5.695928000 2.569189000  
C -3.439062000 6.864497000 2.129258000  
C -4.329372000 6.815111000 1.037814000  
C -4.572201000 5.594402000 0.380050000  
C -3.918495000 4.423087000 0.808026000  
C -3.099356000 2.701872000 4.106428000  
C -4.488266000 2.442658000 4.022278000  
C -5.238534000 2.209682000 5.186409000  
C -4.609778000 2.242128000 6.447774000  
C -3.236710000 2.533343000 6.537466000  
C -2.479034000 2.767693000 5.372782000  
P 0.252404000 1.965241000 2.011784000  
C 1.652870000 2.570582000 1.000313000  
C 2.575917000 3.469863000 1.581774000  
C 3.677103000 3.916048000 0.832451000  
C 3.864571000 3.465085000 -0.489658000  
C 2.946202000 2.566886000 -1.066681000  
C 1.837736000 2.119797000 -0.322777000  
C 1.075902000 0.940686000 3.292227000  
C 0.403069000 0.673062000 4.506865000  
C 0.996112000 -0.154457000 5.473197000  
C 2.255326000 -0.737560000 5.228052000  
C 2.922214000 -0.482268000 4.017472000  
C 2.338004000 0.356736000 3.050662000  
H -2.102787000 5.741146000 3.423767000  
H -3.234247000 7.818753000 2.634972000  
H -4.831914000 7.733090000 0.697091000  
H -5.267004000 5.552371000 -0.472316000  
H -4.093484000 3.468012000 0.289514000  
H -4.986415000 2.438956000 3.042766000  
H -6.317292000 2.006537000 5.108548000  
H -5.195162000 2.056864000 7.361016000  
H -2.743110000 2.588987000 7.517574000  
H -1.420897000 3.038435000 5.475681000

|    |              |              |              |
|----|--------------|--------------|--------------|
| H  | 2.432781000  | 3.827856000  | 2.610751000  |
| H  | 4.393583000  | 4.617218000  | 1.286138000  |
| H  | 4.729041000  | 3.816962000  | -1.073027000 |
| H  | 3.090291000  | 2.213948000  | -2.098925000 |
| H  | 1.111887000  | 1.423355000  | -0.768019000 |
| H  | -0.582834000 | 1.111862000  | 4.705221000  |
| H  | 0.480574000  | -0.328464000 | 6.427559000  |
| H  | 2.722107000  | -1.377112000 | 5.991139000  |
| H  | 3.913011000  | -0.920361000 | 3.827838000  |
| H  | 2.873139000  | 0.566991000  | 2.114588000  |
| H  | -2.313383000 | 2.342431000  | 0.144587000  |
| H  | -0.935827000 | 1.909900000  | -0.120780000 |
| H  | -0.699616000 | -2.159817000 | -1.441238000 |
| H  | 0.513053000  | -1.058290000 | -0.725605000 |
| H  | -0.624423000 | -0.450073000 | -1.968915000 |
| H  | -3.960028000 | -0.821484000 | -1.947382000 |
| H  | -4.261003000 | 0.869630000  | -1.440931000 |
| H  | -2.734882000 | 0.441713000  | -2.278267000 |
| H  | -5.571700000 | -0.690805000 | 0.945433000  |
| H  | -5.179053000 | 0.325732000  | 2.359594000  |
| H  | -5.278223000 | 1.058939000  | 0.726483000  |
| H  | -3.419576000 | -1.848923000 | 3.657639000  |
| H  | -1.958448000 | -0.933887000 | 4.136176000  |
| H  | -3.519476000 | -0.084589000 | 3.941371000  |
| H  | -0.095135000 | -1.569708000 | 3.078866000  |
| H  | 0.756119000  | -1.505161000 | 1.508636000  |
| H  | -0.340257000 | -2.870292000 | 1.872535000  |
| H  | -0.162083000 | 3.513106000  | 3.960882000  |
| H  | -0.192500000 | 4.357973000  | 2.365271000  |
| F  | 1.900670000  | 5.106238000  | 4.436588000  |
| F  | 0.655343000  | 3.743975000  | 5.844530000  |
| B  | 1.007176000  | 5.112340000  | 5.549621000  |
| F  | -0.171296000 | 5.818323000  | 5.197711000  |
| F  | 1.636148000  | 5.686719000  | 6.664131000  |
| H  | 0.681970000  | 2.686598000  | 7.650268000  |
| C  | 0.378133000  | 2.496427000  | 8.691680000  |
| H  | 1.238174000  | 2.421787000  | 9.377850000  |
| Cl | -0.513375000 | 0.930966000  | 8.750785000  |
| Cl | -0.642715000 | 3.877506000  | 9.213046000  |
| H  | 0.617936000  | 6.526611000  | 3.122597000  |
| C  | 0.771861000  | 7.185967000  | 2.253493000  |
| H  | 1.827085000  | 7.489317000  | 2.150994000  |
| Cl | -0.214995000 | 8.664683000  | 2.491710000  |
| Cl | 0.322475000  | 6.284864000  | 0.757188000  |
| H  | 2.603211000  | 2.359392000  | 5.188042000  |
| C  | 3.534776000  | 2.711354000  | 5.655634000  |
| H  | 3.473328000  | 3.772696000  | 5.937892000  |
| Cl | 4.868225000  | 2.527530000  | 4.466292000  |
| Cl | 3.798663000  | 1.755966000  | 7.157309000  |
